# Supplementary material for: Pharmacogenetic investigation of efficacy response to mepolizumab in eosinophilic granulomatosis with polyangiitis
Source: Springer Nature journal article supplement (doi:10.1007/s00296-020-04523-6), 2020-02-03
Supplement: MOESM1 [file 17619642]

**SUPPLEMENTAL TABLE 1. Disease Associated Genes: A) EGPA associated genes**

| <b>Symbol</b>   | <b>Gene Name</b>                         |
|-----------------|------------------------------------------|
| <i>IL5</i>      | interleukin 5                            |
| <i>MPO</i>      | myeloperoxidase                          |
| <i>RNASE3</i>   | ribonuclease A family member 3           |
| <i>CCL26</i>    | C-C motif chemokine ligand 26            |
| <i>CD34</i>     | CD34 molecule                            |
| <i>IL2</i>      | interleukin 2                            |
| <i>CCL17</i>    | C-C motif chemokine ligand 17            |
| <i>BCHE</i>     | butyrylcholinesterase                    |
| <i>IL10</i>     | interleukin 10                           |
| <i>LEPR</i>     | leptin receptor                          |
| <i>KLRK1</i>    | killer cell lectin like receptor K1      |
| <i>IL6</i>      | interleukin 6                            |
| <i>PRTN3</i>    | proteinase 3                             |
| <i>IL13</i>     | interleukin 13                           |
| <i>IL4</i>      | interleukin 4                            |
| <i>RNASE2</i>   | ribonuclease A family member 2           |
| <i>UGCG</i>     | UDP-glucose ceramide glucosyltransferase |
| <i>SERPINA1</i> | serpin family A member 1                 |
| <i>ACR</i>      | acrosin                                  |
| <i>SIGLEC8</i>  | sialic acid binding Ig like lectin 8     |
| <i>SSRP1</i>    | structure specific recognition protein 1 |
| <i>ITGB2</i>    | integrin subunit beta 2                  |

|                 |                                                    |
|-----------------|----------------------------------------------------|
| <i>PTPN22</i>   | protein tyrosine phosphatase, non-receptor type 22 |
| <i>LEP</i>      | leptin                                             |
| <i>TNFSF13B</i> | tumor necrosis factor superfamily member 13b       |
| <i>TGFB1</i>    | transforming growth factor beta 1                  |
| <i>FASLG</i>    | Fas ligand                                         |
| <i>PRSS3</i>    | protease, serine 3                                 |
| <i>THBD</i>     | thrombomodulin                                     |
| <i>VTN</i>      | vitronectin                                        |
| <i>MMP3</i>     | matrix metalloproteinase 3                         |
| <i>VWF</i>      | von Willebrand factor                              |
| <i>APOH</i>     | apolipoprotein H                                   |
| <i>FN1</i>      | fibronectin 1                                      |
| <i>TGFB2</i>    | transforming growth factor beta 2                  |
| <i>CXCL13</i>   | C-X-C motif chemokine ligand 13                    |
| <i>MS4A1</i>    | membrane spanning 4-domains A1                     |
| <i>LTF</i>      | lactotransferrin                                   |
| <i>EPX</i>      | eosinophil peroxidase                              |
| <i>CDK9</i>     | cyclin dependent kinase 9                          |

**SUPPLEMENTAL TABLE 1. Disease Associated Genes: B) Asthma associated genes**

| <b>Symbol</b>  | <b>Gene Name</b>                               |
|----------------|------------------------------------------------|
| <i>PDE4D</i>   | phosphodiesterase 4D                           |
| <i>ORMDL3</i>  | ORMDL sphingolipid biosynthesis regulator 3    |
| <i>PTGDR</i>   | prostaglandin D2 receptor                      |
| <i>PTGS2</i>   | prostaglandin-endoperoxide synthase 2          |
| <i>ALOX5</i>   | arachidonate 5-lipoxygenase                    |
| <i>IL5</i>     | interleukin 5                                  |
| <i>CHI3L1</i>  | chitinase 3 like 1                             |
| <i>ADRB2</i>   | adrenoceptor beta 2                            |
| <i>ADAM33</i>  | ADAM metallopeptidase domain 33                |
| <i>NR3C1</i>   | nuclear receptor subfamily 3 group C member 1  |
| <i>NPSR1</i>   | neuropeptide S receptor 1                      |
| <i>PLA2G7</i>  | phospholipase A2 group VII                     |
| <i>PTGS1</i>   | prostaglandin-endoperoxide synthase 1          |
| <i>VDR</i>     | vitamin D (1,25- dihydroxyvitamin D3) receptor |
| <i>CYSLTR1</i> | cysteinyl leukotriene receptor 1               |
| <i>MUC7</i>    | mucin 7, secreted                              |
| <i>DPP10</i>   | dipeptidyl peptidase like 10                   |
| <i>IRAK3</i>   | interleukin 1 receptor associated kinase 3     |
| <i>HRH1</i>    | histamine receptor H1                          |
| <i>ADRB1</i>   | adrenoceptor beta 1                            |
| <i>CHRM3</i>   | cholinergic receptor muscarinic 3              |
| <i>DENND1B</i> | DENN domain containing 1B                      |
| <i>PDE4B</i>   | phosphodiesterase 4B                           |

|                |                                                |
|----------------|------------------------------------------------|
| <i>ADRA1B</i>  | adrenoceptor alpha 1B                          |
| <i>IGHE</i>    | immunoglobulin heavy constant epsilon          |
| <i>ADRB3</i>   | adrenoceptor beta 3                            |
| <i>ADORA2B</i> | adenosine A2b receptor                         |
| <i>ADRA2A</i>  | adrenoceptor alpha 2A                          |
| <i>PDE4A</i>   | phosphodiesterase 4A                           |
| <i>CHRN2</i>   | cholinergic receptor nicotinic beta 2 subunit  |
| <i>ADRA1A</i>  | adrenoceptor alpha 1A                          |
| <i>ADRA1D</i>  | adrenoceptor alpha 1D                          |
| <i>ADORA3</i>  | adenosine A3 receptor                          |
| <i>PDE3A</i>   | phosphodiesterase 3A                           |
| <i>PDE4C</i>   | phosphodiesterase 4C                           |
| <i>ATP4A</i>   | ATPase H+/K+ transporting alpha subunit        |
| <i>ATP4B</i>   | ATPase H+/K+ transporting beta subunit         |
| <i>PDE3B</i>   | phosphodiesterase 3B                           |
| <i>CHRNA4</i>  | cholinergic receptor nicotinic alpha 4 subunit |
| <i>ADRA2C</i>  | adrenoceptor alpha 2C                          |
| <i>ADORA2A</i> | adenosine A2a receptor                         |
| <i>ADRA2B</i>  | adrenoceptor alpha 2B                          |
| <i>ADORA1</i>  | adenosine A1 receptor                          |
| <i>PTGDR2</i>  | prostaglandin D2 receptor 2                    |
| <i>GSDMB</i>   | gasdermin B                                    |
| <i>HMGCR</i>   | 3-hydroxy-3-methylglutaryl-CoA reductase       |
| <i>GSDMA</i>   | gasdermin A                                    |
| <i>TSLP</i>    | thymic stromal lymphopoietin                   |

|                 |                                                                  |
|-----------------|------------------------------------------------------------------|
| <i>IL1RL1</i>   | interleukin 1 receptor like 1                                    |
| <i>PDGFRB</i>   | platelet derived growth factor receptor beta                     |
| <i>KIT</i>      | KIT proto-oncogene receptor tyrosine kinase                      |
| <i>PDGFRA</i>   | platelet derived growth factor receptor alpha                    |
| <i>FGFR3</i>    | fibroblast growth factor receptor 3                              |
| <i>TRPV1</i>    | transient receptor potential cation channel subfamily V member 1 |
| <i>FAAH</i>     | fatty acid amide hydrolase                                       |
| <i>DHFR</i>     | dihydrofolate reductase                                          |
| <i>CRB1</i>     | crumbs 1, cell polarity complex component                        |
| <i>IL33</i>     | interleukin 33                                                   |
| <i>HLA-DQB1</i> | major histocompatibility complex, class II, DQ beta 1            |
| <i>CDHR3</i>    | cadherin related family member 3                                 |
| <i>PBX2</i>     | PBX homeobox 2                                                   |
| <i>C6orf10</i>  | chromosome 6 open reading frame 10                               |
| <i>IL18R1</i>   | interleukin 18 receptor 1                                        |
| <i>HLA-DRA</i>  | major histocompatibility complex, class II, DR alpha             |
| <i>IKZF4</i>    | IKAROS family zinc finger 4                                      |
| <i>TLR1</i>     | toll like receptor 1                                             |
| <i>SLC30A8</i>  | solute carrier family 30 member 8                                |
| <i>GATA3</i>    | GATA binding protein 3                                           |
| <i>GPSM3</i>    | G-protein signaling modulator 3                                  |
| <i>SMAD3</i>    | SMAD family member 3                                             |
| <i>CXCL11</i>   | C-X-C motif chemokine ligand 11                                  |
| <i>PMEL</i>     | premelanosome protein                                            |
| <i>CDK2</i>     | cyclin dependent kinase 2                                        |

|                 |                                                             |
|-----------------|-------------------------------------------------------------|
| <i>WDR36</i>    | WD repeat domain 36                                         |
| <i>HLA-DPA1</i> | major histocompatibility complex, class II, DP alpha 1      |
| <i>IL13</i>     | interleukin 13                                              |
| <i>USP38</i>    | ubiquitin specific peptidase 38                             |
| <i>CXCL9</i>    | C-X-C motif chemokine ligand 9                              |
| <i>HLA-DQA2</i> | major histocompatibility complex, class II, DQ alpha 2      |
| <i>PYHIN1</i>   | pyrin and HIN domain family member 1                        |
| <i>CCL5</i>     | C-C motif chemokine ligand 5                                |
| <i>IL6R</i>     | interleukin 6 receptor                                      |
| <i>IFNL1</i>    | interferon lambda 1                                         |
| <i>IL2RB</i>    | interleukin 2 receptor subunit beta                         |
| <i>CLEC16A</i>  | C-type lectin domain family 16 member A                     |
| <i>IFNL2</i>    | interferon lambda 2                                         |
| <i>RAD50</i>    | RAD50 double strand break repair protein                    |
| <i>IFNL3</i>    | interferon lambda 3                                         |
| <i>RORA</i>     | RAR related orphan receptor A                               |
| <i>GAB1</i>     | GRB2 associated binding protein 1                           |
| <i>HLA-DQA1</i> | major histocompatibility complex, class II, DQ alpha 1      |
| <i>ZBP1</i>     | Z-DNA binding protein 1                                     |
| <i>RSAD2</i>    | radical S-adenosyl methionine domain containing 2           |
| <i>PPARG</i>    | peroxisome proliferator activated receptor gamma            |
| <i>SMPD1</i>    | sphingomyelin phosphodiesterase 1                           |
| <i>SLC22A5</i>  | solute carrier family 22 member 5                           |
| <i>IFIT3</i>    | interferon induced protein with tetratricopeptide repeats 3 |
| <i>LGALS17A</i> | Charcot-Leyden crystal protein pseudogene                   |

|                 |                                                              |
|-----------------|--------------------------------------------------------------|
| <i>CXCR2</i>    | C-X-C motif chemokine receptor 2                             |
| <i>EDNRA</i>    | endothelin receptor type A                                   |
| <i>TNFSF13B</i> | tumor necrosis factor superfamily member 13b                 |
| <i>ZBTB10</i>   | zinc finger and BTB domain containing 10                     |
| <i>IKZF3</i>    | IKAROS family zinc finger 3                                  |
| <i>IRF1</i>     | interferon regulatory factor 1                               |
| <i>EDNRB</i>    | endothelin receptor type B                                   |
| <i>CXCR1</i>    | C-X-C motif chemokine receptor 1                             |
| <i>RAP1GAP2</i> | RAP1 GTPase activating protein 2                             |
| <i>BRD2</i>     | bromodomain containing 2                                     |
| <i>DDX58</i>    | DEXD/H-box helicase 58                                       |
| <i>XKR6</i>     | XK related 6                                                 |
| <i>IL4I1</i>    | interleukin 4 induced 1                                      |
| <i>KCNN4</i>    | potassium calcium-activated channel subfamily N member 4     |
| <i>VAV3</i>     | vav guanine nucleotide exchange factor 3                     |
| <i>TNS1</i>     | tensin 1                                                     |
| <i>PRKG1</i>    | protein kinase, cGMP-dependent, type I                       |
| <i>APOBEC3A</i> | apolipoprotein B mRNA editing enzyme catalytic subunit 3A    |
| <i>SOCS1</i>    | suppressor of cytokine signaling 1                           |
| <i>BTNL2</i>    | butyrophilin like 2                                          |
| <i>ERBB4</i>    | erb-b2 receptor tyrosine kinase 4                            |
| <i>C5orf56</i>  | chromosome 5 open reading frame 56                           |
| <i>HERC5</i>    | HECT and RLD domain containing E3 ubiquitin protein ligase 5 |
| <i>LRRC32</i>   | leucine rich repeat containing 32                            |
| <i>IFIH1</i>    | interferon induced with helicase C domain 1                  |

|                 |                                                                        |
|-----------------|------------------------------------------------------------------------|
| <i>IDO1</i>     | indoleamine 2,3-dioxygenase 1                                          |
| <i>HTR2A</i>    | 5-hydroxytryptamine receptor 2A                                        |
| <i>BATF2</i>    | basic leucine zipper ATF-like transcription factor 2                   |
| <i>ETV7</i>     | ETS variant 7                                                          |
| <i>RBM17</i>    | RNA binding motif protein 17                                           |
| <i>SAMD9L</i>   | sterile alpha motif domain containing 9 like                           |
| <i>ISG15</i>    | ISG15 ubiquitin-like modifier                                          |
| <i>FGD2</i>     | FYVE, RhoGEF and PH domain containing 2                                |
| <i>FAM19A2</i>  | family with sequence similarity 19 member A2, C-C motif chemokine like |
| <i>LAG3</i>     | lymphocyte activating 3                                                |
| <i>DDX60L</i>   | DEAD-box helicase 60-like                                              |
| <i>MX2</i>      | MX dynamin like GTPase 2                                               |
| <i>MMP13</i>    | matrix metalloproteinase 13                                            |
| <i>COMMD10</i>  | COMM domain containing 10                                              |
| <i>ACO1</i>     | aconitase 1                                                            |
| <i>ZNF665</i>   | zinc finger protein 665                                                |
| <i>MX1</i>      | MX dynamin like GTPase 1                                               |
| <i>IL17A</i>    | interleukin 17A                                                        |
| <i>SOCS3</i>    | suppressor of cytokine signaling 3                                     |
| <i>IL17C</i>    | interleukin 17C                                                        |
| <i>KCNQ4</i>    | potassium voltage-gated channel subfamily Q member 4                   |
| <i>CD274</i>    | CD274 molecule                                                         |
| <i>S1PR3</i>    | sphingosine-1-phosphate receptor 3                                     |
| <i>C6orf118</i> | chromosome 6 open reading frame 118                                    |
| <i>TMEM232</i>  | transmembrane protein 232                                              |

|                  |                                           |
|------------------|-------------------------------------------|
| <i>EPST11</i>    | epithelial stromal interaction 1 (breast) |
| <i>GMPR</i>      | guanosine monophosphate reductase         |
| <i>ISG20</i>     | interferon stimulated exonuclease gene 20 |
| <i>CD86</i>      | CD86 molecule                             |
| <i>CD80</i>      | CD80 molecule                             |
| <i>SEMA3D</i>    | semaphorin 3D                             |
| <i>PTH1H</i>     | parathyroid hormone like hormone          |
| <i>HRH4</i>      | histamine receptor H4                     |
| <i>P2RY12</i>    | purinergic receptor P2Y12                 |
| <i>OAS1</i>      | 2'-5'-oligoadenylate synthetase 1         |
| <i>TMEM171</i>   | transmembrane protein 171                 |
| <i>S1PR1</i>     | sphingosine-1-phosphate receptor 1        |
| <i>RAB11FIP2</i> | RAB11 family interacting protein 2        |
| <i>CMPK2</i>     | cytidine/uridine monophosphate kinase 2   |
| <i>GBP1P1</i>    | guanylate binding protein 1 pseudogene 1  |
| <i>IFI35</i>     | interferon induced protein 35             |
| <i>USP18</i>     | ubiquitin specific peptidase 18           |
| <i>OAS3</i>      | 2'-5'-oligoadenylate synthetase 3         |
| <i>GBP5</i>      | guanylate binding protein 5               |
| <i>SYK</i>       | spleen associated tyrosine kinase         |
| <i>EDIL3</i>     | EGF like repeats and discoidin domains 3  |
| <i>CRCT1</i>     | cysteine rich C-terminal 1                |
| <i>DUOXA2</i>    | dual oxidase maturation factor 2          |
| <i>HELZ2</i>     | helicase with zinc finger 2               |
| <i>RBM7</i>      | RNA binding motif protein 7               |

|                 |                                                                           |
|-----------------|---------------------------------------------------------------------------|
| <i>MAP3K13</i>  | mitogen-activated protein kinase kinase kinase 13                         |
| <i>IFNAR1</i>   | interferon alpha and beta receptor subunit 1                              |
| <i>S1PR2</i>    | sphingosine-1-phosphate receptor 2                                        |
| <i>S1PR5</i>    | sphingosine-1-phosphate receptor 5                                        |
| <i>LIFR</i>     | leukemia inhibitory factor receptor alpha                                 |
| <i>MMADHC</i>   | methylnalonic aciduria and homocystinuria, cbID type                      |
| <i>SLC15A3</i>  | solute carrier family 15 member 3                                         |
| <i>TRANK1</i>   | tetratricopeptide repeat and ankyrin repeat containing 1                  |
| <i>NCF1</i>     | neutrophil cytosolic factor 1                                             |
| <i>TAP1</i>     | transporter 1, ATP binding cassette subfamily B member                    |
| <i>IFNAR2</i>   | interferon alpha and beta receptor subunit 2                              |
| <i>MYCN</i>     | v-myc avian myelocytomatosis viral oncogene neuroblastoma derived homolog |
| <i>FDPS</i>     | farnesyl diphosphate synthase                                             |
| <i>S1PR4</i>    | sphingosine-1-phosphate receptor 4                                        |
| <i>ABL1</i>     | ABL proto-oncogene 1, non-receptor tyrosine kinase                        |
| <i>MAPK14</i>   | mitogen-activated protein kinase 14                                       |
| <i>FGFR2</i>    | fibroblast growth factor receptor 2                                       |
| <i>PDCD1LG2</i> | programmed cell death 1 ligand 2                                          |
| <i>CD38</i>     | CD38 molecule                                                             |
| <i>GBP1</i>     | guanylate binding protein 1                                               |
| <i>THEMIS2</i>  | thymocyte selection associated family member 2                            |
| <i>BCL2A1</i>   | BCL2 related protein A1                                                   |
| <i>IRF7</i>     | interferon regulatory factor 7                                            |
| <i>NLRC5</i>    | NLR family CARD domain containing 5                                       |
| <i>BRIP1</i>    | BRCA1 interacting protein C-terminal helicase 1                           |

|                 |                                                                            |
|-----------------|----------------------------------------------------------------------------|
| <i>SAMD9</i>    | sterile alpha motif domain containing 9                                    |
| <i>OAS2</i>     | 2'-5'-oligoadenylate synthetase 2                                          |
| <i>STAT1</i>    | signal transducer and activator of transcription 1                         |
| <i>NOS2</i>     | nitric oxide synthase 2                                                    |
| <i>CLDN14</i>   | claudin 14                                                                 |
| <i>RANBP6</i>   | RAN binding protein 6                                                      |
| <i>HSH2D</i>    | hematopoietic SH2 domain containing                                        |
| <i>IL19</i>     | interleukin 19                                                             |
| <i>C19orf66</i> | chromosome 19 open reading frame 66                                        |
| <i>BST2</i>     | bone marrow stromal cell antigen 2                                         |
| <i>IL36G</i>    | interleukin 36, gamma                                                      |
| <i>PLAUR</i>    | plasminogen activator, urokinase receptor                                  |
| <i>NDFIP1</i>   | Nedd4 family interacting protein 1                                         |
| <i>IL23A</i>    | interleukin 23 subunit alpha                                               |
| <i>DDX60</i>    | DEXD/H-box helicase 60                                                     |
| <i>LMO2</i>     | LIM domain only 2                                                          |
| <i>APOBEC3G</i> | apolipoprotein B mRNA editing enzyme catalytic subunit 3G                  |
| <i>PLA2G4E</i>  | phospholipase A2 group IVE                                                 |
| <i>MLKL</i>     | mixed lineage kinase domain like                                           |
| <i>IFI44L</i>   | interferon induced protein 44 like                                         |
| <i>SPRR2F</i>   | small proline rich protein 2F                                              |
| <i>HERC6</i>    | HECT and RLD domain containing E3 ubiquitin protein ligase family member 6 |
| <i>XAF1</i>     | XIAP associated factor 1                                                   |
| <i>SP110</i>    | SP110 nuclear body protein                                                 |
| <i>APOL3</i>    | apolipoprotein L3                                                          |

|                   |                                                                      |
|-------------------|----------------------------------------------------------------------|
| <i>IFITM1</i>     | interferon induced transmembrane protein 1                           |
| <i>SCG3</i>       | secretogranin III                                                    |
| <i>LAMP3</i>      | lysosomal associated membrane protein 3                              |
| <i>URI1</i>       | URI1, prefoldin like chaperone                                       |
| <i>CX3CL1</i>     | C-X3-C motif chemokine ligand 1                                      |
| <i>GCH1</i>       | GTP cyclohydrolase 1                                                 |
| <i>IL18BP</i>     | interleukin 18 binding protein                                       |
| <i>FRMD3</i>      | FERM domain containing 3                                             |
| <i>PPM1K</i>      | protein phosphatase, Mg <sup>2+</sup> /Mn <sup>2+</sup> dependent 1K |
| <i>NT5C3A</i>     | 5'-nucleotidase, cytosolic IIIA                                      |
| <i>RASGRP3</i>    | RAS guanyl releasing protein 3                                       |
| <i>CEACAM1</i>    | carcinoembryonic antigen related cell adhesion molecule 1            |
| <i>SECTM1</i>     | secreted and transmembrane 1                                         |
| <i>CASP1</i>      | caspase 1                                                            |
| <i>IL15RA</i>     | interleukin 15 receptor subunit alpha                                |
| <i>RNF213</i>     | ring finger protein 213                                              |
| <i>PIK3AP1</i>    | phosphoinositide-3-kinase adaptor protein 1                          |
| <i>DUOX2</i>      | dual oxidase 2                                                       |
| <i>IFI44</i>      | interferon induced protein 44                                        |
| <i>TGFB2</i>      | transforming growth factor beta 2                                    |
| <i>TGFB1</i>      | transforming growth factor beta 1                                    |
| <i>APOBEC3B</i>   | apolipoprotein B mRNA editing enzyme catalytic subunit 3B            |
| <i>SERPINB9P1</i> | serpin family B member 9 pseudogene 1                                |
| <i>PLEKHA4</i>    | pleckstrin homology domain containing A4                             |
| <i>NUB1</i>       | negative regulator of ubiquitin like proteins 1                      |

|                     |                                                |
|---------------------|------------------------------------------------|
| <i>RTP4</i>         | receptor transporter protein 4                 |
| <i>NUPR1</i>        | nuclear protein 1, transcriptional regulator   |
| <i>KLHDC7B</i>      | kelch domain containing 7B                     |
| <i>CXCL8</i>        | C-X-C motif chemokine ligand 8                 |
| <i>SERPINB9</i>     | serpin family B member 9                       |
| <i>TLR3</i>         | toll like receptor 3                           |
| <i>DST</i>          | dystonin                                       |
| <i>CFP</i>          | complement factor properdin                    |
| <i>CYP2J2</i>       | cytochrome P450 family 2 subfamily J member 2  |
| <i>MAVS</i>         | mitochondrial antiviral signaling protein      |
| <i>IL1RN</i>        | interleukin 1 receptor antagonist              |
| <i>TLX1NB</i>       | TLX1 neighbor                                  |
| <i>TAGAP</i>        | T-cell activation RhoGTPase activating protein |
| <i>ZNF618</i>       | zinc finger protein 618                        |
| <i>TMEM92</i>       | transmembrane protein 92                       |
| <i>APOL2</i>        | apolipoprotein L2                              |
| <i>CLEC7A</i>       | C-type lectin domain family 7 member A         |
| <i>LEP</i>          | leptin                                         |
| <i>SLC25A28</i>     | solute carrier family 25 member 28             |
| <i>CTA-384D8.31</i> |                                                |
| <i>TRIM22</i>       | tripartite motif containing 22                 |
| <i>UBE2L6</i>       | ubiquitin conjugating enzyme E2 L6             |
| <i>PARP12</i>       | poly(ADP-ribose) polymerase family member 12   |
| <i>MMRN1</i>        | multimerin 1                                   |

|                |                                                    |
|----------------|----------------------------------------------------|
| <i>BIRC3</i>   | baculoviral IAP repeat containing 3                |
| <i>LGALS9</i>  | galectin 9                                         |
| <i>IFI6</i>    | interferon alpha inducible protein 6               |
| <i>JAK2</i>    | Janus kinase 2                                     |
| <i>STAT2</i>   | signal transducer and activator of transcription 2 |
| <i>IL6</i>     | interleukin 6                                      |
| <i>PLA2G10</i> | phospholipase A2 group X                           |
| <i>ITGB6</i>   | integrin subunit beta 6                            |
| <i>TYMP</i>    | thymidine phosphorylase                            |
| <i>TRIM21</i>  | tripartite motif containing 21                     |
| <i>BCL2L14</i> | BCL2 like 14                                       |
| <i>DHX58</i>   | DEXH-box helicase 58                               |
| <i>ADAM8</i>   | ADAM metallopeptidase domain 8                     |
| <i>LBP</i>     | lipopolysaccharide binding protein                 |
| <i>AIM2</i>    | absent in melanoma 2                               |
| <i>NCF1B</i>   | neutrophil cytosolic factor 1B pseudogene          |
| <i>STARD5</i>  | StAR related lipid transfer domain containing 5    |
| <i>TRIB2</i>   | tribbles pseudokinase 2                            |
| <i>LRRC3C</i>  | leucine rich repeat containing 3C                  |
| <i>IL18</i>    | interleukin 18                                     |
| <i>SFTPD</i>   | surfactant protein D                               |
| <i>TNFAIP3</i> | TNF alpha induced protein 3                        |
| <i>TRIM5</i>   | tripartite motif containing 5                      |
| <i>STARD4</i>  | StAR related lipid transfer domain containing 4    |
| <i>ZNFX1</i>   | zinc finger NFX1-type containing 1                 |

|                     |                                                                       |
|---------------------|-----------------------------------------------------------------------|
| <i>EREG</i>         | epiregulin                                                            |
| <i>MXD1</i>         | MAX dimerization protein 1                                            |
| <i>LIF</i>          | leukemia inhibitory factor                                            |
| <i>IL1A</i>         | interleukin 1 alpha                                                   |
| <i>FGF20</i>        | fibroblast growth factor 20                                           |
| <i>ECSCR</i>        | endothelial cell surface expressed chemotaxis and apoptosis regulator |
| <i>CMYA5</i>        | cardiomyopathy associated 5                                           |
| <i>NFKBIA</i>       | NFKB inhibitor alpha                                                  |
| <i>CRLF2</i>        | cytokine receptor-like factor 2                                       |
| <i>SYNPO2</i>       | synaptopodin 2                                                        |
| <i>PARP10</i>       | poly(ADP-ribose) polymerase family member 10                          |
| <i>ENDOD1</i>       | endonuclease domain containing 1                                      |
| <i>PMAIP1</i>       | phorbol-12-myristate-13-acetate-induced protein 1                     |
| <i>APOBEC3F</i>     | apolipoprotein B mRNA editing enzyme catalytic subunit 3F             |
| <i>PSMB9</i>        | proteasome subunit beta 9                                             |
| <i>HLA-F</i>        | major histocompatibility complex, class I, F                          |
| <i>POU2F3</i>       | POU class 2 homeobox 3                                                |
| <i>GALM</i>         | galactose mutarotase                                                  |
| <i>RP11-400K9.4</i> |                                                                       |
| <i>KLHL6</i>        | kelch like family member 6                                            |
| <i>CSRNP1</i>       | cysteine and serine rich nuclear protein 1                            |
| <i>TAP2</i>         | transporter 2, ATP binding cassette subfamily B member                |
| <i>PNPT1</i>        | polyribonucleotide nucleotidyltransferase 1                           |
| <i>MT2A</i>         | metallothionein 2A                                                    |

|                  |                                                    |
|------------------|----------------------------------------------------|
| <i>TLR2</i>      | toll like receptor 2                               |
| <i>GRIN3A</i>    | glutamate ionotropic receptor NMDA type subunit 3A |
| <i>CNP</i>       | 2',3'-cyclic nucleotide 3' phosphodiesterase       |
| <i>SPATS2L</i>   | spermatogenesis associated serine rich 2 like      |
| <i>SP100</i>     | SP100 nuclear antigen                              |
| <i>PRICKLE4</i>  | prickle planar cell polarity protein 4             |
| <i>OPTN</i>      | optineurin                                         |
| <i>PARP9</i>     | poly(ADP-ribose) polymerase family member 9        |
| <i>TMEM106A</i>  | transmembrane protein 106A                         |
| <i>TOR1B</i>     | torsin family 1 member B                           |
| <i>SRY</i>       | sex determining region Y                           |
| <i>IL10</i>      | interleukin 10                                     |
| <i>POSTN</i>     | periostin                                          |
| <i>RIPK2</i>     | receptor interacting serine/threonine kinase 2     |
| <i>FAM46A</i>    | family with sequence similarity 46 member A        |
| <i>RETN</i>      | resistin                                           |
| <i>IL2</i>       | interleukin 2                                      |
| <i>DDIAS</i>     | DNA damage induced apoptosis suppressor            |
| <i>IL1B</i>      | interleukin 1 beta                                 |
| <i>RBM11</i>     | RNA binding motif protein 11                       |
| <i>CCL22</i>     | C-C motif chemokine ligand 22                      |
| <i>ADCY4</i>     | adenylate cyclase 4                                |
| <i>CIC</i>       | capicua transcriptional repressor                  |
| <i>UCKL1-AS1</i> | UCKL1 antisense RNA 1                              |
| <i>RNASE3</i>    | ribonuclease A family member 3                     |

|                     |                                                                               |
|---------------------|-------------------------------------------------------------------------------|
| <i>HMGB1</i>        | high mobility group box 1                                                     |
| <i>CCL11</i>        | C-C motif chemokine ligand 11                                                 |
| <i>DUSP5</i>        | dual specificity phosphatase 5                                                |
| <i>NMI</i>          | N-myc and STAT interactor                                                     |
| <i>TRIM38</i>       | tripartite motif containing 38                                                |
| <i>IFI27</i>        | interferon alpha inducible protein 27                                         |
| <i>HRASLS2</i>      | HRAS like suppressor 2                                                        |
| <i>PCGF5</i>        | polycomb group ring finger 5                                                  |
| <i>STOML1</i>       | stomatin like 1                                                               |
| <i>BLZF1</i>        | basic leucine zipper nuclear factor 1                                         |
| <i>MASTL</i>        | microtubule associated serine/threonine kinase like                           |
| <i>IFITM3</i>       | interferon induced transmembrane protein 3                                    |
| <i>RP11-63812.9</i> |                                                                               |
| <i>RP11-288L9.4</i> |                                                                               |
| <i>PARP14</i>       | poly(ADP-ribose) polymerase family member 14                                  |
| <i>PLA2G4A</i>      | phospholipase A2 group IVA                                                    |
| <i>CACNA1I</i>      | calcium voltage-gated channel subunit alpha1 I                                |
| <i>MYD88</i>        | myeloid differentiation primary response 88                                   |
| <i>ACE2</i>         | angiotensin I converting enzyme 2                                             |
| <i>EMP1</i>         | epithelial membrane protein 1                                                 |
| <i>IKBKE</i>        | inhibitor of kappa light polypeptide gene enhancer in B-cells, kinase epsilon |
| <i>ALOX15B</i>      | arachidonate 15-lipoxygenase, type B                                          |
| <i>CH25H</i>        | cholesterol 25-hydroxylase                                                    |

|                   |                                                                |
|-------------------|----------------------------------------------------------------|
| <i>TICAM1</i>     | toll like receptor adaptor molecule 1                          |
| <i>NEURL3</i>     | neuralized E3 ubiquitin protein ligase 3                       |
| <i>MMP9</i>       | matrix metalloproteinase 9                                     |
| <i>SCO2</i>       | SCO2 cytochrome c oxidase assembly protein                     |
| <i>MRGPRX3</i>    | MAS related GPR family member X3                               |
| <i>CSF2</i>       | colony stimulating factor 2                                    |
| <i>APOL6</i>      | apolipoprotein L6                                              |
| <i>EHD4</i>       | EH domain containing 4                                         |
| <i>RNF114</i>     | ring finger protein 114                                        |
| <i>LAP3</i>       | leucine aminopeptidase 3                                       |
| <i>CLUHP3</i>     | clustered mitochondria homolog pseudogene 3                    |
| <i>APOL1</i>      | apolipoprotein L1                                              |
| <i>GBP2</i>       | guanylate binding protein 2                                    |
| <i>TRIM25</i>     | tripartite motif containing 25                                 |
| <i>TRIM14</i>     | tripartite motif containing 14                                 |
| <i>TGM1</i>       | transglutaminase 1                                             |
| <i>SRGAP3-AS2</i> | SRGAP3 antisense RNA 2                                         |
| <i>KRT6B</i>      | keratin 6B                                                     |
| <i>ZFYVE26</i>    | zinc finger FYVE-type containing 26                            |
| <i>MCUB</i>       | mitochondrial calcium uniporter dominant negative beta subunit |
| <i>EIF2AK2</i>    | eukaryotic translation initiation factor 2 alpha kinase 2      |
| <i>IRAK2</i>      | interleukin 1 receptor associated kinase 2                     |
| <i>CHST9</i>      | carbohydrate sulfotransferase 9                                |
| <i>KITLG</i>      | KIT ligand                                                     |
| <i>ICAM1</i>      | intercellular adhesion molecule 1                              |

|                 |                                             |
|-----------------|---------------------------------------------|
| <i>TBXA2R</i>   | thromboxane A2 receptor                     |
| <i>GSTM1</i>    | glutathione S-transferase mu 1              |
| <i>CTLA4</i>    | cytotoxic T-lymphocyte associated protein 4 |
| <i>AKAP6</i>    | A-kinase anchoring protein 6                |
| <i>KIF26B</i>   | kinesin family member 26B                   |
| <i>SBK1</i>     | SH3 domain binding kinase 1                 |
| <i>PLSCR1</i>   | phospholipid scramblase 1                   |
| <i>STOML3</i>   | stomatin like 3                             |
| <i>ADAMTSL3</i> | ADAMTS like 3                               |
| <i>MAP1A</i>    | microtubule associated protein 1A           |
| <i>NCOA7</i>    | nuclear receptor coactivator 7              |
| <i>XRN1</i>     | 5'-3' exoribonuclease 1                     |
| <i>RHBDF2</i>   | rhomboid 5 homolog 2                        |
| <i>MOV10</i>    | Mov10 RISC complex RNA helicase             |
| <i>IFITM2</i>   | interferon induced transmembrane protein 2  |
| <i>STX11</i>    | syntaxin 11                                 |
| <i>DTX3L</i>    | deltex E3 ubiquitin ligase 3L               |
| <i>TNFAIP2</i>  | TNF alpha induced protein 2                 |
| <i>IL4</i>      | interleukin 4                               |
| <i>EDN1</i>     | endothelin 1                                |
| <i>MUC5AC</i>   | mucin 5AC, oligomeric mucus/gel-forming     |
| <i>ZNF804A</i>  | zinc finger protein 804A                    |
| <i>CTGF</i>     | connective tissue growth factor             |
| <i>IFNG</i>     | interferon gamma                            |
| <i>SERPINE1</i> | serpin family E member 1                    |

|                 |                                                                      |
|-----------------|----------------------------------------------------------------------|
| <i>CCL2</i>     | C-C motif chemokine ligand 2                                         |
| <i>PPM1J</i>    | protein phosphatase, Mg <sup>2+</sup> /Mn <sup>2+</sup> dependent 1J |
| <i>AGXT</i>     | alanine-glyoxylate aminotransferase                                  |
| <i>SOD2</i>     | superoxide dismutase 2, mitochondrial                                |
| <i>CD14</i>     | CD14 molecule                                                        |
| <i>HESX1</i>    | HESX homeobox 1                                                      |
| <i>LTA</i>      | lymphotoxin alpha                                                    |
| <i>CCR8</i>     | C-C motif chemokine receptor 8                                       |
| <i>KIAA0101</i> | KIAA0101                                                             |
| <i>ARSA</i>     | arylsulfatase A                                                      |
| <i>CMTR1</i>    | cap methyltransferase 1                                              |
| <i>TGM2</i>     | transglutaminase 2                                                   |
| <i>PHF11</i>    | PHD finger protein 11                                                |
| <i>ZC3HAV1</i>  | zinc finger CCCH-type containing, antiviral 1                        |
| <i>TMEM140</i>  | transmembrane protein 140                                            |
| <i>GNB4</i>     | G protein subunit beta 4                                             |
| <i>UBA7</i>     | ubiquitin like modifier activating enzyme 7                          |
| <i>TRAFD1</i>   | TRAF-type zinc finger domain containing 1                            |
| <i>LDLRAD1</i>  | low density lipoprotein receptor class A domain containing 1         |
| <i>LGMN</i>     | legumain                                                             |
| <i>TDRD7</i>    | tudor domain containing 7                                            |
| <i>IFNB1</i>    | interferon beta 1                                                    |
| <i>BCL7A</i>    | BCL tumor suppressor 7A                                              |
| <i>SPP1</i>     | secreted phosphoprotein 1                                            |
| <i>VEGFA</i>    | vascular endothelial growth factor A                                 |

|                |                                                                      |
|----------------|----------------------------------------------------------------------|
| <i>PHLPP2</i>  | PH domain and leucine rich repeat protein phosphatase 2              |
| <i>ELOVL7</i>  | ELOVL fatty acid elongase 7                                          |
| <i>IL9</i>     | interleukin 9                                                        |
| <i>CLU</i>     | clusterin                                                            |
| <i>RNASE2</i>  | ribonuclease A family member 2                                       |
| <i>KRT24</i>   | keratin 24                                                           |
| <i>TNFSF14</i> | tumor necrosis factor superfamily member 14                          |
| <i>CDKN1A</i>  | cyclin dependent kinase inhibitor 1A                                 |
| <i>GSTP1</i>   | glutathione S-transferase pi 1                                       |
| <i>BDNF</i>    | brain derived neurotrophic factor                                    |
| <i>RIPK3</i>   | receptor interacting serine/threonine kinase 3                       |
| <i>HLA-E</i>   | major histocompatibility complex, class I, E                         |
| <i>RUBCN</i>   | RUN and cysteine rich domain containing beclin 1 interacting protein |
| <i>NINJ1</i>   | ninjurin 1                                                           |
| <i>CFB</i>     | complement factor B                                                  |
| <i>IFIT5</i>   | interferon induced protein with tetratricopeptide repeats 5          |
| <i>HHLA2</i>   | HERV-H LTR-associating 2                                             |
| <i>OGFR</i>    | opioid growth factor receptor                                        |
| <i>TRIM69</i>  | tripartite motif containing 69                                       |
| <i>MOB3C</i>   | MOB kinase activator 3C                                              |
| <i>SP140L</i>  | SP140 nuclear body protein like                                      |
| <i>TNIP1</i>   | TNFAIP3 interacting protein 1                                        |
| <i>CPSF4</i>   | cleavage and polyadenylation specific factor 4                       |
| <i>FOXP3</i>   | forkhead box P3                                                      |
| <i>HMOX1</i>   | heme oxygenase 1                                                     |

|                 |                                                              |
|-----------------|--------------------------------------------------------------|
| <i>TLR4</i>     | toll like receptor 4                                         |
| <i>TLR7</i>     | toll like receptor 7                                         |
| <i>IL31</i>     | interleukin 31                                               |
| <i>CCL26</i>    | C-C motif chemokine ligand 26                                |
| <i>TULP2</i>    | tubby like protein 2                                         |
| <i>IFI16</i>    | interferon gamma inducible protein 16                        |
| <i>SQRDL</i>    | sulfide quinone reductase-like (yeast)                       |
| <i>ADH1C</i>    | alcohol dehydrogenase 1C (class I), gamma polypeptide        |
| <i>CCL13</i>    | C-C motif chemokine ligand 13                                |
| <i>HAVCR1</i>   | hepatitis A virus cellular receptor 1                        |
| <i>MPO</i>      | myeloperoxidase                                              |
| <i>TNFSF4</i>   | tumor necrosis factor superfamily member 4                   |
| <i>NGF</i>      | nerve growth factor                                          |
| <i>C8orf4</i>   | chromosome 8 open reading frame 4                            |
| <i>SP6</i>      | Sp6 transcription factor                                     |
| <i>MMP1</i>     | matrix metalloproteinase 1                                   |
| <i>PRKD2</i>    | protein kinase D2                                            |
| <i>BAK1</i>     | BCL2 antagonist/killer 1                                     |
| <i>PCNA</i>     | proliferating cell nuclear antigen                           |
| <i>CXCL2</i>    | C-X-C motif chemokine ligand 2                               |
| <i>HERC2</i>    | HECT and RLD domain containing E3 ubiquitin protein ligase 2 |
| <i>CARD11</i>   | caspase recruitment domain family member 11                  |
| <i>TUBA4B</i>   | tubulin alpha 4b                                             |
| <i>BTN3A3</i>   | butyrophilin subfamily 3 member A3                           |
| <i>C21orf91</i> | chromosome 21 open reading frame 91                          |

|                  |                                                           |
|------------------|-----------------------------------------------------------|
| <i>SIDT1</i>     | SID1 transmembrane family member 1                        |
| <i>FBXO6</i>     | F-box protein 6                                           |
| <i>N4BP1</i>     | NEDD4 binding protein 1                                   |
| <i>KIAA1551</i>  | KIAA1551                                                  |
| <i>CPEB2</i>     | cytoplasmic polyadenylation element binding protein 2     |
| <i>PLEK2</i>     | pleckstrin 2                                              |
| <i>VAMP5</i>     | vesicle associated membrane protein 5                     |
| <i>PCSK7</i>     | proprotein convertase subtilisin/kexin type 7             |
| <i>ATF3</i>      | activating transcription factor 3                         |
| <i>SLN</i>       | sarcolipin                                                |
| <i>TNFRSF10A</i> | TNF receptor superfamily member 10a                       |
| <i>CCR3</i>      | C-C motif chemokine receptor 3                            |
| <i>CEACAM5</i>   | carcinoembryonic antigen related cell adhesion molecule 5 |
| <i>MS4A2</i>     | membrane spanning 4-domains A2                            |
| <i>SPINK5</i>    | serine peptidase inhibitor, Kazal type 5                  |
| <i>IL4R</i>      | interleukin 4 receptor                                    |
| <i>EGFR</i>      | epidermal growth factor receptor                          |
| <i>HPSE2</i>     | heparanase 2 (inactive)                                   |
| <i>DRD4</i>      | dopamine receptor D4                                      |
| <i>DRD2</i>      | dopamine receptor D2                                      |
| <i>DRD3</i>      | dopamine receptor D3                                      |
| <i>DDC</i>       | dopa decarboxylase                                        |
| <i>HTR2C</i>     | 5-hydroxytryptamine receptor 2C                           |
| <i>ANKRD66</i>   | ankyrin repeat domain 66                                  |
| <i>NANOS1</i>    | nanos C2HC-type zinc finger 1                             |

|                 |                                                                                    |
|-----------------|------------------------------------------------------------------------------------|
| <i>CD28</i>     | CD28 molecule                                                                      |
| <i>CXCL12</i>   | C-X-C motif chemokine ligand 12                                                    |
| <i>ABI3BP</i>   | ABI family member 3 binding protein                                                |
| <i>KLF6</i>     | Kruppel like factor 6                                                              |
| <i>NPY</i>      | neuropeptide Y                                                                     |
| <i>PI3</i>      | peptidase inhibitor 3                                                              |
| <i>ANGPT2</i>   | angiopoietin 2                                                                     |
| <i>TIMP1</i>    | TIMP metallopeptidase inhibitor 1                                                  |
| <i>PSMB8</i>    | proteasome subunit beta 8                                                          |
| <i>FGF2</i>     | fibroblast growth factor 2                                                         |
| <i>IL17F</i>    | interleukin 17F                                                                    |
| <i>HEG1</i>     | heart development protein with EGF like domains 1                                  |
| <i>USP2</i>     | ubiquitin specific peptidase 2                                                     |
| <i>PSAP</i>     | prosaposin                                                                         |
| <i>ARAP2</i>    | ArfGAP with RhoGAP domain, ankyrin repeat and PH domain 2                          |
| <i>AP5B1</i>    | adaptor related protein complex 5 beta 1 subunit                                   |
| <i>RAB36</i>    | RAB36, member RAS oncogene family                                                  |
| <i>TMEM229B</i> | transmembrane protein 229B                                                         |
| <i>TMEM212</i>  | transmembrane protein 212                                                          |
| <i>C1GALT1</i>  | core 1 synthase, glycoprotein-N-acetylgalactosamine 3-beta-galactosyltransferase 1 |
| <i>JADE2</i>    | jade family PHD finger 2                                                           |
| <i>FAM135A</i>  | family with sequence similarity 135 member A                                       |
| <i>C1R</i>      | complement C1r                                                                     |
| <i>KIAA0040</i> | KIAA0040                                                                           |

|                      |                                                     |
|----------------------|-----------------------------------------------------|
| <i>SLFN5</i>         | schlafen family member 5                            |
| <i>CYB5R2</i>        | cytochrome b5 reductase 2                           |
| <i>CDC25B</i>        | cell division cycle 25B                             |
| <i>RBCK1</i>         | RANBP2-type and C3HC4-type zinc finger containing 1 |
| <i>RP11-356K23.1</i> |                                                     |
| <i>CXCL10</i>        | C-X-C motif chemokine ligand 10                     |
| <i>CD47</i>          | CD47 molecule                                       |
| <i>HIF1A</i>         | hypoxia inducible factor 1 alpha subunit            |
| <i>COL22A1</i>       | collagen type XXII alpha 1 chain                    |
| <i>SELL</i>          | selectin L                                          |
| <i>IGFBP4</i>        | insulin like growth factor binding protein 4        |
| <i>IL32</i>          | interleukin 32                                      |
| <i>AC009948.5</i>    |                                                     |
| <i>BTN3A1</i>        | butyrophilin subfamily 3 member A1                  |
| <i>SOAT1</i>         | sterol O-acyltransferase 1                          |
| <i>LY6E</i>          | lymphocyte antigen 6 complex, locus E               |
| <i>SERPING1</i>      | serpin family G member 1                            |
| <i>IL22</i>          | interleukin 22                                      |
| <i>LTB4R</i>         | leukotriene B4 receptor                             |
| <i>C15orf48</i>      | chromosome 15 open reading frame 48                 |
| <i>ALOX15</i>        | arachidonate 15-lipoxygenase                        |
| <i>TNIP3</i>         | TNFAIP3 interacting protein 3                       |
| <i>SLPI</i>          | secretory leukocyte peptidase inhibitor             |
| <i>MTFMT</i>         | mitochondrial methionyl-tRNA formyltransferase      |

|                 |                                                         |
|-----------------|---------------------------------------------------------|
| <i>EPHX1</i>    | epoxide hydrolase 1                                     |
| <i>STAT6</i>    | signal transducer and activator of transcription 6      |
| <i>EPX</i>      | eosinophil peroxidase                                   |
| <i>F2RL1</i>    | F2R like trypsin receptor 1                             |
| <i>GLCCI1</i>   | glucocorticoid induced 1                                |
| <i>GLRX</i>     | glutaredoxin                                            |
| <i>LTA4H</i>    | leukotriene A4 hydrolase                                |
| <i>PSMA6</i>    | proteasome subunit alpha 6                              |
| <i>CD40</i>     | CD40 molecule                                           |
| <i>GPT2</i>     | glutamic--pyruvic transaminase 2                        |
| <i>MARCKSL1</i> | MARCKS like 1                                           |
| <i>RNF19B</i>   | ring finger protein 19B                                 |
| <i>PELI1</i>    | pellino E3 ubiquitin protein ligase 1                   |
| <i>HK2</i>      | hexokinase 2                                            |
| <i>PARP8</i>    | poly(ADP-ribose) polymerase family member 8             |
| <i>ADAR</i>     | adenosine deaminase, RNA specific                       |
| <i>TMTC1</i>    | transmembrane and tetratricopeptide repeat containing 1 |
| <i>TBX21</i>    | T-box 21                                                |
| <i>CD34</i>     | CD34 molecule                                           |
| <i>CRP</i>      | C-reactive protein, pentraxin-related                   |
| <i>CCL17</i>    | C-C motif chemokine ligand 17                           |
| <i>TNC</i>      | tenascin C                                              |
| <i>IL21</i>     | interleukin 21                                          |
| <i>ALOX5AP</i>  | arachidonate 5-lipoxygenase activating protein          |
| <i>TNFRSF8</i>  | TNF receptor superfamily member 8                       |

|                      |                                           |
|----------------------|-------------------------------------------|
| <i>GTPBP1</i>        | GTP binding protein 1                     |
| <i>HPGDS</i>         | hematopoietic prostaglandin D synthase    |
| <i>SELP</i>          | selectin P                                |
| <i>DPP4</i>          | dipeptidyl peptidase 4                    |
| <i>TLE4</i>          | transducin like enhancer of split 4       |
| <i>CD40LG</i>        | CD40 ligand                               |
| <i>PTEN</i>          | phosphatase and tensin homolog            |
| <i>MBL2</i>          | mannose binding lectin 2                  |
| <i>CDH1</i>          | cadherin 1                                |
| <i>IL15</i>          | interleukin 15                            |
| <i>FEV</i>           | FEV, ETS transcription factor             |
| <i>IL17RB</i>        | interleukin 17 receptor B                 |
| <i>SCGB3A2</i>       | secretoglobin family 3A member 2          |
| <i>CSF3</i>          | colony stimulating factor 3               |
| <i>IL12B</i>         | interleukin 12B                           |
| <i>CTD-3128G10.7</i> |                                           |
| <i>LTC4S</i>         | leukotriene C4 synthase                   |
| <i>TCHH</i>          | trichohyalin                              |
| <i>ZFP36</i>         | ZFP36 ring finger protein                 |
| <i>AREG</i>          | amphiregulin                              |
| <i>CD276</i>         | CD276 molecule                            |
| <i>CAV1</i>          | caveolin 1                                |
| <i>SCGB1A1</i>       | secretoglobin family 1A member 1          |
| <i>PI4K2B</i>        | phosphatidylinositol 4-kinase type 2 beta |

|                 |                                                 |
|-----------------|-------------------------------------------------|
| <i>PLAT</i>     | plasminogen activator, tissue type              |
| <i>IL3</i>      | interleukin 3                                   |
| <i>KLHL5</i>    | kelch like family member 5                      |
| <i>IL37</i>     | interleukin 37                                  |
| <i>ACP2</i>     | acid phosphatase 2, lysosomal                   |
| <i>CCL24</i>    | C-C motif chemokine ligand 24                   |
| <i>SLC17A5</i>  | solute carrier family 17 member 5               |
| <i>LRRC3</i>    | leucine rich repeat containing 3                |
| <i>MMP12</i>    | matrix metalloproteinase 12                     |
| <i>TACR1</i>    | tachykinin receptor 1                           |
| <i>TMCC2</i>    | transmembrane and coiled-coil domain family 2   |
| <i>CMA1</i>     | chymase 1                                       |
| <i>VIP</i>      | vasoactive intestinal peptide                   |
| <i>CFH</i>      | complement factor H                             |
| <i>ITGB3</i>    | integrin subunit beta 3                         |
| <i>PCYT1B</i>   | phosphate cytidylyltransferase 1, choline, beta |
| <i>STS</i>      | steroid sulfatase (microsomal), isozyme S       |
| <i>ELN</i>      | elastin                                         |
| <i>SERPINF2</i> | serpin family F member 2                        |
| <i>MAPK3</i>    | mitogen-activated protein kinase 3              |
| <i>GATS</i>     | GATS, stromal antigen 3 opposite strand         |
| <i>EPHB2</i>    | EPH receptor B2                                 |
| <i>DPEP1</i>    | dipeptidase 1 (renal)                           |
| <i>CFLAR</i>    | CASP8 and FADD like apoptosis regulator         |
| <i>ACSL1</i>    | acyl-CoA synthetase long-chain family member 1  |

|                |                                                 |
|----------------|-------------------------------------------------|
| <i>ID1</i>     | inhibitor of DNA binding 1, HLH protein         |
| <i>PSMA4</i>   | proteasome subunit alpha 4                      |
| <i>RNF149</i>  | ring finger protein 149                         |
| <i>FYB</i>     | FYN binding protein                             |
| <i>KLF4</i>    | Kruppel like factor 4                           |
| <i>ID2</i>     | inhibitor of DNA binding 2, HLH protein         |
| <i>ZC3H12A</i> | zinc finger CCCH-type containing 12A            |
| <i>CTNBL1</i>  | catenin beta like 1                             |
| <i>ARL5B</i>   | ADP ribosylation factor like GTPase 5B          |
| <i>PPA1</i>    | pyrophosphatase (inorganic) 1                   |
| <i>STEAP3</i>  | STEAP3 metalloreductase                         |
| <i>SIRT1</i>   | sirtuin 1                                       |
| <i>NPPA</i>    | natriuretic peptide A                           |
| <i>EHD1</i>    | EH domain containing 1                          |
| <i>ICOS</i>    | inducible T-cell costimulator                   |
| <i>TYRP1</i>   | tyrosinase related protein 1                    |
| <i>SCARB2</i>  | scavenger receptor class B member 2             |
| <i>UTS2</i>    | urotensin 2                                     |
| <i>CXCL3</i>   | C-X-C motif chemokine ligand 3                  |
| <i>SPOCD1</i>  | SPOC domain containing 1                        |
| <i>HCAR2</i>   | hydroxycarboxylic acid receptor 2               |
| <i>CD44</i>    | CD44 molecule (Indian blood group)              |
| <i>ATP10A</i>  | ATPase phospholipid transporting 10A (putative) |
| <i>CD46</i>    | CD46 molecule                                   |
| <i>APOE</i>    | apolipoprotein E                                |

|                |                                                         |
|----------------|---------------------------------------------------------|
| <i>IL11</i>    | interleukin 11                                          |
| <i>CRH</i>     | corticotropin releasing hormone                         |
| <i>CEBPA</i>   | CCAAT/enhancer binding protein alpha                    |
| <i>HSPD1</i>   | heat shock protein family D (Hsp60) member 1            |
| <i>CFTR</i>    | cystic fibrosis transmembrane conductance regulator     |
| <i>PCDH1</i>   | protocadherin 1                                         |
| <i>CD83</i>    | CD83 molecule                                           |
| <i>HDAC9</i>   | histone deacetylase 9                                   |
| <i>CHIA</i>    | chitinase, acidic                                       |
| <i>LGALS3</i>  | galectin 3                                              |
| <i>CCR4</i>    | C-C motif chemokine receptor 4                          |
| <i>CST3</i>    | cystatin C                                              |
| <i>C3AR1</i>   | complement C3a receptor 1                               |
| <i>FCER2</i>   | Fc fragment of IgE receptor II                          |
| <i>CAT</i>     | catalase                                                |
| <i>ETS1</i>    | ETS proto-oncogene 1, transcription factor              |
| <i>UGCG</i>    | UDP-glucose ceramide glucosyltransferase                |
| <i>TLR5</i>    | toll like receptor 5                                    |
| <i>AHCYL2</i>  | adenosylhomocysteinase like 2                           |
| <i>DAB2IP</i>  | DAB2 interacting protein                                |
| <i>RBMS2</i>   | RNA binding motif single stranded interacting protein 2 |
| <i>DNAH12</i>  | dynein axonemal heavy chain 12                          |
| <i>LRIG1</i>   | leucine rich repeats and immunoglobulin like domains 1  |
| <i>TMEM268</i> | transmembrane protein 268                               |
| <i>SNTN</i>    | sentan, cilia apical structure protein                  |

|                    |                                                    |
|--------------------|----------------------------------------------------|
| <i>ARRDC3</i>      | arrestin domain containing 3                       |
| <i>TINF2</i>       | TERF1 interacting nuclear factor 2                 |
| <i>ANG</i>         | angiogenin                                         |
| <i>STAT3</i>       | signal transducer and activator of transcription 3 |
| <i>DEFB1</i>       | defensin beta 1                                    |
| <i>FAM216B</i>     | family with sequence similarity 216 member B       |
| <i>PRRT3</i>       | proline rich transmembrane protein 3               |
| <i>MMP8</i>        | matrix metalloproteinase 8                         |
| <i>IL7R</i>        | interleukin 7 receptor                             |
| <i>SMAD7</i>       | SMAD family member 7                               |
| <i>RARRES2</i>     | retinoic acid receptor responder 2                 |
| <i>IL22RA1</i>     | interleukin 22 receptor subunit alpha 1            |
| <i>ZNF841</i>      | zinc finger protein 841                            |
| <i>RP1-71H24.1</i> |                                                    |
| <i>NFE2L3</i>      | nuclear factor, erythroid 2 like 3                 |
| <i>CCR5</i>        | C-C motif chemokine receptor 5 (gene/pseudogene)   |
| <i>CMTM4</i>       | CKLF like MARVEL transmembrane domain containing 4 |
| <i>SLC16A1</i>     | solute carrier family 16 member 1                  |
| <i>PATL1</i>       | PAT1 homolog 1, processing body mRNA decay factor  |
| <i>PLXNA2</i>      | plexin A2                                          |
| <i>NCF1C</i>       | neutrophil cytosolic factor 1C pseudogene          |
| <i>CYSLTR2</i>     | cysteinyl leukotriene receptor 2                   |
| <i>ALPL</i>        | alkaline phosphatase, liver/bone/kidney            |
| <i>TRIM26</i>      | tripartite motif containing 26                     |
| <i>ADAM12</i>      | ADAM metalloproteinase domain 12                   |

|                 |                                                                 |
|-----------------|-----------------------------------------------------------------|
| <i>TIMD4</i>    | T-cell immunoglobulin and mucin domain containing 4             |
| <i>JUNB</i>     | JunB proto-oncogene, AP-1 transcription factor subunit          |
| <i>ENO1</i>     | enolase 1                                                       |
| <i>KYNU</i>     | kynureninase                                                    |
| <i>NFE2L2</i>   | nuclear factor, erythroid 2 like 2                              |
| <i>RPL17</i>    | ribosomal protein L17                                           |
| <i>TPT1</i>     | tumor protein, translationally-controlled 1                     |
| <i>APOA1</i>    | apolipoprotein A1                                               |
| <i>NTRK1</i>    | neurotrophic receptor tyrosine kinase 1                         |
| <i>SELE</i>     | selectin E                                                      |
| <i>PECAM1</i>   | platelet and endothelial cell adhesion molecule 1               |
| <i>FAM65B</i>   | family with sequence similarity 65 member B                     |
| <i>ARG1</i>     | arginase 1                                                      |
| <i>LTF</i>      | lactotransferrin                                                |
| <i>CCL7</i>     | C-C motif chemokine ligand 7                                    |
| <i>CASP10</i>   | caspase 10                                                      |
| <i>XPR1</i>     | xenotropic and polytropic retrovirus receptor 1                 |
| <i>CASP8</i>    | caspase 8                                                       |
| <i>NAMPT</i>    | nicotinamide phosphoribosyltransferase                          |
| <i>ARID3B</i>   | AT-rich interaction domain 3B                                   |
| <i>AQP5</i>     | aquaporin 5                                                     |
| <i>SCIN</i>     | scinderin                                                       |
| <i>AGR2</i>     | anterior gradient 2, protein disulphide isomerase family member |
| <i>ANPEP</i>    | alanyl aminopeptidase, membrane                                 |
| <i>SERPINB3</i> | serpin family B member 3                                        |

|                |                                                                                                      |
|----------------|------------------------------------------------------------------------------------------------------|
| <i>CYBA</i>    | cytochrome b-245 alpha chain                                                                         |
| <i>CCL18</i>   | C-C motif chemokine ligand 18                                                                        |
| <i>ATG3</i>    | autophagy related 3                                                                                  |
| <i>FAS</i>     | Fas cell surface death receptor                                                                      |
| <i>CALCA</i>   | calcitonin related polypeptide alpha                                                                 |
| <i>SLC26A9</i> | solute carrier family 26 member 9                                                                    |
| <i>PAICS</i>   | phosphoribosylaminoimidazole carboxylase;<br>phosphoribosylaminoimidazolesuccinocarboxamide synthase |
| <i>NOD1</i>    | nucleotide binding oligomerization domain containing 1                                               |
| <i>SMS</i>     | spermine synthase                                                                                    |
| <i>CLCA1</i>   | chloride channel accessory 1                                                                         |
| <i>BATF</i>    | basic leucine zipper ATF-like transcription factor                                                   |
| <i>REN</i>     | renin                                                                                                |
| <i>SEMA3A</i>  | semaphorin 3A                                                                                        |
| <i>LRRN1</i>   | leucine rich repeat neuronal 1                                                                       |
| <i>SLC26A4</i> | solute carrier family 26 member 4                                                                    |
| <i>OMG</i>     | oligodendrocyte myelin glycoprotein                                                                  |
| <i>VCAM1</i>   | vascular cell adhesion molecule 1                                                                    |
| <i>GSTA1</i>   | glutathione S-transferase alpha 1                                                                    |
| <i>STAT4</i>   | signal transducer and activator of transcription 4                                                   |
| <i>IL5RA</i>   | interleukin 5 receptor subunit alpha                                                                 |
| <i>ACTB</i>    | actin beta                                                                                           |
| <i>RAPGEF5</i> | Rap guanine nucleotide exchange factor 5                                                             |
| <i>ITK</i>     | IL2 inducible T-cell kinase                                                                          |
| <i>BRD1</i>    | bromodomain containing 1                                                                             |

|                |                                                                            |
|----------------|----------------------------------------------------------------------------|
| <i>IGFBP3</i>  | insulin like growth factor binding protein 3                               |
| <i>S100A12</i> | S100 calcium binding protein A12                                           |
| <i>SLURP1</i>  | secreted LY6/PLAUR domain containing 1                                     |
| <i>NAT2</i>    | N-acetyltransferase 2                                                      |
| <i>PTPRH</i>   | protein tyrosine phosphatase, receptor type H                              |
| <i>FYTTD1</i>  | forty-two-three domain containing 1                                        |
| <i>CCDC113</i> | coiled-coil domain containing 113                                          |
| <i>RANGAP1</i> | Ran GTPase activating protein 1                                            |
| <i>DCP1A</i>   | decapping mRNA 1A                                                          |
| <i>NADK</i>    | NAD kinase                                                                 |
| <i>PSME2</i>   | proteasome activator subunit 2                                             |
| <i>SMCHD1</i>  | structural maintenance of chromosomes flexible hinge domain containing 1   |
| <i>WDR38</i>   | WD repeat domain 38                                                        |
| <i>CSTB</i>    | cystatin B                                                                 |
| <i>NUDT4</i>   | nudix hydrolase 4                                                          |
| <i>TOP1</i>    | topoisomerase (DNA) I                                                      |
| <i>SLC27A3</i> | solute carrier family 27 member 3                                          |
| <i>PLA2G1B</i> | phospholipase A2 group IB                                                  |
| <i>NOS3</i>    | nitric oxide synthase 3                                                    |
| <i>NROB2</i>   | nuclear receptor subfamily 0 group B member 2                              |
| <i>MGAT3</i>   | mannosyl (beta-1,4-)-glycoprotein beta-1,4-N-acetylglucosaminyltransferase |
| <i>OVOL1</i>   | ovo like transcriptional repressor 1                                       |
| <i>IL17D</i>   | interleukin 17D                                                            |
| <i>AQP1</i>    | aquaporin 1 (Colton blood group)                                           |
| <i>LAT</i>     | linker for activation of T-cells                                           |

|                 |                                                           |
|-----------------|-----------------------------------------------------------|
| <i>PF4</i>      | platelet factor 4                                         |
| <i>TUBA1A</i>   | tubulin alpha 1a                                          |
| <i>HDX</i>      | highly divergent homeobox                                 |
| <i>ASS1</i>     | argininosuccinate synthase 1                              |
| <i>SNX6</i>     | sorting nexin 6                                           |
| <i>CBX5</i>     | chromobox 5                                               |
| <i>RIN2</i>     | Ras and Rab interactor 2                                  |
| <i>CHST6</i>    | carbohydrate sulfotransferase 6                           |
| <i>CHAC2</i>    | ChaC cation transport regulator homolog 2                 |
| <i>OSR2</i>     | odd-skipped related transcription factor 2                |
| <i>CD27</i>     | CD27 molecule                                             |
| <i>DNAL1</i>    | dynein axonemal light chain 1                             |
| <i>ACKR4</i>    | atypical chemokine receptor 4                             |
| <i>ITGB4</i>    | integrin subunit beta 4                                   |
| <i>IL13RA1</i>  | interleukin 13 receptor subunit alpha 1                   |
| <i>TNFRSF18</i> | TNF receptor superfamily member 18                        |
| <i>FASLG</i>    | Fas ligand                                                |
| <i>NOTCH1</i>   | notch 1                                                   |
| <i>MYLK</i>     | myosin light chain kinase                                 |
| <i>ACHE</i>     | acetylcholinesterase (Cartwright blood group)             |
| <i>SERPINB7</i> | serpin family B member 7                                  |
| <i>ITIH6</i>    | inter-alpha-trypsin inhibitor heavy chain family member 6 |
| <i>HCAR3</i>    | hydroxycarboxylic acid receptor 3                         |
| <i>GSTO2</i>    | glutathione S-transferase omega 2                         |
| <i>FGFBP2</i>   | fibroblast growth factor binding protein 2                |

|                 |                                                       |
|-----------------|-------------------------------------------------------|
| <i>GRAMD1B</i>  | GRAM domain containing 1B                             |
| <i>MKLN1</i>    | muskelin 1                                            |
| <i>CLCA3P</i>   | chloride channel accessory 3, pseudogene              |
| <i>MARCKS</i>   | myristoylated alanine rich protein kinase C substrate |
| <i>HAO1</i>     | hydroxyacid oxidase 1                                 |
| <i>CCL3</i>     | C-C motif chemokine ligand 3                          |
| <i>CR1</i>      | complement C3b/C4b receptor 1 (Knops blood group)     |
| <i>RGS22</i>    | regulator of G-protein signaling 22                   |
| <i>ITGB2</i>    | integrin subunit beta 2                               |
| <i>ARRB2</i>    | arrestin beta 2                                       |
| <i>CRTAM</i>    | cytotoxic and regulatory T-cell molecule              |
| <i>PRKCA</i>    | protein kinase C alpha                                |
| <i>S100A8</i>   | S100 calcium binding protein A8                       |
| <i>DYNC2H1</i>  | dynein cytoplasmic 2 heavy chain 1                    |
| <i>TPI1</i>     | triosephosphate isomerase 1                           |
| <i>SPESP1</i>   | sperm equatorial segment protein 1                    |
| <i>KIF3A</i>    | kinesin family member 3A                              |
| <i>EDARADD</i>  | EDAR associated death domain                          |
| <i>RTKN2</i>    | rhotekin 2                                            |
| <i>CX3CR1</i>   | C-X3-C motif chemokine receptor 1                     |
| <i>ANGPT1</i>   | angiopoietin 1                                        |
| <i>IGSF3</i>    | immunoglobulin superfamily member 3                   |
| <i>OSM</i>      | oncostatin M                                          |
| <i>CCL20</i>    | C-C motif chemokine ligand 20                         |
| <i>SERPINA1</i> | serpin family A member 1                              |

|                |                                                  |
|----------------|--------------------------------------------------|
| <i>NLRP1</i>   | NLR family pyrin domain containing 1             |
| <i>CHM</i>     | CHM, Rab escort protein 1                        |
| <i>ENTPD1</i>  | ectonucleoside triphosphate diphosphohydrolase 1 |
| <i>CXCR4</i>   | C-X-C motif chemokine receptor 4                 |
| <i>CXCR3</i>   | C-X-C motif chemokine receptor 3                 |
| <i>FBXL7</i>   | F-box and leucine rich repeat protein 7          |
| <i>APH1B</i>   | aph-1 homolog B, gamma-secretase subunit         |
| <i>DCLK1</i>   | doublecortin like kinase 1                       |
| <i>S100A9</i>  | S100 calcium binding protein A9                  |
| <i>TTC39B</i>  | tetratricopeptide repeat domain 39B              |
| <i>TLR6</i>    | toll like receptor 6                             |
| <i>PLAU</i>    | plasminogen activator, urokinase                 |
| <i>PGF</i>     | placental growth factor                          |
| <i>DNAH6</i>   | dynein axonemal heavy chain 6                    |
| <i>SNPH</i>    | syntaphilin                                      |
| <i>NPS</i>     | neuropeptide S                                   |
| <i>GH1</i>     | growth hormone 1                                 |
| <i>UNC119B</i> | unc-119 lipid binding chaperone B                |
| <i>MTMR11</i>  | myotubularin related protein 11                  |
| <i>CFAP221</i> | cilia and flagella associated protein 221        |
| <i>COL1A1</i>  | collagen type I alpha 1 chain                    |
| <i>LPA</i>     | lipoprotein(a)                                   |
| <i>GAPDH</i>   | glyceraldehyde-3-phosphate dehydrogenase         |
| <i>RAB8B</i>   | RAB8B, member RAS oncogene family                |
| <i>MED28</i>   | mediator complex subunit 28                      |

|                     |                                                            |
|---------------------|------------------------------------------------------------|
| <i>TBCC</i>         | tubulin folding cofactor C                                 |
| <i>PTPRC</i>        | protein tyrosine phosphatase, receptor type C              |
| <i>PEPD</i>         | peptidase D                                                |
| <i>COLCA1</i>       | colorectal cancer associated 1                             |
| <i>HLA-G</i>        | major histocompatibility complex, class I, G               |
| <i>CCL28</i>        | C-C motif chemokine ligand 28                              |
| <i>RP11-430C7.5</i> |                                                            |
| <i>ESR1</i>         | estrogen receptor 1                                        |
| <i>SLCO6A1</i>      | solute carrier organic anion transporter family member 6A1 |
| <i>MMP2</i>         | matrix metalloproteinase 2                                 |
| <i>CTNNA3</i>       | catenin alpha 3                                            |
| <i>HNMT</i>         | histamine N-methyltransferase                              |
| <i>IRF4</i>         | interferon regulatory factor 4                             |
| <i>CCR1</i>         | C-C motif chemokine receptor 1                             |
| <i>TACR2</i>        | tachykinin receptor 2                                      |
| <i>TNFAIP8L2</i>    | TNF alpha induced protein 8 like 2                         |
| <i>PARP1</i>        | poly(ADP-ribose) polymerase 1                              |
| <i>MOGAT1</i>       | monoacylglycerol O-acyltransferase 1                       |
| <i>ADM</i>          | adrenomedullin                                             |
| <i>MAP1B</i>        | microtubule associated protein 1B                          |
| <i>AMELX</i>        | amelogenin, X-linked                                       |
| <i>HLX</i>          | H2.0 like homeobox                                         |
| <i>BBC3</i>         | BCL2 binding component 3                                   |
| <i>CD69</i>         | CD69 molecule                                              |

|                 |                                                                  |
|-----------------|------------------------------------------------------------------|
| <i>SLC16A4</i>  | solute carrier family 16 member 4                                |
| <i>HPSE</i>     | heparanase                                                       |
| <i>ANXA1</i>    | annexin A1                                                       |
| <i>CYP3A4</i>   | cytochrome P450 family 3 subfamily A member 4                    |
| <i>TFDP2</i>    | transcription factor Dp-2                                        |
| <i>ATF5</i>     | activating transcription factor 5                                |
| <i>LEPR</i>     | leptin receptor                                                  |
| <i>THSD1</i>    | thrombospondin type 1 domain containing 1                        |
| <i>TRPV2</i>    | transient receptor potential cation channel subfamily V member 2 |
| <i>TNFRSF6B</i> | TNF receptor superfamily member 6b                               |
| <i>SLAMF7</i>   | SLAM family member 7                                             |
| <i>CADM1</i>    | cell adhesion molecule 1                                         |
| <i>INSRR</i>    | insulin receptor related receptor                                |
| <i>ADAM28</i>   | ADAM metallopeptidase domain 28                                  |
| <i>ZNF107</i>   | zinc finger protein 107                                          |
| <i>RGS2</i>     | regulator of G-protein signaling 2                               |
| <i>LCN2</i>     | lipocalin 2                                                      |
| <i>STAT5A</i>   | signal transducer and activator of transcription 5A              |
| <i>ARPP21</i>   | cAMP regulated phosphoprotein 21                                 |
| <i>RBP4</i>     | retinol binding protein 4                                        |
| <i>CFL1</i>     | cofilin 1                                                        |
| <i>UCN</i>      | urocortin                                                        |
| <i>AOAH</i>     | acyloxyacyl hydrolase                                            |
| <i>VASP</i>     | vasodilator-stimulated phosphoprotein                            |
| <i>ZBTB43</i>   | zinc finger and BTB domain containing 43                         |

|                 |                                                                  |
|-----------------|------------------------------------------------------------------|
| <i>FCER1A</i>   | Fc fragment of IgE receptor 1a                                   |
| <i>SERPINA3</i> | serpin family A member 3                                         |
| <i>GRAMD2</i>   | GRAM domain containing 2                                         |
| <i>CSF1</i>     | colony stimulating factor 1                                      |
| <i>WFDC21P</i>  | WAP four-disulfide core domain 21, pseudogene                    |
| <i>EPS8L1</i>   | EPS8 like 1                                                      |
| <i>NQO1</i>     | NAD(P)H quinone dehydrogenase 1                                  |
| <i>VTN</i>      | vitronectin                                                      |
| <i>ACE</i>      | angiotensin I converting enzyme                                  |
| <i>HDAC2</i>    | histone deacetylase 2                                            |
| <i>C5AR1</i>    | complement C5a receptor 1                                        |
| <i>SYT1</i>     | synaptotagmin 1                                                  |
| <i>SERPINE2</i> | serpin family E member 2                                         |
| <i>NLRP3</i>    | NLR family pyrin domain containing 3                             |
| <i>CD177</i>    | CD177 molecule                                                   |
| <i>HP</i>       | haptoglobin                                                      |
| <i>TPO</i>      | thyroid peroxidase                                               |
| <i>TRPM2</i>    | transient receptor potential cation channel subfamily M member 2 |
| <i>RAMP1</i>    | receptor activity modifying protein 1                            |
| <i>CCR2</i>     | C-C motif chemokine receptor 2                                   |
| <i>IL7</i>      | interleukin 7                                                    |
| <i>ANO7L1</i>   | anoctamin 7 like 1                                               |
| <i>THUMP2</i>   | THUMP domain containing 2                                        |
| <i>LAMA1</i>    | laminin subunit alpha 1                                          |
| <i>ITGB1</i>    | integrin subunit beta 1                                          |

|                      |                                               |
|----------------------|-----------------------------------------------|
| <i>FN1</i>           | fibronectin 1                                 |
| <i>IL12A</i>         | interleukin 12A                               |
| <i>CCDC33</i>        | coiled-coil domain containing 33              |
| <i>CCR6</i>          | C-C motif chemokine receptor 6                |
| <i>TLR9</i>          | toll like receptor 9                          |
| <i>MSRB2</i>         | methionine sulfoxide reductase B2             |
| <i>CYP2R1</i>        | cytochrome P450 family 2 subfamily R member 1 |
| <i>TAC1</i>          | tachykinin precursor 1                        |
| <i>RGS4</i>          | regulator of G-protein signaling 4            |
| <i>CCR9</i>          | C-C motif chemokine receptor 9                |
| <i>AICDA</i>         | activation induced cytidine deaminase         |
| <i>RP11-327F22.1</i> |                                               |
| <i>FKBP1B</i>        | FK506 binding protein 1B                      |
| <i>SAA1</i>          | serum amyloid A1                              |
| <i>IL1R2</i>         | interleukin 1 receptor type 2                 |
| <i>PRDM1</i>         | PR/SET domain 1                               |
| <i>CLDN18</i>        | claudin 18                                    |
| <i>HDAC1</i>         | histone deacetylase 1                         |
| <i>NELFCD</i>        | negative elongation factor complex member C/D |
| <i>PNOC</i>          | prepronociceptin                              |
| <i>NF2</i>           | neurofibromin 2                               |
| <i>HTR4</i>          | 5-hydroxytryptamine receptor 4                |
| <i>SELPLG</i>        | selectin P ligand                             |
| <i>CENPJ</i>         | centromere protein J                          |

|                       |                                                                                                       |
|-----------------------|-------------------------------------------------------------------------------------------------------|
| <i>RP11-1008C21.1</i> |                                                                                                       |
| <i>ATP5A1P10</i>      | ATP synthase, H <sup>+</sup> transporting, mitochondrial F1 complex, alpha subunit 1<br>pseudogene 10 |
| <i>KCNMB2</i>         | potassium calcium-activated channel subfamily M regulatory beta subunit 2                             |
| <i>DUSP26</i>         | dual specificity phosphatase 26 (putative)                                                            |
| <i>PPY</i>            | pancreatic polypeptide                                                                                |
| <i>CD151</i>          | CD151 molecule (Raph blood group)                                                                     |
| <i>CCL3L3</i>         | C-C motif chemokine ligand 3 like 3                                                                   |
| <i>KRT18</i>          | keratin 18                                                                                            |
| <i>PGP</i>            | phosphoglycolate phosphatase                                                                          |
| <i>C1orf100</i>       | chromosome 1 open reading frame 100                                                                   |
| <i>CCDC190</i>        | coiled-coil domain containing 190                                                                     |
| <i>TENM3</i>          | teneurin transmembrane protein 3                                                                      |
| <i>ELF5</i>           | E74 like ETS transcription factor 5                                                                   |
| <i>SLC6A12</i>        | solute carrier family 6 member 12                                                                     |
| <i>BGLAP</i>          | bone gamma-carboxyglutamate protein                                                                   |
| <i>PAPPA</i>          | pappalysin 1                                                                                          |
| <i>PPIL6</i>          | peptidylprolyl isomerase like 6                                                                       |
| <i>TMEM27</i>         | transmembrane protein 27                                                                              |
| <i>MME</i>            | membrane metalloendopeptidase                                                                         |
| <i>A2M</i>            | alpha-2-macroglobulin                                                                                 |
| <i>CDH17</i>          | cadherin 17                                                                                           |
| <i>IRF5</i>           | interferon regulatory factor 5                                                                        |
| <i>FOXA2</i>          | forkhead box A2                                                                                       |

|                 |                                                                                                                              |
|-----------------|------------------------------------------------------------------------------------------------------------------------------|
| <i>COL26A1</i>  | collagen type XXVI alpha 1 chain                                                                                             |
| <i>CHRNA1</i>   | cholinergic receptor nicotinic alpha 1 subunit                                                                               |
| <i>TNFRSF9</i>  | TNF receptor superfamily member 9                                                                                            |
| <i>PTGIR</i>    | prostaglandin I2 (prostacyclin) receptor (IP)                                                                                |
| <i>PPARGC1B</i> | PPARG coactivator 1 beta                                                                                                     |
| <i>GUCA2A</i>   | guanylate cyclase activator 2A                                                                                               |
| <i>TRPA1</i>    | transient receptor potential cation channel subfamily A member 1                                                             |
| <i>CLN3</i>     | CLN3, battenin                                                                                                               |
| <i>UBXN10</i>   | UBX domain protein 10                                                                                                        |
| <i>ABO</i>      | ABO blood group (transferase A, alpha 1-3-N-acetylgalactosaminyltransferase; transferase B, alpha 1-3-galactosyltransferase) |
| <i>TET1</i>     | tet methylcytosine dioxygenase 1                                                                                             |
| <i>CSF1R</i>    | colony stimulating factor 1 receptor                                                                                         |
| <i>TXN</i>      | thioredoxin                                                                                                                  |
| <i>IL1R1</i>    | interleukin 1 receptor type 1                                                                                                |
| <i>RECK</i>     | reversion inducing cysteine rich protein with kazal motifs                                                                   |
| <i>GAS1</i>     | growth arrest specific 1                                                                                                     |
| <i>ATPAF1</i>   | ATP synthase mitochondrial F1 complex assembly factor 1                                                                      |
| <i>LGALS7B</i>  | galectin 7B                                                                                                                  |
| <i>TIMP2</i>    | TIMP metalloproteinase inhibitor 2                                                                                           |
| <i>PAX5</i>     | paired box 5                                                                                                                 |
| <i>RBM45</i>    | RNA binding motif protein 45                                                                                                 |
| <i>PTAFR</i>    | platelet activating factor receptor                                                                                          |
| <i>LTB</i>      | lymphotoxin beta                                                                                                             |
| <i>FST</i>      | follistatin                                                                                                                  |

|                  |                                               |
|------------------|-----------------------------------------------|
| <i>NPTX1</i>     | neuronal pentraxin 1                          |
| <i>GC</i>        | GC, vitamin D binding protein                 |
| <i>TFF2</i>      | trefoil factor 2                              |
| <i>SPRR2B</i>    | small proline rich protein 2B                 |
| <i>CCR7</i>      | C-C motif chemokine receptor 7                |
| <i>ATG5</i>      | autophagy related 5                           |
| <i>NEK10</i>     | NIMA related kinase 10                        |
| <i>NDUFAB1</i>   | NADH:ubiquinone oxidoreductase subunit AB1    |
| <i>ANXA5</i>     | annexin A5                                    |
| <i>DUSP1</i>     | dual specificity phosphatase 1                |
| <i>TNFRSF13B</i> | TNF receptor superfamily member 13B           |
| <i>GPX1</i>      | glutathione peroxidase 1                      |
| <i>C7orf49</i>   | chromosome 7 open reading frame 49            |
| <i>CSH1</i>      | chorionic somatomammotropin hormone 1         |
| <i>MCAT</i>      | malonyl-CoA-acyl carrier protein transacylase |
| <i>GPR35</i>     | G protein-coupled receptor 35                 |
| <i>PMCH</i>      | pro-melanin concentrating hormone             |
| <i>SH3PXD2A</i>  | SH3 and PX domains 2A                         |
| <i>CLSTN1</i>    | calsyntenin 1                                 |
| <i>SCRT1</i>     | scratch family transcriptional repressor 1    |
| <i>DCBLD2</i>    | discoidin, CUB and LCCL domain containing 2   |
| <i>CHRM2</i>     | cholinergic receptor muscarinic 2             |
| <i>KRT19</i>     | keratin 19                                    |
| <i>TP73</i>      | tumor protein p73                             |
| <i>GJA1</i>      | gap junction protein alpha 1                  |

|                 |                                                                        |
|-----------------|------------------------------------------------------------------------|
| <i>KATNAL1</i>  | katanin catalytic subunit A1 like 1                                    |
| <i>TNFRSF19</i> | TNF receptor superfamily member 19                                     |
| <i>MMP3</i>     | matrix metalloproteinase 3                                             |
| <i>F5</i>       | coagulation factor V                                                   |
| <i>HELB</i>     | DNA helicase B                                                         |
| <i>LIFR-AS1</i> | LIFR antisense RNA 1                                                   |
| <i>NOD2</i>     | nucleotide binding oligomerization domain containing 2                 |
| <i>LDLR</i>     | low density lipoprotein receptor                                       |
| <i>MAF</i>      | MAF bZIP transcription factor                                          |
| <i>TFPI</i>     | tissue factor pathway inhibitor                                        |
| <i>MUC19</i>    | mucin 19, oligomeric                                                   |
| <i>SIGLEC8</i>  | sialic acid binding Ig like lectin 8                                   |
| <i>LPAR6</i>    | lysophosphatidic acid receptor 6                                       |
| <i>PIK3CD</i>   | phosphatidylinositol-4,5-bisphosphate 3-kinase catalytic subunit delta |
| <i>MTHFR</i>    | methylenetetrahydrofolate reductase                                    |
| <i>C1S</i>      | complement C1s                                                         |
| <i>IL17RA</i>   | interleukin 17 receptor A                                              |
| <i>CRHR2</i>    | corticotropin releasing hormone receptor 2                             |
| <i>CXCR5</i>    | C-X-C motif chemokine receptor 5                                       |
| <i>NOX4</i>     | NADPH oxidase 4                                                        |
| <i>UBE3C</i>    | ubiquitin protein ligase E3C                                           |
| <i>ADGRA3</i>   | adhesion G protein-coupled receptor A3                                 |
| <i>C5AR2</i>    | complement component 5a receptor 2                                     |
| <i>HSP90AB1</i> | heat shock protein 90 alpha family class B member 1                    |
| <i>HGF</i>      | hepatocyte growth factor                                               |

|                  |                                                                  |
|------------------|------------------------------------------------------------------|
| <i>IL16</i>      | interleukin 16                                                   |
| <i>FCRL3</i>     | Fc receptor like 3                                               |
| <i>RBM24</i>     | RNA binding motif protein 24                                     |
| <i>MUC5B</i>     | mucin 5B, oligomeric mucus/gel-forming                           |
| <i>DHRS4-AS1</i> | DHRS4 antisense RNA 1                                            |
| <i>FLG</i>       | filaggrin                                                        |
| <i>CYBB</i>      | cytochrome b-245 beta chain                                      |
| <i>CTSS</i>      | cathepsin S                                                      |
| <i>CDA</i>       | cytidine deaminase                                               |
| <i>IER2</i>      | immediate early response 2                                       |
| <i>NPR1</i>      | natriuretic peptide receptor 1                                   |
| <i>GZMB</i>      | granzyme B                                                       |
| <i>PPARGC1A</i>  | PPARG coactivator 1 alpha                                        |
| <i>HRH2</i>      | histamine receptor H2                                            |
| <i>MAP6</i>      | microtubule associated protein 6                                 |
| <i>ARHGAP24</i>  | Rho GTPase activating protein 24                                 |
| <i>PDIA3</i>     | protein disulfide isomerase family A member 3                    |
| <i>FOXE1</i>     | forkhead box E1                                                  |
| <i>HS3ST3A1</i>  | heparan sulfate-glucosamine 3-sulfotransferase 3A1               |
| <i>VWF</i>       | von Willebrand factor                                            |
| <i>ARID5A</i>    | AT-rich interaction domain 5A                                    |
| <i>AK7</i>       | adenylate kinase 7                                               |
| <i>C1orf174</i>  | chromosome 1 open reading frame 174                              |
| <i>NFATC1</i>    | nuclear factor of activated T-cells 1                            |
| <i>TRPM6</i>     | transient receptor potential cation channel subfamily M member 6 |

|                   |                                                                   |
|-------------------|-------------------------------------------------------------------|
| <i>RORC</i>       | RAR related orphan receptor C                                     |
| <i>NOCT</i>       | nocturnin                                                         |
| <i>PSMB10</i>     | proteasome subunit beta 10                                        |
| <i>PIM3</i>       | Pim-3 proto-oncogene, serine/threonine kinase                     |
| <i>SOCS2</i>      | suppressor of cytokine signaling 2                                |
| <i>ISLR2</i>      | immunoglobulin superfamily containing leucine rich repeat 2       |
| <i>ITGB7</i>      | integrin subunit beta 7                                           |
| <i>HAVCR2</i>     | hepatitis A virus cellular receptor 2                             |
| <i>AC011997.1</i> |                                                                   |
| <i>PDZRN4</i>     | PDZ domain containing ring finger 4                               |
| <i>ALB</i>        | albumin                                                           |
| <i>LRRN2</i>      | leucine rich repeat neuronal 2                                    |
| <i>MRC1</i>       | mannose receptor, C type 1                                        |
| <i>TNFSF9</i>     | tumor necrosis factor superfamily member 9                        |
| <i>STIM1</i>      | stromal interaction molecule 1                                    |
| <i>NEDD9</i>      | neural precursor cell expressed, developmentally down-regulated 9 |
| <i>IFNA2</i>      | interferon alpha 2                                                |
| <i>FABP5</i>      | fatty acid binding protein 5                                      |
| <i>SMAD2</i>      | SMAD family member 2                                              |
| <i>CRHR1</i>      | corticotropin releasing hormone receptor 1                        |
| <i>CYP1A2</i>     | cytochrome P450 family 1 subfamily A member 2                     |
| <i>PPARA</i>      | peroxisome proliferator activated receptor alpha                  |
| <i>EHF</i>        | ETS homologous factor                                             |
| <i>CCL15</i>      | C-C motif chemokine ligand 15                                     |
| <i>CA10</i>       | carbonic anhydrase 10                                             |

|                  |                                                                      |
|------------------|----------------------------------------------------------------------|
| <i>BIRC5</i>     | baculoviral IAP repeat containing 5                                  |
| <i>FOXN1</i>     | forkhead box N1                                                      |
| <i>MFAP4</i>     | microfibrillar associated protein 4                                  |
| <i>DMTN</i>      | dematin actin binding protein                                        |
| <i>EFCAB1</i>    | EF-hand calcium binding domain 1                                     |
| <i>ADCYAP1R1</i> | ADCYAP receptor type I                                               |
| <i>ANKUB1</i>    | ankyrin repeat and ubiquitin domain containing 1                     |
| <i>EFHB</i>      | EF-hand domain family member B                                       |
| <i>GSN</i>       | gelsolin                                                             |
| <i>ITCH</i>      | itchy E3 ubiquitin protein ligase                                    |
| <i>SLC6A7</i>    | solute carrier family 6 member 7                                     |
| <i>BMP7</i>      | bone morphogenetic protein 7                                         |
| <i>ADCY9</i>     | adenylate cyclase 9                                                  |
| <i>CASP3</i>     | caspase 3                                                            |
| <i>SLCO4A1</i>   | solute carrier organic anion transporter family member 4A1           |
| <i>LRRC10B</i>   | leucine rich repeat containing 10B                                   |
| <i>RYR2</i>      | ryanodine receptor 2                                                 |
| <i>HAPLN3</i>    | hyaluronan and proteoglycan link protein 3                           |
| <i>PTPN11</i>    | protein tyrosine phosphatase, non-receptor type 11                   |
| <i>EFHC2</i>     | EF-hand domain containing 2                                          |
| <i>NWD1</i>      | NACHT and WD repeat domain containing 1                              |
| <i>MMS22L</i>    | MMS22 like, DNA repair protein                                       |
| <i>USP30-AS1</i> | USP30 antisense RNA 1                                                |
| <i>FSIP1</i>     | fibrous sheath interacting protein 1                                 |
| <i>LRTOMT</i>    | leucine rich transmembrane and O-methyltransferase domain containing |

|                      |                                                              |
|----------------------|--------------------------------------------------------------|
| <i>ICOSLG</i>        | inducible T-cell costimulator ligand                         |
| <i>BDKRB2</i>        | bradykinin receptor B2                                       |
| <i>ST8SIA4</i>       | ST8 alpha-N-acetyl-neuraminide alpha-2,8-sialyltransferase 4 |
| <i>TACR3</i>         | tachykinin receptor 3                                        |
| <i>CERK</i>          | ceramide kinase                                              |
| <i>CHIT1</i>         | chitinase 1                                                  |
| <i>JUN</i>           | Jun proto-oncogene, AP-1 transcription factor subunit        |
| <i>ELANE</i>         | elastase, neutrophil expressed                               |
| <i>SLC25A3</i>       | solute carrier family 25 member 3                            |
| <i>CYP2C19</i>       | cytochrome P450 family 2 subfamily C member 19               |
| <i>MBTPS1</i>        | membrane bound transcription factor peptidase, site 1        |
| <i>TXNIP</i>         | thioredoxin interacting protein                              |
| <i>SRD5A2</i>        | steroid 5 alpha-reductase 2                                  |
| <i>RGS5</i>          | regulator of G-protein signaling 5                           |
| <i>RP11-467J12.4</i> |                                                              |
| <i>MAG</i>           | myelin associated glycoprotein                               |
| <i>C7orf26</i>       | chromosome 7 open reading frame 26                           |
| <i>CXCL13</i>        | C-X-C motif chemokine ligand 13                              |
| <i>ID3</i>           | inhibitor of DNA binding 3, HLH protein                      |
| <i>ZBTB16</i>        | zinc finger and BTB domain containing 16                     |
| <i>STX2</i>          | syntaxin 2                                                   |
| <i>IL9R</i>          | interleukin 9 receptor                                       |
| <i>ID4</i>           | inhibitor of DNA binding 4, HLH protein                      |
| <i>ADAM10</i>        | ADAM metallopeptidase domain 10                              |

|                  |                                                |
|------------------|------------------------------------------------|
| <i>FZD8</i>      | frizzled class receptor 8                      |
| <i>CYP1A1</i>    | cytochrome P450 family 1 subfamily A member 1  |
| <i>JAK3</i>      | Janus kinase 3                                 |
| <i>WISP1</i>     | WNT1 inducible signaling pathway protein 1     |
| <i>ECT2L</i>     | epithelial cell transforming 2 like            |
| <i>MORN5</i>     | MORN repeat containing 5                       |
| <i>FYN</i>       | FYN proto-oncogene, Src family tyrosine kinase |
| <i>04-Sep</i>    | septin 4                                       |
| <i>CP</i>        | ceruloplasmin                                  |
| <i>CDON</i>      | cell adhesion associated, oncogene regulated   |
| <i>CASP9</i>     | caspase 9                                      |
| <i>ORM1</i>      | orosomuroid 1                                  |
| <i>C17orf67</i>  | chromosome 17 open reading frame 67            |
| <i>MEFV</i>      | Mediterranean fever                            |
| <i>PON1</i>      | paraoxonase 1                                  |
| <i>PRKCE</i>     | protein kinase C epsilon                       |
| <i>IL13RA2</i>   | interleukin 13 receptor subunit alpha 2        |
| <i>ZNF614</i>    | zinc finger protein 614                        |
| <i>NFKB2</i>     | nuclear factor kappa B subunit 2               |
| <i>SOCS5</i>     | suppressor of cytokine signaling 5             |
| <i>IL2RA</i>     | interleukin 2 receptor subunit alpha           |
| <i>DCN</i>       | decorin                                        |
| <i>CHRM1</i>     | cholinergic receptor muscarinic 1              |
| <i>DTNA</i>      | dystrobrevin alpha                             |
| <i>LINC00094</i> | long intergenic non-protein coding RNA 94      |

|                   |                                                                          |
|-------------------|--------------------------------------------------------------------------|
| <i>HSD11B2</i>    | hydroxysteroid 11-beta dehydrogenase 2                                   |
| <i>MIF</i>        | macrophage migration inhibitory factor (glycosylation-inhibiting factor) |
| <i>PGD</i>        | phosphogluconate dehydrogenase                                           |
| <i>AMH</i>        | anti-Mullerian hormone                                                   |
| <i>DBH</i>        | dopamine beta-hydroxylase                                                |
| <i>RAPGEF3</i>    | Rap guanine nucleotide exchange factor 3                                 |
| <i>JAK1</i>       | Janus kinase 1                                                           |
| <i>LPCAT1</i>     | lysophosphatidylcholine acyltransferase 1                                |
| <i>ATRN</i>       | attractin                                                                |
| <i>CCL27</i>      | C-C motif chemokine ligand 27                                            |
| <i>SLC22A2</i>    | solute carrier family 22 member 2                                        |
| <i>ARL14</i>      | ADP ribosylation factor like GTPase 14                                   |
| <i>DUSP2</i>      | dual specificity phosphatase 2                                           |
| <i>IFNGR2</i>     | interferon gamma receptor 2 (interferon gamma transducer 1)              |
| <i>FCGR2A</i>     | Fc fragment of IgG receptor IIa                                          |
| <i>TTN</i>        | titin                                                                    |
| <i>VNN1</i>       | vanin 1                                                                  |
| <i>FDFT1</i>      | farnesyl-diphosphate farnesyltransferase 1                               |
| <i>MAPK9</i>      | mitogen-activated protein kinase 9                                       |
| <i>PGAP1</i>      | post-GPI attachment to proteins 1                                        |
| <i>TREM1</i>      | triggering receptor expressed on myeloid cells 1                         |
| <i>AP001610.5</i> |                                                                          |
| <i>PTPRR</i>      | protein tyrosine phosphatase, receptor type R                            |
| <i>CETP</i>       | cholesteryl ester transfer protein                                       |
| <i>CD200</i>      | CD200 molecule                                                           |

|                     |                                                        |
|---------------------|--------------------------------------------------------|
| <i>EMD</i>          | emerin                                                 |
| <i>TMEM132D</i>     | transmembrane protein 132D                             |
| <i>KLK1</i>         | kallikrein 1                                           |
| <i>NPAS3</i>        | neuronal PAS domain protein 3                          |
| <i>CPA1</i>         | carboxypeptidase A1                                    |
| <i>MILR1</i>        | mast cell immunoglobulin like receptor 1               |
| <i>ADA</i>          | adenosine deaminase                                    |
| <i>LPO</i>          | lactoperoxidase                                        |
| <i>NKX3-1</i>       | NK3 homeobox 1                                         |
| <i>PTH</i>          | parathyroid hormone                                    |
| <i>NUP43</i>        | nucleoporin 43                                         |
| <i>HSPB3</i>        | heat shock protein family B (small) member 3           |
| <i>CRIM1</i>        | cysteine rich transmembrane BMP regulator 1            |
| <i>FBLN1</i>        | fibulin 1                                              |
| <i>FABP4</i>        | fatty acid binding protein 4                           |
| <i>SPDEF</i>        | SAM pointed domain containing ETS transcription factor |
| <i>MYB</i>          | MYB proto-oncogene, transcription factor               |
| <i>C1orf141</i>     | chromosome 1 open reading frame 141                    |
| <i>RP11-757G1.6</i> |                                                        |
| <i>ASXL3</i>        | additional sex combs like 3, transcriptional regulator |
| <i>AHR</i>          | aryl hydrocarbon receptor                              |
| <i>GSK3B</i>        | glycogen synthase kinase 3 beta                        |
| <i>CYP21A2</i>      | cytochrome P450 family 21 subfamily A member 2         |
| <i>CD53</i>         | CD53 molecule                                          |

|                |                                                                                                     |
|----------------|-----------------------------------------------------------------------------------------------------|
| <i>CTSD</i>    | cathepsin D                                                                                         |
| <i>PDCD4</i>   | programmed cell death 4 (neoplastic transformation inhibitor)                                       |
| <i>TAAR6</i>   | trace amine associated receptor 6                                                                   |
| <i>ENPP5</i>   | ectonucleotide pyrophosphatase/phosphodiesterase 5 (putative)                                       |
| <i>TLR8</i>    | toll like receptor 8                                                                                |
| <i>CXCL1</i>   | C-X-C motif chemokine ligand 1                                                                      |
| <i>CDH2</i>    | cadherin 2                                                                                          |
| <i>ITGA2</i>   | integrin subunit alpha 2                                                                            |
| <i>PITPNC1</i> | phosphatidylinositol transfer protein, cytoplasmic 1                                                |
| <i>ACMSD</i>   | aminocarboxymuconate semialdehyde decarboxylase                                                     |
| <i>BLK</i>     | BLK proto-oncogene, Src family tyrosine kinase                                                      |
| <i>HHIP</i>    | hedgehog interacting protein                                                                        |
| <i>FAM167A</i> | family with sequence similarity 167 member A                                                        |
| <i>PTPN22</i>  | protein tyrosine phosphatase, non-receptor type 22                                                  |
| <i>SCLT1</i>   | sodium channel and clathrin linker 1                                                                |
| <i>OR52K3P</i> | olfactory receptor family 52 subfamily K member 3 pseudogene                                        |
| <i>FOXA3</i>   | forkhead box A3                                                                                     |
| <i>ACSL3</i>   | acyl-CoA synthetase long-chain family member 3                                                      |
| <i>DNMT1</i>   | DNA methyltransferase 1                                                                             |
| <i>THPO</i>    | thrombopoietin                                                                                      |
| <i>MUC1</i>    | mucin 1, cell surface associated                                                                    |
| <i>AKR1B1</i>  | aldo-keto reductase family 1 member B                                                               |
| <i>NEDD4L</i>  | neural precursor cell expressed, developmentally down-regulated 4-like, E3 ubiquitin protein ligase |
| <i>IKBKB</i>   | inhibitor of kappa light polypeptide gene enhancer in B-cells, kinase beta                          |

|                    |                                                                                      |
|--------------------|--------------------------------------------------------------------------------------|
| <i>P2RX1</i>       | purinergic receptor P2X 1                                                            |
| <i>XRCC1</i>       | X-ray repair cross complementing 1                                                   |
| <i>SFSWAP</i>      | splicing factor SWAP homolog                                                         |
| <i>CIITA</i>       | class II major histocompatibility complex transactivator                             |
| <i>KIR2DL4</i>     | killer cell immunoglobulin like receptor, two Ig domains and long cytoplasmic tail 4 |
| <i>THBD</i>        | thrombomodulin                                                                       |
| <i>USF2</i>        | upstream transcription factor 2, c-fos interacting                                   |
| <i>CEBPB</i>       | CCAAT/enhancer binding protein beta                                                  |
| <i>PZP</i>         | PZP, alpha-2-macroglobulin like                                                      |
| <i>NRL</i>         | neural retina leucine zipper                                                         |
| <i>PRH1</i>        | proline rich protein HaeIII subfamily 1                                              |
| <i>NEXN</i>        | nexilin F-actin binding protein                                                      |
| <i>ZPBP2</i>       | zona pellucida binding protein 2                                                     |
| <i>AQP3</i>        | aquaporin 3 (Gill blood group)                                                       |
| <i>KCNMA1</i>      | potassium calcium-activated channel subfamily M alpha 1                              |
| <i>PLCG1</i>       | phospholipase C gamma 1                                                              |
| <i>STOML2</i>      | stomatin like 2                                                                      |
| <i>NTF3</i>        | neurotrophin 3                                                                       |
| <i>CIART</i>       | circadian associated repressor of transcription                                      |
| <i>SLC26A4-AS1</i> | SLC26A4 antisense RNA 1                                                              |
| <i>TNFAIP6</i>     | TNF alpha induced protein 6                                                          |
| <i>MICA</i>        | MHC class I polypeptide-related sequence A                                           |
| <i>CD59</i>        | CD59 molecule                                                                        |
| <i>LARGE1</i>      | LARGE xylosyl- and glucuronyltransferase 1                                           |

|                     |                                                                                |
|---------------------|--------------------------------------------------------------------------------|
| <i>INPP4A</i>       | inositol polyphosphate-4-phosphatase type I A                                  |
| <i>IRF2</i>         | interferon regulatory factor 2                                                 |
| <i>ST13</i>         | suppression of tumorigenicity 13 (colon carcinoma) (Hsp70 interacting protein) |
| <i>ENPP1</i>        | ectonucleotide pyrophosphatase/phosphodiesterase 1                             |
| <i>NFATC2</i>       | nuclear factor of activated T-cells 2                                          |
| <i>MMP7</i>         | matrix metalloproteinase 7                                                     |
| <i>CISH</i>         | cytokine inducible SH2 containing protein                                      |
| <i>DUOX1</i>        | dual oxidase 1                                                                 |
| <i>AP3B1</i>        | adaptor related protein complex 3 beta 1 subunit                               |
| <i>BNC2</i>         | basonuclin 2                                                                   |
| <i>PARD3B</i>       | par-3 family cell polarity regulator beta                                      |
| <i>FTCDNL1</i>      | formiminotransferase cyclodeaminase N-terminal like                            |
| <i>MPP7</i>         | membrane palmitoylated protein 7                                               |
| <i>SLC5A12</i>      | solute carrier family 5 member 12                                              |
| <i>KRT81</i>        | keratin 81                                                                     |
| <i>GREB1</i>        | growth regulation by estrogen in breast cancer 1                               |
| <i>CCDC167</i>      | coiled-coil domain containing 167                                              |
| <i>ADAMTSL1</i>     | ADAMTS like 1                                                                  |
| <i>OR5V1</i>        | olfactory receptor family 5 subfamily V member 1                               |
| <i>ITGA8</i>        | integrin subunit alpha 8                                                       |
| <i>CTC-432M15.3</i> |                                                                                |
| <i>TMEM26</i>       | transmembrane protein 26                                                       |
| <i>RAPGEF6</i>      | Rap guanine nucleotide exchange factor 6                                       |
| <i>LUC7L2</i>       | LUC7 like 2, pre-mRNA splicing factor                                          |

|                       |                                                                            |
|-----------------------|----------------------------------------------------------------------------|
| <i>PRICKLE2</i>       | prickle planar cell polarity protein 2                                     |
| <i>OTOG</i>           | otogelin                                                                   |
| <i>DPH1</i>           | diphthamide biosynthesis 1                                                 |
| <i>KRT86</i>          | keratin 86                                                                 |
| <i>C7orf55-LUC7L2</i> | C7orf55-LUC7L2 readthrough                                                 |
| <i>KRT7</i>           | keratin 7                                                                  |
| <i>IGFBP2</i>         | insulin like growth factor binding protein 2                               |
| <i>SLC28A3</i>        | solute carrier family 28 member 3                                          |
| <i>CSMD1</i>          | CUB and Sushi multiple domains 1                                           |
| <i>CD163</i>          | CD163 molecule                                                             |
| <i>ACAA1</i>          | acetyl-CoA acyltransferase 1                                               |
| <i>MYCL</i>           | v-myc avian myelocytomatosis viral oncogene lung carcinoma derived homolog |
| <i>RYR1</i>           | ryanodine receptor 1                                                       |
| <i>CCDC138</i>        | coiled-coil domain containing 138                                          |
| <i>PTPRD</i>          | protein tyrosine phosphatase, receptor type D                              |
| <i>CSTA</i>           | cystatin A                                                                 |
| <i>AIMP1</i>          | aminoacyl tRNA synthetase complex interacting multifunctional protein 1    |
| <i>GPR68</i>          | G protein-coupled receptor 68                                              |
| <i>MTX1</i>           | metaxin 1                                                                  |
| <i>VIPR1</i>          | vasoactive intestinal peptide receptor 1                                   |
| <i>NWD2</i>           | NACHT and WD repeat domain containing 2                                    |
| <i>MIR3142HG</i>      | MIR3142 host gene                                                          |
| <i>GLB1</i>           | galactosidase beta 1                                                       |
| <i>CD48</i>           | CD48 molecule                                                              |

|                 |                                                       |
|-----------------|-------------------------------------------------------|
| <i>FAM92B</i>   | family with sequence similarity 92 member B           |
| <i>TNFRSF21</i> | TNF receptor superfamily member 21                    |
| <i>SPTBN5</i>   | spectrin beta, non-erythrocytic 5                     |
| <i>F2R</i>      | coagulation factor II thrombin receptor               |
| <i>CCL19</i>    | C-C motif chemokine ligand 19                         |
| <i>GLI2</i>     | GLI family zinc finger 2                              |
| <i>OAF</i>      | out at first homolog                                  |
| <i>LGALS1</i>   | galectin 1                                            |
| <i>P2RX7</i>    | purinergic receptor P2X 7                             |
| <i>CCDC151</i>  | coiled-coil domain containing 151                     |
| <i>ALDH2</i>    | aldehyde dehydrogenase 2 family (mitochondrial)       |
| <i>ORAI2</i>    | ORAI calcium release-activated calcium modulator 2    |
| <i>MCAM</i>     | melanoma cell adhesion molecule                       |
| <i>ZCCHC6</i>   | zinc finger CCHC-type containing 6                    |
| <i>TNFSF10</i>  | tumor necrosis factor superfamily member 10           |
| <i>LY6D</i>     | lymphocyte antigen 6 complex, locus D                 |
| <i>GCA</i>      | granulysin                                            |
| <i>KCNIP4</i>   | potassium voltage-gated channel interacting protein 4 |
| <i>SLC12A2</i>  | solute carrier family 12 member 2                     |
| <i>ANGPTL1</i>  | angiopoietin like 1                                   |
| <i>CDC42EP2</i> | CDC42 effector protein 2                              |
| <i>IL23R</i>    | interleukin 23 receptor                               |
| <i>AIPL1</i>    | aryl hydrocarbon receptor interacting protein like 1  |
| <i>GALR1</i>    | galanin receptor 1                                    |
| <i>POLR2M</i>   | RNA polymerase II subunit M                           |

|                 |                                                  |
|-----------------|--------------------------------------------------|
| <i>FIGN</i>     | fidgetin, microtubule severing factor            |
| <i>ALK</i>      | anaplastic lymphoma receptor tyrosine kinase     |
| <i>DDAH1</i>    | dimethylarginine dimethylaminohydrolase 1        |
| <i>ATP7A</i>    | ATPase copper transporting alpha                 |
| <i>FAM122C</i>  | family with sequence similarity 122C             |
| <i>CASP5</i>    | caspase 5                                        |
| <i>HS3ST1</i>   | heparan sulfate-glucosamine 3-sulfotransferase 1 |
| <i>SP140</i>    | SP140 nuclear body protein                       |
| <i>AGBL2</i>    | ATP/GTP binding protein like 2                   |
| <i>HRH3</i>     | histamine receptor H3                            |
| <i>SIRPB2</i>   | signal regulatory protein beta 2                 |
| <i>GPR156</i>   | G protein-coupled receptor 156                   |
| <i>HAS2</i>     | hyaluronan synthase 2                            |
| <i>CPB2</i>     | carboxypeptidase B2                              |
| <i>GFRA2</i>    | GDNF family receptor alpha 2                     |
| <i>CBL</i>      | Cbl proto-oncogene                               |
| <i>MAP3K8</i>   | mitogen-activated protein kinase kinase kinase 8 |
| <i>DRAM1</i>    | DNA damage regulated autophagy modulator 1       |
| <i>EFCAB12</i>  | EF-hand calcium binding domain 12                |
| <i>C12orf49</i> | chromosome 12 open reading frame 49              |
| <i>NREP</i>     | neuronal regeneration related protein            |
| <i>GALNT18</i>  | polypeptide N-acetylgalactosaminyltransferase 18 |
| <i>PTPRT</i>    | protein tyrosine phosphatase, receptor type T    |
| <i>PARVA</i>    | parvin alpha                                     |
| <i>MKX</i>      | mohawk homeobox                                  |

|                 |                                                        |
|-----------------|--------------------------------------------------------|
| <i>RARRES1</i>  | retinoic acid receptor responder 1                     |
| <i>CREB5</i>    | cAMP responsive element binding protein 5              |
| <i>SYT9</i>     | synaptotagmin 9                                        |
| <i>SNAP25</i>   | synaptosome associated protein 25                      |
| <i>AGFG1</i>    | ArfGAP with FG repeats 1                               |
| <i>VCAN</i>     | versican                                               |
| <i>FHL3</i>     | four and a half LIM domains 3                          |
| <i>BCHE</i>     | butyrylcholinesterase                                  |
| <i>CRYZ</i>     | crystallin zeta                                        |
| <i>DEFB4A</i>   | defensin beta 4A                                       |
| <i>SLC35E2</i>  | solute carrier family 35 member E2                     |
| <i>CD209</i>    | CD209 molecule                                         |
| <i>AOC1</i>     | amine oxidase, copper containing 1                     |
| <i>SMC3</i>     | structural maintenance of chromosomes 3                |
| <i>AIRE</i>     | autoimmune regulator                                   |
| <i>EPHA7</i>    | EPH receptor A7                                        |
| <i>KCND3</i>    | potassium voltage-gated channel subfamily D member 3   |
| <i>SDC4</i>     | syndecan 4                                             |
| <i>CCL21</i>    | C-C motif chemokine ligand 21                          |
| <i>GCLM</i>     | glutamate-cysteine ligase modifier subunit             |
| <i>RGS7BP</i>   | regulator of G-protein signaling 7 binding protein     |
| <i>PPP1R12A</i> | protein phosphatase 1 regulatory subunit 12A           |
| <i>GPX3</i>     | glutathione peroxidase 3                               |
| <i>KCCAT211</i> | renal clear cell carcinoma-associated transcript 211   |
| <i>GABRA5</i>   | gamma-aminobutyric acid type A receptor alpha5 subunit |

|               |                                                         |
|---------------|---------------------------------------------------------|
| <i>MUC2</i>   | mucin 2, oligomeric mucus/gel-forming                   |
| <i>DGKA</i>   | diacylglycerol kinase alpha                             |
| <i>IPO13</i>  | importin 13                                             |
| <i>CLDN1</i>  | claudin 1                                               |
| <i>NAT8</i>   | N-acetyltransferase 8 (putative)                        |
| <i>ZNF704</i> | zinc finger protein 704                                 |
| <i>COX7A2</i> | cytochrome c oxidase subunit 7A2                        |
| <i>MRO</i>    | maestro                                                 |
| <i>REEP1</i>  | receptor accessory protein 1                            |
| <i>APOL4</i>  | apolipoprotein L4                                       |
| <i>IFT122</i> | intraflagellar transport 122                            |
| <i>CDH13</i>  | cadherin 13                                             |
| <i>RP2</i>    | retinitis pigmentosa 2 (X-linked recessive)             |
| <i>SEMA7A</i> | semaphorin 7A (John Milton Hagen blood group)           |
| <i>DHRS2</i>  | dehydrogenase/reductase 2                               |
| <i>EHHADH</i> | enoyl-CoA hydratase and 3-hydroxyacyl CoA dehydrogenase |
| <i>SSH1</i>   | slingshot protein phosphatase 1                         |
| <i>DDR1</i>   | discoidin domain receptor tyrosine kinase 1             |
| <i>ATF6B</i>  | activating transcription factor 6 beta                  |
| <i>MYOCD</i>  | myocardin                                               |
| <i>TFG</i>    | TRK-fused gene                                          |
| <i>DTD1</i>   | D-tyrosyl-tRNA deacylase 1                              |
| <i>CD226</i>  | CD226 molecule                                          |
| <i>SRF</i>    | serum response factor                                   |
| <i>MAN1A1</i> | mannosidase alpha class 1A member 1                     |

|                    |                                                    |
|--------------------|----------------------------------------------------|
| <i>MTOR</i>        | mechanistic target of rapamycin                    |
| <i>IRAK1</i>       | interleukin 1 receptor associated kinase 1         |
| <i>STK10</i>       | serine/threonine kinase 10                         |
| <i>TLN1</i>        | talin 1                                            |
| <i>ZNF71</i>       | zinc finger protein 71                             |
| <i>RP1-140K8.5</i> |                                                    |
| <i>MMP14</i>       | matrix metalloproteinase 14                        |
| <i>ZBED3</i>       | zinc finger BED-type containing 3                  |
| <i>CHUK</i>        | conserved helix-loop-helix ubiquitous kinase       |
| <i>CNR1</i>        | cannabinoid receptor 1                             |
| <i>TF</i>          | transferrin                                        |
| <i>YME1L1</i>      | YME1 like 1 ATPase                                 |
| <i>TNFRSF25</i>    | TNF receptor superfamily member 25                 |
| <i>BMPER</i>       | BMP binding endothelial regulator                  |
| <i>SPIN1</i>       | spindlin 1                                         |
| <i>UBR5</i>        | ubiquitin protein ligase E3 component n-recognin 5 |
| <i>FAM104B</i>     | family with sequence similarity 104 member B       |
| <i>EPO</i>         | erythropoietin                                     |
| <i>F3</i>          | coagulation factor III, tissue factor              |
| <i>CCDC81</i>      | coiled-coil domain containing 81                   |
| <i>MAP2K1</i>      | mitogen-activated protein kinase kinase 1          |
| <i>GSTO1</i>       | glutathione S-transferase omega 1                  |
| <i>CD81</i>        | CD81 molecule                                      |
| <i>PGAP3</i>       | post-GPI attachment to proteins 3                  |
| <i>SCD</i>         | stearoyl-CoA desaturase                            |

|                          |                                                              |
|--------------------------|--------------------------------------------------------------|
| <i>ANXA6</i>             | annexin A6                                                   |
| <i>CEACAM6</i>           | carcinoembryonic antigen related cell adhesion molecule 6    |
| <i>MUC21</i>             | mucin 21, cell surface associated                            |
| <i>CD19</i>              | CD19 molecule                                                |
| <i>DPT</i>               | dermatopontin                                                |
| <i>PRTFDC1</i>           | phosphoribosyl transferase domain containing 1               |
| <i>LRP1B</i>             | LDL receptor related protein 1B                              |
| <i>KIAA0922</i>          | KIAA0922                                                     |
| <i>CCND1</i>             | cyclin D1                                                    |
| <i>MLYCD</i>             | malonyl-CoA decarboxylase                                    |
| <i>SMTN</i>              | smoothelin                                                   |
| <i>CTD-<br/>2015G9.2</i> |                                                              |
| <i>IFIT1B</i>            | interferon induced protein with tetratricopeptide repeats 1B |
| <i>CDK9</i>              | cyclin dependent kinase 9                                    |
| <i>PYGB</i>              | phosphorylase, glycogen; brain                               |
| <i>ATP6V0A4</i>          | ATPase H <sup>+</sup> transporting V0 subunit a4             |
| <i>AC093495.4</i>        |                                                              |
| <i>ZNF432</i>            | zinc finger protein 432                                      |
| <i>SUMF2</i>             | sulfatase modifying factor 2                                 |
| <i>KRT6C</i>             | keratin 6C                                                   |
| <i>RASSF10</i>           | Ras association domain family member 10                      |
| <i>CCK</i>               | cholecystokinin                                              |
| <i>RORB</i>              | RAR related orphan receptor B                                |
| <i>CXCL5</i>             | C-X-C motif chemokine ligand 5                               |

|                |                                                                        |
|----------------|------------------------------------------------------------------------|
| <i>CDC14A</i>  | cell division cycle 14A                                                |
| <i>LMNTD1</i>  | lamin tail domain containing 1                                         |
| <i>PIK3CG</i>  | phosphatidylinositol-4,5-bisphosphate 3-kinase catalytic subunit gamma |
| <i>PRPH</i>    | peripherin                                                             |
| <i>RACK1</i>   | receptor for activated C kinase 1                                      |
| <i>DEFA1</i>   | defensin alpha 1                                                       |
| <i>PCSK2</i>   | proprotein convertase subtilisin/kexin type 2                          |
| <i>RND1</i>    | Rho family GTPase 1                                                    |
| <i>ENPP2</i>   | ectonucleotide pyrophosphatase/phosphodiesterase 2                     |
| <i>FLT1</i>    | fms related tyrosine kinase 1                                          |
| <i>FKBP5</i>   | FK506 binding protein 5                                                |
| <i>TLR10</i>   | toll like receptor 10                                                  |
| <i>CREM</i>    | cAMP responsive element modulator                                      |
| <i>SKIL</i>    | SKI like proto-oncogene                                                |
| <i>KLK10</i>   | kallikrein related peptidase 10                                        |
| <i>GUSB</i>    | glucuronidase beta                                                     |
| <i>SLCO1A2</i> | solute carrier organic anion transporter family member 1A2             |
| <i>NIN</i>     | ninein                                                                 |
| <i>SLC29A3</i> | solute carrier family 29 member 3                                      |
| <i>CACNG3</i>  | calcium voltage-gated channel auxiliary subunit gamma 3                |
| <i>PRKCDBP</i> | protein kinase C delta binding protein                                 |
| <i>KLF13</i>   | Kruppel like factor 13                                                 |
| <i>DARS</i>    | aspartyl-tRNA synthetase                                               |
| <i>FAM172A</i> | family with sequence similarity 172 member A                           |
| <i>IGF1</i>    | insulin like growth factor 1                                           |

|                  |                                                  |
|------------------|--------------------------------------------------|
| <i>TFDP3</i>     | transcription factor Dp family member 3          |
| <i>C10orf107</i> | chromosome 10 open reading frame 107             |
| <i>SLFN13</i>    | schlafen family member 13                        |
| <i>MGEA5</i>     | meningioma expressed antigen 5 (hyaluronidase)   |
| <i>HSD11B1</i>   | hydroxysteroid 11-beta dehydrogenase 1           |
| <i>CCL8</i>      | C-C motif chemokine ligand 8                     |
| <i>ABTB2</i>     | ankyrin repeat and BTB domain containing 2       |
| <i>GPI</i>       | glucose-6-phosphate isomerase                    |
| <i>B2M</i>       | beta-2-microglobulin                             |
| <i>SHH</i>       | sonic hedgehog                                   |
| <i>SOD3</i>      | superoxide dismutase 3, extracellular            |
| <i>KIAA2012</i>  | KIAA2012                                         |
| <i>MMP25</i>     | matrix metalloproteinase 25                      |
| <i>CLC</i>       | Charcot-Leyden crystal galectin                  |
| <i>CCDC140</i>   | coiled-coil domain containing 140                |
| <i>CD63</i>      | CD63 molecule                                    |
| <i>ARG2</i>      | arginase 2                                       |
| <i>PGRMC1</i>    | progesterone receptor membrane component 1       |
| <i>EPHA4</i>     | EPH receptor A4                                  |
| <i>CD7</i>       | CD7 molecule                                     |
| <i>SRC</i>       | SRC proto-oncogene, non-receptor tyrosine kinase |
| <i>ADGRA1</i>    | adhesion G protein-coupled receptor A1           |
| <i>SST</i>       | somatostatin                                     |
| <i>F8</i>        | coagulation factor VIII                          |
| <i>TFAM</i>      | transcription factor A, mitochondrial            |

|                  |                                                                                                  |
|------------------|--------------------------------------------------------------------------------------------------|
| <i>UCN3</i>      | urocortin 3                                                                                      |
| <i>ACRC</i>      | acidic repeat containing                                                                         |
| <i>FCGR2B</i>    | Fc fragment of IgG receptor IIb                                                                  |
| <i>FOXN2</i>     | forkhead box N2                                                                                  |
| <i>TSC22D3</i>   | TSC22 domain family member 3                                                                     |
| <i>FAM166B</i>   | family with sequence similarity 166 member B                                                     |
| <i>C14orf177</i> | chromosome 14 open reading frame 177                                                             |
| <i>GLIS3-AS1</i> | GLIS3 antisense RNA 1                                                                            |
| <i>SPHK1</i>     | sphingosine kinase 1                                                                             |
| <i>SPRR1A</i>    | small proline rich protein 1A                                                                    |
| <i>SEMA6A</i>    | semaphorin 6A                                                                                    |
| <i>RELB</i>      | RELB proto-oncogene, NF-kB subunit                                                               |
| <i>RABL2A</i>    | RAB, member of RAS oncogene family-like 2A                                                       |
| <i>FLT3LG</i>    | fms related tyrosine kinase 3 ligand                                                             |
| <i>C1orf87</i>   | chromosome 1 open reading frame 87                                                               |
| <i>BAMBI</i>     | BMP and activin membrane bound inhibitor                                                         |
| <i>FCGR3A</i>    | Fc fragment of IgG receptor IIIa                                                                 |
| <i>OPRK1</i>     | opioid receptor kappa 1                                                                          |
| <i>RNGTT</i>     | RNA guanylyltransferase and 5'-phosphatase                                                       |
| <i>KRT39</i>     | keratin 39                                                                                       |
| <i>GIF</i>       | gastric intrinsic factor                                                                         |
| <i>OLR1</i>      | oxidized low density lipoprotein receptor 1                                                      |
| <i>IKBKAP</i>    | inhibitor of kappa light polypeptide gene enhancer in B-cells, kinase complex-associated protein |
| <i>NTF4</i>      | neurotrophin 4                                                                                   |

|                |                                                                  |
|----------------|------------------------------------------------------------------|
| <i>HES4</i>    | hes family bHLH transcription factor 4                           |
| <i>GAS2L2</i>  | growth arrest specific 2 like 2                                  |
| <i>CNTN4</i>   | contactin 4                                                      |
| <i>APP</i>     | amyloid beta precursor protein                                   |
| <i>CLEC2D</i>  | C-type lectin domain family 2 member D                           |
| <i>CTTN</i>    | cortactin                                                        |
| <i>KLRD1</i>   | killer cell lectin like receptor D1                              |
| <i>HNF4G</i>   | hepatocyte nuclear factor 4 gamma                                |
| <i>ATP8A2</i>  | ATPase phospholipid transporting 8A2                             |
| <i>RARS</i>    | arginyl-tRNA synthetase                                          |
| <i>GPX2</i>    | glutathione peroxidase 2                                         |
| <i>APLN</i>    | apelin                                                           |
| <i>DANCR</i>   | differentiation antagonizing non-protein coding RNA              |
| <i>SLC33A1</i> | solute carrier family 33 member 1                                |
| <i>AGTR1</i>   | angiotensin II receptor type 1                                   |
| <i>PLEKHO2</i> | pleckstrin homology domain containing O2                         |
| <i>JAZF1</i>   | JAZF zinc finger 1                                               |
| <i>OTC</i>     | ornithine carbamoyltransferase                                   |
| <i>NTRK2</i>   | neurotrophic receptor tyrosine kinase 2                          |
| <i>NTS</i>     | neurotensin                                                      |
| <i>CCR10</i>   | C-C motif chemokine receptor 10                                  |
| <i>P3H3</i>    | prolyl 3-hydroxylase 3                                           |
| <i>TRPC1</i>   | transient receptor potential cation channel subfamily C member 1 |
| <i>ZFPM1</i>   | zinc finger protein, FOG family member 1                         |
| <i>CALM3</i>   | calmodulin 3                                                     |

|                      |                                                                        |
|----------------------|------------------------------------------------------------------------|
| <i>MTURN</i>         | maturin, neural progenitor differentiation regulator homolog           |
| <i>PIK3CA</i>        | phosphatidylinositol-4,5-bisphosphate 3-kinase catalytic subunit alpha |
| <i>LPAR2</i>         | lysophosphatidic acid receptor 2                                       |
| <i>TAPBP</i>         | TAP binding protein                                                    |
| <i>TBXAS1</i>        | thromboxane A synthase 1                                               |
| <i>EPGN</i>          | epithelial mitogen                                                     |
| <i>TNFRSF1A</i>      | TNF receptor superfamily member 1A                                     |
| <i>RP11-403113.8</i> |                                                                        |
| <i>ANK1</i>          | ankyrin 1                                                              |
| <i>NARFL</i>         | nuclear prelamin A recognition factor like                             |
| <i>KDM4C</i>         | lysine demethylase 4C                                                  |
| <i>CDH18</i>         | cadherin 18                                                            |
| <i>TRIM31</i>        | tripartite motif containing 31                                         |
| <i>EFNA1</i>         | ephrin A1                                                              |
| <i>XCL1</i>          | X-C motif chemokine ligand 1                                           |
| <i>GOT2</i>          | glutamic-oxaloacetic transaminase 2                                    |
| <i>FPR2</i>          | formyl peptide receptor 2                                              |
| <i>PRDX2</i>         | peroxiredoxin 2                                                        |
| <i>INPP5D</i>        | inositol polyphosphate-5-phosphatase D                                 |
| <i>DEGS1</i>         | delta 4-desaturase, sphingolipid 1                                     |
| <i>FAM189A1</i>      | family with sequence similarity 189 member A1                          |
| <i>IL25</i>          | interleukin 25                                                         |
| <i>APOH</i>          | apolipoprotein H                                                       |
| <i>FILIP1</i>        | filamin A interacting protein 1                                        |

|                 |                                                                              |
|-----------------|------------------------------------------------------------------------------|
| <i>SFTPA1</i>   | surfactant protein A1                                                        |
| <i>TMEM74B</i>  | transmembrane protein 74B                                                    |
| <i>C2CD4B</i>   | C2 calcium dependent domain containing 4B                                    |
| <i>SIGIRR</i>   | single Ig and TIR domain containing                                          |
| <i>PCDH17</i>   | protocadherin 17                                                             |
| <i>THBS2</i>    | thrombospondin 2                                                             |
| <i>HDC</i>      | histidine decarboxylase                                                      |
| <i>CLCF1</i>    | cardiotrophin-like cytokine factor 1                                         |
| <i>DBX1</i>     | developing brain homeobox 1                                                  |
| <i>DMRT1</i>    | doublesex and mab-3 related transcription factor 1                           |
| <i>NROB1</i>    | nuclear receptor subfamily 0 group B member 1                                |
| <i>TMEM219</i>  | transmembrane protein 219                                                    |
| <i>TRPC3</i>    | transient receptor potential cation channel subfamily C member 3             |
| <i>HSD3B1</i>   | hydroxy-delta-5-steroid dehydrogenase, 3 beta- and steroid delta-isomerase 1 |
| <i>EPB41L4B</i> | erythrocyte membrane protein band 4.1 like 4B                                |
| <i>NDRG1</i>    | N-myc downstream regulated 1                                                 |
| <i>SPRY1</i>    | sprouty RTK signaling antagonist 1                                           |
| <i>ARRDC4</i>   | arrestin domain containing 4                                                 |
| <i>BID</i>      | BH3 interacting domain death agonist                                         |
| <i>GALNT5</i>   | polypeptide N-acetylgalactosaminyltransferase 5                              |
| <i>FURIN</i>    | furin, paired basic amino acid cleaving enzyme                               |
| <i>CTDP1</i>    | CTD phosphatase subunit 1                                                    |
| <i>MCPH1</i>    | microcephalin 1                                                              |
| <i>ETV1</i>     | ETS variant 1                                                                |
| <i>SLITRK5</i>  | SLIT and NTRK like family member 5                                           |

|                 |                                                                            |
|-----------------|----------------------------------------------------------------------------|
| <i>GNAI1</i>    | G protein subunit alpha i1                                                 |
| <i>CACNA2D1</i> | calcium voltage-gated channel auxiliary subunit alpha2delta 1              |
| <i>TWIST1</i>   | twist family bHLH transcription factor 1                                   |
| <i>TCL1B</i>    | T-cell leukemia/lymphoma 1B                                                |
| <i>ASAP1</i>    | ArfGAP with SH3 domain, ankyrin repeat and PH domain 1                     |
| <i>NFASC</i>    | neurofascin                                                                |
| <i>SOX4</i>     | SRY-box 4                                                                  |
| <i>PCDH7</i>    | protocadherin 7                                                            |
| <i>FOXL1</i>    | forkhead box L1                                                            |
| <i>MYLIP</i>    | myosin regulatory light chain interacting protein                          |
| <i>NUFIP1</i>   | NUFIP1, FMR1 interacting protein 1                                         |
| <i>MICAL2</i>   | microtubule associated monooxygenase, calponin and LIM domain containing 2 |
| <i>ZFP42</i>    | ZFP42 zinc finger protein                                                  |
| <i>TBX1</i>     | T-box 1                                                                    |
| <i>AKAP2</i>    | A-kinase anchoring protein 2                                               |
| <i>GUCY2C</i>   | guanylate cyclase 2C                                                       |
| <i>EIF4E</i>    | eukaryotic translation initiation factor 4E                                |
| <i>ZMYND15</i>  | zinc finger MYND-type containing 15                                        |
| <i>TGFBR2</i>   | transforming growth factor beta receptor 2                                 |
| <i>SERPINB2</i> | serpin family B member 2                                                   |
| <i>C11orf16</i> | chromosome 11 open reading frame 16                                        |
| <i>DUSP8</i>    | dual specificity phosphatase 8                                             |
| <i>GPR148</i>   | G protein-coupled receptor 148                                             |
| <i>MUC15</i>    | mucin 15, cell surface associated                                          |
| <i>MYLK3</i>    | myosin light chain kinase 3                                                |

|                |                                                                           |
|----------------|---------------------------------------------------------------------------|
| <i>RAG2</i>    | recombination activating 2                                                |
| <i>MS4A1</i>   | membrane spanning 4-domains A1                                            |
| <i>FAM229B</i> | family with sequence similarity 229 member B                              |
| <i>DYX1C1</i>  | dyslexia susceptibility 1 candidate 1                                     |
| <i>SFTPB</i>   | surfactant protein B                                                      |
| <i>CD24</i>    | CD24 molecule                                                             |
| <i>CD93</i>    | CD93 molecule                                                             |
| <i>ANO3</i>    | anoctamin 3                                                               |
| <i>ATF4</i>    | activating transcription factor 4                                         |
| <i>KCNMB1</i>  | potassium calcium-activated channel subfamily M regulatory beta subunit 1 |
| <i>STIP1</i>   | stress induced phosphoprotein 1                                           |
| <i>CCL4</i>    | C-C motif chemokine ligand 4                                              |
| <i>OR7E47P</i> | olfactory receptor family 7 subfamily E member 47 pseudogene              |
| <i>SPEF1</i>   | sperm flagellar 1                                                         |
| <i>IL12RB1</i> | interleukin 12 receptor subunit beta 1                                    |
| <i>RP1</i>     | retinitis pigmentosa 1 (autosomal dominant)                               |
| <i>CARD17</i>  | caspase recruitment domain family member 17                               |
| <i>PDCD1</i>   | programmed cell death 1                                                   |
| <i>AMBN</i>    | ameloblastin                                                              |
| <i>IVL</i>     | involucrin                                                                |
| <i>CTSB</i>    | cathepsin B                                                               |
| <i>NFIA</i>    | nuclear factor I A                                                        |
| <i>FANCA</i>   | Fanconi anemia complementation group A                                    |
| <i>MPL</i>     | MPL proto-oncogene, thrombopoietin receptor                               |
| <i>TAGLN</i>   | transgelin                                                                |

|                     |                                                                  |
|---------------------|------------------------------------------------------------------|
| <i>C6</i>           | complement C6                                                    |
| <i>MAP3K5</i>       | mitogen-activated protein kinase kinase kinase 5                 |
| <i>DLL1</i>         | delta like canonical Notch ligand 1                              |
| <i>SLC30A1</i>      | solute carrier family 30 member 1                                |
| <i>PNN</i>          | pinin, desmosome associated protein                              |
| <i>TRPV4</i>        | transient receptor potential cation channel subfamily V member 4 |
| <i>SDCBP2</i>       | syndecan binding protein 2                                       |
| <i>RP4-529N6.2</i>  |                                                                  |
| <i>MEP1B</i>        | meprin A subunit beta                                            |
| <i>NR3C2</i>        | nuclear receptor subfamily 3 group C member 2                    |
| <i>PLD2</i>         | phospholipase D2                                                 |
| <i>NRP1</i>         | neuropilin 1                                                     |
| <i>ASPN</i>         | asporin                                                          |
| <i>CTH</i>          | cystathionine gamma-lyase                                        |
| <i>GK</i>           | glycerol kinase                                                  |
| <i>LTK</i>          | leukocyte receptor tyrosine kinase                               |
| <i>NRTN</i>         | neurturin                                                        |
| <i>PDCD5</i>        | programmed cell death 5                                          |
| <i>MT-CYB</i>       | mitochondrially encoded cytochrome b                             |
| <i>CBS</i>          | cystathionine-beta-synthase                                      |
| <i>RCC1</i>         | regulator of chromosome condensation 1                           |
| <i>MTNR1A</i>       | melatonin receptor 1A                                            |
| <i>BST1</i>         | bone marrow stromal cell antigen 1                               |
| <i>RP4-568C11.4</i> |                                                                  |

|                 |                                                           |
|-----------------|-----------------------------------------------------------|
| <i>GZMA</i>     | granzyme A                                                |
| <i>CABIN1</i>   | calcineurin binding protein 1                             |
| <i>JADE1</i>    | jade family PHD finger 1                                  |
| <i>PTPRN2</i>   | protein tyrosine phosphatase, receptor type N2            |
| <i>SERPINC1</i> | serpin family C member 1                                  |
| <i>BMP2</i>     | bone morphogenetic protein 2                              |
| <i>GIGYF2</i>   | GRB10 interacting GYF protein 2                           |
| <i>LMO3</i>     | LIM domain only 3                                         |
| <i>HDAC4</i>    | histone deacetylase 4                                     |
| <i>OR10J3</i>   | olfactory receptor family 10 subfamily J member 3         |
| <i>ST3GAL1</i>  | ST3 beta-galactoside alpha-2,3-sialyltransferase 1        |
| <i>KLK4</i>     | kallikrein related peptidase 4                            |
| <i>TRIQQ</i>    | triple QxxK/R motif containing                            |
| <i>CCDC178</i>  | coiled-coil domain containing 178                         |
| <i>SARAF</i>    | store-operated calcium entry associated regulatory factor |
| <i>LY96</i>     | lymphocyte antigen 96                                     |
| <i>ITPR2</i>    | inositol 1,4,5-trisphosphate receptor type 2              |
| <i>SSB</i>      | Sjogren syndrome antigen B                                |
| <i>SLC11A1</i>  | solute carrier family 11 member 1                         |
| <i>CTNNB1</i>   | catenin beta 1                                            |
| <i>DPP6</i>     | dipeptidyl peptidase like 6                               |
| <i>IGSF10</i>   | immunoglobulin superfamily member 10                      |
| <i>LRRC18</i>   | leucine rich repeat containing 18                         |
| <i>WNT9A</i>    | Wnt family member 9A                                      |
| <i>IL3RA</i>    | interleukin 3 receptor subunit alpha                      |

|                 |                                                             |
|-----------------|-------------------------------------------------------------|
| <i>ESR2</i>     | estrogen receptor 2                                         |
| <i>CNGA4</i>    | cyclic nucleotide gated channel alpha 4                     |
| <i>PEX6</i>     | peroxisomal biogenesis factor 6                             |
| <i>CYP27A1</i>  | cytochrome P450 family 27 subfamily A member 1              |
| <i>PCDH20</i>   | protocadherin 20                                            |
| <i>DAW1</i>     | dynein assembly factor with WD repeats 1                    |
| <i>SLC7A2</i>   | solute carrier family 7 member 2                            |
| <i>TLX2</i>     | T-cell leukemia homeobox 2                                  |
| <i>EGR1</i>     | early growth response 1                                     |
| <i>ATG7</i>     | autophagy related 7                                         |
| <i>MUC3A</i>    | mucin 3A, cell surface associated                           |
| <i>RAB24</i>    | RAB24, member RAS oncogene family                           |
| <i>SALL3</i>    | spalt like transcription factor 3                           |
| <i>GTDC1</i>    | glycosyltransferase like domain containing 1                |
| <i>ASAP2</i>    | ArfGAP with SH3 domain, ankyrin repeat and PH domain 2      |
| <i>DTWD2</i>    | DTW domain containing 2                                     |
| <i>GPER1</i>    | G protein-coupled estrogen receptor 1                       |
| <i>CCNA2</i>    | cyclin A2                                                   |
| <i>CYP39A1</i>  | cytochrome P450 family 39 subfamily A member 1              |
| <i>NGFR</i>     | nerve growth factor receptor                                |
| <i>GDNF</i>     | glial cell derived neurotrophic factor                      |
| <i>RAET1L</i>   | retinoic acid early transcript 1L                           |
| <i>ATOH8</i>    | atonal bHLH transcription factor 8                          |
| <i>ANO1</i>     | anoctamin 1                                                 |
| <i>MAPKAPK2</i> | mitogen-activated protein kinase-activated protein kinase 2 |

|                    |                                                                            |
|--------------------|----------------------------------------------------------------------------|
| <i>HBEGF</i>       | heparin binding EGF like growth factor                                     |
| <i>KLKB1</i>       | kallikrein B1                                                              |
| <i>CCL1</i>        | C-C motif chemokine ligand 1                                               |
| <i>ATP2A2</i>      | ATPase sarcoplasmic/endoplasmic reticulum Ca <sup>2+</sup> transporting 2  |
| <i>SLC2A6</i>      | solute carrier family 2 member 6                                           |
| <i>OPN3</i>        | opsin 3                                                                    |
| <i>AC006262.11</i> |                                                                            |
| <i>UBE2E2</i>      | ubiquitin conjugating enzyme E2 E2                                         |
| <i>LOX</i>         | lysyl oxidase                                                              |
| <i>CYBRD1</i>      | cytochrome b reductase 1                                                   |
| <i>OR6X1</i>       | olfactory receptor family 6 subfamily X member 1                           |
| <i>SVEP1</i>       | sushi, von Willebrand factor type A, EGF and pentraxin domain containing 1 |
| <i>OPRM1</i>       | opioid receptor mu 1                                                       |
| <i>ANKFN1</i>      | ankyrin repeat and fibronectin type III domain containing 1                |
| <i>MICB</i>        | MHC class I polypeptide-related sequence B                                 |
| <i>ACVR2B</i>      | activin A receptor type 2B                                                 |
| <i>GRP</i>         | gastrin releasing peptide                                                  |
| <i>TLE2</i>        | transducin like enhancer of split 2                                        |
| <i>IRF9</i>        | interferon regulatory factor 9                                             |
| <i>TBCD</i>        | tubulin folding cofactor D                                                 |
| <i>PLAGL1</i>      | PLAG1 like zinc finger 1                                                   |
| <i>PAIP2B</i>      | poly(A) binding protein interacting protein 2B                             |
| <i>BDKRB1</i>      | bradykinin receptor B1                                                     |
| <i>CPN1</i>        | carboxypeptidase N subunit 1                                               |
| <i>CYP21A1P</i>    | cytochrome P450 family 21 subfamily A member 1, pseudogene                 |

|                   |                                                                  |
|-------------------|------------------------------------------------------------------|
| <i>TRPM8</i>      | transient receptor potential cation channel subfamily M member 8 |
| <i>DNTT</i>       | DNA nucleotidylexotransferase                                    |
| <i>LRMP</i>       | lymphoid restricted membrane protein                             |
| <i>FCAR</i>       | Fc fragment of IgA receptor                                      |
| <i>DONSON</i>     | downstream neighbor of SON                                       |
| <i>LALBA</i>      | lactalbumin alpha                                                |
| <i>GPX4</i>       | glutathione peroxidase 4                                         |
| <i>PPP1R12B</i>   | protein phosphatase 1 regulatory subunit 12B                     |
| <i>STIL</i>       | SCL/TAL1 interrupting locus                                      |
| <i>IL21R</i>      | interleukin 21 receptor                                          |
| <i>KRT10</i>      | keratin 10                                                       |
| <i>HSPG2</i>      | heparan sulfate proteoglycan 2                                   |
| <i>CPOX</i>       | coproporphyrinogen oxidase                                       |
| <i>ARHGD1B</i>    | Rho GDP dissociation inhibitor beta                              |
| <i>APOBR</i>      | apolipoprotein B receptor                                        |
| <i>SPACA7</i>     | sperm acrosome associated 7                                      |
| <i>CD68</i>       | CD68 molecule                                                    |
| <i>PAOX</i>       | polyamine oxidase (exo-N4-amino)                                 |
| <i>DCAF4</i>      | DDB1 and CUL4 associated factor 4                                |
| <i>CTSC</i>       | cathepsin C                                                      |
| <i>PRMT1</i>      | protein arginine methyltransferase 1                             |
| <i>MAB21L3</i>    | mab-21 like 3                                                    |
| <i>CEP44</i>      | centrosomal protein 44                                           |
| <i>AL365202.1</i> |                                                                  |
| <i>ALDH7A1</i>    | aldehyde dehydrogenase 7 family member A1                        |

|                 |                                                   |
|-----------------|---------------------------------------------------|
| <i>QKI</i>      | QKI, KH domain containing RNA binding             |
| <i>IGFBP7</i>   | insulin like growth factor binding protein 7      |
| <i>NCAM2</i>    | neural cell adhesion molecule 2                   |
| <i>CXXC4</i>    | CXXC finger protein 4                             |
| <i>TCF7</i>     | transcription factor 7 (T-cell specific, HMG-box) |
| <i>MMP19</i>    | matrix metalloproteinase 19                       |
| <i>RCAN1</i>    | regulator of calcineurin 1                        |
| <i>GRIP2</i>    | glutamate receptor interacting protein 2          |
| <i>EPS8L3</i>   | EPS8 like 3                                       |
| <i>PM20D1</i>   | peptidase M20 domain containing 1                 |
| <i>MAPK8</i>    | mitogen-activated protein kinase 8                |
| <i>DCT</i>      | dopachrome tautomerase                            |
| <i>GLA</i>      | galactosidase alpha                               |
| <i>CLEC2B</i>   | C-type lectin domain family 2 member B            |
| <i>GLT1D1</i>   | glycosyltransferase 1 domain containing 1         |
| <i>FFAR2</i>    | free fatty acid receptor 2                        |
| <i>HEATR9</i>   | HEAT repeat containing 9                          |
| <i>SLC26A3</i>  | solute carrier family 26 member 3                 |
| <i>PPOX</i>     | protoporphyrinogen oxidase                        |
| <i>RIT1</i>     | Ras like without CAAX 1                           |
| <i>LYST</i>     | lysosomal trafficking regulator                   |
| <i>C21orf58</i> | chromosome 21 open reading frame 58               |
| <i>SMTNL1</i>   | smoothelin like 1                                 |
| <i>RB1</i>      | RB transcriptional corepressor 1                  |
| <i>TGFBI</i>    | transforming growth factor beta induced           |

|                 |                                                                  |
|-----------------|------------------------------------------------------------------|
| <i>PNPLA4</i>   | patatin like phospholipase domain containing 4                   |
| <i>CD2</i>      | CD2 molecule                                                     |
| <i>RSPH14</i>   | radial spoke head 14 homolog                                     |
| <i>NKX2-1</i>   | NK2 homeobox 1                                                   |
| <i>ALKBH1</i>   | alkB homolog 1, histone H2A dioxygenase                          |
| <i>NFKBIE</i>   | NFKB inhibitor epsilon                                           |
| <i>CDIP1</i>    | cell death inducing p53 target 1                                 |
| <i>MAP2K3</i>   | mitogen-activated protein kinase kinase 3                        |
| <i>INS</i>      | insulin                                                          |
| <i>ITGA1</i>    | integrin subunit alpha 1                                         |
| <i>IFNGR1</i>   | interferon gamma receptor 1                                      |
| <i>CYP24A1</i>  | cytochrome P450 family 24 subfamily A member 1                   |
| <i>SERPINB4</i> | serpin family B member 4                                         |
| <i>CCS</i>      | copper chaperone for superoxide dismutase                        |
| <i>XIAP</i>     | X-linked inhibitor of apoptosis                                  |
| <i>TRPM7</i>    | transient receptor potential cation channel subfamily M member 7 |
| <i>BTK</i>      | Bruton tyrosine kinase                                           |
| <i>ZNF248</i>   | zinc finger protein 248                                          |
| <i>BGN</i>      | biglycan                                                         |
| <i>MROH9</i>    | maestro heat like repeat family member 9                         |
| <i>SLC16A7</i>  | solute carrier family 16 member 7                                |
| <i>FAM184A</i>  | family with sequence similarity 184 member A                     |
| <i>WFDC1</i>    | WAP four-disulfide core domain 1                                 |
| <i>CTNNAL1</i>  | catenin alpha like 1                                             |
| <i>PEBP1</i>    | phosphatidylethanolamine binding protein 1                       |

|                      |                                                          |
|----------------------|----------------------------------------------------------|
| <i>SFTPC</i>         | surfactant protein C                                     |
| <i>MUC4</i>          | mucin 4, cell surface associated                         |
| <i>KDR</i>           | kinase insert domain receptor                            |
| <i>TP53AIP1</i>      | tumor protein p53 regulated apoptosis inducing protein 1 |
| <i>HTR2B</i>         | 5-hydroxytryptamine receptor 2B                          |
| <i>POU2F1</i>        | POU class 2 homeobox 1                                   |
| <i>NF1</i>           | neurofibromin 1                                          |
| <i>PPIA</i>          | peptidylprolyl isomerase A                               |
| <i>KCNH3</i>         | potassium voltage-gated channel subfamily H member 3     |
| <i>JAKMIP1</i>       | janus kinase and microtubule interacting protein 1       |
| <i>CTSG</i>          | cathepsin G                                              |
| <i>T</i>             | T brachyury transcription factor                         |
| <i>ANXA2</i>         | annexin A2                                               |
| <i>IL12RB2</i>       | interleukin 12 receptor subunit beta 2                   |
| <i>C10orf95</i>      | chromosome 10 open reading frame 95                      |
| <i>RUNX3</i>         | runt related transcription factor 3                      |
| <i>MOCS1</i>         | molybdenum cofactor synthesis 1                          |
| <i>ADCY10</i>        | adenylate cyclase 10, soluble                            |
| <i>RP11-416L21.2</i> |                                                          |
| <i>PTGER4</i>        | prostaglandin E receptor 4                               |
| <i>POR</i>           | cytochrome p450 oxidoreductase                           |
| <i>ACVR1B</i>        | activin A receptor type 1B                               |
| <i>SERTAD1</i>       | SERTA domain containing 1                                |
| <i>SPI1</i>          | Spi-1 proto-oncogene                                     |

|                |                                                     |
|----------------|-----------------------------------------------------|
| <i>PPP6R3</i>  | protein phosphatase 6 regulatory subunit 3          |
| <i>DAP3</i>    | death associated protein 3                          |
| <i>PLXND1</i>  | plexin D1                                           |
| <i>C7</i>      | complement C7                                       |
| <i>SNRNP27</i> | small nuclear ribonucleoprotein U4/U6.U5 subunit 27 |
| <i>NSD1</i>    | nuclear receptor binding SET domain protein 1       |
| <i>PTPN1</i>   | protein tyrosine phosphatase, non-receptor type 1   |
| <i>SEMA4A</i>  | semaphorin 4A                                       |
| <i>C2orf81</i> | chromosome 2 open reading frame 81                  |
| <i>UMOD</i>    | uromodulin                                          |
| <i>TEKT4</i>   | tektin 4                                            |
| <i>EMB</i>     | embigin                                             |
| <i>GTF2H4</i>  | general transcription factor IIH subunit 4          |
| <i>CD79A</i>   | CD79a molecule                                      |
| <i>UTS2R</i>   | urotensin 2 receptor                                |
| <i>GAST</i>    | gastrin                                             |
| <i>HCG22</i>   | HLA complex group 22                                |
| <i>DNAH9</i>   | dynein axonemal heavy chain 9                       |
| <i>PGLYRP1</i> | peptidoglycan recognition protein 1                 |
| <i>CBWD1</i>   | COBW domain containing 1                            |
| <i>MLLT1</i>   | MLLT1, super elongation complex subunit             |
| <i>WNT1</i>    | Wnt family member 1                                 |
| <i>NOX5</i>    | NADPH oxidase 5                                     |
| <i>AIDA</i>    | axin interactor, dorsalization associated           |
| <i>PDGFB</i>   | platelet derived growth factor subunit B            |

|                  |                                                        |
|------------------|--------------------------------------------------------|
| <i>ACP5</i>      | acid phosphatase 5, tartrate resistant                 |
| <i>F11R</i>      | F11 receptor                                           |
| <i>FOXP2</i>     | forkhead box K2                                        |
| <i>LOR</i>       | loricrin                                               |
| <i>ROCK2</i>     | Rho associated coiled-coil containing protein kinase 2 |
| <i>OR10A4</i>    | olfactory receptor family 10 subfamily A member 4      |
| <i>TFAP4</i>     | transcription factor AP-4                              |
| <i>SIAH3</i>     | siah E3 ubiquitin protein ligase family member 3       |
| <i>CAAP1</i>     | caspase activity and apoptosis inhibitor 1             |
| <i>NR1H4</i>     | nuclear receptor subfamily 1 group H member 4          |
| <i>LUM</i>       | lumican                                                |
| <i>TIMP3</i>     | TIMP metalloproteinase inhibitor 3                     |
| <i>DPYS</i>      | dihydropyrimidinase                                    |
| <i>PRSS35</i>    | protease, serine 35                                    |
| <i>CSMD3</i>     | CUB and Sushi multiple domains 3                       |
| <i>BIRC2</i>     | baculoviral IAP repeat containing 2                    |
| <i>CSF2RA</i>    | colony stimulating factor 2 receptor alpha subunit     |
| <i>RAB1A</i>     | RAB1A, member RAS oncogene family                      |
| <i>PSMA3</i>     | proteasome subunit alpha 3                             |
| <i>HPN</i>       | hepsin                                                 |
| <i>CDKN2A</i>    | cyclin dependent kinase inhibitor 2A                   |
| <i>TGFBR3</i>    | transforming growth factor beta receptor 3             |
| <i>IKZF1</i>     | IKAROS family zinc finger 1                            |
| <i>BAALC</i>     | brain and acute leukemia, cytoplasmic                  |
| <i>LINC01132</i> | long intergenic non-protein coding RNA 1132            |

|                     |                                                              |
|---------------------|--------------------------------------------------------------|
| <i>BCAS2P2</i>      | breast carcinoma amplified sequence 2 pseudogene 2           |
| <i>ZMYND12</i>      | zinc finger MYND-type containing 12                          |
| <i>RP11-93B14.9</i> |                                                              |
| <i>ADAMTS12</i>     | ADAM metallopeptidase with thrombospondin type 1 motif 12    |
| <i>HGS</i>          | hepatocyte growth factor-regulated tyrosine kinase substrate |
| <i>GHRL</i>         | ghrelin and obestatin prepropeptide                          |
| <i>PSMC6</i>        | proteasome 26S subunit, ATPase 6                             |
| <i>RELA</i>         | RELA proto-oncogene, NF-kB subunit                           |
| <i>HMOX2</i>        | heme oxygenase 2                                             |
| <i>FCGBP</i>        | Fc fragment of IgG binding protein                           |
| <i>ASPHD2</i>       | aspartate beta-hydroxylase domain containing 2               |
| <i>CD5</i>          | CD5 molecule                                                 |
| <i>CPA3</i>         | carboxypeptidase A3                                          |
| <i>DCTN3</i>        | dynactin subunit 3                                           |
| <i>IDS</i>          | iduronate 2-sulfatase                                        |
| <i>ZGLP1</i>        | zinc finger, GATA-like protein 1                             |
| <i>SPRR2C</i>       | small proline rich protein 2C (pseudogene)                   |
| <i>AOC2</i>         | amine oxidase, copper containing 2                           |
| <i>IRF3</i>         | interferon regulatory factor 3                               |
| <i>ACP1</i>         | acid phosphatase 1, soluble                                  |
| <i>CXCL16</i>       | C-X-C motif chemokine ligand 16                              |
| <i>P2RY2</i>        | purinergic receptor P2Y2                                     |
| <i>NLRP12</i>       | NLR family pyrin domain containing 12                        |
| <i>IGHG2</i>        | immunoglobulin heavy constant gamma 2 (G2m marker)           |

|                     |                                                    |
|---------------------|----------------------------------------------------|
| <i>TRIM55</i>       | tripartite motif containing 55                     |
| <i>HGSNAT</i>       | heparan-alpha-glucosaminide N-acetyltransferase    |
| <i>EXOC3L4</i>      | exocyst complex component 3 like 4                 |
| <i>EMSY</i>         | EMSY, BRCA2 interacting transcriptional repressor  |
| <i>DGKH</i>         | diacylglycerol kinase eta                          |
| <i>PARPBP</i>       | PARP1 binding protein                              |
| <i>BCL2</i>         | BCL2, apoptosis regulator                          |
| <i>RP11-333O1.1</i> |                                                    |
| <i>BCL6</i>         | B-cell CLL/lymphoma 6                              |
| <i>REXO1L1P</i>     | REX1, RNA exonuclease 1 homolog-like 1, pseudogene |
| <i>CYP2D6</i>       | cytochrome P450 family 2 subfamily D member 6      |
| <i>KRT14</i>        | keratin 14                                         |
| <i>FMO5</i>         | flavin containing monooxygenase 5                  |
| <i>IRAK4</i>        | interleukin 1 receptor associated kinase 4         |
| <i>CFLAR-AS1</i>    | CFLAR antisense RNA 1                              |
| <i>CD33</i>         | CD33 molecule                                      |
| <i>SLC7A6</i>       | solute carrier family 7 member 6                   |
| <i>YY1</i>          | YY1 transcription factor                           |
| <i>ZFAT</i>         | zinc finger and AT-hook domain containing          |
| <i>LMCD1</i>        | LIM and cysteine rich domains 1                    |
| <i>AMY1A</i>        | amylase, alpha 1A (salivary)                       |
| <i>CASR</i>         | calcium sensing receptor                           |
| <i>CTSK</i>         | cathepsin K                                        |
| <i>SDK2</i>         | sidekick cell adhesion molecule 2                  |

|                       |                                                                              |
|-----------------------|------------------------------------------------------------------------------|
| <i>TNXB</i>           | tenascin XB                                                                  |
| <i>CD55</i>           | CD55 molecule (Cromer blood group)                                           |
| <i>RUNX1</i>          | runt related transcription factor 1                                          |
| <i>KMO</i>            | kynurenine 3-monooxygenase                                                   |
| <i>TBCA</i>           | tubulin folding cofactor A                                                   |
| <i>TPH1</i>           | tryptophan hydroxylase 1                                                     |
| <i>CLDN9</i>          | claudin 9                                                                    |
| <i>CALCR</i>          | calcitonin receptor                                                          |
| <i>DIS3L</i>          | DIS3 like exosome 3'-5' exoribonuclease                                      |
| <i>RP11-1399P15.1</i> |                                                                              |
| <i>GDF15</i>          | growth differentiation factor 15                                             |
| <i>MMP10</i>          | matrix metalloproteinase 10                                                  |
| <i>MAPK1</i>          | mitogen-activated protein kinase 1                                           |
| <i>CYP3A5</i>         | cytochrome P450 family 3 subfamily A member 5                                |
| <i>TFCP2L1</i>        | transcription factor CP2-like 1                                              |
| <i>RIMS2</i>          | regulating synaptic membrane exocytosis 2                                    |
| <i>BPIFA1</i>         | BPI fold containing family A member 1                                        |
| <i>ALLC</i>           | allantoicase                                                                 |
| <i>S100A6</i>         | S100 calcium binding protein A6                                              |
| <i>PPBP</i>           | pro-platelet basic protein                                                   |
| <i>MMACHC</i>         | methylmalonic aciduria (cobalamin deficiency) cblC type, with homocystinuria |
| <i>KCNE4</i>          | potassium voltage-gated channel subfamily E regulatory subunit 4             |
| <i>FADS2</i>          | fatty acid desaturase 2                                                      |
| <i>ADI1</i>           | acireductone dioxygenase 1                                                   |

|                      |                                                                                         |
|----------------------|-----------------------------------------------------------------------------------------|
| <i>BMPR2</i>         | bone morphogenetic protein receptor type 2                                              |
| <i>DLAT</i>          | dihydrolipoamide S-acetyltransferase                                                    |
| <i>NR4A1</i>         | nuclear receptor subfamily 4 group A member 1                                           |
| <i>STUB1</i>         | STIP1 homology and U-box containing protein 1                                           |
| <i>PSIP1</i>         | PC4 and SFRS1 interacting protein 1                                                     |
| <i>PTGER3</i>        | prostaglandin E receptor 3                                                              |
| <i>JAG1</i>          | jagged 1                                                                                |
| <i>FAM13C</i>        | family with sequence similarity 13 member C                                             |
| <i>RBMS3</i>         | RNA binding motif single stranded interacting protein 3                                 |
| <i>CEBPZ</i>         | CCAAT/enhancer binding protein zeta                                                     |
| <i>RP11-149123.3</i> |                                                                                         |
| <i>PRRX2</i>         | paired related homeobox 2                                                               |
| <i>PUM3</i>          | pumilio RNA binding family member 3                                                     |
| <i>AP001372.2</i>    |                                                                                         |
| <i>GAD1</i>          | glutamate decarboxylase 1                                                               |
| <i>GSR</i>           | glutathione-disulfide reductase                                                         |
| <i>RAC2</i>          | ras-related C3 botulinum toxin substrate 2 (rho family, small GTP binding protein Rac2) |
| <i>P2RY6</i>         | pyrimidinergic receptor P2Y6                                                            |
| <i>NOV</i>           | nephroblastoma overexpressed                                                            |
| <i>NRXN1</i>         | neurexin 1                                                                              |
| <i>SLC39A2</i>       | solute carrier family 39 member 2                                                       |
| <i>HPS1</i>          | HPS1, biogenesis of lysosomal organelles complex 3 subunit 1                            |
| <i>ABCB1</i>         | ATP binding cassette subfamily B member 1                                               |

|                      |                                                |
|----------------------|------------------------------------------------|
| <i>FAXDC2</i>        | fatty acid hydroxylase domain containing 2     |
| <i>SH2D1B</i>        | SH2 domain containing 1B                       |
| <i>SLC6A11</i>       | solute carrier family 6 member 11              |
| <i>CYP27B1</i>       | cytochrome P450 family 27 subfamily B member 1 |
| <i>PTPRE</i>         | protein tyrosine phosphatase, receptor type E  |
| <i>CYFIP2</i>        | cytoplasmic FMR1 interacting protein 2         |
| <i>MED24</i>         | mediator complex subunit 24                    |
| <i>PNMT</i>          | phenylethanolamine N-methyltransferase         |
| <i>AOC3</i>          | amine oxidase, copper containing 3             |
| <i>COPA</i>          | coatamer protein complex subunit alpha         |
| <i>HM13</i>          | histocompatibility minor 13                    |
| <i>NMU</i>           | neuromedin U                                   |
| <i>TRAF1</i>         | TNF receptor associated factor 1               |
| <i>SLC39A8</i>       | solute carrier family 39 member 8              |
| <i>MYL9</i>          | myosin light chain 9                           |
| <i>RP11-339N8.1</i>  |                                                |
| <i>COPS8</i>         | COP9 signalosome subunit 8                     |
| <i>RP11-483P21.2</i> |                                                |
| <i>05-Sep</i>        | septin 5                                       |
| <i>ZDHHC2</i>        | zinc finger DHHC-type containing 2             |
| <i>LMAN1</i>         | lectin, mannose binding 1                      |
| <i>FAM134B</i>       | family with sequence similarity 134 member B   |
| <i>SERPINF1</i>      | serpin family F member 1                       |

|                     |                                                        |
|---------------------|--------------------------------------------------------|
| <i>NPC1L1</i>       | NPC1 like intracellular cholesterol transporter 1      |
| <i>CCT5</i>         | chaperonin containing TCP1 subunit 5                   |
| <i>FMO2</i>         | flavin containing monooxygenase 2                      |
| <i>RP11-402P6.9</i> |                                                        |
| <i>ZBTB32</i>       | zinc finger and BTB domain containing 32               |
| <i>TALDO1</i>       | transaldolase 1                                        |
| <i>MLLT3</i>        | MLLT3, super elongation complex subunit                |
| <i>ZNF74</i>        | zinc finger protein 74                                 |
| <i>HCRT</i>         | hypocretin neuropeptide precursor                      |
| <i>ZBTB38</i>       | zinc finger and BTB domain containing 38               |
| <i>GRB10</i>        | growth factor receptor bound protein 10                |
| <i>CXorf57</i>      | chromosome X open reading frame 57                     |
| <i>CASC2</i>        | cancer susceptibility candidate 2 (non-protein coding) |
| <i>CARD16</i>       | caspase recruitment domain family member 16            |
| <i>KRT8</i>         | keratin 8                                              |
| <i>GLRB</i>         | glycine receptor beta                                  |
| <i>GJA4</i>         | gap junction protein alpha 4                           |
| <i>ITGA2B</i>       | integrin subunit alpha 2b                              |
| <i>NPY6R</i>        | neuropeptide Y receptor Y6 (pseudogene)                |
| <i>PDE4DIP</i>      | phosphodiesterase 4D interacting protein               |
| <i>GRK2</i>         | G protein-coupled receptor kinase 2                    |
| <i>PIK3C3</i>       | phosphatidylinositol 3-kinase catalytic subunit type 3 |
| <i>RAB3B</i>        | RAB3B, member RAS oncogene family                      |
| <i>DDT</i>          | D-dopachrome tautomerase                               |

|                      |                                                      |
|----------------------|------------------------------------------------------|
| <i>C4orf50</i>       | chromosome 4 open reading frame 50                   |
| <i>LENG9</i>         | leukocyte receptor cluster member 9                  |
| <i>ABCA1</i>         | ATP binding cassette subfamily A member 1            |
| <i>EVA1B</i>         | eva-1 homolog B                                      |
| <i>CFAP161</i>       | cilia and flagella associated protein 161            |
| <i>BEAN1</i>         | brain expressed, associated with NEDD4, 1            |
| <i>CAMP</i>          | cathelicidin antimicrobial peptide                   |
| <i>IQGAP1</i>        | IQ motif containing GTPase activating protein 1      |
| <i>DSE</i>           | dermatan sulfate epimerase                           |
| <i>FGF7</i>          | fibroblast growth factor 7                           |
| <i>FUS</i>           | FUS RNA binding protein                              |
| <i>WDR46</i>         | WD repeat domain 46                                  |
| <i>SMAP2</i>         | small ArfGAP2                                        |
| <i>SPTSSB</i>        | serine palmitoyltransferase small subunit B          |
| <i>ZUFSP</i>         | zinc finger with UFM1 specific peptidase domain      |
| <i>RP11-734K21.5</i> |                                                      |
| <i>ACSS1</i>         | acyl-CoA synthetase short-chain family member 1      |
| <i>PHEX</i>          | phosphate regulating endopeptidase homolog, X-linked |
| <i>PLEKHF2</i>       | pleckstrin homology and FYVE domain containing 2     |
| <i>L3MBTL4</i>       | l(3)mbt-like 4 (Drosophila)                          |
| <i>FHOD3</i>         | formin homology 2 domain containing 3                |
| <i>PITX2</i>         | paired like homeodomain 2                            |
| <i>RP11-5407.17</i>  |                                                      |

|                   |                                                                       |
|-------------------|-----------------------------------------------------------------------|
| <i>CHD6</i>       | chromodomain helicase DNA binding protein 6                           |
| <i>CNTF</i>       | ciliary neurotrophic factor                                           |
| <i>RBFOX2</i>     | RNA binding protein, fox-1 homolog 2                                  |
| <i>GIMAP5</i>     | GTPase, IMAP family member 5                                          |
| <i>GIMAP4</i>     | GTPase, IMAP family member 4                                          |
| <i>INSIG2</i>     | insulin induced gene 2                                                |
| <i>RAF1</i>       | Raf-1 proto-oncogene, serine/threonine kinase                         |
| <i>IRX3</i>       | iroquois homeobox 3                                                   |
| <i>FCER1G</i>     | Fc fragment of IgE receptor Ig                                        |
| <i>ELAVL1</i>     | ELAV like RNA binding protein 1                                       |
| <i>LRP2</i>       | LDL receptor related protein 2                                        |
| <i>PIK3CB</i>     | phosphatidylinositol-4,5-bisphosphate 3-kinase catalytic subunit beta |
| <i>EDA</i>        | ectodysplasin A                                                       |
| <i>AMN</i>        | amnion associated transmembrane protein                               |
| <i>FGF1</i>       | fibroblast growth factor 1                                            |
| <i>GRK5</i>       | G protein-coupled receptor kinase 5                                   |
| <i>CRISPLD2</i>   | cysteine rich secretory protein LCCL domain containing 2              |
| <i>PYCARD</i>     | PYD and CARD domain containing                                        |
| <i>AC093724.2</i> |                                                                       |
| <i>PRTN3</i>      | proteinase 3                                                          |
| <i>LRR73</i>      | leucine rich repeat containing 73                                     |
| <i>STAG3</i>      | stromal antigen 3                                                     |
| <i>ATG9B</i>      | autophagy related 9B                                                  |
| <i>LMBRD1</i>     | LMBR1 domain containing 1                                             |

|                      |                                                         |
|----------------------|---------------------------------------------------------|
| <i>RP11-890B15.2</i> |                                                         |
| <i>SDS</i>           | serine dehydratase                                      |
| <i>DES</i>           | desmin                                                  |
| <i>SLC16A2</i>       | solute carrier family 16 member 2                       |
| <i>CDCA7</i>         | cell division cycle associated 7                        |
| <i>HLA-DPB1</i>      | major histocompatibility complex, class II, DP beta 1   |
| <i>CTF1</i>          | cardiotrophin 1                                         |
| <i>SMIM21</i>        | small integral membrane protein 21                      |
| <i>HBE1</i>          | hemoglobin subunit epsilon 1                            |
| <i>EFCAB11</i>       | EF-hand calcium binding domain 11                       |
| <i>CTC-241N9.1</i>   |                                                         |
| <i>RAB30</i>         | RAB30, member RAS oncogene family                       |
| <i>CACNG4</i>        | calcium voltage-gated channel auxiliary subunit gamma 4 |
| <i>CD58</i>          | CD58 molecule                                           |
| <i>C11orf52</i>      | chromosome 11 open reading frame 52                     |
| <i>NPAT</i>          | nuclear protein, coactivator of histone transcription   |
| <i>SLC25A20</i>      | solute carrier family 25 member 20                      |
| <i>GAP43</i>         | growth associated protein 43                            |
| <i>ALPK1</i>         | alpha kinase 1                                          |
| <i>USO1</i>          | USO1 vesicle transport factor                           |
| <i>SPRN</i>          | shadow of prion protein homolog (zebrafish)             |
| <i>SEC14L2</i>       | SEC14 like lipid binding 2                              |
| <i>CEBPD</i>         | CCAAT/enhancer binding protein delta                    |

|                     |                                                            |
|---------------------|------------------------------------------------------------|
| <i>RP11-30015.1</i> |                                                            |
| <i>PDC</i>          | phosducin                                                  |
| <i>MUT</i>          | methylmalonyl-CoA mutase                                   |
| <i>CAND2</i>        | cullin associated and neddylation dissociated 2 (putative) |
| <i>CNRIP1</i>       | cannabinoid receptor interacting protein 1                 |
| <i>LINC01515</i>    | long intergenic non-protein coding RNA 1515                |
| <i>ERAP2</i>        | endoplasmic reticulum aminopeptidase 2                     |
| <i>NANOS2</i>       | nanos C2HC-type zinc finger 2                              |
| <i>CORT</i>         | cortistatin                                                |
| <i>TPRXL</i>        | tetrapeptide repeat homeobox like                          |
| <i>UMODL1-AS1</i>   | UMODL1 antisense RNA 1                                     |
| <i>CCL25</i>        | C-C motif chemokine ligand 25                              |
| <i>KIFC1</i>        | kinesin family member C1                                   |
| <i>MAS1</i>         | MAS1 proto-oncogene, G protein-coupled receptor            |
| <i>MC5R</i>         | melanocortin 5 receptor                                    |
| <i>TEF</i>          | TEF, PAR bZIP transcription factor                         |
| <i>RUNX1T1</i>      | RUNX1 translocation partner 1                              |
| <i>CHML</i>         | CHM like, Rab escort protein 2                             |
| <i>HRG</i>          | histidine rich glycoprotein                                |
| <i>PTGES</i>        | prostaglandin E synthase                                   |
| <i>CYCS</i>         | cytochrome c, somatic                                      |
| <i>CALR</i>         | calreticulin                                               |
| <i>PAEP</i>         | progesterone associated endometrial protein                |

|                     |                                                            |
|---------------------|------------------------------------------------------------|
| <i>CHRNA2</i>       | cholinergic receptor nicotinic alpha 2 subunit             |
| <i>HS2ST1</i>       | heparan sulfate 2-O-sulfotransferase 1                     |
| <i>MB21D1</i>       | Mab-21 domain containing 1                                 |
| <i>RP11-856M7.6</i> |                                                            |
| <i>CD164L2</i>      | CD164 molecule like 2                                      |
| <i>ADAMTS1</i>      | ADAM metalloproteinase with thrombospondin type 1 motif 1  |
| <i>DNASE1L3</i>     | deoxyribonuclease 1 like 3                                 |
| <i>COL3A1</i>       | collagen type III alpha 1 chain                            |
| <i>CLEC10A</i>      | C-type lectin domain family 10 member A                    |
| <i>NUFIP2</i>       | NUFIP2, FMR1 interacting protein 2                         |
| <i>HIST1H4H</i>     | histone cluster 1, H4h                                     |
| <i>ZFR</i>          | zinc finger RNA binding protein                            |
| <i>FRMD6</i>        | FERM domain containing 6                                   |
| <i>NAAA</i>         | N-acyl ethanolamine acid amidase                           |
| <i>PIM1</i>         | Pim-1 proto-oncogene, serine/threonine kinase              |
| <i>CDH5</i>         | cadherin 5                                                 |
| <i>ACVR1</i>        | activin A receptor type 1                                  |
| <i>NNT</i>          | nicotinamide nucleotide transhydrogenase                   |
| <i>POLR2A</i>       | RNA polymerase II subunit A                                |
| <i>SLCO2B1</i>      | solute carrier organic anion transporter family member 2B1 |
| <i>SFTPA2</i>       | surfactant protein A2                                      |
| <i>NRG2</i>         | neuregulin 2                                               |
| <i>SIPA1L1</i>      | signal induced proliferation associated 1 like 1           |

|                      |                                                  |
|----------------------|--------------------------------------------------|
| <i>CTD-2047H16.4</i> |                                                  |
| <i>CLEC6A</i>        | C-type lectin domain family 6 member A           |
| <i>USP51</i>         | ubiquitin specific peptidase 51                  |
| <i>KIAA1257</i>      | KIAA1257                                         |
| <i>FFAR3</i>         | free fatty acid receptor 3                       |
| <i>INHBA</i>         | inhibin beta A subunit                           |
| <i>FCGR1A</i>        | Fc fragment of IgG receptor Ia                   |
| <i>EBI3</i>          | Epstein-Barr virus induced 3                     |
| <i>MUC16</i>         | mucin 16, cell surface associated                |
| <i>LTBR</i>          | lymphotoxin beta receptor                        |
| <i>SUSD3</i>         | sushi domain containing 3                        |
| <i>SETD2</i>         | SET domain containing 2                          |
| <i>GPR155</i>        | G protein-coupled receptor 155                   |
| <i>TNFRSF1B</i>      | TNF receptor superfamily member 1B               |
| <i>BPHL</i>          | biphenyl hydrolase like                          |
| <i>MAP3K1</i>        | mitogen-activated protein kinase kinase kinase 1 |
| <i>IL20RA</i>        | interleukin 20 receptor subunit alpha            |
| <i>IL20RB</i>        | interleukin 20 receptor subunit beta             |
| <i>ORMDL1</i>        | ORMDL sphingolipid biosynthesis regulator 1      |
| <i>AHSP</i>          | alpha hemoglobin stabilizing protein             |
| <i>TAC4</i>          | tachykinin 4 (hemokinin)                         |
| <i>GZMK</i>          | granzyme K                                       |
| <i>CYLD</i>          | CYLD lysine 63 deubiquitinase                    |
| <i>CYP1B1</i>        | cytochrome P450 family 1 subfamily B member 1    |

|                |                                                        |
|----------------|--------------------------------------------------------|
| <i>HTR3A</i>   | 5-hydroxytryptamine receptor 3A                        |
| <i>UGT1A3</i>  | UDP glucuronosyltransferase family 1 member A3         |
| <i>ZIC3</i>    | Zic family member 3                                    |
| <i>STMN4</i>   | stathmin 4                                             |
| <i>TCTA</i>    | T-cell leukemia translocation altered                  |
| <i>PRDX5</i>   | peroxiredoxin 5                                        |
| <i>PSMD3</i>   | proteasome 26S subunit, non-ATPase 3                   |
| <i>PRMT5</i>   | protein arginine methyltransferase 5                   |
| <i>ADIPOQ</i>  | adiponectin, C1Q and collagen domain containing        |
| <i>GATA1</i>   | GATA binding protein 1                                 |
| <i>HAND1</i>   | heart and neural crest derivatives expressed 1         |
| <i>PRMT2</i>   | protein arginine methyltransferase 2                   |
| <i>ORMDL2</i>  | ORMDL sphingolipid biosynthesis regulator 2            |
| <i>ILK</i>     | integrin linked kinase                                 |
| <i>TAB1</i>    | TGF-beta activated kinase 1 (MAP3K7) binding protein 1 |
| <i>GRAP2</i>   | GRB2-related adaptor protein 2                         |
| <i>CBR1</i>    | carbonyl reductase 1                                   |
| <i>MAOA</i>    | monoamine oxidase A                                    |
| <i>UGT1A1</i>  | UDP glucuronosyltransferase family 1 member A1         |
| <i>MRI1</i>    | methylthioribose-1-phosphate isomerase 1               |
| <i>RAP1GAP</i> | RAP1 GTPase activating protein                         |
| <i>TAC3</i>    | tachykinin 3                                           |
| <i>NAP1L4</i>  | nucleosome assembly protein 1 like 4                   |
| <i>PXN</i>     | paxillin                                               |
| <i>ANXA4</i>   | annexin A4                                             |

|                      |                                                           |
|----------------------|-----------------------------------------------------------|
| <i>ADAM17</i>        | ADAM metallopeptidase domain 17                           |
| <i>IP6K3</i>         | inositol hexakisphosphate kinase 3                        |
| <i>NOS1</i>          | nitric oxide synthase 1                                   |
| <i>RP11-38L15.3</i>  |                                                           |
| <i>FTO</i>           | fat mass and obesity associated                           |
| <i>F2</i>            | coagulation factor II, thrombin                           |
| <i>RXFP1</i>         | relaxin/insulin like family peptide receptor 1            |
| <i>C1QTNF1</i>       | C1q and tumor necrosis factor related protein 1           |
| <i>OCLN</i>          | occludin                                                  |
| <i>FAM13A</i>        | family with sequence similarity 13 member A               |
| <i>BACH2</i>         | BTB domain and CNC homolog 2                              |
| <i>CARD10</i>        | caspase recruitment domain family member 10               |
| <i>ERICH5</i>        | glutamate rich 5                                          |
| <i>RP11-661D19.3</i> |                                                           |
| <i>RP11-67L2.2</i>   |                                                           |
| <i>AQP7</i>          | aquaporin 7                                               |
| <i>FOS</i>           | Fos proto-oncogene, AP-1 transcription factor subunit     |
| <i>RNPEP</i>         | arginyl aminopeptidase                                    |
| <i>TMEM11</i>        | transmembrane protein 11                                  |
| <i>TGFB3</i>         | transforming growth factor beta 3                         |
| <i>HLA-K</i>         | major histocompatibility complex, class I, K (pseudogene) |
| <i>LINC00997</i>     | long intergenic non-protein coding RNA 997                |
| <i>CD36</i>          | CD36 molecule                                             |

|                 |                                                    |
|-----------------|----------------------------------------------------|
| <i>ASCC1</i>    | activating signal cointegrator 1 complex subunit 1 |
| <i>HPRT1</i>    | hypoxanthine phosphoribosyltransferase 1           |
| <i>CFD</i>      | complement factor D                                |
| <i>CAMK4</i>    | calcium/calmodulin dependent protein kinase IV     |
| <i>GHR</i>      | growth hormone receptor                            |
| <i>TMEM143</i>  | transmembrane protein 143                          |
| <i>SUOX</i>     | sulfite oxidase                                    |
| <i>PIR</i>      | pirin                                              |
| <i>STAG2</i>    | stromal antigen 2                                  |
| <i>NUCB2</i>    | nucleobindin 2                                     |
| <i>NR1H3</i>    | nuclear receptor subfamily 1 group H member 3      |
| <i>PVALB</i>    | parvalbumin                                        |
| <i>ZNF862</i>   | zinc finger protein 862                            |
| <i>SCT</i>      | secretin                                           |
| <i>SLC25A10</i> | solute carrier family 25 member 10                 |
| <i>KRT5</i>     | keratin 5                                          |
| <i>FHL2</i>     | four and a half LIM domains 2                      |
| <i>FNTB</i>     | farnesyltransferase, CAAX box, beta                |
| <i>RHO</i>      | rhodopsin                                          |
| <i>TBP</i>      | TATA-box binding protein                           |
| <i>IL6ST</i>    | interleukin 6 signal transducer                    |
| <i>LSM14B</i>   | LSM family member 14B                              |
| <i>ATL3</i>     | atlastin GTPase 3                                  |
| <i>ACADM</i>    | acyl-CoA dehydrogenase, C-4 to C-12 straight chain |
| <i>GSC</i>      | goosecoid homeobox                                 |

|                     |                                                               |
|---------------------|---------------------------------------------------------------|
| <i>EP300</i>        | E1A binding protein p300                                      |
| <i>KPNA2</i>        | karyopherin subunit alpha 2                                   |
| <i>SKAP2</i>        | src kinase associated phosphoprotein 2                        |
| <i>SGCA</i>         | sarcoglycan alpha                                             |
| <i>EFCAB14</i>      | EF-hand calcium binding domain 14                             |
| <i>KLK3</i>         | kallikrein related peptidase 3                                |
| <i>OXGR1</i>        | oxoglutarate receptor 1                                       |
| <i>FAM27C</i>       | family with sequence similarity 27 member C                   |
| <i>10-Mar</i>       | membrane associated ring-CH-type finger 10                    |
| <i>FAM81A</i>       | family with sequence similarity 81 member A                   |
| <i>HCG4B</i>        | HLA complex group 4B (non-protein coding)                     |
| <i>AKT1</i>         | AKT serine/threonine kinase 1                                 |
| <i>GGT1</i>         | gamma-glutamyltransferase 1                                   |
| <i>CYP2E1</i>       | cytochrome P450 family 2 subfamily E member 1                 |
| <i>LINC01137</i>    | long intergenic non-protein coding RNA 1137                   |
| <i>AC009133.12</i>  |                                                               |
| <i>MYC</i>          | v-myc avian myelocytomatosis viral oncogene homolog           |
| <i>RP11-119D9.1</i> |                                                               |
| <i>NAGA</i>         | alpha-N-acetylgalactosaminidase                               |
| <i>OR7E122P</i>     | olfactory receptor family 7 subfamily E member 122 pseudogene |
| <i>SPRR2A</i>       | small proline rich protein 2A                                 |
| <i>SLC22A4</i>      | solute carrier family 22 member 4                             |
| <i>FAM131A</i>      | family with sequence similarity 131 member A                  |
| <i>IL17RC</i>       | interleukin 17 receptor C                                     |

|                      |                                                                                          |
|----------------------|------------------------------------------------------------------------------------------|
| <i>PROC</i>          | protein C, inactivator of coagulation factors Va and VIIIa                               |
| <i>CD207</i>         | CD207 molecule                                                                           |
| <i>C3</i>            | complement C3                                                                            |
| <i>IL31RA</i>        | interleukin 31 receptor A                                                                |
| <i>HMGN4</i>         | high mobility group nucleosomal binding domain 4                                         |
| <i>TRPC6</i>         | transient receptor potential cation channel subfamily C member 6                         |
| <i>AGT</i>           | angiotensinogen                                                                          |
| <i>ALOX12</i>        | arachidonate 12-lipoxygenase, 12S type                                                   |
| <i>ATP5A1P5</i>      | ATP synthase, H+ transporting, mitochondrial F1 complex, alpha subunit 1<br>pseudogene 5 |
| <i>GBP7</i>          | guanylate binding protein 7                                                              |
| <i>AC002511.2</i>    |                                                                                          |
| <i>TMEM45A</i>       | transmembrane protein 45A                                                                |
| <i>ANKRD33B</i>      | ankyrin repeat domain 33B                                                                |
| <i>EPAS1</i>         | endothelial PAS domain protein 1                                                         |
| <i>MCIDAS</i>        | multiciliate differentiation and DNA synthesis associated cell cycle protein             |
| <i>NXP1</i>          | neurexophilin 1                                                                          |
| <i>CPS1</i>          | carbamoyl-phosphate synthase 1                                                           |
| <i>CNIH2</i>         | cornichon family AMPA receptor auxiliary protein 2                                       |
| <i>LINC00890</i>     | long intergenic non-protein coding RNA 890                                               |
| <i>RP11-161H23.9</i> |                                                                                          |
| <i>G6PD</i>          | glucose-6-phosphate dehydrogenase                                                        |
| <i>ERP27</i>         | endoplasmic reticulum protein 27                                                         |
| <i>LRG1</i>          | leucine rich alpha-2-glycoprotein 1                                                      |

|                      |                                                        |
|----------------------|--------------------------------------------------------|
| <i>FOLR2</i>         | folate receptor beta                                   |
| <i>VIPR2</i>         | vasoactive intestinal peptide receptor 2               |
| <i>KNG1</i>          | kininogen 1                                            |
| <i>WFDC2</i>         | WAP four-disulfide core domain 2                       |
| <i>CA1</i>           | carbonic anhydrase 1                                   |
| <i>CXCL6</i>         | C-X-C motif chemokine ligand 6                         |
| <i>PROCR</i>         | protein C receptor                                     |
| <i>RP11-640L9.2</i>  |                                                        |
| <i>TINCR</i>         | tissue differentiation-inducing non-protein coding RNA |
| <i>ABCC6P2</i>       | ATP binding cassette subfamily C member 6 pseudogene 2 |
| <i>RP11-640L9.1</i>  |                                                        |
| <i>EPCAM</i>         | epithelial cell adhesion molecule                      |
| <i>LRR1Q3</i>        | leucine rich repeats and IQ motif containing 3         |
| <i>ZBED5</i>         | zinc finger BED-type containing 5                      |
| <i>RP11-345J18.2</i> |                                                        |
| <i>COL28A1</i>       | collagen type XXVIII alpha 1 chain                     |
| <i>PARK7</i>         | Parkinsonism associated deglycase                      |
| <i>EIF6</i>          | eukaryotic translation initiation factor 6             |
| <i>UCHL1</i>         | ubiquitin C-terminal hydrolase L1                      |
| <i>NTRK3</i>         | neurotrophic receptor tyrosine kinase 3                |
| <i>PRDX6</i>         | peroxiredoxin 6                                        |
| <i>PRL</i>           | prolactin                                              |

|                     |                                                      |
|---------------------|------------------------------------------------------|
| <i>CPD</i>          | carboxypeptidase D                                   |
| <i>ICAM3</i>        | intercellular adhesion molecule 3                    |
| <i>FRMD4A</i>       | FERM domain containing 4A                            |
| <i>LINC00964</i>    | long intergenic non-protein coding RNA 964           |
| <i>RP11-46H11.3</i> |                                                      |
| <i>C2orf66</i>      | chromosome 2 open reading frame 66                   |
| <i>GPR85</i>        | G protein-coupled receptor 85                        |
| <i>IVNS1ABP</i>     | influenza virus NS1A binding protein                 |
| <i>TNFSF15</i>      | tumor necrosis factor superfamily member 15          |
| <i>GNRHR</i>        | gonadotropin releasing hormone receptor              |
| <i>CREBBP</i>       | CREB binding protein                                 |
| <i>IL1RAP</i>       | interleukin 1 receptor accessory protein             |
| <i>AIFM1</i>        | apoptosis inducing factor, mitochondria associated 1 |
| <i>PDE7A</i>        | phosphodiesterase 7A                                 |
| <i>ADH1B</i>        | alcohol dehydrogenase 1B (class I), beta polypeptide |
| <i>P4HB</i>         | prolyl 4-hydroxylase subunit beta                    |
| <i>SCARA3</i>       | scavenger receptor class A member 3                  |
| <i>DDX41</i>        | DEAD-box helicase 41                                 |
| <i>RP11-36817.4</i> |                                                      |
| <i>IGHG3</i>        | immunoglobulin heavy constant gamma 3 (G3m marker)   |
| <i>SERPINA5</i>     | serpin family A member 5                             |
| <i>PTCHD3</i>       | patched domain containing 3                          |
| <i>AQP4</i>         | aquaporin 4                                          |

|                 |                                                      |
|-----------------|------------------------------------------------------|
| <i>GNPDA2</i>   | glucosamine-6-phosphate deaminase 2                  |
| <i>IGHG1</i>    | immunoglobulin heavy constant gamma 1 (G1m marker)   |
| <i>TGFBR1</i>   | transforming growth factor beta receptor 1           |
| <i>SIGLEC14</i> | sialic acid binding Ig like lectin 14                |
| <i>RFX1</i>     | regulatory factor X1                                 |
| <i>SLC19A1</i>  | solute carrier family 19 member 1                    |
| <i>KRT13</i>    | keratin 13                                           |
| <i>AKR1C1</i>   | aldo-keto reductase family 1 member C1               |
| <i>TMX1</i>     | thioredoxin related transmembrane protein 1          |
| <i>SNRNP35</i>  | small nuclear ribonucleoprotein U11/U12 subunit 35   |
| <i>PRNP</i>     | prion protein                                        |
| <i>ATF6</i>     | activating transcription factor 6                    |
| <i>ZBTB12</i>   | zinc finger and BTB domain containing 12             |
| <i>MORN4</i>    | MORN repeat containing 4                             |
| <i>RRP15</i>    | ribosomal RNA processing 15 homolog                  |
| <i>BNIP3P11</i> | BCL2 interacting protein 3 pseudogene 11             |
| <i>CPNE5</i>    | copine 5                                             |
| <i>RASA1</i>    | RAS p21 protein activator 1                          |
| <i>ERBB2</i>    | erb-b2 receptor tyrosine kinase 2                    |
| <i>GATA2</i>    | GATA binding protein 2                               |
| <i>DEXI</i>     | Dexi homolog                                         |
| <i>AGER</i>     | advanced glycosylation end-product specific receptor |
| <i>PLCL1</i>    | phospholipase C like 1                               |
| <i>PDE10A</i>   | phosphodiesterase 10A                                |
| <i>CHGA</i>     | chromogranin A                                       |

|                  |                                                                 |
|------------------|-----------------------------------------------------------------|
| <i>ROBO1</i>     | roundabout guidance receptor 1                                  |
| <i>HNF1A</i>     | HNF1 homeobox A                                                 |
| <i>MEN1</i>      | menin 1                                                         |
| <i>FLT3</i>      | fms related tyrosine kinase 3                                   |
| <i>NRF1</i>      | nuclear respiratory factor 1                                    |
| <i>MS4A3</i>     | membrane spanning 4-domains A3                                  |
| <i>CHST1</i>     | carbohydrate sulfotransferase 1                                 |
| <i>SULT2A1</i>   | sulfotransferase family 2A member 1                             |
| <i>HPX</i>       | hemopexin                                                       |
| <i>GGACT</i>     | gamma-glutamylamine cyclotransferase                            |
| <i>DHX9</i>      | DEAH-box helicase 9                                             |
| <i>LPP</i>       | LIM domain containing preferred translocation partner in lipoma |
| <i>ITLN2</i>     | intelectin 2                                                    |
| <i>KL</i>        | klotho                                                          |
| <i>FSCN1</i>     | fascin actin-bundling protein 1                                 |
| <i>SPINT2</i>    | serine peptidase inhibitor, Kunitz type 2                       |
| <i>KRTAP1-1</i>  | keratin associated protein 1-1                                  |
| <i>PSMA7</i>     | proteasome subunit alpha 7                                      |
| <i>C14orf166</i> | chromosome 14 open reading frame 166                            |
| <i>FAM168B</i>   | family with sequence similarity 168 member B                    |
| <i>LINC00665</i> | long intergenic non-protein coding RNA 665                      |
| <i>RNASE1</i>    | ribonuclease A family member 1, pancreatic                      |
| <i>PLA2G4C</i>   | phospholipase A2 group IVC                                      |
| <i>RAB43</i>     | RAB43, member RAS oncogene family                               |
| <i>AQP4-AS1</i>  | AQP4 antisense RNA 1                                            |

|                     |                                                                      |
|---------------------|----------------------------------------------------------------------|
| <i>HOXB2</i>        | homeobox B2                                                          |
| <i>RP1-228H13.5</i> |                                                                      |
| <i>PLK1</i>         | polo like kinase 1                                                   |
| <i>WT1</i>          | Wilms tumor 1                                                        |
| <i>RGS3</i>         | regulator of G-protein signaling 3                                   |
| <i>RHCE</i>         | Rh blood group CcEe antigens                                         |
| <i>ART1</i>         | ADP-ribosyltransferase 1                                             |
| <i>EBF1</i>         | early B-cell factor 1                                                |
| <i>CLYBL</i>        | citrate lyase beta like                                              |
| <i>CSK</i>          | c-src tyrosine kinase                                                |
| <i>SLC30A4</i>      | solute carrier family 30 member 4                                    |
| <i>VIM</i>          | vimentin                                                             |
| <i>CENPF</i>        | centromere protein F                                                 |
| <i>ACTR3B</i>       | ARP3 actin related protein 3 homolog B                               |
| <i>GIPC2</i>        | GIPC PDZ domain containing family member 2                           |
| <i>KEAP1</i>        | kelch like ECH associated protein 1                                  |
| <i>OXTR</i>         | oxytocin receptor                                                    |
| <i>ARL10</i>        | ADP ribosylation factor like GTPase 10                               |
| <i>PPM1E</i>        | protein phosphatase, Mg <sup>2+</sup> /Mn <sup>2+</sup> dependent 1E |
| <i>TPRG1</i>        | tumor protein p63 regulated 1                                        |
| <i>MTSS1</i>        | MTSS1, I-BAR domain containing                                       |
| <i>TRIT1</i>        | tRNA isopentenyltransferase 1                                        |
| <i>FBXW11</i>       | F-box and WD repeat domain containing 11                             |
| <i>DOCK8</i>        | dedicator of cytokinesis 8                                           |

|                  |                                                 |
|------------------|-------------------------------------------------|
| <i>MGST2</i>     | microsomal glutathione S-transferase 2          |
| <i>VLDLR</i>     | very low density lipoprotein receptor           |
| <i>KRT37</i>     | keratin 37                                      |
| <i>TNFRSF11B</i> | TNF receptor superfamily member 11b             |
| <i>CD70</i>      | CD70 molecule                                   |
| <i>ABCC2</i>     | ATP binding cassette subfamily C member 2       |
| <i>AKR1C3</i>    | aldo-keto reductase family 1 member C3          |
| <i>TNFSF8</i>    | tumor necrosis factor superfamily member 8      |
| <i>TSC1</i>      | tuberous sclerosis 1                            |
| <i>ERICH2</i>    | glutamate rich 2                                |
| <i>PDGFRL</i>    | platelet derived growth factor receptor like    |
| <i>FOLR1</i>     | folate receptor 1                               |
| <i>FXN</i>       | frataxin                                        |
| <i>MOCS3</i>     | molybdenum cofactor synthesis 3                 |
| <i>HSPA5</i>     | heat shock protein family A (Hsp70) member 5    |
| <i>CIB2</i>      | calcium and integrin binding family member 2    |
| <i>TMCO5A</i>    | transmembrane and coiled-coil domains 5A        |
| <i>PAQR7</i>     | progesterin and adipoQ receptor family member 7 |
| <i>MYH16</i>     | myosin heavy chain 16 pseudogene                |
| <i>DOK7</i>      | docking protein 7                               |
| <i>KLK5</i>      | kallikrein related peptidase 5                  |
| <i>DKK1</i>      | dickkopf WNT signaling pathway inhibitor 1      |
| <i>PPEF2</i>     | protein phosphatase with EF-hand domain 2       |
| <i>PLN</i>       | phospholamban                                   |
| <i>JAML</i>      | junction adhesion molecule like                 |

|                      |                                                       |
|----------------------|-------------------------------------------------------|
| <i>DNMT3A</i>        | DNA methyltransferase 3 alpha                         |
| <i>DAPK3</i>         | death associated protein kinase 3                     |
| <i>XPNPEP1</i>       | X-prolyl aminopeptidase 1                             |
| <i>NEB</i>           | nebulin                                               |
| <i>SIGLEC10</i>      | sialic acid binding Ig like lectin 10                 |
| <i>SRGN</i>          | serglycin                                             |
| <i>TIGIT</i>         | T-cell immunoreceptor with Ig and ITIM domains        |
| <i>KLRK1</i>         | killer cell lectin like receptor K1                   |
| <i>VIT</i>           | vitrin                                                |
| <i>GNPDA1</i>        | glucosamine-6-phosphate deaminase 1                   |
| <i>C9orf24</i>       | chromosome 9 open reading frame 24                    |
| <i>FPR1</i>          | formyl peptide receptor 1                             |
| <i>SUV39H1</i>       | suppressor of variegation 3-9 homolog 1               |
| <i>TIA1</i>          | TIA1 cytotoxic granule-associated RNA binding protein |
| <i>EFCAB5</i>        | EF-hand calcium binding domain 5                      |
| <i>RN7SL834P</i>     | RNA, 7SL, cytoplasmic 834, pseudogene                 |
| <i>SLC6A4</i>        | solute carrier family 6 member 4                      |
| <i>CTD-2047H16.3</i> |                                                       |
| <i>RP3-523K23.2</i>  |                                                       |
| <i>WBSCR17</i>       | Williams-Beuren syndrome chromosome region 17         |
| <i>KIAA1211</i>      | KIAA1211                                              |
| <i>RPARP-AS1</i>     | RPARP antisense RNA 1                                 |
| <i>IL18RAP</i>       | interleukin 18 receptor accessory protein             |

|                      |                                                              |
|----------------------|--------------------------------------------------------------|
| <i>PTPRU</i>         | protein tyrosine phosphatase, receptor type U                |
| <i>RP11-177C12.1</i> |                                                              |
| <i>KCNQ5</i>         | potassium voltage-gated channel subfamily Q member 5         |
| <i>PCBD1</i>         | pterin-4 alpha-carbinolamine dehydratase 1                   |
| <i>INSR</i>          | insulin receptor                                             |
| <i>ZP3</i>           | zona pellucida glycoprotein 3                                |
| <i>SATB1</i>         | SATB homeobox 1                                              |
| <i>PNP</i>           | purine nucleoside phosphorylase                              |
| <i>TREM2</i>         | triggering receptor expressed on myeloid cells 2             |
| <i>LILRB4</i>        | leukocyte immunoglobulin like receptor B4                    |
| <i>DBT</i>           | dihydrolipoamide branched chain transacylase E2              |
| <i>ERCC8</i>         | ERCC excision repair 8, CSA ubiquitin ligase complex subunit |
| <i>PSEN2</i>         | presenilin 2                                                 |
| <i>DUSP3</i>         | dual specificity phosphatase 3                               |
| <i>EPPIN</i>         | epididymal peptidase inhibitor                               |
| <i>LINC00623</i>     | long intergenic non-protein coding RNA 623                   |
| <i>RP11-620J15.3</i> |                                                              |
| <i>GIPR</i>          | gastric inhibitory polypeptide receptor                      |
| <i>GALT</i>          | galactose-1-phosphate uridylyltransferase                    |
| <i>GABRQ</i>         | gamma-aminobutyric acid type A receptor theta subunit        |
| <i>ZNF382</i>        | zinc finger protein 382                                      |
| <i>CBX7</i>          | chromobox 7                                                  |
| <i>IFNL4</i>         | interferon lambda 4 (gene/pseudogene)                        |

|                |                                                                             |
|----------------|-----------------------------------------------------------------------------|
| <i>RASD1</i>   | ras related dexamethasone induced 1                                         |
| <i>TFF1</i>    | trefoil factor 1                                                            |
| <i>TXNRD3</i>  | thioredoxin reductase 3                                                     |
| <i>EPB41L3</i> | erythrocyte membrane protein band 4.1 like 3                                |
| <i>MATN1</i>   | matrilin 1, cartilage matrix protein                                        |
| <i>ACPP</i>    | acid phosphatase, prostate                                                  |
| <i>BTLA</i>    | B and T lymphocyte associated                                               |
| <i>FUCA1</i>   | fucosidase, alpha-L- 1, tissue                                              |
| <i>TYK2</i>    | tyrosine kinase 2                                                           |
| <i>MTA2</i>    | metastasis associated 1 family member 2                                     |
| <i>NPY4R</i>   | neuropeptide Y receptor Y4                                                  |
| <i>SETDB2</i>  | SET domain bifurcated 2                                                     |
| <i>CALCB</i>   | calcitonin related polypeptide beta                                         |
| <i>ENPEP</i>   | glutamyl aminopeptidase                                                     |
| <i>SGK1</i>    | serum/glucocorticoid regulated kinase 1                                     |
| <i>DLL4</i>    | delta like canonical Notch ligand 4                                         |
| <i>PDXK</i>    | pyridoxal (pyridoxine, vitamin B6) kinase                                   |
| <i>CERS2</i>   | ceramide synthase 2                                                         |
| <i>PLD1</i>    | phospholipase D1                                                            |
| <i>KLF5</i>    | Kruppel like factor 5                                                       |
| <i>STX4</i>    | syntaxin 4                                                                  |
| <i>LVRN</i>    | laeverin                                                                    |
| <i>PDE5A</i>   | phosphodiesterase 5A                                                        |
| <i>GPR65</i>   | G protein-coupled receptor 65                                               |
| <i>PKD1P6</i>  | polycystin 1, transient receptor potential channel interacting pseudogene 6 |

|                |                                                                         |
|----------------|-------------------------------------------------------------------------|
| <i>SIGLEC1</i> | sialic acid binding Ig like lectin 1                                    |
| <i>C2CD4A</i>  | C2 calcium dependent domain containing 4A                               |
| <i>ZNF215</i>  | zinc finger protein 215                                                 |
| <i>ZC2HC1C</i> | zinc finger C2HC-type containing 1C                                     |
| <i>FBXO27</i>  | F-box protein 27                                                        |
| <i>CNR2</i>    | cannabinoid receptor 2                                                  |
| <i>FANCC</i>   | Fanconi anemia complementation group C                                  |
| <i>IK</i>      | IK cytokine, down-regulator of HLA II                                   |
| <i>CTSH</i>    | cathepsin H                                                             |
| <i>PPRC1</i>   | peroxisome proliferator-activated receptor gamma, coactivator-related 1 |
| <i>TAS2R14</i> | taste 2 receptor member 14                                              |
| <i>QDPR</i>    | quinoid dihydropteridine reductase                                      |
| <i>LSR</i>     | lipolysis stimulated lipoprotein receptor                               |
| <i>CHI3L2</i>  | chitinase 3 like 2                                                      |
| <i>DDAH2</i>   | dimethylarginine dimethylaminohydrolase 2                               |
| <i>GSTT2B</i>  | glutathione S-transferase theta 2B (gene/pseudogene)                    |
| <i>DPCR1</i>   | diffuse panbronchiolitis critical region 1                              |
| <i>LELP1</i>   | late cornified envelope like proline rich 1                             |
| <i>C4A</i>     | complement C4A (Rodgers blood group)                                    |
| <i>HSPA1B</i>  | heat shock protein family A (Hsp70) member 1B                           |
| <i>FUCA2</i>   | fucosidase, alpha-L- 2, plasma                                          |
| <i>NOTCH2</i>  | notch 2                                                                 |
| <i>PSD4</i>    | pleckstrin and Sec7 domain containing 4                                 |
| <i>FCN2</i>    | ficolin 2                                                               |
| <i>PTK2</i>    | protein tyrosine kinase 2                                               |

|                      |                                                         |
|----------------------|---------------------------------------------------------|
| <i>SPRED1</i>        | sprouty related EVH1 domain containing 1                |
| <i>ACD</i>           | adrenocortical dysplasia homolog                        |
| <i>NFKBIB</i>        | NFKB inhibitor beta                                     |
| <i>ST5</i>           | suppression of tumorigenicity 5                         |
| <i>CYLC1</i>         | cylicin 1                                               |
| <i>CELA1</i>         | chymotrypsin like elastase family member 1              |
| <i>INA</i>           | internexin neuronal intermediate filament protein alpha |
| <i>LTB4R2</i>        | leukotriene B4 receptor 2                               |
| <i>TNFRSF14</i>      | TNF receptor superfamily member 14                      |
| <i>ZNRD1</i>         | zinc ribbon domain containing 1                         |
| <i>EFS</i>           | embryonal Fyn-associated substrate                      |
| <i>RAB27A</i>        | RAB27A, member RAS oncogene family                      |
| <i>KCTD7</i>         | potassium channel tetramerization domain containing 7   |
| <i>TMEM217</i>       | transmembrane protein 217                               |
| <i>KNOP1</i>         | lysine rich nucleolar protein 1                         |
| <i>C16orf54</i>      | chromosome 16 open reading frame 54                     |
| <i>AR</i>            | androgen receptor                                       |
| <i>MINA</i>          | MYC induced nuclear antigen                             |
| <i>PPP1R42</i>       | protein phosphatase 1 regulatory subunit 42             |
| <i>RAB3A</i>         | RAB3A, member RAS oncogene family                       |
| <i>CH17-189H20.1</i> |                                                         |
| <i>NOMO1</i>         | NODAL modulator 1                                       |
| <i>CHDH</i>          | choline dehydrogenase                                   |
| <i>CHRNA5</i>        | cholinergic receptor nicotinic alpha 5 subunit          |

|                 |                                                                |
|-----------------|----------------------------------------------------------------|
| <i>OBSCN</i>    | obscurin, cytoskeletal calmodulin and titin-interacting RhoGEF |
| <i>SLC38A5</i>  | solute carrier family 38 member 5                              |
| <i>SMN1</i>     | survival of motor neuron 1, telomeric                          |
| <i>ZMYM2</i>    | zinc finger MYM-type containing 2                              |
| <i>FOSL1</i>    | FOS like 1, AP-1 transcription factor subunit                  |
| <i>LCN1</i>     | lipocalin 1                                                    |
| <i>HYAL1</i>    | hyaluronoglucosaminidase 1                                     |
| <i>KLRF1</i>    | killer cell lectin like receptor F1                            |
| <i>CD9</i>      | CD9 molecule                                                   |
| <i>PIN1</i>     | peptidylprolyl cis/trans isomerase, NIMA-interacting 1         |
| <i>MTM1</i>     | myotubularin 1                                                 |
| <i>NFKBIL1</i>  | NFKB inhibitor like 1                                          |
| <i>TBK1</i>     | TANK binding kinase 1                                          |
| <i>RPLP0</i>    | ribosomal protein lateral stalk subunit P0                     |
| <i>SCGB1D4</i>  | secretoglobin family 1D member 4                               |
| <i>SPATA13</i>  | spermatogenesis associated 13                                  |
| <i>PAF1</i>     | PAF1 homolog, Paf1/RNA polymerase II complex component         |
| <i>RUFY4</i>    | RUN and FYVE domain containing 4                               |
| <i>MPZ</i>      | myelin protein zero                                            |
| <i>MYH9</i>     | myosin heavy chain 9                                           |
| <i>NFATC4</i>   | nuclear factor of activated T-cells 4                          |
| <i>SULT1A3</i>  | sulfotransferase family 1A member 3                            |
| <i>PPP1R14A</i> | protein phosphatase 1 regulatory inhibitor subunit 14A         |
| <i>KCNS3</i>    | potassium voltage-gated channel modifier subfamily S member 3  |
| <i>PGLS</i>     | 6-phosphogluconolactonase                                      |

|                      |                                                                         |
|----------------------|-------------------------------------------------------------------------|
| <i>CHRNA3</i>        | cholinergic receptor nicotinic alpha 3 subunit                          |
| <i>RND3</i>          | Rho family GTPase 3                                                     |
| <i>EXOSC3</i>        | exosome component 3                                                     |
| <i>SLC23A1</i>       | solute carrier family 23 member 1                                       |
| <i>TNFRSF10B</i>     | TNF receptor superfamily member 10b                                     |
| <i>ABCB11</i>        | ATP binding cassette subfamily B member 11                              |
| <i>PTN</i>           | pleiotrophin                                                            |
| <i>TEX21P</i>        | testis expressed 21, pseudogene                                         |
| <i>HACE1</i>         | HECT domain and ankyrin repeat containing E3 ubiquitin protein ligase 1 |
| <i>CYGB</i>          | cytoglobin                                                              |
| <i>SLC5A8</i>        | solute carrier family 5 member 8                                        |
| <i>EBF4</i>          | early B-cell factor 4                                                   |
| <i>RP11-144A16.8</i> |                                                                         |
| <i>CSF3R</i>         | colony stimulating factor 3 receptor                                    |
| <i>GSTM3</i>         | glutathione S-transferase mu 3                                          |
| <i>EPHA3</i>         | EPH receptor A3                                                         |
| <i>FAM21C</i>        | family with sequence similarity 21 member C                             |
| <i>CYP11A1</i>       | cytochrome P450 family 11 subfamily A member 1                          |
| <i>ALDH1A1</i>       | aldehyde dehydrogenase 1 family member A1                               |
| <i>AURKA</i>         | aurora kinase A                                                         |
| <i>NOC3L</i>         | NOC3 like DNA replication regulator                                     |
| <i>UQCRC2</i>        | ubiquinol-cytochrome c reductase core protein II                        |
| <i>G6PC3</i>         | glucose-6-phosphatase catalytic subunit 3                               |
| <i>S100A16</i>       | S100 calcium binding protein A16                                        |

|                 |                                                |
|-----------------|------------------------------------------------|
| <i>NEGR1</i>    | neuronal growth regulator 1                    |
| <i>PRF1</i>     | perforin 1                                     |
| <i>NRG1</i>     | neuregulin 1                                   |
| <i>FAR2</i>     | fatty acyl-CoA reductase 2                     |
| <i>HSPA12B</i>  | heat shock protein family A (Hsp70) member 12B |
| <i>FAIM2</i>    | Fas apoptotic inhibitory molecule 2            |
| <i>SLC30A3</i>  | solute carrier family 30 member 3              |
| <i>PLCB1</i>    | phospholipase C beta 1                         |
| <i>HNF1B</i>    | HNF1 homeobox B                                |
| <i>PHGDH</i>    | phosphoglycerate dehydrogenase                 |
| <i>PSMB3</i>    | proteasome subunit beta 3                      |
| <i>TRAF6</i>    | TNF receptor associated factor 6               |
| <i>SLC25A16</i> | solute carrier family 25 member 16             |
| <i>ERO1B</i>    | endoplasmic reticulum oxidoreductase 1 beta    |
| <i>NR1D2</i>    | nuclear receptor subfamily 1 group D member 2  |
| <i>ABCC1</i>    | ATP binding cassette subfamily C member 1      |
| <i>IL10RA</i>   | interleukin 10 receptor subunit alpha          |
| <i>PRPH2</i>    | peripherin 2                                   |
| <i>CYP3A7</i>   | cytochrome P450 family 3 subfamily A member 7  |
| <i>NBR1</i>     | NBR1, autophagy cargo receptor                 |
| <i>HVCN1</i>    | hydrogen voltage gated channel 1               |
| <i>F13A1</i>    | coagulation factor XIII A chain                |
| <i>SAFB</i>     | scaffold attachment factor B                   |
| <i>CNPY3</i>    | canopy FGF signaling regulator 3               |
| <i>TOR1A</i>    | torsin family 1 member A                       |

|                  |                                                                        |
|------------------|------------------------------------------------------------------------|
| <i>USF1</i>      | upstream transcription factor 1                                        |
| <i>ARL2</i>      | ADP ribosylation factor like GTPase 2                                  |
| <i>MEPE</i>      | matrix extracellular phosphoglycoprotein                               |
| <i>SLC30A5</i>   | solute carrier family 30 member 5                                      |
| <i>YBX1</i>      | Y-box binding protein 1                                                |
| <i>PPP1R14B</i>  | protein phosphatase 1 regulatory inhibitor subunit 14B                 |
| <i>ELAVL4</i>    | ELAV like neuron-specific RNA binding protein 4                        |
| <i>TRIM37</i>    | tripartite motif containing 37                                         |
| <i>KIDINS220</i> | kinase D-interacting substrate 220kDa                                  |
| <i>TMEFF2</i>    | transmembrane protein with EGF like and two follistatin like domains 2 |
| <i>CDIPT</i>     | CDP-diacylglycerol--inositol 3-phosphatidyltransferase                 |
| <i>SLC39A1</i>   | solute carrier family 39 member 1                                      |
| <i>TMEM132C</i>  | transmembrane protein 132C                                             |
| <i>SPRED2</i>    | sprouty related EVH1 domain containing 2                               |
| <i>DEFB103A</i>  | defensin beta 103A                                                     |
| <i>NTM</i>       | neurotrimin                                                            |
| <i>DDX1</i>      | DEAD/H-box helicase 1                                                  |
| <i>NR1I3</i>     | nuclear receptor subfamily 1 group I member 3                          |
| <i>VIMP</i>      | VCP interacting membrane selenoprotein                                 |
| <i>OXA1L</i>     | OXA1L, mitochondrial inner membrane protein                            |
| <i>FGF3</i>      | fibroblast growth factor 3                                             |
| <i>DSP</i>       | desmoplakin                                                            |
| <i>LILRB2</i>    | leukocyte immunoglobulin like receptor B2                              |
| <i>ITGA7</i>     | integrin subunit alpha 7                                               |
| <i>TAS2R10</i>   | taste 2 receptor member 10                                             |

|                      |                                                             |
|----------------------|-------------------------------------------------------------|
| <i>S100A7</i>        | S100 calcium binding protein A7                             |
| <i>PBRM1</i>         | polybromo 1                                                 |
| <i>MRS2</i>          | MRS2, magnesium transporter                                 |
| <i>MTUS1</i>         | microtubule associated tumor suppressor 1                   |
| <i>PRKDC</i>         | protein kinase, DNA-activated, catalytic polypeptide        |
| <i>ANXA13</i>        | annexin A13                                                 |
| <i>ERAS</i>          | ES cell expressed Ras                                       |
| <i>IRS2</i>          | insulin receptor substrate 2                                |
| <i>RP1-8B1.4</i>     |                                                             |
| <i>NKAPL</i>         | NFKB activating protein like                                |
| <i>FMO6P</i>         | flavin containing monooxygenase 6 pseudogene                |
| <i>SRP14-AS1</i>     | SRP14 antisense RNA1 (head to head)                         |
| <i>ZEB1-AS1</i>      | ZEB1 antisense RNA 1                                        |
| <i>RP11-259N19.1</i> |                                                             |
| <i>SCARF2</i>        | scavenger receptor class F member 2                         |
| <i>GPAT2</i>         | glycerol-3-phosphate acyltransferase 2, mitochondrial       |
| <i>RP13-314C10.5</i> |                                                             |
| <i>AADACP1</i>       | arylacetamide deacetylase pseudogene 1                      |
| <i>ACAN</i>          | aggrecan                                                    |
| <i>FFAR4</i>         | free fatty acid receptor 4                                  |
| <i>CA14</i>          | carbonic anhydrase 14                                       |
| <i>GFRA4</i>         | GDNF family receptor alpha 4                                |
| <i>ALG1</i>          | ALG1, chitobiosyldiphosphodolichol beta-mannosyltransferase |

|                 |                                                                               |
|-----------------|-------------------------------------------------------------------------------|
| <i>ADAMTS15</i> | ADAM metallopeptidase with thrombospondin type 1 motif 15                     |
| <i>E2F1</i>     | E2F transcription factor 1                                                    |
| <i>BACE2</i>    | beta-site APP-cleaving enzyme 2                                               |
| <i>ADAD1</i>    | adenosine deaminase domain containing 1                                       |
| <i>OSMR</i>     | oncostatin M receptor                                                         |
| <i>ADCY2</i>    | adenylate cyclase 2                                                           |
| <i>DOCK1</i>    | dedicator of cytokinesis 1                                                    |
| <i>CXCR6</i>    | C-X-C motif chemokine receptor 6                                              |
| <i>PIAS1</i>    | protein inhibitor of activated STAT 1                                         |
| <i>ALCAM</i>    | activated leukocyte cell adhesion molecule                                    |
| <i>CDSN</i>     | corneodesmosin                                                                |
| <i>CHFR</i>     | checkpoint with forkhead and ring finger domains, E3 ubiquitin protein ligase |
| <i>TPR</i>      | translocated promoter region, nuclear basket protein                          |
| <i>VCP</i>      | valosin containing protein                                                    |
| <i>JPH1</i>     | junctionophilin 1                                                             |
| <i>FAM181A</i>  | family with sequence similarity 181 member A                                  |
| <i>CEP68</i>    | centrosomal protein 68                                                        |
| <i>OGDH</i>     | oxoglutarate dehydrogenase                                                    |
| <i>ADAM9</i>    | ADAM metallopeptidase domain 9                                                |
| <i>SMAD1</i>    | SMAD family member 1                                                          |
| <i>RETNLB</i>   | resistin like beta                                                            |
| <i>NFKB1</i>    | nuclear factor kappa B subunit 1                                              |
| <i>MAN1C1</i>   | mannosidase alpha class 1C member 1                                           |
| <i>EZR</i>      | ezrin                                                                         |
| <i>PRKD1</i>    | protein kinase D1                                                             |

|                 |                                                         |
|-----------------|---------------------------------------------------------|
| <i>NAV1</i>     | neuron navigator 1                                      |
| <i>SERPINA6</i> | serpin family A member 6                                |
| <i>ACR</i>      | acrosin                                                 |
| <i>TXN2</i>     | thioredoxin 2                                           |
| <i>FCGR2C</i>   | Fc fragment of IgG receptor IIc (gene/pseudogene)       |
| <i>PIWIL1</i>   | piwi like RNA-mediated gene silencing 1                 |
| <i>STOM</i>     | stomatin                                                |
| <i>SHF</i>      | Src homology 2 domain containing F                      |
| <i>PTGES2</i>   | prostaglandin E synthase 2                              |
| <i>MUC6</i>     | mucin 6, oligomeric mucus/gel-forming                   |
| <i>PRPF19</i>   | pre-mRNA processing factor 19                           |
| <i>MC4R</i>     | melanocortin 4 receptor                                 |
| <i>PIM2</i>     | Pim-2 proto-oncogene, serine/threonine kinase           |
| <i>TNFSF13</i>  | tumor necrosis factor superfamily member 13             |
| <i>FOXA1</i>    | forkhead box A1                                         |
| <i>PGM1</i>     | phosphoglucomutase 1                                    |
| <i>PIAS3</i>    | protein inhibitor of activated STAT 3                   |
| <i>KCNK15</i>   | potassium two pore domain channel subfamily K member 15 |
| <i>RPL13A</i>   | ribosomal protein L13a                                  |
| <i>SH2B1</i>    | SH2B adaptor protein 1                                  |
| <i>RRS1</i>     | ribosome biogenesis regulator homolog                   |
| <i>DAD1</i>     | defender against cell death 1                           |
| <i>TG</i>       | thyroglobulin                                           |
| <i>NR1I2</i>    | nuclear receptor subfamily 1 group I member 2           |
| <i>JPH2</i>     | junctionophilin 2                                       |

|                 |                                                       |
|-----------------|-------------------------------------------------------|
| <i>SSFA2</i>    | sperm specific antigen 2                              |
| <i>TTR</i>      | transthyretin                                         |
| <i>RPL32</i>    | ribosomal protein L32                                 |
| <i>FANK1</i>    | fibronectin type III and ankyrin repeat domains 1     |
| <i>P2RY14</i>   | purinergic receptor P2Y14                             |
| <i>SLC9A3R1</i> | SLC9A3 regulator 1                                    |
| <i>ESD</i>      | esterase D                                            |
| <i>UBQLN4</i>   | ubiquilin 4                                           |
| <i>CHAF1A</i>   | chromatin assembly factor 1 subunit A                 |
| <i>PELP1</i>    | proline, glutamate and leucine rich protein 1         |
| <i>SLC6A15</i>  | solute carrier family 6 member 15                     |
| <i>SLC2A1</i>   | solute carrier family 2 member 1                      |
| <i>SOAT2</i>    | sterol O-acyltransferase 2                            |
| <i>TES</i>      | testin LIM domain protein                             |
| <i>AHNAK</i>    | AHNAK nucleoprotein                                   |
| <i>LIPE</i>     | lipase E, hormone sensitive type                      |
| <i>AGTR2</i>    | angiotensin II receptor type 2                        |
| <i>BMPRI1A</i>  | bone morphogenetic protein receptor type 1A           |
| <i>GCKR</i>     | glucokinase regulator                                 |
| <i>NPL</i>      | N-acetylneuraminase pyruvate lyase                    |
| <i>FOXP1</i>    | forkhead box P1                                       |
| <i>HPCAL1</i>   | hippocalcin like 1                                    |
| <i>HLA-DRB5</i> | major histocompatibility complex, class II, DR beta 5 |
| <i>CRX</i>      | cone-rod homeobox                                     |
| <i>BRCA1</i>    | BRCA1, DNA repair associated                          |

|                 |                                                         |
|-----------------|---------------------------------------------------------|
| <i>FIP1L1</i>   | factor interacting with PAPOLA and CPSF1                |
| <i>AWAT2</i>    | acyl-CoA wax alcohol acyltransferase 2                  |
| <i>GGCT</i>     | gamma-glutamylcyclotransferase                          |
| <i>FADS1</i>    | fatty acid desaturase 1                                 |
| <i>CHST8</i>    | carbohydrate sulfotransferase 8                         |
| <i>BNIP3</i>    | BCL2 interacting protein 3                              |
| <i>CARM1</i>    | coactivator associated arginine methyltransferase 1     |
| <i>RHOF</i>     | ras homolog family member F, filopodia associated       |
| <i>RBP7</i>     | retinol binding protein 7                               |
| <i>PSORS1C1</i> | psoriasis susceptibility 1 candidate 1                  |
| <i>BMP4</i>     | bone morphogenetic protein 4                            |
| <i>IL24</i>     | interleukin 24                                          |
| <i>SCP2</i>     | sterol carrier protein 2                                |
| <i>NCR1</i>     | natural cytotoxicity triggering receptor 1              |
| <i>EFHC1</i>    | EF-hand domain containing 1                             |
| <i>ITLN1</i>    | intelectin 1                                            |
| <i>PEF1</i>     | penta-EF-hand domain containing 1                       |
| <i>ITGA5</i>    | integrin subunit alpha 5                                |
| <i>KLK11</i>    | kallikrein related peptidase 11                         |
| <i>OR52J3</i>   | olfactory receptor family 52 subfamily J member 3       |
| <i>NANOS3</i>   | nanos C2HC-type zinc finger 3                           |
| <i>TMTC2</i>    | transmembrane and tetratricopeptide repeat containing 2 |
| <i>VAV1</i>     | vav guanine nucleotide exchange factor 1                |
| <i>S100P</i>    | S100 calcium binding protein P                          |
| <i>EPB41</i>    | erythrocyte membrane protein band 4.1                   |

|                  |                                                          |
|------------------|----------------------------------------------------------|
| <i>PTCH1</i>     | patched 1                                                |
| <i>TNFRSF12A</i> | TNF receptor superfamily member 12A                      |
| <i>MRAP</i>      | melanocortin 2 receptor accessory protein                |
| <i>TUSC3</i>     | tumor suppressor candidate 3                             |
| <i>PGR</i>       | progesterone receptor                                    |
| <i>GRM1</i>      | glutamate metabotropic receptor 1                        |
| <i>DGKG</i>      | diacylglycerol kinase gamma                              |
| <i>PTK7</i>      | protein tyrosine kinase 7 (inactive)                     |
| <i>DNAH11</i>    | dynein axonemal heavy chain 11                           |
| <i>KLC1</i>      | kinesin light chain 1                                    |
| <i>TNFRSF10D</i> | TNF receptor superfamily member 10d                      |
| <i>SERPINA7</i>  | serpin family A member 7                                 |
| <i>RPSA</i>      | ribosomal protein SA                                     |
| <i>CSF2RB</i>    | colony stimulating factor 2 receptor beta common subunit |
| <i>ADGRG3</i>    | adhesion G protein-coupled receptor G3                   |
| <i>FCGR3B</i>    | Fc fragment of IgG receptor IIIb                         |
| <i>PPP3CB</i>    | protein phosphatase 3 catalytic subunit beta             |
| <i>PPIB</i>      | peptidylprolyl isomerase B                               |
| <i>NOX3</i>      | NADPH oxidase 3                                          |
| <i>NOTCH3</i>    | notch 3                                                  |
| <i>SLC25A18</i>  | solute carrier family 25 member 18                       |
| <i>LRBA</i>      | LPS responsive beige-like anchor protein                 |
| <i>C4BPA</i>     | complement component 4 binding protein alpha             |
| <i>BACE1</i>     | beta-secretase 1                                         |
| <i>TMEM18</i>    | transmembrane protein 18                                 |

|                |                                                |
|----------------|------------------------------------------------|
| <i>MBP</i>     | myelin basic protein                           |
| <i>SOX5</i>    | SRY-box 5                                      |
| <i>CASP4</i>   | caspase 4                                      |
| <i>AQP9</i>    | aquaporin 9                                    |
| <i>F11</i>     | coagulation factor XI                          |
| <i>CDCA7L</i>  | cell division cycle associated 7 like          |
| <i>CCHCR1</i>  | coiled-coil alpha-helical rod protein 1        |
| <i>FUT2</i>    | fucosyltransferase 2                           |
| <i>CBFB</i>    | core-binding factor beta subunit               |
| <i>CBLB</i>    | Cbl proto-oncogene B                           |
| <i>DGAT2L6</i> | diacylglycerol O-acyltransferase 2 like 6      |
| <i>IREB2</i>   | iron responsive element binding protein 2      |
| <i>FMR1</i>    | fragile X mental retardation 1                 |
| <i>OPN1LW</i>  | opsin 1 (cone pigments), long-wave-sensitive   |
| <i>PSPH</i>    | phosphoserine phosphatase                      |
| <i>STIM2</i>   | stromal interaction molecule 2                 |
| <i>PRDX3</i>   | peroxiredoxin 3                                |
| <i>TCERG1L</i> | transcription elongation regulator 1 like      |
| <i>FOXB1</i>   | forkhead box B1                                |
| <i>UBE2K</i>   | ubiquitin conjugating enzyme E2 K              |
| <i>CCAR1</i>   | cell division cycle and apoptosis regulator 1  |
| <i>ANKEF1</i>  | ankyrin repeat and EF-hand domain containing 1 |
| <i>GAS6</i>    | growth arrest specific 6                       |
| <i>EPHA1</i>   | EPH receptor A1                                |
| <i>ARIH2</i>   | ariadne RBR E3 ubiquitin protein ligase 2      |

|                |                                                 |
|----------------|-------------------------------------------------|
| <i>ARSB</i>    | arylsulfatase B                                 |
| <i>DUSP4</i>   | dual specificity phosphatase 4                  |
| <i>DNASE1</i>  | deoxyribonuclease 1                             |
| <i>DFFB</i>    | DNA fragmentation factor subunit beta           |
| <i>HPD</i>     | 4-hydroxyphenylpyruvate dioxygenase             |
| <i>CDK4</i>    | cyclin dependent kinase 4                       |
| <i>MAPK10</i>  | mitogen-activated protein kinase 10             |
| <i>PON2</i>    | paraoxonase 2                                   |
| <i>NCAM1</i>   | neural cell adhesion molecule 1                 |
| <i>PLA2G15</i> | phospholipase A2 group XV                       |
| <i>PPL</i>     | periplakin                                      |
| <i>TGM5</i>    | transglutaminase 5                              |
| <i>NCR3</i>    | natural cytotoxicity triggering receptor 3      |
| <i>HDAC6</i>   | histone deacetylase 6                           |
| <i>C9orf3</i>  | chromosome 9 open reading frame 3               |
| <i>OXR1</i>    | oxidation resistance 1                          |
| <i>CACNA1E</i> | calcium voltage-gated channel subunit alpha1 E  |
| <i>CDC42</i>   | cell division cycle 42                          |
| <i>LOXL2</i>   | lysyl oxidase like 2                            |
| <i>DNAH5</i>   | dynein axonemal heavy chain 5                   |
| <i>ATXN7</i>   | ataxin 7                                        |
| <i>HAMP</i>    | hepcidin antimicrobial peptide                  |
| <i>EBF3</i>    | early B-cell factor 3                           |
| <i>TUFM</i>    | Tu translation elongation factor, mitochondrial |
| <i>RARG</i>    | retinoic acid receptor gamma                    |

|                |                                                                                |
|----------------|--------------------------------------------------------------------------------|
| <i>OGG1</i>    | 8-oxoguanine DNA glycosylase                                                   |
| <i>ODC1</i>    | ornithine decarboxylase 1                                                      |
| <i>PRDX1</i>   | peroxiredoxin 1                                                                |
| <i>COL6A5</i>  | collagen type VI alpha 5 chain                                                 |
| <i>UGT1A6</i>  | UDP glucuronosyltransferase family 1 member A6                                 |
| <i>P2RX5</i>   | purinergic receptor P2X 5                                                      |
| <i>P2RX4</i>   | purinergic receptor P2X 4                                                      |
| <i>PRMT3</i>   | protein arginine methyltransferase 3                                           |
| <i>PIP5K1B</i> | phosphatidylinositol-4-phosphate 5-kinase type 1 beta                          |
| <i>YWHAB</i>   | tyrosine 3-monooxygenase/tryptophan 5-monooxygenase activation protein<br>beta |
| <i>HTN1</i>    | histatin 1                                                                     |
| <i>KALRN</i>   | kalirin, RhoGEF kinase                                                         |
| <i>TIRAP</i>   | TIR domain containing adaptor protein                                          |
| <i>SNX9</i>    | sorting nexin 9                                                                |
| <i>TRIM63</i>  | tripartite motif containing 63                                                 |
| <i>MFGE8</i>   | milk fat globule-EGF factor 8 protein                                          |
| <i>PRRC2A</i>  | proline rich coiled-coil 2A                                                    |
| <i>XCR1</i>    | X-C motif chemokine receptor 1                                                 |
| <i>NVL</i>     | nuclear VCP-like                                                               |
| <i>TPSAB1</i>  | tryptase alpha/beta 1                                                          |
| <i>PRLR</i>    | prolactin receptor                                                             |
| <i>PLA2G6</i>  | phospholipase A2 group VI                                                      |
| <i>TTC6</i>    | tetratricopeptide repeat domain 6                                              |
| <i>RXRA</i>    | retinoid X receptor alpha                                                      |

|                      |                                                                                   |
|----------------------|-----------------------------------------------------------------------------------|
| <i>RP11-638I2.10</i> |                                                                                   |
| <i>CTD-2562J17.6</i> |                                                                                   |
| <i>S100A11</i>       | S100 calcium binding protein A11                                                  |
| <i>IGHEP2</i>        | immunoglobulin heavy constant epsilon P2 (pseudogene)                             |
| <i>RP11-480I12.5</i> |                                                                                   |
| <i>CTC-479C5.12</i>  |                                                                                   |
| <i>SCHLAP1</i>       | SWI/SNF complex antagonist associated with prostate cancer 1 (non-protein coding) |
| <i>ANOS1</i>         | anosmin 1                                                                         |
| <i>RGS1</i>          | regulator of G-protein signaling 1                                                |
| <i>MIR429</i>        | microRNA 429                                                                      |
| <i>TTL7</i>          | tubulin tyrosine ligase like 7                                                    |
| <i>IL27</i>          | interleukin 27                                                                    |
| <i>TCN2</i>          | transcobalamin 2                                                                  |
| <i>PIGR</i>          | polymeric immunoglobulin receptor                                                 |
| <i>ITGAL</i>         | integrin subunit alpha L                                                          |
| <i>RPE</i>           | ribulose-5-phosphate-3-epimerase                                                  |
| <i>MYH11</i>         | myosin heavy chain 11                                                             |
| <i>PRPS1</i>         | phosphoribosyl pyrophosphate synthetase 1                                         |
| <i>AFF4</i>          | AF4/FMR2 family member 4                                                          |
| <i>AP001347.6</i>    |                                                                                   |

|                     |                                                          |
|---------------------|----------------------------------------------------------|
| <i>LRP2BP</i>       | LRP2 binding protein                                     |
| <i>BTG4</i>         | BTG anti-proliferation factor 4                          |
| <i>TLDC2</i>        | TBC/LysM-associated domain containing 2                  |
| <i>INHBB</i>        | inhibin beta B subunit                                   |
| <i>MAGI2-AS3</i>    | MAGI2 antisense RNA 3                                    |
| <i>DLG2</i>         | discs large MAGUK scaffold protein 2                     |
| <i>RP11-12A20.7</i> |                                                          |
| <i>RP4-669K10.8</i> |                                                          |
| <i>ARMCX1</i>       | armadillo repeat containing, X-linked 1                  |
| <i>POLR1E</i>       | RNA polymerase I subunit E                               |
| <i>KIAA1456</i>     | KIAA1456                                                 |
| <i>AKAP7</i>        | A-kinase anchoring protein 7                             |
| <i>FAM86B3P</i>     | family with sequence similarity 86 member B3, pseudogene |
| <i>C1orf147</i>     | chromosome 1 open reading frame 147                      |
| <i>APBB1</i>        | amyloid beta precursor protein binding family B member 1 |
| <i>RP11-54A4.2</i>  |                                                          |
| <i>CASP1P2</i>      | caspase 1 pseudogene 2                                   |
| <i>ARHGEF26-AS1</i> | ARHGEF26 antisense RNA 1                                 |
| <i>CAPN9</i>        | calpain 9                                                |
| <i>NINJ2</i>        | ninjurin 2                                               |
| <i>ZDHHC14</i>      | zinc finger DHHC-type containing 14                      |
| <i>C19orf38</i>     | chromosome 19 open reading frame 38                      |

|                       |                                                       |
|-----------------------|-------------------------------------------------------|
| <i>ZNF331</i>         | zinc finger protein 331                               |
| <i>ZFPM2</i>          | zinc finger protein, FOG family member 2              |
| <i>CTD-2619J13.16</i> |                                                       |
| <i>TMEM170B</i>       | transmembrane protein 170B                            |
| <i>GPR12</i>          | G protein-coupled receptor 12                         |
| <i>PANK1</i>          | pantothenate kinase 1                                 |
| <i>UGT8</i>           | UDP glycosyltransferase 8                             |
| <i>KCNJ16</i>         | potassium voltage-gated channel subfamily J member 16 |
| <i>CHIC1</i>          | cysteine rich hydrophobic domain 1                    |
| <i>MT-TL1</i>         | mitochondrially encoded tRNA leucine 1 (UUA/G)        |
| <i>CCNB2</i>          | cyclin B2                                             |
| <i>CST9</i>           | cystatin 9                                            |
| <i>RP11-10H3.1</i>    |                                                       |
| <i>SMO</i>            | smoothened, frizzled class receptor                   |
| <i>MYEF2</i>          | myelin expression factor 2                            |
| <i>CTD-2240E14.4</i>  |                                                       |
| <i>CEP19</i>          | centrosomal protein 19                                |
| <i>LHFP</i>           | lipoma HMGIC fusion partner                           |
| <i>PBX3</i>           | PBX homeobox 3                                        |
| <i>SRM</i>            | spermidine synthase                                   |
| <i>ACKR1</i>          | atypical chemokine receptor 1 (Duffy blood group)     |
| <i>RGS14</i>          | regulator of G-protein signaling 14                   |
| <i>TMEM178A</i>       | transmembrane protein 178A                            |

|                           |                                                                       |
|---------------------------|-----------------------------------------------------------------------|
| <i>SRL</i>                | sarcalumenin                                                          |
| <i>STH</i>                | saitohin                                                              |
| <i>PROM1</i>              | prominin 1                                                            |
| <i>SLC24A2</i>            | solute carrier family 24 member 2                                     |
| <i>DCK</i>                | deoxycytidine kinase                                                  |
| <i>AK1</i>                | adenylate kinase 1                                                    |
| <i>CTTNBP2</i>            | cortactin binding protein 2                                           |
| <i>XIST</i>               | X inactive specific transcript (non-protein coding)                   |
| <i>CTD-<br/>2368P22.1</i> |                                                                       |
| <i>RP11-<br/>135F9.3</i>  |                                                                       |
| <i>ACBD7</i>              | acyl-CoA binding domain containing 7                                  |
| <i>AKR1B10</i>            | aldo-keto reductase family 1 member B10                               |
| <i>PSMB8-AS1</i>          | PSMB8 antisense RNA 1 (head to head)                                  |
| <i>KCNAB2</i>             | potassium voltage-gated channel subfamily A regulatory beta subunit 2 |
| <i>CORO2B</i>             | coronin 2B                                                            |
| <i>BANP</i>               | BTG3 associated nuclear protein                                       |
| <i>LCT</i>                | lactase                                                               |
| <i>ADH6</i>               | alcohol dehydrogenase 6 (class V)                                     |
| <i>HLA-H</i>              | major histocompatibility complex, class I, H (pseudogene)             |
| <i>DBF4B</i>              | DBF4 zinc finger B                                                    |
| <i>KLF15</i>              | Kruppel like factor 15                                                |
| <i>LDLRAP1</i>            | low density lipoprotein receptor adaptor protein 1                    |
| <i>LAMP1</i>              | lysosomal associated membrane protein 1                               |

|                      |                                                              |
|----------------------|--------------------------------------------------------------|
| <i>PCAT6</i>         | prostate cancer associated transcript 6 (non-protein coding) |
| <i>DUSP19</i>        | dual specificity phosphatase 19                              |
| <i>CH17-340M24.3</i> | uncharacterized protein BC009467                             |
| <i>SH3RF3</i>        | SH3 domain containing ring finger 3                          |
| <i>C2orf73</i>       | chromosome 2 open reading frame 73                           |
| <i>FLNA</i>          | filamin A                                                    |
| <i>AC006014.8</i>    |                                                              |
| <i>MEF2A</i>         | myocyte enhancer factor 2A                                   |
| <i>PPP5C</i>         | protein phosphatase 5 catalytic subunit                      |
| <i>AC138035.2</i>    |                                                              |
| <i>MIR31HG</i>       | MIR31 host gene                                              |
| <i>SEC14L3</i>       | SEC14 like lipid binding 3                                   |
| <i>TM4SF1</i>        | transmembrane 4 L six family member 1                        |
| <i>SMPD2</i>         | sphingomyelin phosphodiesterase 2                            |
| <i>ROBO2</i>         | roundabout guidance receptor 2                               |
| <i>KIAA0391</i>      | KIAA0391                                                     |
| <i>NEU1</i>          | neuraminidase 1                                              |
| <i>ELK3</i>          | ELK3, ETS transcription factor                               |
| <i>KIAA0825</i>      | KIAA0825                                                     |
| <i>FLCN</i>          | folliculin                                                   |
| <i>GSDMD</i>         | gasdermin D                                                  |
| <i>CDC42EP3</i>      | CDC42 effector protein 3                                     |
| <i>FOXO4</i>         | forkhead box O4                                              |
| <i>LCK</i>           | LCK proto-oncogene, Src family tyrosine kinase               |

|                |                                                                        |
|----------------|------------------------------------------------------------------------|
| <i>SOX9</i>    | SRY-box 9                                                              |
| <i>RBPJ</i>    | recombination signal binding protein for immunoglobulin kappa J region |
| <i>UNC93B1</i> | unc-93 homolog B1 ( <i>C. elegans</i> )                                |
| <i>ITPR1</i>   | inositol 1,4,5-trisphosphate receptor type 1                           |
| <i>FMO3</i>    | flavin containing monooxygenase 3                                      |
| <i>TWSG1</i>   | twisted gastrulation BMP signaling modulator 1                         |
| <i>TXNDC16</i> | thioredoxin domain containing 16                                       |
| <i>THBS1</i>   | thrombospondin 1                                                       |
| <i>CHST2</i>   | carbohydrate sulfotransferase 2                                        |
| <i>BMI1</i>    | BMI1 proto-oncogene, polycomb ring finger                              |
| <i>GSDMC</i>   | gasdermin C                                                            |
| <i>SLC7A7</i>  | solute carrier family 7 member 7                                       |
| <i>GYPB</i>    | glycophorin B (MNS blood group)                                        |
| <i>ITGB5</i>   | integrin subunit beta 5                                                |
| <i>UTY</i>     | ubiquitously transcribed tetratricopeptide repeat containing, Y-linked |
| <i>P2RX3</i>   | purinergic receptor P2X 3                                              |
| <i>SPRY2</i>   | sprouty RTK signaling antagonist 2                                     |
| <i>TNKS</i>    | tankyrase                                                              |
| <i>CCDC69</i>  | coiled-coil domain containing 69                                       |
| <i>STAP2</i>   | signal transducing adaptor family member 2                             |
| <i>RBFOX1</i>  | RNA binding protein, fox-1 homolog 1                                   |
| <i>AMY2A</i>   | amylase, alpha 2A (pancreatic)                                         |
| <i>CDC20</i>   | cell division cycle 20                                                 |
| <i>PER1</i>    | period circadian clock 1                                               |
| <i>RIPK1</i>   | receptor interacting serine/threonine kinase 1                         |

|                  |                                                            |
|------------------|------------------------------------------------------------|
| <i>MAP3K7</i>    | mitogen-activated protein kinase kinase kinase 7           |
| <i>TRIM24</i>    | tripartite motif containing 24                             |
| <i>COMT</i>      | catechol-O-methyltransferase                               |
| <i>LIPA</i>      | lipase A, lysosomal acid type                              |
| <i>WNT5A</i>     | Wnt family member 5A                                       |
| <i>S100B</i>     | S100 calcium binding protein B                             |
| <i>VDAC1</i>     | voltage dependent anion channel 1                          |
| <i>TAB2</i>      | TGF-beta activated kinase 1/MAP3K7 binding protein 2       |
| <i>PSMG1</i>     | proteasome assembly chaperone 1                            |
| <i>SLC7A1</i>    | solute carrier family 7 member 1                           |
| <i>ENAH</i>      | enabled homolog (Drosophila)                               |
| <i>ATXN1</i>     | ataxin 1                                                   |
| <i>XBP1</i>      | X-box binding protein 1                                    |
| <i>C6orf15</i>   | chromosome 6 open reading frame 15                         |
| <i>MDH2</i>      | malate dehydrogenase 2                                     |
| <i>TNFRSF13C</i> | TNF receptor superfamily member 13C                        |
| <i>ZAP70</i>     | zeta chain of T cell receptor associated protein kinase 70 |
| <i>MVD</i>       | mevalonate diphosphate decarboxylase                       |
| <i>GPR4</i>      | G protein-coupled receptor 4                               |
| <i>CCL16</i>     | C-C motif chemokine ligand 16                              |
| <i>IL26</i>      | interleukin 26                                             |
| <i>WAC</i>       | WW domain containing adaptor with coiled-coil              |
| <i>NR6A1</i>     | nuclear receptor subfamily 6 group A member 1              |
| <i>NES</i>       | nestin                                                     |
| <i>IFNA13</i>    | interferon alpha 13                                        |

|                |                                                |
|----------------|------------------------------------------------|
| <i>CACNA1B</i> | calcium voltage-gated channel subunit alpha1 B |
| <i>SLC24A1</i> | solute carrier family 24 member 1              |
| <i>P2RY1</i>   | purinergic receptor P2Y1                       |

**SUPPLEMENTAL TABLE 2. (IL5 and GR Pathway Genes): A) IL5 pathway genes**

| <b>Symbol</b> | <b>Gene Name</b>                                      |
|---------------|-------------------------------------------------------|
| <i>AFP</i>    | alpha fetoprotein                                     |
| <i>AKT1</i>   | AKT serine/threonine kinase 1                         |
| <i>BAX</i>    | BCL2 associated X, apoptosis regulator                |
| <i>BGLAP</i>  | bone gamma-carboxyglutamate protein                   |
| <i>CDK5</i>   | cyclin dependent kinase 5                             |
| <i>CDK5R1</i> | cyclin dependent kinase 5 regulatory subunit 1        |
| <i>CDKN1A</i> | cyclin dependent kinase inhibitor 1A                  |
| <i>CGA</i>    | glycoprotein hormones, alpha polypeptide              |
| <i>CREB1</i>  | cAMP responsive element binding protein 1             |
| <i>CREBBP</i> | CREB binding protein                                  |
| <i>CSF2</i>   | colony stimulating factor 2                           |
| <i>CSN2</i>   | casein beta                                           |
| <i>CXCL8</i>  | C-X-C motif chemokine ligand 8                        |
| <i>EGR1</i>   | early growth response 1                               |
| <i>EP300</i>  | E1A binding protein p300                              |
| <i>FGG</i>    | fibrinogen gamma chain                                |
| <i>FKBP4</i>  | FK506 binding protein 4                               |
| <i>FKBP5</i>  | FK506 binding protein 5                               |
| <i>FOS</i>    | Fos proto-oncogene, AP-1 transcription factor subunit |
| <i>GATA3</i>  | GATA binding protein 3                                |
| <i>GSK3B</i>  | glycogen synthase kinase 3 beta                       |
| <i>HDAC1</i>  | histone deacetylase 1                                 |

|                 |                                                       |
|-----------------|-------------------------------------------------------|
| <i>HDAC2</i>    | histone deacetylase 2                                 |
| <i>HSP90AA1</i> | heat shock protein 90 alpha family class A member 1   |
| <i>ICAM1</i>    | intercellular adhesion molecule 1                     |
| <i>IFNG</i>     | interferon gamma                                      |
| <i>IL13</i>     | interleukin 13                                        |
| <i>IL2</i>      | interleukin 2                                         |
| <i>IL4</i>      | interleukin 4                                         |
| <i>IL5</i>      | interleukin 5                                         |
| <i>IL6</i>      | interleukin 6                                         |
| <i>IRF1</i>     | interferon regulatory factor 1                        |
| <i>JUN</i>      | Jun proto-oncogene, AP-1 transcription factor subunit |
| <i>KMT5B</i>    | lysine methyltransferase 5B                           |
| <i>KRT14</i>    | keratin 14                                            |
| <i>KRT17</i>    | keratin 17                                            |
| <i>KRT5</i>     | keratin 5                                             |
| <i>MAPK1</i>    | mitogen-activated protein kinase 1                    |
| <i>MAPK10</i>   | mitogen-activated protein kinase 10                   |
| <i>MAPK11</i>   | mitogen-activated protein kinase 11                   |
| <i>MAPK14</i>   | mitogen-activated protein kinase 14                   |
| <i>MAPK3</i>    | mitogen-activated protein kinase 3                    |
| <i>MAPK8</i>    | mitogen-activated protein kinase 8                    |
| <i>MAPK9</i>    | mitogen-activated protein kinase 9                    |
| <i>MDM2</i>     | MDM2 proto-oncogene                                   |
| <i>MMP1</i>     | matrix metalloproteinase 1                            |
| <i>NCOA1</i>    | nuclear receptor coactivator 1                        |

|                |                                                                                                   |
|----------------|---------------------------------------------------------------------------------------------------|
| <i>NCOA2</i>   | nuclear receptor coactivator 2                                                                    |
| <i>NFATC1</i>  | nuclear factor of activated T-cells 1                                                             |
| <i>NFKB1</i>   | nuclear factor kappa B subunit 1                                                                  |
| <i>NR1I3</i>   | nuclear receptor subfamily 1 group I member 3                                                     |
| <i>NR3C1</i>   | nuclear receptor subfamily 3 group C member 1                                                     |
| <i>NR4A1</i>   | nuclear receptor subfamily 4 group A member 1                                                     |
| <i>PBX1</i>    | PBX homeobox 1                                                                                    |
| <i>PCK2</i>    | phosphoenolpyruvate carboxykinase 2, mitochondrial                                                |
| <i>POMC</i>    | proopiomelanocortin                                                                               |
| <i>POU1F1</i>  | POU class 1 homeobox 1                                                                            |
| <i>POU2F1</i>  | POU class 2 homeobox 1                                                                            |
| <i>PPP5C</i>   | protein phosphatase 5 catalytic subunit                                                           |
| <i>PRKACA</i>  | protein kinase cAMP-activated catalytic subunit alpha                                             |
| <i>PRKACB</i>  | protein kinase cAMP-activated catalytic subunit beta                                              |
| <i>PRKACG</i>  | protein kinase cAMP-activated catalytic subunit gamma                                             |
| <i>PRL</i>     | prolactin                                                                                         |
| <i>RELA</i>    | RELA proto-oncogene, NF-kB subunit                                                                |
| <i>SELE</i>    | selectin E                                                                                        |
| <i>SFN</i>     | stratifin                                                                                         |
| <i>SGK1</i>    | serum/glucocorticoid regulated kinase 1                                                           |
| <i>SMARCA4</i> | SWI/SNF related, matrix associated, actin dependent regulator of chromatin, subfamily a, member 4 |
| <i>SMARCC1</i> | SWI/SNF related, matrix associated, actin dependent regulator of chromatin subfamily c member 1   |

|                |                                                                                                   |
|----------------|---------------------------------------------------------------------------------------------------|
| <i>SMARCC2</i> | SWI/SNF related, matrix associated, actin dependent regulator of chromatin subfamily c member 2   |
| <i>SMARCD1</i> | SWI/SNF related, matrix associated, actin dependent regulator of chromatin, subfamily d, member 1 |
| <i>SPI1</i>    | Spi-1 proto-oncogene                                                                              |
| <i>STAT1</i>   | signal transducer and activator of transcription 1                                                |
| <i>STAT5A</i>  | signal transducer and activator of transcription 5A                                               |
| <i>STAT5B</i>  | signal transducer and activator of transcription 5B                                               |
| <i>SUMO2</i>   | small ubiquitin-like modifier 2                                                                   |
| <i>TBP</i>     | TATA-box binding protein                                                                          |
| <i>TBX21</i>   | T-box 21                                                                                          |
| <i>TP53</i>    | tumor protein p53                                                                                 |
| <i>TSG101</i>  | tumor susceptibility 101                                                                          |
| <i>VIPR1</i>   | vasoactive intestinal peptide receptor 1                                                          |
| <i>YWHAH</i>   | tyrosine 3-monooxygenase/tryptophan 5-monooxygenase activation protein eta                        |

**SUPPLEMENTAL TABLE 2. (IL5 and GR Pathway Genes): B) GR pathway genes**

| <b>Symbol</b> | <b>Gene Name</b>                                         |
|---------------|----------------------------------------------------------|
| CSF2RB        | colony stimulating factor 2 receptor beta common subunit |
| SPRED1        | sprouty related EVH1 domain containing 1                 |
| ELK1          | ELK1, ETS transcription factor                           |
| AKT1          | AKT serine/threonine kinase 1                            |
| FOXO3         | forkhead box O3                                          |

|         |                                                                        |
|---------|------------------------------------------------------------------------|
| FOS     | Fos proto-oncogene, AP-1 transcription factor subunit                  |
| GRB2    | growth factor receptor bound protein 2                                 |
| GSK3A   | glycogen synthase kinase 3 alpha                                       |
| GSK3B   | glycogen synthase kinase 3 beta                                        |
| IL2     | interleukin 2                                                          |
| IL5RA   | interleukin 5 receptor subunit alpha                                   |
| JAK1    | Janus kinase 1                                                         |
| JAK2    | Janus kinase 2                                                         |
| JUN     | Jun proto-oncogene, AP-1 transcription factor subunit                  |
| KRAS    | KRAS proto-oncogene, GTPase                                            |
| LYN     | LYN proto-oncogene, Src family tyrosine kinase                         |
| MAPT    | microtubule associated protein tau                                     |
| MYC     | MYC proto-oncogene, bHLH transcription factor                          |
| PIK3CG  | phosphatidylinositol-4,5-bisphosphate 3-kinase catalytic subunit gamma |
| PIK3R1  | phosphoinositide-3-kinase regulatory subunit 1                         |
| PIK3R2  | phosphoinositide-3-kinase regulatory subunit 2                         |
| MAPK1   | mitogen-activated protein kinase 1                                     |
| MAPK3   | mitogen-activated protein kinase 3                                     |
| MAP2K1  | mitogen-activated protein kinase kinase 1                              |
| MAP2K2  | mitogen-activated protein kinase kinase 2                              |
| PTPN11  | protein tyrosine phosphatase, non-receptor type 11                     |
| RAF1    | Raf-1 proto-oncogene, serine/threonine kinase                          |
| BCL2    | BCL2, apoptosis regulator                                              |
| RPS6    | ribosomal protein S6                                                   |
| RPS6KA1 | ribosomal protein S6 kinase A1                                         |

|         |                                                     |
|---------|-----------------------------------------------------|
| RPS6KB1 | ribosomal protein S6 kinase B1                      |
| RPS6KB2 | ribosomal protein S6 kinase B2                      |
| SHC1    | SHC adaptor protein 1                               |
| SOS1    | SOS Ras/Rac guanine nucleotide exchange factor 1    |
| STAT1   | signal transducer and activator of transcription 1  |
| STAT3   | signal transducer and activator of transcription 3  |
| STAT5A  | signal transducer and activator of transcription 5A |
| STAT5B  | signal transducer and activator of transcription 5B |
| SYK     | spleen associated tyrosine kinase                   |
| BTK     | Bruton tyrosine kinase                              |

**SUPPLEMENTAL TABLE 3. Candidate Variant List**

|                                    | <b>Variant</b> | <b>Location</b> |
|------------------------------------|----------------|-----------------|
| <i>RAD50, TH2LCRR (IL5)</i>        | rs2040704      | 5:131973177     |
| <i>RAD50, TH2LCRR (IL5)</i>        | rs6871536      | 5:131969874     |
| <i>IL5 (IL5)</i>                   | rs12652920     | 5:131885240     |
| <i>none (IL5)</i>                  | rs2079103      | 5:131864506     |
| <i>none (IL5)</i>                  | rs4143832      | 5:131862977     |
| <i>C5orf56 (IL5)</i>               | rs11242111     | 5:131756058     |
| <i>C5orf56, LOC102723741 (IL5)</i> | rs4451042      | 5:131755477     |
| <i>none (IL2)</i>                  | rs17389644     | 4:123497697     |
| <i>none (IL2)</i>                  | rs72669153     | 4:123429029     |
| <i>IL2 (IL2)</i>                   | rs2069763      | 4:123377482     |
| <i>IL2 (IL2)</i>                   | rs2069772      | 4:123373133     |
| <i>none (IL2)</i>                  | rs17454584     | 4:123353432     |
| <i>KIAA1109 (IL2)</i>              | rs4505848      | 4:123132492     |
| <i>LOC100130701 (GSK3B)</i>        | rs4676776      | 3:120106539     |
| <i>LOC100130701 (GSK3B)</i>        | rs4676768      | 3:120069736     |
| <i>NT5C3B (STAT5A)</i>             | rs4796712      | 17:39987130     |
| <i>FKBP10 (STAT5A)</i>             | rs8072866      | 17:39977862     |
| <i>FOS (FOS)</i>                   | rs138334429    | 14:75747512     |
| <i>FOS (FOS)</i>                   | rs4645855      | 14:75746869     |
| <i>FOS (FOS)</i>                   | rs1046117      | 14:75746690     |
| <i>none (AKT1)</i>                 | rs10146871     | 14:105110417    |
| <i>none (AKT1)</i>                 | rs4983514      | 14:105108578    |
| <i>none (AKT1)</i>                 | rs11621214     | 14:104808984    |
| <i>none (AKT1)</i>                 | rs8016091      | 14:104807712    |
| <i>IL13 (IL13)</i>                 | rs20541        | 5:131995964     |
| <i>IL13 (IL13)</i>                 | rs1295686      | 5:131995843     |
| <i>RAD50 (IL4/IL13)</i>            | rs2897443      | 5:131929594     |
| <i>RAD50 (IL4)</i>                 | rs60490216     | 5:131921885     |
| <i>C5orf56 (IL4)</i>               | rs2522056      | 5:131801726     |
| <i>C5orf56 (IL4)</i>               | rs2706383      | 5:131792402     |



**SUPPLEMENTAL TABLE 4. GWAS Results for selected variants by endpoint**

| Chromosome:<br>GRCh37<br>Position | RS ID       | Allele 1 | Allele 2 | Allele 1<br>Frequency | Accrued Duration of Remission |         |                   | Frequency of EGPA Relapse |         |                | Average OGC Daily Dose During<br>Last 4 Weeks |         |                |
|-----------------------------------|-------------|----------|----------|-----------------------|-------------------------------|---------|-------------------|---------------------------|---------|----------------|-----------------------------------------------|---------|----------------|
|                                   |             |          |          |                       | P value <sup>1</sup>          | Beta    | Standard<br>Error | P value                   | Beta    | Standard Error | P value                                       | Beta    | Standard Error |
| 10:10471329                       | rs2488170   | C        | A        | 0.60                  | 2.39E-05                      | -0.8222 | 0.1798            | 9.40E-04                  | 0.9079  | 0.2813         | 6.04E-01                                      | 0.1077  | 0.2066         |
| 10:10471416                       | rs2248309   | A        | G        | 0.60                  | 2.19E-05                      | -0.8227 | 0.1789            | 1.12E-03                  | 0.8944  | 0.2814         | 6.32E-01                                      | 0.0992  | 0.2060         |
| 10:10481352                       | rs2244527   | A        | C        | 0.59                  | 6.00E-06                      | -0.8380 | 0.1690            | 1.59E-03                  | 0.7826  | 0.2523         | 7.62E-01                                      | 0.0605  | 0.1990         |
| 10:10486211                       | rs2243951   | T        | A        | 0.57                  | 3.15E-06                      | -0.7938 | 0.1546            | 1.40E-03                  | 0.7643  | 0.2445         | 5.89E-01                                      | 0.0999  | 0.1837         |
| 10:112355675                      | rs533163688 | D        | R        | 0.82                  | 4.87E-05                      | -1.0751 | 0.2461            | 2.49E-01                  | 0.5009  | 0.4493         | 5.26E-01                                      | 0.1782  | 0.2791         |
| 10:129160098                      | rs2296638   | G        | A        | 0.68                  | 1.16E-05                      | -0.8775 | 0.1837            | 7.91E-02                  | 0.4785  | 0.2725         | 6.10E-01                                      | 0.1095  | 0.2137         |
| 10:14537686                       | rs6602734   | T        | A        | 0.65                  | 2.41E-03                      | 0.5845  | 0.1852            | 3.22E-01                  | -0.2402 | 0.2510         | 8.44E-05                                      | -0.7298 | 0.1723         |
| 10:14538274                       | rs943184    | A        | G        | 0.65                  | 2.40E-03                      | 0.5819  | 0.1843            | 3.34E-01                  | -0.2335 | 0.2499         | 7.61E-05                                      | -0.7302 | 0.1712         |
| 10:14543038                       | rs7088212   | T        | C        | 0.62                  | 5.60E-03                      | 0.5544  | 0.1938            | 2.99E-01                  | -0.2591 | 0.2593         | 7.14E-05                                      | -0.7598 | 0.1774         |
| 10:14543874                       | rs12772502  | T        | A        | 0.62                  | 5.32E-03                      | 0.5571  | 0.1935            | 2.98E-01                  | -0.2601 | 0.2594         | 6.93E-05                                      | -0.7604 | 0.1771         |
| 10:14548168                       | rs10796200  | T        | A        | 0.61                  | 5.27E-03                      | 0.5572  | 0.1933            | 2.58E-01                  | -0.2872 | 0.2649         | 8.72E-05                                      | -0.7505 | 0.1777         |
| 10:14548864                       | rs11259144  | C        | T        | 0.61                  | 4.92E-03                      | 0.5644  | 0.1941            | 2.60E-01                  | -0.2856 | 0.2634         | 5.78E-05                                      | -0.7710 | 0.1774         |
| 10:14553356                       | rs7076947   | A        | T        | 0.61                  | 4.17E-03                      | 0.5704  | 0.1923            | 2.41E-01                  | -0.2981 | 0.2645         | 5.71E-05                                      | -0.7664 | 0.1762         |
| 10:14556836                       | rs76919809  | T        | A        | 0.61                  | 4.17E-03                      | 0.5692  | 0.1919            | 2.31E-01                  | -0.3048 | 0.2648         | 5.31E-05                                      | -0.7674 | 0.1756         |
| 10:1647948                        | rs11250661  | C        | T        | 0.79                  | 8.56E-02                      | 0.4085  | 0.2350            | 8.18E-01                  | 0.0669  | 0.2910         | 2.62E-05                                      | -0.9281 | 0.2029         |
| 10:1648568                        | rs74108950  | C        | G        | 0.83                  | 8.53E-02                      | 0.4724  | 0.2715            | 9.44E-01                  | -0.0233 | 0.3319         | 9.62E-05                                      | -1.0051 | 0.2395         |
| 10:1648583                        | rs74108952  | G        | A        | 0.78                  | 2.97E-01                      | 0.2340  | 0.2238            | 9.39E-01                  | 0.0214  | 0.2797         | 5.02E-05                                      | -0.8429 | 0.1921         |
| 10:17339770                       | rs1822722   | T        | C        | 0.88                  | 9.20E-05                      | -1.8386 | 0.4396            | 1.61E-01                  | 1.0284  | 0.7393         | 1.75E-01                                      | 0.6691  | 0.4869         |
| 10:34127027                       | rs11596686  | A        | T        | 0.77                  | 9.89E-06                      | -1.0768 | 0.2234            | 5.49E-02                  | 0.6357  | 0.3450         | 4.12E-01                                      | 0.2143  | 0.2596         |
| 10:70070122                       | rs34887418  | I        | R        | 0.69                  | 5.52E-02                      | -0.4377 | 0.2250            | 8.85E-05                  | 1.1744  | 0.3152         | 2.42E-01                                      | 0.2667  | 0.2258         |
| 10:70130205                       | rs556378360 | C        | T        | 0.74                  | 3.08E-02                      | -0.7583 | 0.3445            | 6.46E-05                  | 1.8288  | 0.4736         | 1.11E-01                                      | 0.5594  | 0.3452         |
| 10:71065023                       | rs4364944   | T        | C        | 0.87                  | 3.17E-01                      | 0.3314  | 0.3306            | 6.22E-05                  | -1.3671 | 0.3195         | 5.42E-01                                      | -0.2006 | 0.3268         |
| 10:87203302                       | rs61421482  | T        | A        | 0.85                  | 8.52E-01                      | -0.0553 | 0.2963            | 2.74E-05                  | -1.3464 | 0.3099         | 4.86E-01                                      | -0.2034 | 0.2902         |
| 10:87206297                       | rs2882714   | T        | C        | 0.86                  | 9.70E-01                      | 0.0115  | 0.3081            | 2.20E-05                  | -1.3615 | 0.3090         | 4.76E-01                                      | -0.2163 | 0.3015         |
| 10:87206493                       | rs2351561   | A        | G        | 0.86                  | 8.24E-01                      | -0.0706 | 0.3174            | 5.70E-05                  | -1.3596 | 0.3228         | 4.17E-01                                      | -0.2538 | 0.3104         |
| 10:87209115                       | rs7896754   | T        | A        | 0.85                  | 8.47E-01                      | -0.0566 | 0.2933            | 2.03E-01                  | -0.2802 | 0.2220         | 5.29E-01                                      | -0.1822 | 0.2875         |
| 10:87213944                       | rs72827571  | C        | T        | 0.86                  | 9.84E-01                      | 0.0062  | 0.3060            | 2.13E-05                  | -1.3466 | 0.3044         | 4.98E-01                                      | -0.2044 | 0.2997         |
| 10:94612458                       | rs78586043  | T        | G        | 0.91                  | 2.72E-02                      | -0.8042 | 0.3570            | 8.01E-05                  | 5.9941  | 3.9273         | 5.58E-02                                      | 0.6928  | 0.3548         |
| 10:94622388                       | rs79873247  | A        | C        | 0.90                  | 2.52E-02                      | -0.7878 | 0.3448            | 7.60E-05                  | 5.6244  | 3.4348         | 5.79E-02                                      | 0.6644  | 0.3433         |

|              |             |   |   |      |          |         |        |          |          |          |          |         |        |
|--------------|-------------|---|---|------|----------|---------|--------|----------|----------|----------|----------|---------|--------|
| 10:94759305  | rs12413378  | A | G | 0.91 | 3.77E-02 | -0.7318 | 0.3461 | 3.06E-05 | 227.3440 | 124.8090 | 5.15E-02 | 0.6801  | 0.3419 |
| 10:94759873  | rs835245    | A | T | 0.80 | 9.08E-02 | -0.3932 | 0.2300 | 6.33E-05 | 1.6973   | 0.4865   | 7.41E-01 | 0.0769  | 0.2317 |
| 10:94764079  | rs71942995  | R | D | 0.92 | 1.22E-02 | -0.9099 | 0.3538 | 4.02E-05 | 245.1400 | 146.7470 | 3.59E-02 | 0.7600  | 0.3537 |
| 10:94767057  | rs56087738  | T | A | 0.92 | 1.25E-02 | -0.9075 | 0.3542 | 9.81E-05 | 95.6682  | 94.2747  | 3.62E-02 | 0.7594  | 0.3540 |
| 10:94768166  | rs10509649  | A | T | 0.92 | 1.23E-02 | -0.9101 | 0.3543 | 4.46E-05 | 239.2380 | 152.0010 | 3.63E-02 | 0.7594  | 0.3542 |
| 10:94770488  | rs17108042  | A | C | 0.92 | 1.24E-02 | -0.9092 | 0.3544 | 5.52E-05 | 243.2250 | 163.5500 | 3.62E-02 | 0.7598  | 0.3542 |
| 10:94770697  | rs17108043  | C | T | 0.92 | 1.24E-02 | -0.9092 | 0.3544 | 5.52E-05 | 243.2250 | 163.5500 | 3.62E-02 | 0.7598  | 0.3542 |
| 10:94772223  | rs17108050  | A | G | 0.92 | 1.25E-02 | -0.9091 | 0.3545 | 4.93E-05 | 250.9990 | 161.8840 | 3.63E-02 | 0.7598  | 0.3544 |
| 10:98960663  | rs1147593   | T | C | 0.75 | 7.01E-05 | 0.8512  | 0.1997 | 5.70E-01 | -0.1467  | 0.2553   | 4.63E-01 | -0.1663 | 0.2248 |
| 10:98961141  | rs1253415   | C | T | 0.75 | 7.04E-05 | 0.8507  | 0.1997 | 5.73E-01 | -0.1457  | 0.2552   | 4.64E-01 | -0.1657 | 0.2247 |
| 10:98962903  | rs1253410   | G | A | 0.73 | 1.64E-04 | 0.8174  | 0.2039 | 6.71E-01 | -0.1100  | 0.2556   | 4.95E-01 | -0.1532 | 0.2231 |
| 10:98966882  | rs877825    | G | A | 0.75 | 7.95E-05 | 0.8347  | 0.1975 | 6.26E-01 | -0.1244  | 0.2510   | 4.91E-01 | -0.1539 | 0.2220 |
| 10:98967359  | rs902466    | G | A | 0.75 | 7.75E-05 | 0.8380  | 0.1980 | 6.30E-01 | -0.1233  | 0.2516   | 4.90E-01 | -0.1545 | 0.2226 |
| 11:101660830 | rs141179114 | R | I | 0.90 | 8.07E-05 | -1.1663 | 0.2763 | 6.39E-02 | 0.8920   | 0.5397   | 4.43E-01 | 0.2395  | 0.3101 |
| 11:106424291 | rs1793068   | C | G | 0.77 | 9.91E-05 | -0.8689 | 0.2089 | 9.88E-02 | 0.5384   | 0.3372   | 4.22E-01 | 0.1888  | 0.2335 |
| 11:106427636 | rs1791600   | C | T | 0.77 | 7.48E-05 | -0.8602 | 0.2027 | 9.25E-02 | 0.5349   | 0.3289   | 4.19E-01 | 0.1853  | 0.2277 |
| 11:11767404  | rs113692989 | G | T | 0.94 | 1.55E-01 | 0.5999  | 0.4187 | 4.62E-05 | -1.3901  | 0.2965   | 8.31E-01 | -0.0901 | 0.4190 |
| 11:11767759  | rs76459442  | C | A | 0.94 | 1.57E-01 | 0.5962  | 0.4186 | 4.90E-05 | -1.3829  | 0.2958   | 7.75E-01 | -0.1202 | 0.4186 |
| 11:11769698  | rs74614980  | C | T | 0.94 | 1.55E-01 | 0.5991  | 0.4183 | 4.61E-05 | -1.3898  | 0.2964   | 8.32E-01 | -0.0890 | 0.4185 |
| 11:11770103  | rs55639928  | A | T | 0.94 | 1.55E-01 | 0.5985  | 0.4181 | 4.63E-05 | -1.3894  | 0.2964   | 8.33E-01 | -0.0888 | 0.4183 |
| 11:11771343  | rs58064499  | A | T | 0.94 | 1.55E-01 | 0.5980  | 0.4180 | 4.63E-05 | -1.3895  | 0.2965   | 8.36E-01 | -0.0872 | 0.4182 |
| 11:11772204  | rs11826231  | G | T | 0.94 | 1.55E-01 | 0.5978  | 0.4178 | 4.64E-05 | -1.3894  | 0.2965   | 8.36E-01 | -0.0869 | 0.4181 |
| 11:11774937  | rs7930827   | G | C | 0.94 | 1.57E-01 | 0.5952  | 0.4179 | 4.91E-05 | -1.3819  | 0.2956   | 7.75E-01 | -0.1200 | 0.4180 |
| 11:11776107  | rs16910044  | C | T | 0.94 | 1.58E-01 | 0.5955  | 0.4185 | 4.91E-05 | -1.3822  | 0.2956   | 7.79E-01 | -0.1179 | 0.4186 |
| 11:11777749  | rs7939727   | G | A | 0.94 | 1.29E-01 | 0.6428  | 0.4194 | 8.31E-05 | -1.3636  | 0.3014   | 9.44E-01 | -0.0295 | 0.4209 |
| 11:11780390  | rs74769387  | G | C | 0.94 | 1.29E-01 | 0.6372  | 0.4159 | 6.79E-05 | -1.3797  | 0.3019   | 9.51E-01 | 0.0259  | 0.4174 |
| 11:11780607  | rs16924665  | T | C | 0.94 | 1.30E-01 | 0.6352  | 0.4159 | 6.73E-05 | -1.3803  | 0.3019   | 9.51E-01 | 0.0259  | 0.4173 |
| 11:11781604  | rs78105203  | G | A | 0.94 | 1.30E-01 | 0.6350  | 0.4160 | 6.72E-05 | -1.3830  | 0.3026   | 9.10E-01 | 0.0474  | 0.4174 |
| 11:124060058 | rs2724660   | C | T | 0.57 | 4.02E-01 | -0.1564 | 0.1863 | 5.74E-01 | -0.1232  | 0.2155   | 1.11E-05 | -0.7486 | 0.1554 |
| 11:124064042 | rs113288402 | I | R | 0.56 | 3.83E-01 | -0.1653 | 0.1892 | 5.72E-01 | -0.1251  | 0.2181   | 9.17E-06 | -0.7669 | 0.1574 |
| 11:124065057 | rs2508891   | A | G | 0.65 | 7.29E-01 | -0.0666 | 0.1924 | 5.63E-01 | -0.1293  | 0.2216   | 6.05E-05 | -0.7114 | 0.1642 |
| 11:124066627 | rs2846236   | A | G | 0.57 | 4.37E-01 | -0.1466 | 0.1885 | 5.57E-01 | -0.1294  | 0.2165   | 6.21E-06 | -0.7746 | 0.1555 |
| 11:124070913 | rs10667412  | I | R | 0.57 | 4.55E-01 | -0.1414 | 0.1891 | 5.49E-01 | -0.1321  | 0.2168   | 4.78E-06 | -0.7846 | 0.1553 |
| 11:124070987 | rs2724662   | T | A | 0.57 | 4.55E-01 | -0.1413 | 0.1891 | 9.71E-01 | -0.0181  | 0.4983   | 4.43E-01 | -0.2432 | 0.3150 |

|              |             |   |   |      |          |         |        |          |         |        |          |         |        |
|--------------|-------------|---|---|------|----------|---------|--------|----------|---------|--------|----------|---------|--------|
| 11:124071288 | rs11607309  | T | C | 0.62 | 5.20E-01 | 0.1361  | 0.2117 | 3.33E-01 | 0.2528  | 0.2669 | 8.76E-05 | 0.7700  | 0.1823 |
| 11:124071802 | rs4936909   | A | G | 0.62 | 5.25E-01 | 0.1343  | 0.2116 | 3.32E-01 | 0.2534  | 0.2668 | 8.66E-05 | 0.7702  | 0.1822 |
| 11:124072231 | rs2724664   | G | A | 0.57 | 4.62E-01 | -0.1391 | 0.1892 | 5.46E-01 | -0.1330 | 0.2168 | 4.49E-06 | -0.7868 | 0.1552 |
| 11:124073762 | rs2846241   | G | A | 0.57 | 4.57E-01 | -0.1409 | 0.1892 | 5.47E-01 | -0.1327 | 0.2168 | 4.40E-06 | -0.7874 | 0.1551 |
| 11:124075787 | rs3018529   | C | A | 0.57 | 4.69E-01 | -0.1370 | 0.1893 | 5.44E-01 | -0.1339 | 0.2169 | 4.27E-06 | -0.7885 | 0.1551 |
| 11:124077164 | rs2846228   | A | C | 0.57 | 4.68E-01 | -0.1374 | 0.1894 | 5.46E-01 | -0.1330 | 0.2169 | 4.31E-06 | -0.7886 | 0.1552 |
| 11:124077182 | rs2724666   | T | C | 0.66 | 7.78E-01 | -0.0547 | 0.1941 | 5.49E-01 | -0.1345 | 0.2227 | 3.87E-05 | -0.7337 | 0.1644 |
| 11:124079006 | rs1939863   | G | A | 0.66 | 7.75E-01 | -0.0553 | 0.1940 | 5.47E-01 | -0.1350 | 0.2226 | 3.87E-05 | -0.7332 | 0.1643 |
| 11:124079146 | rs2846230   | T | A | 0.66 | 7.75E-01 | -0.0553 | 0.1940 | 5.48E-01 | -0.1350 | 0.2226 | 3.87E-05 | -0.7332 | 0.1643 |
| 11:124079534 | rs10893167  | T | C | 0.62 | 5.45E-01 | 0.1280  | 0.2114 | 3.28E-01 | 0.2552  | 0.2667 | 8.38E-05 | 0.7704  | 0.1819 |
| 11:124079608 | rs56980257  | R | I | 0.62 | 5.45E-01 | 0.1280  | 0.2114 | 3.28E-01 | 0.2552  | 0.2667 | 8.38E-05 | 0.7704  | 0.1819 |
| 11:124080543 | rs2508887   | C | T | 0.66 | 7.79E-01 | -0.0544 | 0.1940 | 5.47E-01 | -0.1353 | 0.2226 | 3.85E-05 | -0.7334 | 0.1643 |
| 11:124081303 | rs10893169  | A | C | 0.62 | 5.45E-01 | 0.1280  | 0.2114 | 3.28E-01 | 0.2553  | 0.2667 | 8.38E-05 | 0.7705  | 0.1819 |
| 11:124081628 | rs4245049   | G | A | 0.62 | 5.45E-01 | 0.1280  | 0.2114 | 3.28E-01 | 0.2552  | 0.2667 | 8.37E-05 | 0.7705  | 0.1818 |
| 11:124083149 | rs10790652  | A | G | 0.62 | 5.45E-01 | 0.1280  | 0.2114 | 3.28E-01 | 0.2552  | 0.2667 | 8.37E-05 | 0.7705  | 0.1818 |
| 11:124084653 | rs2846232   | T | C | 0.66 | 7.79E-01 | -0.0543 | 0.1940 | 5.47E-01 | -0.1353 | 0.2226 | 3.84E-05 | -0.7334 | 0.1643 |
| 11:124085462 | rs948071    | A | G | 0.66 | 7.79E-01 | -0.0543 | 0.1940 | 5.47E-01 | -0.1353 | 0.2226 | 3.84E-05 | -0.7334 | 0.1643 |
| 11:124087308 | rs2846233   | C | T | 0.66 | 7.79E-01 | -0.0543 | 0.1940 | 5.47E-01 | -0.1352 | 0.2226 | 3.85E-05 | -0.7333 | 0.1643 |
| 11:124092948 | rs56319546  | G | A | 0.67 | 8.01E-01 | -0.0490 | 0.1947 | 5.44E-01 | -0.1376 | 0.2247 | 2.72E-05 | -0.7480 | 0.1639 |
| 11:124093501 | rs55893764  | G | T | 0.66 | 7.86E-01 | -0.0526 | 0.1941 | 5.44E-01 | -0.1361 | 0.2227 | 3.88E-05 | -0.7334 | 0.1644 |
| 11:124093595 | rs56220198  | C | T | 0.66 | 7.80E-01 | -0.0542 | 0.1940 | 5.47E-01 | -0.1353 | 0.2226 | 3.84E-05 | -0.7334 | 0.1643 |
| 11:124093969 | rs79704045  | R | D | 0.66 | 7.78E-01 | -0.0548 | 0.1943 | 5.47E-01 | -0.1353 | 0.2229 | 3.66E-05 | -0.7365 | 0.1645 |
| 11:124096988 | rs61907159  | A | G | 0.66 | 7.79E-01 | -0.0543 | 0.1940 | 5.47E-01 | -0.1353 | 0.2226 | 3.84E-05 | -0.7334 | 0.1643 |
| 11:124097349 | rs61908760  | A | G | 0.66 | 7.79E-01 | -0.0543 | 0.1940 | 5.47E-01 | -0.1353 | 0.2226 | 3.84E-05 | -0.7334 | 0.1643 |
| 11:124097525 | rs61908761  | A | G | 0.66 | 7.79E-01 | -0.0543 | 0.1940 | 5.47E-01 | -0.1353 | 0.2226 | 3.84E-05 | -0.7334 | 0.1643 |
| 11:124102197 | rs61313084  | R | I | 0.66 | 7.79E-01 | -0.0543 | 0.1940 | 5.47E-01 | -0.1354 | 0.2226 | 3.85E-05 | -0.7334 | 0.1643 |
| 11:124102986 | rs150770491 | R | I | 0.66 | 7.79E-01 | -0.0543 | 0.1940 | 5.47E-01 | -0.1354 | 0.2226 | 3.85E-05 | -0.7335 | 0.1643 |
| 11:124103659 | rs7482314   | T | A | 0.66 | 7.79E-01 | -0.0545 | 0.1940 | 5.47E-01 | -0.1353 | 0.2226 | 3.84E-05 | -0.7336 | 0.1643 |
| 11:124105982 | rs7114422   | G | A | 0.66 | 7.79E-01 | -0.0544 | 0.1940 | 5.47E-01 | -0.1354 | 0.2226 | 3.84E-05 | -0.7336 | 0.1643 |
| 11:124108081 | rs367723701 | G | A | 0.65 | 7.74E-01 | -0.0561 | 0.1953 | 5.43E-01 | -0.1376 | 0.2239 | 4.37E-05 | -0.7340 | 0.1658 |
| 11:124108082 | rs371165889 | T | C | 0.65 | 7.74E-01 | -0.0561 | 0.1953 | 5.43E-01 | -0.1376 | 0.2239 | 4.37E-05 | -0.7340 | 0.1658 |
| 11:124109918 | rs4482035   | T | C | 0.66 | 7.78E-01 | -0.0545 | 0.1940 | 5.47E-01 | -0.1352 | 0.2226 | 3.85E-05 | -0.7334 | 0.1643 |
| 11:124110080 | rs11219520  | A | G | 0.66 | 7.79E-01 | -0.0543 | 0.1940 | 5.47E-01 | -0.1353 | 0.2226 | 3.84E-05 | -0.7334 | 0.1643 |
| 11:124111774 | rs11219523  | A | G | 0.67 | 7.99E-01 | -0.0495 | 0.1945 | 5.46E-01 | -0.1366 | 0.2243 | 2.69E-05 | -0.7475 | 0.1637 |

|              |             |   |   |      |          |         |        |          |         |        |          |         |        |
|--------------|-------------|---|---|------|----------|---------|--------|----------|---------|--------|----------|---------|--------|
| 11:124114644 | rs11219526  | C | T | 0.66 | 7.79E-01 | -0.0544 | 0.1940 | 5.47E-01 | -0.1353 | 0.2226 | 3.85E-05 | -0.7335 | 0.1643 |
| 11:124115001 | rs17771860  | G | C | 0.66 | 7.79E-01 | -0.0544 | 0.1941 | 5.47E-01 | -0.1353 | 0.2228 | 3.82E-05 | -0.7341 | 0.1644 |
| 11:124116213 | rs12804360  | T | C | 0.56 | 2.51E-01 | 0.2313  | 0.2010 | 7.03E-01 | 0.0868  | 0.2248 | 9.97E-05 | 0.7317  | 0.1748 |
| 11:124116657 | rs11607806  | G | T | 0.51 | 3.03E-01 | 0.1888  | 0.1827 | 7.40E-01 | 0.0689  | 0.2039 | 9.91E-05 | 0.6641  | 0.1586 |
| 11:124116691 | rs11603607  | A | G | 0.51 | 3.03E-01 | 0.1888  | 0.1827 | 7.40E-01 | 0.0689  | 0.2039 | 9.91E-05 | 0.6641  | 0.1586 |
| 11:124116707 | rs11601644  | T | G | 0.51 | 3.03E-01 | 0.1888  | 0.1827 | 7.40E-01 | 0.0689  | 0.2039 | 9.91E-05 | 0.6641  | 0.1586 |
| 11:124118578 | rs11219532  | C | T | 0.66 | 7.77E-01 | -0.0550 | 0.1942 | 5.48E-01 | -0.1352 | 0.2228 | 3.83E-05 | -0.7345 | 0.1645 |
| 11:124120821 | rs12099154  | T | C | 0.66 | 7.77E-01 | -0.0549 | 0.1941 | 5.47E-01 | -0.1353 | 0.2227 | 3.82E-05 | -0.7342 | 0.1644 |
| 11:124123105 | rs11219536  | T | C | 0.66 | 7.76E-01 | -0.0552 | 0.1941 | 5.47E-01 | -0.1352 | 0.2227 | 3.83E-05 | -0.7341 | 0.1644 |
| 11:124124924 | rs12224218  | C | A | 0.66 | 7.77E-01 | -0.0549 | 0.1941 | 5.47E-01 | -0.1353 | 0.2227 | 3.82E-05 | -0.7342 | 0.1644 |
| 11:124126219 | rs10502286  | T | C | 0.66 | 7.77E-01 | -0.0549 | 0.1941 | 5.47E-01 | -0.1353 | 0.2227 | 3.82E-05 | -0.7342 | 0.1644 |
| 11:124132094 | rs66595435  | A | G | 0.66 | 7.75E-01 | -0.0553 | 0.1942 | 5.47E-01 | -0.1353 | 0.2227 | 3.81E-05 | -0.7344 | 0.1644 |
| 11:124133238 | rs2512175   | A | T | 0.50 | 3.74E-01 | 0.1608  | 0.1804 | 8.00E-01 | 0.0516  | 0.1997 | 9.64E-05 | 0.6551  | 0.1562 |
| 11:124134552 | rs2466636   | C | T | 0.50 | 6.20E-01 | 0.0901  | 0.1819 | 8.59E-01 | 0.0362  | 0.1997 | 5.18E-05 | 0.6787  | 0.1550 |
| 11:124142711 | rs7120833   | A | T | 0.66 | 7.84E-01 | -0.0533 | 0.1947 | 5.56E-01 | -0.1327 | 0.2233 | 3.94E-05 | -0.7351 | 0.1649 |
| 11:124144266 | rs11219548  | G | A | 0.62 | 5.48E-01 | 0.1269  | 0.2116 | 3.28E-01 | 0.2556  | 0.2668 | 8.21E-05 | 0.7720  | 0.1819 |
| 11:124149102 | rs34374349  | R | D | 0.66 | 7.89E-01 | -0.0520 | 0.1950 | 5.62E-01 | -0.1306 | 0.2236 | 4.07E-05 | -0.7351 | 0.1653 |
| 11:124150614 | rs11219554  | C | G | 0.65 | 7.90E-01 | -0.0517 | 0.1950 | 5.64E-01 | -0.1302 | 0.2236 | 4.09E-05 | -0.7350 | 0.1653 |
| 11:124151297 | rs11537156  | A | G | 0.65 | 7.91E-01 | -0.0516 | 0.1950 | 5.64E-01 | -0.1300 | 0.2236 | 4.11E-05 | -0.7350 | 0.1653 |
| 11:124152329 | rs61907298  | C | A | 0.65 | 7.92E-01 | -0.0515 | 0.1951 | 5.65E-01 | -0.1298 | 0.2237 | 4.12E-05 | -0.7350 | 0.1654 |
| 11:124152515 | rs12223329  | C | T | 0.67 | 6.69E-01 | -0.0845 | 0.1976 | 6.21E-01 | -0.1132 | 0.2273 | 5.00E-05 | -0.7384 | 0.1683 |
| 11:124152889 | rs11530584  | C | T | 0.65 | 7.92E-01 | -0.0514 | 0.1951 | 5.65E-01 | -0.1296 | 0.2237 | 4.13E-05 | -0.7350 | 0.1654 |
| 11:124153111 | rs11534469  | G | C | 0.65 | 7.92E-01 | -0.0513 | 0.1951 | 5.65E-01 | -0.1296 | 0.2237 | 4.13E-05 | -0.7350 | 0.1654 |
| 11:124153183 | rs201326530 | R | D | 0.65 | 9.76E-01 | -0.0063 | 0.2093 | 7.52E-01 | -0.0757 | 0.2365 | 1.94E-05 | -0.8162 | 0.1751 |
| 11:124153273 | rs11559532  | A | G | 0.65 | 7.92E-01 | -0.0513 | 0.1951 | 5.66E-01 | -0.1295 | 0.2237 | 4.14E-05 | -0.7350 | 0.1654 |
| 11:124153615 | rs12226556  | A | G | 0.65 | 7.92E-01 | -0.0512 | 0.1951 | 5.66E-01 | -0.1295 | 0.2237 | 4.14E-05 | -0.7350 | 0.1654 |
| 11:124154583 | rs61907299  | C | G | 0.65 | 7.94E-01 | -0.0510 | 0.1952 | 5.67E-01 | -0.1291 | 0.2238 | 4.17E-05 | -0.7349 | 0.1655 |
| 11:124160014 | rs11219561  | C | T | 0.65 | 8.01E-01 | -0.0492 | 0.1955 | 5.76E-01 | -0.1263 | 0.2241 | 4.38E-05 | -0.7344 | 0.1659 |
| 11:124160443 | rs7952230   | A | G | 0.65 | 8.01E-01 | -0.0492 | 0.1955 | 5.76E-01 | -0.1262 | 0.2241 | 4.38E-05 | -0.7344 | 0.1659 |
| 11:124161917 | rs11219562  | A | G | 0.62 | 5.54E-01 | 0.1251  | 0.2117 | 3.27E-01 | 0.2560  | 0.2669 | 8.00E-05 | 0.7734  | 0.1820 |
| 11:124162350 | rs4606489   | A | T | 0.62 | 5.55E-01 | 0.1250  | 0.2117 | 3.27E-01 | 0.2560  | 0.2669 | 7.98E-05 | 0.7735  | 0.1820 |
| 11:124166827 | rs373754923 | A | G | 0.65 | 8.89E-01 | -0.0284 | 0.2046 | 5.53E-01 | -0.1399 | 0.2343 | 3.31E-05 | -0.7788 | 0.1727 |
| 11:124166908 | rs112420563 | A | G | 0.63 | 7.72E-01 | -0.0595 | 0.2057 | 5.73E-01 | -0.1321 | 0.2328 | 3.22E-05 | -0.7843 | 0.1737 |
| 11:124166923 | rs73019676  | A | G | 0.64 | 7.79E-01 | -0.0582 | 0.2074 | 6.36E-01 | -0.1115 | 0.2341 | 2.81E-05 | -0.7959 | 0.1747 |

|              |             |   |   |      |          |         |        |          |         |        |          |         |        |
|--------------|-------------|---|---|------|----------|---------|--------|----------|---------|--------|----------|---------|--------|
| 11:124166935 | rs73019677  | A | G | 0.63 | 7.84E-01 | -0.0565 | 0.2059 | 5.85E-01 | -0.1281 | 0.2330 | 3.50E-05 | -0.7820 | 0.1741 |
| 11:124166950 | rs73019679  | A | G | 0.63 | 7.69E-01 | -0.0604 | 0.2064 | 5.84E-01 | -0.1289 | 0.2337 | 4.20E-05 | -0.7771 | 0.1751 |
| 11:124167366 | rs61907300  | A | G | 0.65 | 8.23E-01 | -0.0438 | 0.1961 | 6.00E-01 | -0.1185 | 0.2246 | 5.10E-05 | -0.7309 | 0.1668 |
| 11:124169990 | rs59650091  | T | C | 0.65 | 8.25E-01 | -0.0433 | 0.1961 | 6.03E-01 | -0.1177 | 0.2246 | 5.19E-05 | -0.7303 | 0.1668 |
| 11:124172609 | rs59909754  | R | I | 0.63 | 6.87E-01 | -0.0792 | 0.1967 | 7.06E-01 | -0.0861 | 0.2254 | 9.63E-05 | -0.7104 | 0.1693 |
| 11:124175370 | rs56098955  | C | A | 0.65 | 8.30E-01 | -0.0420 | 0.1961 | 6.09E-01 | -0.1157 | 0.2247 | 5.43E-05 | -0.7290 | 0.1670 |
| 11:124178666 | rs11219580  | A | T | 0.65 | 8.33E-01 | -0.0412 | 0.1962 | 6.12E-01 | -0.1149 | 0.2247 | 5.53E-05 | -0.7283 | 0.1671 |
| 11:124181011 | rs519158    | T | G | 0.65 | 8.38E-01 | -0.0401 | 0.1962 | 6.16E-01 | -0.1133 | 0.2247 | 5.74E-05 | -0.7269 | 0.1672 |
| 11:124181444 | rs515403    | A | G | 0.65 | 8.38E-01 | -0.0400 | 0.1962 | 6.17E-01 | -0.1132 | 0.2247 | 5.76E-05 | -0.7269 | 0.1672 |
| 11:124181449 | rs515395    | C | T | 0.66 | 8.52E-01 | -0.0366 | 0.1969 | 6.18E-01 | -0.1138 | 0.2264 | 4.06E-05 | -0.7423 | 0.1668 |
| 11:124181846 | rs490740    | T | C | 0.65 | 8.39E-01 | -0.0399 | 0.1962 | 6.18E-01 | -0.1130 | 0.2247 | 5.77E-05 | -0.7268 | 0.1672 |
| 11:124187240 | rs500901    | A | G | 0.65 | 8.42E-01 | -0.0390 | 0.1963 | 6.25E-01 | -0.1107 | 0.2249 | 5.99E-05 | -0.7260 | 0.1675 |
| 11:124193170 | rs507104    | T | C | 0.65 | 8.46E-01 | -0.0382 | 0.1964 | 6.30E-01 | -0.1090 | 0.2249 | 6.16E-05 | -0.7253 | 0.1676 |
| 11:124198828 | rs4057919   | C | T | 0.67 | 8.41E-01 | -0.0399 | 0.1991 | 5.93E-01 | -0.1248 | 0.2313 | 1.82E-05 | -0.7787 | 0.1664 |
| 11:124205935 | rs142623810 | R | I | 0.66 | 8.28E-01 | -0.0435 | 0.2007 | 6.96E-01 | -0.0906 | 0.2298 | 5.64E-05 | -0.7446 | 0.1711 |
| 11:124207477 | rs200293461 | R | D | 0.65 | 8.58E-01 | -0.0351 | 0.1967 | 6.49E-01 | -0.1033 | 0.2252 | 6.67E-05 | -0.7234 | 0.1681 |
| 11:124207479 | rs61911101  | G | C | 0.65 | 8.58E-01 | -0.0351 | 0.1967 | 6.49E-01 | -0.1033 | 0.2252 | 6.67E-05 | -0.7234 | 0.1681 |
| 11:124207510 | rs11219597  | G | A | 0.71 | 3.84E-01 | 0.1988  | 0.2280 | 2.77E-01 | 0.2912  | 0.2701 | 4.16E-05 | 0.8640  | 0.1945 |
| 11:124209483 | rs507118    | C | T | 0.65 | 8.56E-01 | -0.0357 | 0.1968 | 6.53E-01 | -0.1020 | 0.2253 | 6.85E-05 | -0.7228 | 0.1682 |
| 11:124209777 | rs509878    | C | T | 0.66 | 8.75E-01 | -0.0311 | 0.1973 | 6.55E-01 | -0.1020 | 0.2266 | 4.89E-05 | -0.7369 | 0.1677 |
| 11:124213673 | rs637057    | G | A | 0.65 | 8.64E-01 | -0.0338 | 0.1968 | 6.57E-01 | -0.1006 | 0.2252 | 7.02E-05 | -0.7216 | 0.1682 |
| 11:124219110 | rs564202    | A | G | 0.65 | 8.70E-01 | -0.0322 | 0.1967 | 6.66E-01 | -0.0978 | 0.2251 | 7.31E-05 | -0.7200 | 0.1683 |
| 11:124224662 | rs600686    | A | C | 0.65 | 8.75E-01 | -0.0309 | 0.1967 | 6.74E-01 | -0.0952 | 0.2250 | 7.63E-05 | -0.7182 | 0.1684 |
| 11:124226577 | rs504362    | C | T | 0.66 | 8.86E-01 | -0.0283 | 0.1975 | 6.92E-01 | -0.0902 | 0.2265 | 5.62E-05 | -0.7325 | 0.1682 |
| 11:124262346 | rs202110706 | A | G | 0.69 | 7.88E-01 | -0.0611 | 0.2281 | 8.86E-01 | -0.0360 | 0.2486 | 2.65E-05 | -0.8774 | 0.1919 |
| 11:124696112 | rs570483    | G | A | 0.66 | 7.79E-05 | 0.8041  | 0.1900 | 3.53E-01 | -0.2310 | 0.2423 | 4.53E-03 | -0.5905 | 0.1998 |
| 11:129490119 | rs77436888  | G | A | 0.88 | 9.90E-05 | 1.8615  | 0.4474 | 3.56E-01 | -0.6342 | 0.6644 | 1.37E-02 | -1.2125 | 0.4768 |
| 11:130087978 | rs858725    | C | T | 0.81 | 2.60E-05 | 0.8766  | 0.1927 | 9.01E-01 | -0.0379 | 0.2891 | 7.78E-02 | -0.3873 | 0.2156 |
| 11:130104498 | rs17605148  | A | T | 0.83 | 7.78E-05 | 1.0443  | 0.2468 | 4.25E-01 | -0.2869 | 0.3569 | 6.61E-02 | -0.5066 | 0.2704 |
| 11:131843583 | rs34692300  | C | T | 0.84 | 3.68E-01 | 0.2422  | 0.2685 | 9.89E-01 | 0.0047  | 0.3301 | 3.14E-05 | -1.0315 | 0.2281 |
| 11:131848471 | rs71485708  | C | T | 0.84 | 3.64E-01 | 0.2388  | 0.2626 | 9.99E-01 | -0.0003 | 0.3249 | 4.32E-05 | -0.9939 | 0.2243 |
| 11:132719696 | rs4937735   | T | C | 0.77 | 2.92E-01 | -0.2573 | 0.2434 | 8.69E-03 | 1.0046  | 0.3889 | 7.47E-05 | 0.8982  | 0.2103 |
| 11:18778478  | rs10832977  | A | C | 0.80 | 4.20E-05 | -1.1847 | 0.2686 | 6.81E-02 | 0.7615  | 0.4201 | 1.15E-02 | 0.7561  | 0.2896 |
| 11:24041531  | rs10834263  | C | T | 0.68 | 8.87E-05 | 0.7718  | 0.1841 | 3.23E-01 | -0.2448 | 0.2494 | 5.95E-03 | -0.5541 | 0.1939 |

|             |             |   |   |      |          |         |        |          |         |        |          |         |        |
|-------------|-------------|---|---|------|----------|---------|--------|----------|---------|--------|----------|---------|--------|
| 11:24043815 | rs12295367  | T | G | 0.68 | 8.09E-05 | 0.7684  | 0.1821 | 3.16E-01 | -0.2459 | 0.2467 | 6.36E-03 | -0.5449 | 0.1923 |
| 11:24044674 | rs10834264  | G | A | 0.69 | 9.07E-05 | 0.7540  | 0.1801 | 3.07E-01 | -0.2478 | 0.2441 | 7.27E-03 | -0.5298 | 0.1903 |
| 11:24045029 | rs10834265  | C | T | 0.32 | 8.15E-05 | -0.7663 | 0.1817 | 3.15E-01 | 0.2452  | 0.2459 | 6.28E-03 | 0.5444  | 0.1919 |
| 11:24046032 | rs55851544  | R | D | 0.69 | 5.00E-05 | 0.8496  | 0.1948 | 3.00E-01 | -0.2795 | 0.2713 | 8.84E-03 | -0.5655 | 0.2086 |
| 11:24047010 | rs4923149   | C | A | 0.68 | 5.84E-05 | 0.7810  | 0.1810 | 2.44E-01 | -0.2852 | 0.2447 | 1.00E-02 | -0.5157 | 0.1936 |
| 11:24048346 | rs2403884   | C | T | 0.68 | 5.55E-05 | 0.7813  | 0.1804 | 2.43E-01 | -0.2847 | 0.2441 | 1.03E-02 | -0.5127 | 0.1933 |
| 11:24048870 | rs10466429  | T | C | 0.33 | 5.48E-05 | -0.7878 | 0.1818 | 2.41E-01 | 0.2880  | 0.2457 | 9.28E-03 | 0.5236  | 0.1944 |
| 11:24049673 | rs5790382   | I | R | 0.33 | 5.64E-05 | -0.7863 | 0.1818 | 2.41E-01 | 0.2878  | 0.2460 | 7.94E-03 | 0.5334  | 0.1939 |
| 11:24050159 | rs11027667  | G | A | 0.71 | 4.82E-05 | 0.8115  | 0.1856 | 3.34E-01 | -0.2374 | 0.2464 | 7.39E-03 | -0.5509 | 0.1983 |
| 11:24050237 | rs10767154  | G | A | 0.33 | 5.63E-05 | -0.7862 | 0.1817 | 2.42E-01 | 0.2874  | 0.2458 | 7.95E-03 | 0.5332  | 0.1938 |
| 11:24051340 | rs61655096  | R | D | 0.74 | 4.94E-05 | 0.8345  | 0.1912 | 3.72E-01 | -0.2286 | 0.2568 | 1.42E-03 | -0.6670 | 0.1988 |
| 11:24053257 | rs61876465  | G | A | 0.72 | 4.89E-05 | 0.8016  | 0.1836 | 3.16E-01 | -0.2429 | 0.2430 | 8.28E-03 | -0.5372 | 0.1964 |
| 11:24056701 | rs11027675  | G | A | 0.72 | 5.47E-05 | 0.7946  | 0.1833 | 3.22E-01 | -0.2392 | 0.2421 | 8.72E-03 | -0.5322 | 0.1959 |
| 11:24058345 | rs11027676  | G | C | 0.36 | 1.97E-05 | -0.7846 | 0.1695 | 2.41E-01 | 0.2730  | 0.2356 | 9.50E-03 | 0.4954  | 0.1846 |
| 11:24058731 | rs35306297  | C | G | 0.68 | 6.00E-05 | 0.7743  | 0.1798 | 2.47E-01 | -0.2817 | 0.2438 | 9.43E-03 | -0.5161 | 0.1920 |
| 11:24060691 | rs7949813   | G | A | 0.71 | 7.79E-05 | 0.7587  | 0.1793 | 3.44E-01 | -0.2200 | 0.2324 | 2.48E-02 | -0.4464 | 0.1936 |
| 11:24061085 | rs4412756   | T | G | 0.71 | 4.06E-05 | 0.8210  | 0.1857 | 3.54E-01 | -0.2290 | 0.2480 | 1.11E-02 | -0.5258 | 0.2002 |
| 11:24061337 | rs4372449   | C | T | 0.69 | 7.87E-05 | 0.7634  | 0.1805 | 3.34E-01 | -0.2352 | 0.2453 | 6.85E-03 | -0.5360 | 0.1910 |
| 11:24061481 | rs4427563   | G | A | 0.72 | 4.69E-05 | 0.8104  | 0.1851 | 3.61E-01 | -0.2250 | 0.2474 | 9.78E-03 | -0.5310 | 0.1986 |
| 11:24064534 | rs7115164   | C | T | 0.69 | 8.88E-05 | 0.7695  | 0.1835 | 3.73E-01 | -0.2207 | 0.2504 | 7.01E-03 | -0.5424 | 0.1939 |
| 11:24065625 | rs72881122  | G | T | 0.71 | 3.01E-05 | 0.8480  | 0.1882 | 3.90E-01 | -0.2176 | 0.2542 | 4.72E-03 | -0.5916 | 0.2011 |
| 11:24067367 | rs1915049   | T | A | 0.69 | 7.38E-05 | 0.7924  | 0.1866 | 4.54E-01 | -0.1901 | 0.2576 | 8.44E-03 | -0.5411 | 0.1983 |
| 11:24067498 | rs1915050   | G | C | 0.34 | 3.84E-05 | -0.8338 | 0.1879 | 4.88E-01 | 0.1811  | 0.2650 | 1.63E-02 | 0.5050  | 0.2040 |
| 11:24067879 | rs10834269  | A | G | 0.71 | 6.62E-05 | 0.7968  | 0.1862 | 4.79E-01 | -0.1722 | 0.2447 | 3.10E-02 | -0.4476 | 0.2023 |
| 11:24070434 | rs1996751   | G | A | 0.71 | 6.86E-05 | 0.8277  | 0.1939 | 5.45E-01 | -0.1649 | 0.2773 | 9.86E-03 | -0.5522 | 0.2068 |
| 11:24072469 | rs11027684  | A | G | 0.71 | 8.06E-05 | 0.8332  | 0.1974 | 5.96E-01 | -0.1384 | 0.2638 | 3.13E-02 | -0.4719 | 0.2138 |
| 11:24072558 | rs11027685  | G | T | 0.72 | 8.08E-05 | 0.8326  | 0.1973 | 5.99E-01 | -0.1370 | 0.2636 | 3.16E-02 | -0.4709 | 0.2137 |
| 11:24073794 | rs1996652   | A | G | 0.66 | 9.62E-05 | 0.7810  | 0.1873 | 6.93E-01 | -0.1010 | 0.2619 | 8.71E-02 | -0.3575 | 0.2053 |
| 11:24074207 | rs11027689  | G | A | 0.69 | 4.15E-05 | 0.8489  | 0.1923 | 7.79E-01 | -0.0737 | 0.2666 | 4.51E-02 | -0.4338 | 0.2118 |
| 11:24074862 | rs11027691  | C | T | 0.66 | 9.91E-05 | 0.7835  | 0.1883 | 7.16E-01 | -0.0937 | 0.2633 | 8.78E-02 | -0.3584 | 0.2064 |
| 11:24075258 | rs151303153 | R | I | 0.71 | 5.53E-05 | 0.8864  | 0.2047 | 7.83E-01 | -0.0772 | 0.2836 | 3.97E-02 | -0.4712 | 0.2239 |
| 11:24075628 | rs146625252 | R | D | 0.69 | 4.28E-05 | 0.8521  | 0.1934 | 8.01E-01 | -0.0666 | 0.2682 | 4.67E-02 | -0.4331 | 0.2130 |
| 11:24076734 | rs11027693  | T | G | 0.67 | 6.52E-05 | 0.8039  | 0.1877 | 6.72E-01 | -0.1040 | 0.2496 | 1.35E-01 | -0.3163 | 0.2084 |
| 11:24080703 | rs58055352  | D | R | 0.36 | 7.35E-05 | -0.8289 | 0.1951 | 7.47E-01 | 0.0862  | 0.2732 | 8.71E-02 | 0.3740  | 0.2149 |

|             |             |   |   |      |          |         |        |          |         |        |          |         |        |
|-------------|-------------|---|---|------|----------|---------|--------|----------|---------|--------|----------|---------|--------|
| 11:24083290 | rs11027698  | T | C | 0.69 | 4.92E-05 | 0.8693  | 0.1991 | 8.57E-01 | -0.0490 | 0.2767 | 5.36E-02 | -0.4320 | 0.2192 |
| 11:24083487 | rs138997652 | R | D | 0.69 | 4.82E-05 | 0.8678  | 0.1985 | 8.74E-01 | -0.0431 | 0.2764 | 5.29E-02 | -0.4320 | 0.2186 |
| 11:24083553 | rs11027699  | A | G | 0.68 | 4.53E-05 | 0.8733  | 0.1990 | 8.82E-01 | -0.0408 | 0.2784 | 5.19E-02 | -0.4352 | 0.2193 |
| 11:24086146 | rs4145286   | A | G | 0.36 | 9.79E-05 | -0.8430 | 0.2024 | 9.22E-01 | 0.0286  | 0.2999 | 5.27E-02 | 0.4357  | 0.2202 |
| 11:35233221 | rs67804554  | R | D | 0.62 | 2.09E-01 | -0.2928 | 0.2318 | 9.90E-01 | -0.0035 | 0.2836 | 5.39E-05 | 0.8737  | 0.2001 |
| 11:43014018 | rs5791545   | I | R | 0.63 | 6.60E-05 | -0.7285 | 0.1702 | 7.65E-01 | 0.0760  | 0.2420 | 2.84E-02 | 0.4153  | 0.1847 |
| 11:43883464 | rs73540482  | T | C | 0.86 | 7.31E-01 | -0.0982 | 0.2860 | 3.18E-01 | 0.3846  | 0.4009 | 7.71E-05 | 1.0444  | 0.2451 |
| 11:43932336 | rs558823932 | R | I | 0.88 | 6.06E-01 | -0.1524 | 0.2957 | 5.12E-01 | 0.2545  | 0.4033 | 3.92E-05 | 1.1188  | 0.2509 |
| 11:43947348 | rs4755757   | C | G | 0.89 | 3.85E-01 | -0.2618 | 0.3012 | 5.20E-01 | 0.2523  | 0.4098 | 9.90E-05 | 1.0917  | 0.2607 |
| 11:45776525 | rs2467285   | C | T | 0.32 | 1.54E-02 | -0.5703 | 0.2297 | 8.98E-05 | 1.1463  | 0.2901 | 4.57E-01 | 0.1771  | 0.2368 |
| 11:45777813 | rs1001595   | G | A | 0.32 | 1.59E-02 | -0.5662 | 0.2293 | 8.33E-05 | 1.1490  | 0.2898 | 4.50E-01 | 0.1796  | 0.2361 |
| 11:48199897 | rs2047815   | C | T | 0.75 | 8.63E-01 | -0.0373 | 0.2160 | 9.46E-01 | 0.0196  | 0.2926 | 8.47E-05 | 0.7842  | 0.1853 |
| 11:48200265 | rs10838817  | A | G | 0.75 | 8.63E-01 | -0.0372 | 0.2160 | 9.47E-01 | 0.0194  | 0.2926 | 8.43E-05 | 0.7844  | 0.1852 |
| 11:48200532 | rs537958379 | I | R | 0.72 | 8.78E-01 | -0.0352 | 0.2299 | 8.47E-01 | 0.0586  | 0.3083 | 7.25E-05 | 0.8416  | 0.1967 |
| 11:48200586 | rs2202249   | T | C | 0.75 | 8.65E-01 | -0.0365 | 0.2158 | 9.47E-01 | 0.0191  | 0.2926 | 8.47E-05 | 0.7838  | 0.1851 |
| 11:48201283 | rs10838819  | T | A | 0.88 | 9.79E-01 | 0.0073  | 0.2704 | 4.52E-02 | 0.7330  | 0.3797 | 9.97E-05 | 0.9732  | 0.2325 |
| 11:48203313 | rs11039565  | T | C | 0.88 | 9.81E-01 | 0.0064  | 0.2664 | 4.42E-02 | 0.7239  | 0.3736 | 9.94E-05 | 0.9589  | 0.2291 |
| 11:48203373 | rs10838820  | C | A | 0.88 | 9.81E-01 | 0.0064  | 0.2664 | 4.42E-02 | 0.7241  | 0.3736 | 9.95E-05 | 0.9590  | 0.2291 |
| 11:48203852 | rs34332242  | R | D | 0.88 | 9.81E-01 | 0.0064  | 0.2664 | 4.42E-02 | 0.7239  | 0.3736 | 9.94E-05 | 0.9589  | 0.2291 |
| 11:48204922 | rs12785331  | A | G | 0.88 | 9.81E-01 | 0.0063  | 0.2665 | 4.41E-02 | 0.7247  | 0.3737 | 1.00E-04 | 0.9590  | 0.2292 |
| 11:48205775 | rs11039569  | C | T | 0.88 | 9.81E-01 | 0.0064  | 0.2664 | 4.42E-02 | 0.7241  | 0.3736 | 9.95E-05 | 0.9590  | 0.2291 |
| 11:48206806 | rs12786800  | A | G | 0.88 | 9.81E-01 | 0.0064  | 0.2664 | 4.42E-02 | 0.7239  | 0.3736 | 9.94E-05 | 0.9589  | 0.2291 |
| 11:48207039 | rs10838821  | T | C | 0.88 | 9.81E-01 | 0.0063  | 0.2665 | 4.41E-02 | 0.7247  | 0.3737 | 1.00E-04 | 0.9590  | 0.2292 |
| 11:48207511 | rs11039572  | A | G | 0.88 | 9.81E-01 | 0.0062  | 0.2665 | 4.40E-02 | 0.7250  | 0.3737 | 9.98E-05 | 0.9591  | 0.2292 |
| 11:48208016 | rs11604898  | G | A | 0.88 | 9.81E-01 | 0.0064  | 0.2664 | 4.42E-02 | 0.7239  | 0.3736 | 9.94E-05 | 0.9589  | 0.2291 |
| 11:48208428 | rs10838822  | T | C | 0.88 | 9.81E-01 | 0.0065  | 0.2664 | 4.42E-02 | 0.7241  | 0.3737 | 9.96E-05 | 0.9590  | 0.2291 |
| 11:48209085 | rs11039575  | A | T | 0.88 | 9.81E-01 | 0.0065  | 0.2664 | 4.42E-02 | 0.7241  | 0.3737 | 9.96E-05 | 0.9590  | 0.2291 |
| 11:48209187 | rs11039576  | T | C | 0.88 | 9.81E-01 | 0.0064  | 0.2664 | 4.42E-02 | 0.7239  | 0.3736 | 9.94E-05 | 0.9589  | 0.2291 |
| 11:48209471 | rs7479011   | T | C | 0.75 | 8.83E-01 | -0.0316 | 0.2160 | 9.61E-01 | 0.0141  | 0.2931 | 8.42E-05 | 0.7846  | 0.1853 |
| 11:48209867 | rs147007333 | A | G | 0.75 | 8.86E-01 | -0.0311 | 0.2161 | 9.62E-01 | 0.0138  | 0.2932 | 8.44E-05 | 0.7847  | 0.1853 |
| 11:48210437 | rs11530176  | G | A | 0.88 | 9.81E-01 | 0.0065  | 0.2664 | 4.42E-02 | 0.7241  | 0.3737 | 9.96E-05 | 0.9590  | 0.2291 |
| 11:48211600 | rs12798054  | T | C | 0.88 | 9.81E-01 | 0.0065  | 0.2664 | 4.42E-02 | 0.7241  | 0.3737 | 9.96E-05 | 0.9590  | 0.2291 |
| 11:48211658 | rs12796400  | A | G | 0.88 | 9.81E-01 | 0.0064  | 0.2664 | 4.42E-02 | 0.7239  | 0.3736 | 9.94E-05 | 0.9589  | 0.2291 |
| 11:48211823 | rs12577527  | C | T | 0.88 | 9.81E-01 | 0.0064  | 0.2664 | 4.42E-02 | 0.7239  | 0.3736 | 9.94E-05 | 0.9589  | 0.2291 |

|             |             |   |   |      |          |         |        |          |         |        |          |         |        |
|-------------|-------------|---|---|------|----------|---------|--------|----------|---------|--------|----------|---------|--------|
| 11:48212348 | rs12803097  | G | A | 0.88 | 9.81E-01 | 0.0064  | 0.2664 | 4.42E-02 | 0.7241  | 0.3736 | 9.95E-05 | 0.9590  | 0.2291 |
| 11:48212687 | rs12803854  | G | A | 0.88 | 9.81E-01 | 0.0064  | 0.2664 | 4.42E-02 | 0.7241  | 0.3736 | 9.95E-05 | 0.9590  | 0.2291 |
| 11:48212951 | rs12577851  | C | T | 0.88 | 9.81E-01 | 0.0064  | 0.2664 | 4.42E-02 | 0.7239  | 0.3736 | 9.94E-05 | 0.9589  | 0.2291 |
| 11:48213002 | rs12577881  | G | C | 0.88 | 9.81E-01 | 0.0065  | 0.2667 | 4.43E-02 | 0.7248  | 0.3741 | 9.96E-05 | 0.9600  | 0.2294 |
| 11:48213013 | rs12575738  | A | G | 0.88 | 9.80E-01 | 0.0066  | 0.2665 | 4.42E-02 | 0.7241  | 0.3738 | 9.97E-05 | 0.9590  | 0.2292 |
| 11:48213377 | rs12785433  | A | C | 0.88 | 9.81E-01 | 0.0064  | 0.2664 | 4.42E-02 | 0.7239  | 0.3736 | 9.94E-05 | 0.9589  | 0.2291 |
| 11:48213446 | rs10769322  | T | C | 0.76 | 9.00E-01 | -0.0271 | 0.2163 | 9.70E-01 | 0.0109  | 0.2937 | 8.55E-05 | 0.7849  | 0.1855 |
| 11:48213453 | rs10769323  | T | C | 0.76 | 9.00E-01 | -0.0271 | 0.2163 | 9.70E-01 | 0.0109  | 0.2937 | 8.55E-05 | 0.7849  | 0.1855 |
| 11:48213515 | rs10769324  | C | A | 0.76 | 9.00E-01 | -0.0271 | 0.2163 | 9.70E-01 | 0.0109  | 0.2937 | 8.55E-05 | 0.7849  | 0.1855 |
| 11:48213833 | rs12573908  | C | A | 0.88 | 9.81E-01 | 0.0065  | 0.2664 | 4.42E-02 | 0.7239  | 0.3736 | 9.94E-05 | 0.9590  | 0.2291 |
| 11:48216749 | rs2870084   | T | C | 0.88 | 9.80E-01 | 0.0066  | 0.2665 | 4.42E-02 | 0.7243  | 0.3737 | 9.97E-05 | 0.9591  | 0.2292 |
| 11:48216916 | rs34711362  | T | C | 0.88 | 9.80E-01 | 0.0066  | 0.2665 | 4.42E-02 | 0.7243  | 0.3737 | 9.97E-05 | 0.9591  | 0.2292 |
| 11:48218668 | rs10838825  | A | G | 0.88 | 9.81E-01 | 0.0062  | 0.2666 | 4.40E-02 | 0.7254  | 0.3739 | 9.91E-05 | 0.9597  | 0.2292 |
| 11:48219490 | rs11602571  | T | C | 0.88 | 9.81E-01 | 0.0064  | 0.2666 | 4.40E-02 | 0.7253  | 0.3739 | 9.98E-05 | 0.9595  | 0.2293 |
| 11:48219812 | rs10838826  | T | G | 0.75 | 8.97E-01 | -0.0279 | 0.2165 | 9.72E-01 | 0.0103  | 0.2939 | 8.22E-05 | 0.7874  | 0.1856 |
| 11:48220989 | rs201959245 | C | T | 0.75 | 8.78E-01 | -0.0327 | 0.2140 | 9.75E-01 | 0.0089  | 0.2898 | 6.25E-05 | 0.7893  | 0.1826 |
| 11:48221095 | rs145952381 | I | R | 0.69 | 7.08E-01 | -0.0818 | 0.2182 | 9.66E-01 | 0.0130  | 0.3127 | 7.27E-05 | 0.7997  | 0.1869 |
| 11:48223283 | rs1847261   | T | G | 0.75 | 8.79E-01 | -0.0325 | 0.2137 | 9.75E-01 | 0.0091  | 0.2895 | 6.25E-05 | 0.7884  | 0.1824 |
| 11:48224060 | rs4752810   | T | A | 0.75 | 8.79E-01 | -0.0326 | 0.2136 | 9.75E-01 | 0.0088  | 0.2894 | 6.25E-05 | 0.7881  | 0.1823 |
| 11:48225680 | rs7940877   | G | A | 0.75 | 8.77E-01 | -0.0329 | 0.2134 | 9.75E-01 | 0.0089  | 0.2891 | 6.17E-05 | 0.7879  | 0.1821 |
| 11:48225839 | rs7941311   | A | G | 0.75 | 8.77E-01 | -0.0330 | 0.2134 | 9.75E-01 | 0.0090  | 0.2890 | 6.16E-05 | 0.7879  | 0.1821 |
| 11:48228788 | rs4752916   | G | A | 0.75 | 8.77E-01 | -0.0330 | 0.2132 | 9.76E-01 | 0.0087  | 0.2887 | 6.12E-05 | 0.7875  | 0.1819 |
| 11:48232547 | rs1354295   | T | A | 0.75 | 9.00E-01 | -0.0269 | 0.2138 | 9.72E-01 | 0.0102  | 0.2892 | 5.76E-05 | 0.7922  | 0.1822 |
| 11:48232548 | rs1354294   | A | C | 0.75 | 8.77E-01 | -0.0328 | 0.2130 | 9.81E-01 | 0.0066  | 0.2883 | 6.04E-05 | 0.7873  | 0.1817 |
| 11:48232853 | rs1393794   | C | T | 0.75 | 8.77E-01 | -0.0328 | 0.2129 | 9.80E-01 | 0.0072  | 0.2881 | 6.02E-05 | 0.7870  | 0.1816 |
| 11:48234813 | rs11606200  | C | G | 0.88 | 9.80E-01 | 0.0067  | 0.2665 | 4.42E-02 | 0.7245  | 0.3738 | 9.98E-05 | 0.9591  | 0.2292 |
| 11:48236553 | rs3923871   | G | A | 0.88 | 9.81E-01 | 0.0065  | 0.2664 | 4.42E-02 | 0.7239  | 0.3736 | 9.94E-05 | 0.9589  | 0.2291 |
| 11:48236725 | rs11039590  | C | A | 0.88 | 9.81E-01 | 0.0064  | 0.2664 | 4.42E-02 | 0.7239  | 0.3736 | 9.94E-05 | 0.9589  | 0.2291 |
| 11:48237742 | rs2102200   | G | T | 0.88 | 9.84E-01 | 0.0055  | 0.2671 | 4.58E-02 | 0.7211  | 0.3745 | 9.20E-05 | 0.9654  | 0.2294 |
| 11:48238019 | rs1875697   | C | T | 0.88 | 9.81E-01 | 0.0065  | 0.2665 | 4.42E-02 | 0.7243  | 0.3737 | 9.96E-05 | 0.9590  | 0.2291 |
| 11:48238549 | rs11606506  | G | A | 0.88 | 9.81E-01 | 0.0064  | 0.2664 | 4.42E-02 | 0.7239  | 0.3736 | 9.94E-05 | 0.9589  | 0.2291 |
| 11:48239182 | rs7130086   | A | C | 0.19 | 9.45E-01 | -0.0170 | 0.2470 | 3.38E-01 | -0.2901 | 0.3063 | 1.59E-04 | -0.8660 | 0.2140 |
| 11:48239908 | rs74750395  | G | T | 0.88 | 9.79E-01 | 0.0071  | 0.2665 | 4.46E-02 | 0.7225  | 0.3735 | 9.97E-05 | 0.9592  | 0.2292 |
| 11:48248536 | rs12221987  | C | T | 0.88 | 9.71E-01 | 0.0097  | 0.2642 | 5.09E-02 | 0.6927  | 0.3674 | 9.06E-05 | 0.9557  | 0.2268 |

|             |             |   |   |      |          |         |        |          |         |        |          |        |        |
|-------------|-------------|---|---|------|----------|---------|--------|----------|---------|--------|----------|--------|--------|
| 11:48250675 | rs7127946   | T | C | 0.74 | 8.26E-01 | -0.0441 | 0.2006 | 8.63E-01 | -0.0474 | 0.2791 | 8.42E-05 | 0.7290 | 0.1721 |
| 11:48251678 | rs12792956  | A | C | 0.88 | 9.77E-01 | 0.0077  | 0.2669 | 4.54E-02 | 0.7210  | 0.3740 | 9.99E-05 | 0.9605 | 0.2295 |
| 11:48252957 | rs185685972 | A | G | 0.88 | 9.76E-01 | 0.0080  | 0.2670 | 4.55E-02 | 0.7209  | 0.3741 | 1.00E-04 | 0.9608 | 0.2296 |
| 11:48254966 | rs11529375  | T | C | 0.88 | 9.76E-01 | 0.0079  | 0.2669 | 4.57E-02 | 0.7196  | 0.3739 | 9.99E-05 | 0.9605 | 0.2295 |
| 11:48254967 | rs11530183  | G | A | 0.88 | 9.76E-01 | 0.0079  | 0.2669 | 4.57E-02 | 0.7196  | 0.3739 | 9.99E-05 | 0.9605 | 0.2295 |
| 11:48259613 | rs10838842  | A | C | 0.88 | 9.76E-01 | 0.0080  | 0.2669 | 4.62E-02 | 0.7180  | 0.3737 | 9.98E-05 | 0.9605 | 0.2295 |
| 11:48260741 | rs11039605  | A | C | 0.88 | 9.76E-01 | 0.0081  | 0.2669 | 4.63E-02 | 0.7176  | 0.3737 | 1.00E-04 | 0.9605 | 0.2296 |
| 11:48260817 | rs11039606  | T | C | 0.88 | 9.76E-01 | 0.0081  | 0.2669 | 4.63E-02 | 0.7176  | 0.3737 | 1.00E-04 | 0.9605 | 0.2296 |
| 11:48261751 | rs12802708  | T | C | 0.88 | 9.76E-01 | 0.0081  | 0.2669 | 4.63E-02 | 0.7176  | 0.3737 | 1.00E-04 | 0.9605 | 0.2296 |
| 11:48262328 | rs2134555   | A | G | 0.75 | 8.93E-01 | -0.0280 | 0.2087 | 9.81E-01 | -0.0066 | 0.2806 | 5.30E-05 | 0.7764 | 0.1776 |
| 11:48263354 | rs11039609  | G | C | 0.88 | 9.76E-01 | 0.0082  | 0.2669 | 4.64E-02 | 0.7170  | 0.3737 | 9.99E-05 | 0.9605 | 0.2295 |
| 11:48278054 | rs877719    | A | T | 0.88 | 9.73E-01 | 0.0090  | 0.2667 | 4.78E-02 | 0.7112  | 0.3728 | 9.96E-05 | 0.9598 | 0.2293 |
| 11:48284033 | rs1109906   | T | C | 0.75 | 8.95E-01 | -0.0271 | 0.2065 | 9.82E-01 | -0.0061 | 0.2770 | 5.02E-05 | 0.7704 | 0.1756 |
| 11:48289368 | rs11437042  | I | R | 0.88 | 9.78E-01 | 0.0074  | 0.2664 | 4.48E-02 | 0.7217  | 0.3734 | 9.87E-05 | 0.9593 | 0.2291 |
| 11:48292169 | rs140845962 | I | R | 0.88 | 9.79E-01 | 0.0069  | 0.2664 | 4.51E-02 | 0.7209  | 0.3733 | 9.85E-05 | 0.9593 | 0.2290 |
| 11:48292172 | rs202093789 | I | R | 0.88 | 9.79E-01 | 0.0069  | 0.2664 | 4.51E-02 | 0.7209  | 0.3733 | 9.85E-05 | 0.9593 | 0.2290 |
| 11:48292258 | rs7479943   | A | T | 0.88 | 9.78E-01 | 0.0072  | 0.2664 | 4.48E-02 | 0.7218  | 0.3734 | 9.88E-05 | 0.9593 | 0.2291 |
| 11:48298269 | rs4980430   | A | G | 0.75 | 8.84E-01 | -0.0302 | 0.2074 | 9.79E-01 | -0.0073 | 0.2775 | 4.49E-05 | 0.7781 | 0.1760 |
| 11:48303781 | rs11530186  | G | C | 0.88 | 9.77E-01 | 0.0078  | 0.2669 | 4.38E-02 | 0.7279  | 0.3751 | 9.94E-05 | 0.9605 | 0.2295 |
| 11:48306990 | rs11039638  | T | G | 0.75 | 8.87E-01 | -0.0294 | 0.2076 | 9.81E-01 | -0.0066 | 0.2784 | 4.66E-05 | 0.7772 | 0.1763 |
| 11:48307020 | rs11039639  | C | T | 0.88 | 9.77E-01 | 0.0078  | 0.2670 | 4.35E-02 | 0.7299  | 0.3756 | 9.97E-05 | 0.9610 | 0.2296 |
| 11:48317706 | rs7113825   | C | T | 0.85 | 9.28E-01 | -0.0241 | 0.2687 | 4.32E-01 | 0.2622  | 0.3399 | 9.19E-05 | 0.9712 | 0.2307 |
| 11:48327476 | rs12288484  | G | T | 0.75 | 8.97E-01 | -0.0267 | 0.2073 | 9.89E-01 | -0.0040 | 0.2807 | 5.35E-05 | 0.7709 | 0.1765 |
| 11:48328644 | rs753095    | C | T | 0.75 | 8.97E-01 | -0.0268 | 0.2071 | 9.87E-01 | -0.0044 | 0.2801 | 5.29E-05 | 0.7703 | 0.1762 |
| 11:48347867 | rs11039679  | A | G | 0.88 | 9.80E-01 | 0.0066  | 0.2664 | 4.42E-02 | 0.7238  | 0.3735 | 9.96E-05 | 0.9587 | 0.2291 |
| 11:48349903 | rs11039681  | G | A | 0.88 | 9.80E-01 | 0.0067  | 0.2666 | 4.43E-02 | 0.7240  | 0.3738 | 9.95E-05 | 0.9595 | 0.2292 |
| 11:48350928 | rs34995021  | C | G | 0.88 | 9.81E-01 | 0.0064  | 0.2664 | 4.42E-02 | 0.7239  | 0.3736 | 9.94E-05 | 0.9589 | 0.2291 |
| 11:48351216 | rs11039682  | T | C | 0.88 | 9.81E-01 | 0.0065  | 0.2664 | 4.43E-02 | 0.7236  | 0.3735 | 9.94E-05 | 0.9589 | 0.2291 |
| 11:48351483 | rs146463725 | R | D | 0.88 | 9.81E-01 | 0.0065  | 0.2664 | 4.43E-02 | 0.7237  | 0.3735 | 9.93E-05 | 0.9589 | 0.2291 |
| 11:48352204 | rs1483116   | C | T | 0.75 | 8.94E-01 | -0.0274 | 0.2066 | 9.82E-01 | -0.0062 | 0.2772 | 4.99E-05 | 0.7709 | 0.1757 |
| 11:48360648 | rs11039685  | G | A | 0.88 | 9.80E-01 | 0.0066  | 0.2665 | 4.44E-02 | 0.7236  | 0.3736 | 9.94E-05 | 0.9592 | 0.2291 |
| 11:48365325 | rs11039688  | G | C | 0.88 | 9.80E-01 | 0.0066  | 0.2666 | 4.45E-02 | 0.7235  | 0.3737 | 9.94E-05 | 0.9596 | 0.2292 |
| 11:48371317 | rs74824994  | G | A | 0.88 | 1.00E+00 | -0.0001 | 0.2672 | 4.23E-02 | 0.7324  | 0.3749 | 9.32E-05 | 0.9651 | 0.2295 |
| 11:48371320 | rs75731910  | G | A | 0.88 | 9.79E-01 | 0.0070  | 0.2670 | 4.38E-02 | 0.7268  | 0.3745 | 9.95E-05 | 0.9609 | 0.2296 |

|             |             |   |   |      |          |         |        |          |         |        |          |         |        |
|-------------|-------------|---|---|------|----------|---------|--------|----------|---------|--------|----------|---------|--------|
| 11:48373407 | rs71477930  | G | A | 0.88 | 9.81E-01 | 0.0065  | 0.2667 | 4.46E-02 | 0.7233  | 0.3740 | 9.97E-05 | 0.9600  | 0.2294 |
| 11:48373946 | rs12797020  | C | A | 0.88 | 9.80E-01 | 0.0066  | 0.2667 | 4.47E-02 | 0.7232  | 0.3740 | 9.97E-05 | 0.9600  | 0.2294 |
| 11:48374173 | rs11039694  | G | T | 0.88 | 9.80E-01 | 0.0066  | 0.2668 | 4.47E-02 | 0.7233  | 0.3740 | 9.97E-05 | 0.9600  | 0.2294 |
| 11:48380203 | rs11039695  | A | C | 0.88 | 9.80E-01 | 0.0067  | 0.2668 | 4.46E-02 | 0.7235  | 0.3740 | 9.98E-05 | 0.9600  | 0.2294 |
| 11:48383465 | rs71477931  | C | T | 0.88 | 9.79E-01 | 0.0069  | 0.2667 | 4.46E-02 | 0.7235  | 0.3739 | 9.94E-05 | 0.9601  | 0.2294 |
| 11:48391949 | rs5791840   | R | D | 0.76 | 5.31E-01 | -0.1475 | 0.2356 | 1.91E-01 | 0.3929  | 0.2981 | 7.35E-05 | 0.8647  | 0.2023 |
| 11:48508864 | rs544306326 | I | R | 0.76 | 8.30E-01 | -0.0604 | 0.2811 | 1.37E-01 | 0.5506  | 0.3760 | 9.82E-05 | 1.0131  | 0.2418 |
| 11:48568330 | rs7482386   | G | A | 0.87 | 9.79E-01 | 0.0070  | 0.2679 | 6.01E-02 | 0.6715  | 0.3690 | 8.78E-05 | 0.9709  | 0.2299 |
| 11:48579092 | rs7937596   | T | C | 0.88 | 9.80E-01 | 0.0068  | 0.2678 | 4.61E-02 | 0.7207  | 0.3752 | 9.99E-05 | 0.9637  | 0.2303 |
| 11:48580210 | rs7105752   | C | T | 0.88 | 9.79E-01 | 0.0071  | 0.2674 | 4.60E-02 | 0.7201  | 0.3747 | 9.98E-05 | 0.9623  | 0.2299 |
| 11:48580821 | rs6485873   | C | T | 0.88 | 9.79E-01 | 0.0071  | 0.2674 | 4.60E-02 | 0.7201  | 0.3747 | 9.98E-05 | 0.9623  | 0.2299 |
| 11:48581482 | rs35552667  | D | R | 0.88 | 9.79E-01 | 0.0069  | 0.2674 | 4.58E-02 | 0.7207  | 0.3747 | 9.97E-05 | 0.9625  | 0.2300 |
| 11:48584029 | rs7479629   | T | C | 0.88 | 9.78E-01 | 0.0073  | 0.2677 | 4.57E-02 | 0.7219  | 0.3751 | 9.99E-05 | 0.9632  | 0.2302 |
| 11:48595854 | rs5791848   | D | R | 0.88 | 9.79E-01 | 0.0071  | 0.2681 | 4.60E-02 | 0.7234  | 0.3764 | 9.97E-05 | 0.9648  | 0.2305 |
| 11:48596547 | rs11039847  | C | G | 0.80 | 7.97E-01 | -0.0615 | 0.2399 | 4.77E-01 | 0.2309  | 0.3257 | 4.21E-05 | 0.9029  | 0.2034 |
| 11:48596818 | rs10742856  | C | T | 0.87 | 9.81E-01 | 0.0062  | 0.2678 | 4.67E-02 | 0.7176  | 0.3741 | 9.81E-05 | 0.9646  | 0.2302 |
| 11:48596955 | rs10742857  | T | C | 0.83 | 9.32E-01 | 0.0241  | 0.2824 | 3.94E-02 | 0.7728  | 0.3895 | 9.24E-05 | 1.0206  | 0.2426 |
| 11:48596959 | rs36176069  | T | C | 0.83 | 9.32E-01 | 0.0241  | 0.2824 | 3.94E-02 | 0.7728  | 0.3895 | 9.24E-05 | 1.0206  | 0.2426 |
| 11:48596962 | rs10742858  | T | C | 0.83 | 9.32E-01 | 0.0240  | 0.2824 | 3.93E-02 | 0.7729  | 0.3894 | 9.30E-05 | 1.0202  | 0.2426 |
| 11:48624725 | rs12421145  | C | A | 0.41 | 2.49E-01 | 0.2535  | 0.2191 | 6.78E-01 | -0.1262 | 0.3101 | 9.98E-05 | -0.7977 | 0.1906 |
| 11:48629092 | rs7481000   | T | A | 0.38 | 2.73E-01 | 0.2647  | 0.2405 | 4.72E-01 | -0.2378 | 0.3383 | 8.32E-05 | -0.8832 | 0.2084 |
| 11:49108070 | rs150946011 | D | R | 0.88 | 4.30E-01 | -0.2706 | 0.3427 | 2.03E-01 | 0.6036  | 0.4710 | 1.36E-05 | 1.3645  | 0.2866 |
| 11:60527294 | rs10897110  | T | C | 0.58 | 7.64E-05 | 0.7935  | 0.1873 | 1.11E-01 | -0.3828 | 0.2402 | 8.07E-01 | 0.0518  | 0.2114 |
| 11:69515696 | rs79825511  | G | A | 0.87 | 7.22E-02 | 0.6476  | 0.3558 | 7.59E-01 | -0.1350 | 0.4380 | 5.20E-06 | -1.5068 | 0.2995 |
| 11:69516025 | rs72475636  | C | T | 0.87 | 6.64E-02 | 0.6253  | 0.3363 | 1.93E-01 | -0.5122 | 0.3855 | 1.09E-05 | -1.3847 | 0.2870 |
| 11:69524103 | rs10752563  | A | G | 0.86 | 1.21E-01 | 0.5106  | 0.3265 | 2.44E-01 | -0.4466 | 0.3776 | 2.63E-05 | -1.2830 | 0.2805 |
| 11:69525868 | rs138542855 | C | T | 0.88 | 1.09E-01 | 0.5209  | 0.3221 | 2.56E-01 | -0.4300 | 0.3714 | 1.99E-05 | -1.2833 | 0.2758 |
| 11:69526015 | rs72475637  | T | C | 0.88 | 1.07E-01 | 0.5240  | 0.3220 | 2.54E-01 | -0.4311 | 0.3714 | 1.99E-05 | -1.2835 | 0.2758 |
| 11:69526788 | rs12419388  | A | G | 0.88 | 1.12E-01 | 0.5077  | 0.3163 | 2.71E-01 | -0.4097 | 0.3656 | 2.61E-05 | -1.2444 | 0.2720 |
| 11:69530290 | rs7114345   | G | A | 0.87 | 1.26E-01 | 0.4902  | 0.3174 | 3.24E-01 | -0.3678 | 0.3685 | 2.25E-05 | -1.2554 | 0.2718 |
| 11:69530390 | rs79079926  | C | A | 0.87 | 1.18E-01 | 0.4973  | 0.3152 | 2.95E-01 | -0.3885 | 0.3653 | 2.44E-05 | -1.2429 | 0.2705 |
| 11:69533873 | rs73526337  | C | G | 0.85 | 8.61E-02 | 0.5539  | 0.3192 | 3.96E-01 | -0.3232 | 0.3763 | 1.21E-05 | -1.3036 | 0.2719 |
| 11:69534411 | rs56656046  | C | A | 0.86 | 1.23E-01 | 0.4921  | 0.3165 | 3.86E-01 | -0.3251 | 0.3706 | 2.97E-05 | -1.2363 | 0.2724 |
| 11:69536350 | rs61666930  | G | C | 0.87 | 1.33E-01 | 0.4764  | 0.3146 | 3.98E-01 | -0.3157 | 0.3685 | 4.06E-05 | -1.2094 | 0.2719 |

|              |             |   |   |      |          |         |        |          |         |        |          |         |        |
|--------------|-------------|---|---|------|----------|---------|--------|----------|---------|--------|----------|---------|--------|
| 11:69537443  | rs60603533  | G | A | 0.86 | 1.34E-01 | 0.4743  | 0.3138 | 4.04E-01 | -0.3109 | 0.3678 | 4.16E-05 | -1.2048 | 0.2713 |
| 11:69538558  | rs72475638  | A | C | 0.87 | 1.36E-01 | 0.4708  | 0.3137 | 4.11E-01 | -0.3067 | 0.3679 | 4.45E-05 | -1.2003 | 0.2714 |
| 11:69538960  | rs74852454  | C | T | 0.86 | 1.37E-01 | 0.4696  | 0.3133 | 4.12E-01 | -0.3053 | 0.3675 | 4.41E-05 | -1.1990 | 0.2710 |
| 11:69540514  | rs59590661  | G | A | 0.86 | 1.41E-01 | 0.4634  | 0.3125 | 4.26E-01 | -0.2959 | 0.3670 | 4.88E-05 | -1.1897 | 0.2707 |
| 11:71956899  | rs677685    | G | C | 0.51 | 1.38E-01 | -0.3023 | 0.2023 | 5.39E-05 | 0.8188  | 0.2018 | 9.31E-01 | 0.0176  | 0.2028 |
| 11:71966582  | rs628542    | C | A | 0.54 | 1.61E-01 | -0.2684 | 0.1900 | 7.80E-05 | 0.7574  | 0.1913 | 7.23E-01 | -0.0676 | 0.1899 |
| 11:75968200  | rs11606029  | C | T | 0.84 | 7.91E-05 | -0.9580 | 0.2266 | 5.47E-04 | 1.3869  | 0.4305 | 2.86E-02 | 0.5506  | 0.2452 |
| 11:76043831  | rs11236718  | G | A | 0.79 | 9.91E-05 | -0.9464 | 0.2275 | 3.78E-02 | 0.6936  | 0.3437 | 4.20E-01 | 0.2065  | 0.2543 |
| 11:76048876  | rs2851473   | T | C | 0.79 | 9.05E-05 | -0.9463 | 0.2260 | 4.30E-02 | 0.6718  | 0.3420 | 4.27E-01 | 0.2027  | 0.2531 |
| 11:78356497  | rs12279681  | C | T | 0.35 | 6.62E-05 | 0.7491  | 0.1751 | 4.59E-01 | -0.1983 | 0.2691 | 5.08E-02 | -0.3824 | 0.1916 |
| 11:78356498  | rs1945465   | T | C | 0.35 | 6.60E-05 | 0.7494  | 0.1751 | 4.58E-01 | -0.1988 | 0.2692 | 5.10E-02 | -0.3821 | 0.1917 |
| 11:78357331  | rs11237577  | A | G | 0.35 | 6.45E-05 | 0.7489  | 0.1747 | 4.58E-01 | -0.1986 | 0.2687 | 5.14E-02 | -0.3807 | 0.1913 |
| 11:78357427  | rs11237578  | T | G | 0.35 | 6.43E-05 | 0.7489  | 0.1747 | 4.59E-01 | -0.1983 | 0.2687 | 5.15E-02 | -0.3805 | 0.1913 |
| 11:78358037  | rs2282650   | A | G | 0.35 | 5.69E-05 | 0.7518  | 0.1739 | 4.57E-01 | -0.1988 | 0.2683 | 5.07E-02 | -0.3809 | 0.1908 |
| 11:78358691  | rs3740826   | C | T | 0.35 | 5.67E-05 | 0.7517  | 0.1738 | 4.56E-01 | -0.1990 | 0.2681 | 5.09E-02 | -0.3804 | 0.1908 |
| 11:78358779  | rs3740827   | T | C | 0.66 | 9.64E-05 | -0.7318 | 0.1756 | 3.52E-01 | 0.2505  | 0.2714 | 6.78E-02 | 0.3570  | 0.1918 |
| 11:78359115  | rs12793480  | A | G | 0.35 | 5.83E-05 | 0.7513  | 0.1741 | 4.55E-01 | -0.1998 | 0.2684 | 5.24E-02 | -0.3784 | 0.1910 |
| 11:78377097  | rs34566831  | R | I | 0.39 | 5.41E-05 | 0.7790  | 0.1796 | 2.32E-01 | -0.3109 | 0.2632 | 8.59E-02 | -0.3474 | 0.1988 |
| 11:78388699  | rs55797205  | R | I | 0.36 | 6.41E-05 | 0.7650  | 0.1784 | 5.70E-01 | -0.1496 | 0.2633 | 4.11E-02 | -0.4070 | 0.1947 |
| 11:80647064  | rs1391534   | C | T | 0.44 | 9.92E-05 | -0.6366 | 0.1530 | 3.43E-01 | 0.2026  | 0.2118 | 9.28E-01 | 0.0155  | 0.1720 |
| 11:80648283  | rs35852879  | R | D | 0.48 | 8.62E-05 | -0.6862 | 0.1633 | 2.13E-01 | 0.2818  | 0.2249 | 8.35E-01 | 0.0386  | 0.1840 |
| 11:82009461  | rs10897952  | A | T | 0.47 | 6.73E-05 | 0.7284  | 0.1704 | 2.24E-01 | -0.3106 | 0.2546 | 6.95E-01 | -0.0759 | 0.1926 |
| 12:119326370 | rs4362197   | C | A | 0.88 | 1.02E-01 | -0.4878 | 0.2954 | 8.63E-05 | 1.9911  | 0.5950 | 2.69E-01 | 0.3287  | 0.2942 |
| 12:119332567 | rs7297419   | G | A | 0.89 | 4.69E-02 | -0.6056 | 0.3001 | 9.13E-05 | 2.0832  | 0.6365 | 2.04E-01 | 0.3873  | 0.3012 |
| 12:119333209 | rs149183744 | R | D | 0.89 | 5.13E-02 | -0.5963 | 0.3015 | 9.38E-05 | 2.0734  | 0.6338 | 1.87E-01 | 0.4030  | 0.3019 |
| 12:119335638 | rs10851051  | G | A | 0.89 | 4.17E-02 | -0.6201 | 0.2995 | 8.26E-05 | 2.1134  | 0.6458 | 1.98E-01 | 0.3922  | 0.3010 |
| 12:119338572 | rs7131867   | A | G | 0.89 | 3.90E-02 | -0.6275 | 0.2989 | 7.86E-05 | 2.1344  | 0.6544 | 1.88E-01 | 0.4008  | 0.3005 |
| 12:119340380 | rs34232964  | G | C | 0.89 | 3.76E-02 | -0.6309 | 0.2982 | 7.76E-05 | 2.1445  | 0.6599 | 1.82E-01 | 0.4050  | 0.2999 |
| 12:119380540 | rs7964215   | G | A | 0.92 | 1.53E-01 | -0.5656 | 0.3929 | 8.40E-05 | 4.4475  | 2.2944 | 4.25E-02 | 0.7873  | 0.3793 |
| 12:119382394 | rs4575336   | G | A | 0.93 | 1.11E-01 | -0.6850 | 0.4253 | 9.94E-05 | 4.5241  | 2.2475 | 5.04E-02 | 0.8266  | 0.4135 |
| 12:119383059 | rs1464949   | A | G | 0.93 | 1.09E-01 | -0.6873 | 0.4254 | 9.60E-05 | 4.5786  | 2.2881 | 5.03E-02 | 0.8271  | 0.4135 |
| 12:119383296 | rs143874569 | R | D | 0.93 | 1.08E-01 | -0.6922 | 0.4266 | 9.60E-05 | 4.6072  | 2.3067 | 4.99E-02 | 0.8310  | 0.4148 |
| 12:12225207  | rs10845469  | C | T | 0.59 | 6.55E-01 | -0.0824 | 0.1849 | 3.59E-01 | 0.2086  | 0.2271 | 8.90E-05 | 0.6708  | 0.1590 |
| 12:19573650  | rs10841227  | A | G | 0.40 | 5.27E-05 | 0.8564  | 0.1971 | 1.25E-01 | -0.4018 | 0.2659 | 1.12E-01 | -0.3534 | 0.2190 |

|             |             |   |   |      |          |         |        |          |            |          |          |         |        |
|-------------|-------------|---|---|------|----------|---------|--------|----------|------------|----------|----------|---------|--------|
| 12:19578994 | rs6486955   | T | C | 0.39 | 5.58E-05 | 0.8521  | 0.1968 | 1.30E-01 | -0.3959    | 0.2647   | 1.19E-01 | -0.3459 | 0.2187 |
| 12:19597097 | rs4963527   | T | A | 0.39 | 5.30E-05 | 0.8542  | 0.1967 | 1.44E-01 | -0.3835    | 0.2652   | 1.41E-01 | -0.3274 | 0.2192 |
| 12:19599034 | rs140386958 | R | I | 0.43 | 6.19E-05 | 0.8223  | 0.1913 | 1.10E-01 | -0.4148    | 0.2591   | 8.74E-02 | -0.3674 | 0.2113 |
| 12:19601137 | rs7309303   | T | G | 0.42 | 6.17E-05 | 0.8197  | 0.1906 | 1.14E-01 | -0.4097    | 0.2584   | 9.39E-02 | -0.3591 | 0.2108 |
| 12:19604687 | rs61912766  | G | A | 0.42 | 6.08E-05 | 0.8150  | 0.1894 | 1.19E-01 | -0.4018    | 0.2570   | 1.05E-01 | -0.3454 | 0.2097 |
| 12:19606213 | rs11044571  | A | T | 0.42 | 5.97E-05 | 0.8158  | 0.1893 | 1.16E-01 | -0.4057    | 0.2572   | 1.05E-01 | -0.3454 | 0.2098 |
| 12:19609503 | rs10734689  | A | G | 0.38 | 6.04E-05 | 0.8407  | 0.1953 | 1.55E-01 | -0.3692    | 0.2621   | 1.74E-01 | -0.3000 | 0.2178 |
| 12:19613820 | rs7973261   | T | C | 0.38 | 6.01E-05 | 0.8408  | 0.1952 | 1.56E-01 | -0.3688    | 0.2622   | 1.76E-01 | -0.2985 | 0.2178 |
| 12:19621227 | rs11044579  | C | G | 0.38 | 6.11E-05 | 0.8403  | 0.1953 | 1.56E-01 | -0.3687    | 0.2625   | 1.80E-01 | -0.2955 | 0.2179 |
| 12:19623533 | rs10743324  | C | T | 0.42 | 6.28E-05 | 0.8095  | 0.1885 | 1.21E-01 | -0.3991    | 0.2565   | 1.14E-01 | -0.3350 | 0.2089 |
| 12:19634497 | rs4963541   | T | C | 0.38 | 6.18E-05 | 0.8405  | 0.1955 | 1.58E-01 | -0.3678    | 0.2628   | 1.84E-01 | -0.2934 | 0.2181 |
| 12:19634580 | rs4963542   | A | T | 0.38 | 6.18E-05 | 0.8404  | 0.1955 | 1.58E-01 | -0.3678    | 0.2627   | 1.84E-01 | -0.2934 | 0.2181 |
| 12:19647476 | rs10770493  | G | C | 0.38 | 5.52E-05 | 0.8523  | 0.1967 | 1.54E-01 | -0.3744    | 0.2652   | 1.92E-01 | -0.2907 | 0.2201 |
| 12:19649096 | rs10770496  | T | C | 0.41 | 5.21E-05 | 0.8197  | 0.1885 | 1.22E-01 | -0.3995    | 0.2576   | 1.02E-01 | -0.3477 | 0.2092 |
| 12:20665611 | rs7305373   | A | G | 0.94 | 4.60E-01 | 0.3144  | 0.4253 | 2.19E-05 | 18762.3000 | 6.69E+06 | 6.72E-01 | -0.1787 | 0.4195 |
| 12:25055512 | rs3759085   | A | G | 0.66 | 5.39E-05 | 0.8179  | 0.1885 | 3.90E-02 | -0.4994    | 0.2307   | 9.50E-03 | -0.5416 | 0.2018 |
| 12:25056378 | rs3759086   | T | A | 0.57 | 9.33E-05 | 0.7188  | 0.1720 | 5.32E-02 | -0.4555    | 0.2305   | 2.59E-02 | -0.4238 | 0.1853 |
| 12:25057206 | rs3759087   | A | G | 0.55 | 6.04E-05 | 0.7174  | 0.1666 | 6.46E-02 | -0.4382    | 0.2328   | 5.74E-02 | -0.3549 | 0.1830 |
| 12:25058546 | rs4963818   | G | C | 0.67 | 9.65E-05 | 0.8026  | 0.1926 | 5.89E-02 | -0.4596    | 0.2318   | 1.46E-02 | -0.5178 | 0.2055 |
| 12:3353636  | rs7959621   | C | T | 0.66 | 4.18E-01 | -0.1632 | 0.2013 | 6.11E-01 | 0.1306     | 0.2611   | 7.40E-05 | 0.7403  | 0.1732 |
| 12:3357135  | rs660140    | G | C | 0.41 | 1.44E-01 | 0.2724  | 0.1849 | 3.06E-01 | -0.2452    | 0.2442   | 2.74E-05 | -0.7232 | 0.1586 |
| 12:3357785  | rs140604579 | R | D | 0.41 | 1.51E-01 | 0.2645  | 0.1830 | 3.33E-01 | -0.2286    | 0.2400   | 1.52E-05 | -0.7343 | 0.1553 |
| 12:3357806  | rs11418309  | R | I | 0.65 | 8.11E-02 | -0.3460 | 0.1961 | 5.92E-01 | 0.1341     | 0.2563   | 4.17E-05 | 0.7581  | 0.1707 |
| 12:3357992  | rs3782788   | T | G | 0.67 | 6.67E-02 | -0.3607 | 0.1942 | 7.06E-01 | 0.0972     | 0.2608   | 8.99E-06 | 0.8059  | 0.1652 |
| 12:40202563 | rs11173669  | C | T | 0.90 | 2.42E-01 | 0.4165  | 0.3544 | 1.49E-01 | -0.5402    | 0.3649   | 2.34E-05 | -1.3869 | 0.3011 |
| 12:42368632 | rs9739108   | C | T | 0.73 | 2.45E-02 | 0.4958  | 0.2160 | 1.98E-05 | -1.0466    | 0.2316   | 1.42E-01 | -0.3244 | 0.2179 |
| 12:53000987 | rs670142    | C | A | 0.71 | 2.61E-03 | -0.5792 | 0.1851 | 1.77E-01 | 0.3648     | 0.2766   | 2.13E-06 | 0.8528  | 0.1616 |
| 12:545890   | rs16930719  | C | T | 0.78 | 3.77E-02 | -0.4656 | 0.2203 | 9.68E-05 | 1.3055     | 0.3742   | 2.92E-01 | 0.2369  | 0.2228 |
| 12:58607312 | rs58467005  | R | D | 0.36 | 3.84E-01 | -0.1708 | 0.1958 | 3.27E-05 | 0.8130     | 0.1924   | 4.91E-01 | 0.1337  | 0.1930 |
| 12:58609457 | rs7970164   | T | C | 0.67 | 3.66E-01 | 0.1749  | 0.1933 | 3.58E-05 | -0.7955    | 0.1883   | 3.93E-01 | -0.1636 | 0.1902 |
| 12:58609685 | rs10877082  | G | A | 0.38 | 3.94E-01 | -0.1676 | 0.1963 | 3.41E-05 | 0.8647     | 0.2053   | 8.67E-01 | 0.0327  | 0.1942 |
| 12:58614449 | rs10783885  | T | C | 0.38 | 3.79E-01 | -0.1735 | 0.1969 | 2.51E-05 | 0.8896     | 0.2081   | 8.25E-01 | 0.0432  | 0.1949 |
| 12:58622382 | rs11172503  | G | A | 0.39 | 3.58E-01 | -0.1815 | 0.1971 | 1.60E-05 | 0.9284     | 0.2133   | 7.53E-01 | 0.0616  | 0.1951 |
| 12:58622987 | rs139205516 | A | G | 0.39 | 3.57E-01 | -0.1820 | 0.1971 | 1.57E-05 | 0.9297     | 0.2135   | 7.50E-01 | 0.0625  | 0.1951 |

|             |             |   |   |      |          |         |        |          |         |        |          |         |        |
|-------------|-------------|---|---|------|----------|---------|--------|----------|---------|--------|----------|---------|--------|
| 12:58626004 | rs10877083  | T | C | 0.39 | 3.50E-01 | -0.1844 | 0.1968 | 1.40E-05 | 0.9404  | 0.2152 | 7.25E-01 | 0.0690  | 0.1948 |
| 12:58638253 | rs12423429  | G | T | 0.80 | 5.64E-01 | -0.1459 | 0.2529 | 6.74E-05 | -1.2958 | 0.2940 | 3.61E-01 | -0.3873 | 0.4205 |
| 12:58640325 | rs1177777   | G | A | 0.39 | 3.50E-01 | -0.1860 | 0.1985 | 1.35E-05 | 0.9522  | 0.2177 | 7.18E-01 | 0.0713  | 0.1965 |
| 12:58640529 | rs1181377   | T | C | 0.39 | 3.62E-01 | -0.1817 | 0.1990 | 1.31E-05 | 0.9559  | 0.2183 | 7.24E-01 | 0.0699  | 0.1969 |
| 12:58738035 | rs1729795   | T | G | 0.48 | 1.06E-01 | -0.2850 | 0.1747 | 9.19E-05 | 0.8025  | 0.2084 | 9.07E-02 | 0.2949  | 0.1714 |
| 12:62861745 | rs10877853  | T | C | 0.62 | 4.68E-01 | -0.1310 | 0.1805 | 9.03E-05 | 0.8819  | 0.2391 | 7.54E-01 | 0.0561  | 0.1782 |
| 12:63614956 | rs11174871  | A | G | 0.71 | 1.25E-05 | -0.9161 | 0.1927 | 6.56E-02 | 0.5733  | 0.3177 | 9.27E-01 | 0.0207  | 0.2243 |
| 12:70445461 | rs149839455 | A | G | 0.93 | 8.77E-05 | 1.4710  | 0.3505 | 6.03E-02 | -0.7912 | 0.3986 | 6.92E-01 | -0.1568 | 0.3944 |
| 12:85814040 | rs559707085 | R | I | 0.95 | 6.95E-02 | 0.8547  | 0.4649 | 6.70E-01 | -0.2519 | 0.5769 | 7.30E-05 | -1.7515 | 0.4095 |
| 12:85834860 | rs7963815   | G | A | 0.95 | 8.25E-02 | 0.8018  | 0.4565 | 6.64E-01 | -0.2521 | 0.5669 | 3.76E-05 | -1.7732 | 0.3966 |
| 12:85873291 | rs60552633  | T | C | 0.95 | 1.28E-01 | 0.6781  | 0.4415 | 5.60E-01 | -0.3209 | 0.5328 | 7.29E-05 | -1.6491 | 0.3855 |
| 12:85873925 | rs55897040  | A | T | 0.95 | 1.28E-01 | 0.6779  | 0.4414 | 5.59E-01 | -0.3217 | 0.5326 | 7.26E-05 | -1.6491 | 0.3854 |
| 12:85877237 | rs59712244  | T | A | 0.95 | 1.26E-01 | 0.6840  | 0.4429 | 5.59E-01 | -0.3227 | 0.5345 | 7.19E-05 | -1.6558 | 0.3867 |
| 12:85878293 | rs112271310 | R | D | 0.95 | 1.26E-01 | 0.6839  | 0.4428 | 5.61E-01 | -0.3211 | 0.5347 | 7.19E-05 | -1.6557 | 0.3867 |
| 12:85883863 | rs11116842  | G | A | 0.95 | 1.26E-01 | 0.6823  | 0.4423 | 5.61E-01 | -0.3208 | 0.5341 | 7.20E-05 | -1.6537 | 0.3862 |
| 12:85884507 | rs11116843  | C | T | 0.95 | 1.26E-01 | 0.6818  | 0.4423 | 5.61E-01 | -0.3206 | 0.5341 | 7.21E-05 | -1.6533 | 0.3862 |
| 12:85884858 | rs11116844  | C | A | 0.95 | 1.27E-01 | 0.6812  | 0.4422 | 5.61E-01 | -0.3205 | 0.5340 | 7.19E-05 | -1.6531 | 0.3861 |
| 12:85885635 | rs74813881  | A | T | 0.95 | 1.27E-01 | 0.6805  | 0.4420 | 5.61E-01 | -0.3201 | 0.5337 | 7.17E-05 | -1.6525 | 0.3859 |
| 12:85887583 | rs79996161  | A | G | 0.95 | 1.31E-01 | 0.6705  | 0.4400 | 5.60E-01 | -0.3197 | 0.5309 | 7.31E-05 | -1.6428 | 0.3841 |
| 12:85889505 | rs111601198 | R | D | 0.95 | 1.28E-01 | 0.6783  | 0.4416 | 5.61E-01 | -0.3204 | 0.5332 | 7.21E-05 | -1.6506 | 0.3856 |
| 12:85893589 | rs74112063  | A | G | 0.95 | 1.32E-01 | 0.6661  | 0.4392 | 5.59E-01 | -0.3196 | 0.5297 | 7.36E-05 | -1.6388 | 0.3834 |
| 12:85895211 | rs12229603  | T | C | 0.95 | 1.29E-01 | 0.6743  | 0.4408 | 5.59E-01 | -0.3214 | 0.5318 | 7.22E-05 | -1.6472 | 0.3848 |
| 12:85895595 | rs11116848  | G | A | 0.95 | 1.28E-01 | 0.6767  | 0.4409 | 5.63E-01 | -0.3181 | 0.5325 | 7.30E-05 | -1.6467 | 0.3850 |
| 12:85899173 | rs57279875  | C | T | 0.95 | 1.28E-01 | 0.6757  | 0.4408 | 5.63E-01 | -0.3178 | 0.5323 | 7.33E-05 | -1.6458 | 0.3849 |
| 12:85907827 | rs74112083  | C | G | 0.94 | 8.73E-02 | 0.7037  | 0.4071 | 1.19E-01 | -0.6683 | 0.3998 | 9.60E-05 | -1.5065 | 0.3590 |
| 12:85908231 | rs11116852  | A | T | 0.95 | 1.35E-01 | 0.6586  | 0.4375 | 5.59E-01 | -0.3189 | 0.5276 | 7.42E-05 | -1.6315 | 0.3819 |
| 12:85909987 | rs74112086  | G | T | 0.95 | 1.32E-01 | 0.6667  | 0.4392 | 5.60E-01 | -0.3191 | 0.5300 | 7.32E-05 | -1.6394 | 0.3834 |
| 12:85912432 | rs7961629   | G | A | 0.95 | 1.32E-01 | 0.6671  | 0.4392 | 5.60E-01 | -0.3191 | 0.5301 | 7.44E-05 | -1.6382 | 0.3835 |
| 12:85912600 | rs57059247  | G | A | 0.95 | 1.32E-01 | 0.6662  | 0.4391 | 5.60E-01 | -0.3193 | 0.5298 | 7.24E-05 | -1.6401 | 0.3832 |
| 12:89237659 | rs7303698   | C | A | 0.89 | 7.88E-05 | 1.2398  | 0.2932 | 2.40E-01 | -0.4151 | 0.3480 | 7.78E-01 | -0.0935 | 0.3308 |
| 12:93758149 | rs67475674  | R | D | 0.71 | 6.16E-02 | -0.4973 | 0.2625 | 2.25E-01 | 0.4192  | 0.3507 | 6.42E-05 | 0.9974  | 0.2311 |
| 12:96549543 | rs256200    | G | A | 0.72 | 1.87E-05 | 0.8386  | 0.1807 | 6.69E-01 | -0.1115 | 0.2592 | 2.27E-02 | -0.4674 | 0.1996 |
| 12:96549634 | rs256199    | T | C | 0.72 | 1.78E-05 | 0.8356  | 0.1795 | 6.61E-01 | -0.1137 | 0.2579 | 2.28E-02 | -0.4642 | 0.1984 |
| 12:96552711 | rs256198    | A | T | 0.71 | 1.57E-05 | 0.8659  | 0.1846 | 7.85E-01 | -0.0737 | 0.2686 | 3.08E-02 | -0.4550 | 0.2054 |

|              |             |   |   |      |          |         |        |          |         |        |          |         |        |
|--------------|-------------|---|---|------|----------|---------|--------|----------|---------|--------|----------|---------|--------|
| 13:102477248 | rs3007763   | A | G | 0.73 | 7.40E-05 | -0.8521 | 0.2007 | 3.28E-02 | 0.6267  | 0.2845 | 6.07E-01 | 0.1170  | 0.2262 |
| 13:108033035 | rs9559031   | C | T | 0.89 | 2.08E-01 | 0.5544  | 0.4376 | 3.62E-01 | -0.4742 | 0.5187 | 8.07E-05 | -1.6154 | 0.3803 |
| 13:111217422 | rs766974    | G | A | 0.68 | 2.97E-01 | -0.2103 | 0.2012 | 7.20E-05 | 1.0911  | 0.2917 | 2.16E-01 | 0.2464  | 0.1970 |
| 13:20812200  | rs71198966  | R | I | 0.39 | 7.93E-05 | 0.8448  | 0.1999 | 4.97E-01 | -0.2129 | 0.3188 | 7.29E-01 | -0.0784 | 0.2254 |
| 13:29364808  | rs78353449  | G | A | 0.94 | 2.80E-05 | -1.6166 | 0.3571 | 6.32E-02 | 1.5718  | 1.0604 | 5.59E-02 | 0.7751  | 0.3971 |
| 13:30310959  | rs7327855   | G | T | 0.63 | 4.06E-05 | 0.7953  | 0.1799 | 2.45E-03 | -0.8022 | 0.2683 | 8.97E-03 | -0.5231 | 0.1933 |
| 13:35209765  | rs79529743  | C | G | 0.92 | 3.10E-01 | 0.3352  | 0.3295 | 4.49E-05 | -1.0611 | 0.2232 | 5.46E-01 | -0.1978 | 0.3259 |
| 13:57555759  | rs9537525   | A | T | 0.46 | 1.93E-02 | 0.5009  | 0.2094 | 2.08E-02 | -0.6401 | 0.2827 | 7.32E-05 | -0.8043 | 0.1881 |
| 13:57556412  | rs9537526   | C | T | 0.46 | 2.12E-02 | 0.4987  | 0.2118 | 2.35E-02 | -0.6307 | 0.2842 | 7.86E-05 | -0.8091 | 0.1901 |
| 13:57556464  | rs9527566   | G | A | 0.46 | 2.12E-02 | 0.4987  | 0.2118 | 2.35E-02 | -0.6309 | 0.2842 | 7.88E-05 | -0.8090 | 0.1901 |
| 13:57556511  | rs7490316   | A | G | 0.46 | 2.12E-02 | 0.4986  | 0.2118 | 2.35E-02 | -0.6309 | 0.2842 | 7.88E-05 | -0.8090 | 0.1901 |
| 13:57556765  | rs6561905   | C | T | 0.46 | 2.15E-02 | 0.4973  | 0.2117 | 2.36E-02 | -0.6300 | 0.2841 | 7.85E-05 | -0.8085 | 0.1900 |
| 13:57566485  | rs9316881   | G | A | 0.46 | 1.92E-02 | 0.5007  | 0.2091 | 2.08E-02 | -0.6393 | 0.2824 | 7.30E-05 | -0.8032 | 0.1878 |
| 13:57567539  | rs9537541   | G | A | 0.46 | 1.92E-02 | 0.5007  | 0.2091 | 2.08E-02 | -0.6394 | 0.2824 | 7.32E-05 | -0.8031 | 0.1878 |
| 13:57570035  | rs148081853 | R | I | 0.46 | 1.92E-02 | 0.5008  | 0.2091 | 2.08E-02 | -0.6396 | 0.2824 | 7.33E-05 | -0.8032 | 0.1878 |
| 13:57570394  | rs201113483 | R | D | 0.46 | 1.93E-02 | 0.5007  | 0.2092 | 2.08E-02 | -0.6396 | 0.2824 | 7.34E-05 | -0.8033 | 0.1879 |
| 13:57581787  | rs1591602   | G | A | 0.46 | 1.95E-02 | 0.5004  | 0.2095 | 2.06E-02 | -0.6407 | 0.2825 | 7.44E-05 | -0.8037 | 0.1881 |
| 13:57680484  | rs200767240 | R | I | 0.60 | 2.28E-02 | 0.4332  | 0.1863 | 1.97E-02 | -0.5030 | 0.2155 | 8.61E-05 | -0.7075 | 0.1673 |
| 13:57714724  | rs3967795   | C | T | 0.44 | 4.17E-03 | 0.6570  | 0.2215 | 5.72E-03 | -0.8303 | 0.3036 | 8.21E-05 | -0.8663 | 0.2042 |
| 13:57714737  | rs372036953 | A | G | 0.46 | 4.73E-03 | 0.6274  | 0.2147 | 1.44E-02 | -0.7004 | 0.2922 | 1.82E-05 | -0.9010 | 0.1926 |
| 13:57759469  | rs9591802   | C | T | 0.58 | 1.58E-02 | -0.4730 | 0.1913 | 1.04E-01 | 0.3747  | 0.2319 | 6.05E-05 | 0.7442  | 0.1718 |
| 13:57764148  | rs34077742  | I | R | 0.58 | 1.57E-02 | -0.4740 | 0.1915 | 1.04E-01 | 0.3755  | 0.2326 | 6.25E-05 | 0.7440  | 0.1721 |
| 13:58248124  | rs9597584   | C | A | 0.62 | 1.43E-01 | -0.2850 | 0.1929 | 2.52E-01 | 0.2592  | 0.2335 | 8.03E-05 | 0.7157  | 0.1684 |
| 13:58591940  | rs34941924  | I | R | 0.88 | 1.20E-01 | -0.5217 | 0.3330 | 1.04E-01 | 0.7318  | 0.4541 | 1.40E-05 | 1.3454  | 0.2830 |
| 13:65005844  | rs57721572  | R | D | 0.64 | 7.23E-05 | -0.8287 | 0.1948 | 1.53E-01 | 0.3952  | 0.2780 | 5.35E-01 | 0.1371  | 0.2195 |
| 13:71301595  | rs78215204  | A | G | 0.93 | 1.54E-01 | 0.6648  | 0.4626 | 1.69E-01 | -0.7129 | 0.5061 | 5.32E-05 | -1.7517 | 0.4008 |
| 13:81146008  | rs6563177   | G | A | 0.68 | 7.33E-01 | 0.0683  | 0.2005 | 8.88E-01 | -0.0345 | 0.2418 | 7.36E-05 | -0.7340 | 0.1717 |
| 13:81193993  | rs3813531   | G | C | 0.44 | 2.91E-01 | -0.1924 | 0.1817 | 4.20E-01 | 0.1862  | 0.2322 | 2.18E-05 | 0.7118  | 0.1538 |
| 13:81194762  | rs35982872  | R | I | 0.71 | 3.61E-01 | -0.2153 | 0.2355 | 5.43E-02 | 0.5804  | 0.3079 | 8.33E-05 | 0.8619  | 0.2034 |
| 13:81229110  | rs9574710   | C | T | 0.86 | 5.46E-01 | -0.1625 | 0.2689 | 5.06E-01 | 0.2040  | 0.3097 | 5.83E-05 | -0.9987 | 0.2299 |
| 13:81243274  | rs34835254  | R | I | 0.48 | 8.40E-01 | -0.0366 | 0.1813 | 6.09E-01 | 0.1175  | 0.2288 | 5.75E-05 | 0.6718  | 0.1545 |
| 13:81245032  | rs1176286   | T | A | 0.49 | 8.03E-01 | -0.0447 | 0.1800 | 6.33E-01 | 0.1096  | 0.2287 | 5.77E-05 | 0.6669  | 0.1534 |
| 13:81246353  | rs1094508   | A | C | 0.48 | 8.41E-01 | -0.0362 | 0.1806 | 6.09E-01 | 0.1175  | 0.2283 | 5.48E-05 | 0.6710  | 0.1538 |
| 13:81260479  | rs822176    | C | T | 0.48 | 8.57E-01 | -0.0322 | 0.1792 | 5.95E-01 | 0.1212  | 0.2264 | 4.97E-05 | 0.6689  | 0.1524 |

|              |             |   |   |      |          |         |        |          |         |        |          |         |        |
|--------------|-------------|---|---|------|----------|---------|--------|----------|---------|--------|----------|---------|--------|
| 13:81260808  | rs1744600   | G | C | 0.48 | 8.59E-01 | -0.0318 | 0.1793 | 5.95E-01 | 0.1210  | 0.2265 | 5.03E-05 | 0.6689  | 0.1525 |
| 13:81261472  | rs822177    | T | C | 0.48 | 8.60E-01 | -0.0316 | 0.1794 | 5.96E-01 | 0.1207  | 0.2266 | 5.05E-05 | 0.6690  | 0.1526 |
| 13:81263321  | rs1094504   | G | A | 0.49 | 8.81E-01 | -0.0270 | 0.1806 | 6.11E-01 | 0.1167  | 0.2283 | 5.46E-05 | 0.6707  | 0.1537 |
| 13:81263389  | rs1094506   | C | T | 0.48 | 8.89E-01 | -0.0252 | 0.1807 | 6.10E-01 | 0.1172  | 0.2284 | 5.56E-05 | 0.6706  | 0.1539 |
| 13:81263807  | rs1578494   | T | G | 0.48 | 8.75E-01 | -0.0282 | 0.1803 | 6.07E-01 | 0.1177  | 0.2279 | 5.54E-05 | 0.6694  | 0.1536 |
| 13:81264249  | rs1856994   | C | T | 0.49 | 8.85E-01 | -0.0261 | 0.1808 | 6.14E-01 | 0.1158  | 0.2286 | 5.61E-05 | 0.6707  | 0.1540 |
| 13:81264285  | rs1856993   | G | T | 0.49 | 8.85E-01 | -0.0260 | 0.1808 | 6.14E-01 | 0.1157  | 0.2287 | 5.62E-05 | 0.6707  | 0.1540 |
| 13:81264465  | rs2794222   | A | G | 0.49 | 8.86E-01 | -0.0258 | 0.1809 | 6.15E-01 | 0.1156  | 0.2287 | 5.65E-05 | 0.6706  | 0.1541 |
| 13:81264868  | rs138449603 | D | R | 0.49 | 8.87E-01 | -0.0257 | 0.1809 | 6.16E-01 | 0.1152  | 0.2289 | 5.68E-05 | 0.6708  | 0.1542 |
| 13:81264878  | rs61706737  | T | C | 0.49 | 8.87E-01 | -0.0256 | 0.1809 | 6.15E-01 | 0.1155  | 0.2288 | 5.68E-05 | 0.6707  | 0.1542 |
| 13:81265009  | rs2759229   | T | G | 0.49 | 8.88E-01 | -0.0255 | 0.1811 | 6.18E-01 | 0.1147  | 0.2289 | 5.57E-05 | 0.6720  | 0.1543 |
| 13:81265026  | rs2794223   | C | T | 0.49 | 8.88E-01 | -0.0255 | 0.1810 | 6.15E-01 | 0.1154  | 0.2289 | 5.70E-05 | 0.6707  | 0.1542 |
| 13:81265591  | rs2759228   | A | C | 0.49 | 8.88E-01 | -0.0253 | 0.1810 | 6.17E-01 | 0.1150  | 0.2290 | 5.73E-05 | 0.6708  | 0.1543 |
| 13:81267583  | rs113602029 | C | T | 0.49 | 8.96E-01 | -0.0238 | 0.1814 | 6.21E-01 | 0.1139  | 0.2295 | 5.99E-05 | 0.6707  | 0.1547 |
| 13:81267664  | rs113135326 | G | C | 0.49 | 8.96E-01 | -0.0237 | 0.1815 | 6.21E-01 | 0.1138  | 0.2296 | 6.00E-05 | 0.6709  | 0.1548 |
| 13:81269784  | rs2014392   | G | A | 0.49 | 8.93E-01 | -0.0244 | 0.1814 | 6.21E-01 | 0.1140  | 0.2295 | 6.24E-05 | 0.6692  | 0.1548 |
| 13:81273772  | rs2794226   | G | A | 0.49 | 9.13E-01 | -0.0199 | 0.1825 | 6.36E-01 | 0.1096  | 0.2310 | 7.18E-05 | 0.6683  | 0.1561 |
| 13:81274183  | rs2794228   | C | T | 0.49 | 9.14E-01 | -0.0197 | 0.1825 | 6.36E-01 | 0.1095  | 0.2311 | 7.23E-05 | 0.6683  | 0.1561 |
| 13:81275600  | rs34740532  | A | G | 0.49 | 9.20E-01 | -0.0184 | 0.1828 | 6.41E-01 | 0.1082  | 0.2315 | 7.53E-05 | 0.6679  | 0.1565 |
| 13:81276612  | rs9574724   | T | C | 0.49 | 9.21E-01 | -0.0181 | 0.1829 | 6.43E-01 | 0.1074  | 0.2317 | 7.72E-05 | 0.6675  | 0.1567 |
| 13:81277958  | rs9574725   | G | T | 0.49 | 9.27E-01 | -0.0166 | 0.1832 | 6.47E-01 | 0.1063  | 0.2321 | 8.02E-05 | 0.6671  | 0.1570 |
| 13:81278305  | rs35461826  | G | A | 0.49 | 9.30E-01 | -0.0162 | 0.1833 | 6.49E-01 | 0.1058  | 0.2322 | 8.13E-05 | 0.6669  | 0.1571 |
| 13:90875075  | rs10047731  | G | A | 0.75 | 8.38E-01 | 0.0688  | 0.3365 | 9.57E-02 | -0.6305 | 0.3762 | 4.67E-05 | -1.2599 | 0.2858 |
| 13:95842190  | rs78608794  | T | G | 0.88 | 7.34E-01 | -0.1005 | 0.2967 | 6.24E-01 | -0.1639 | 0.3292 | 4.61E-05 | -1.1123 | 0.2521 |
| 13:95843575  | rs9524822   | T | C | 0.88 | 7.51E-01 | -0.0940 | 0.2962 | 6.01E-01 | -0.1740 | 0.3280 | 3.96E-05 | -1.1187 | 0.2511 |
| 13:95852179  | rs9516533   | A | G | 0.88 | 8.22E-01 | -0.0644 | 0.2866 | 3.96E-01 | -0.2678 | 0.3131 | 3.94E-05 | -1.0819 | 0.2427 |
| 13:95860590  | rs114357938 | A | G | 0.88 | 5.65E-01 | -0.1679 | 0.2919 | 3.57E-01 | -0.2972 | 0.3193 | 5.96E-05 | -1.0825 | 0.2496 |
| 13:99090166  | rs59023150  | D | R | 0.91 | 6.28E-02 | 0.7946  | 0.4214 | 3.85E-05 | -1.5493 | 0.3448 | 1.92E-01 | -0.5554 | 0.4209 |
| 14:101528110 | rs6575812   | G | T | 0.79 | 8.12E-03 | -0.7342 | 0.2693 | 7.76E-05 | 1.4826  | 0.4313 | 9.15E-02 | 0.4716  | 0.2748 |
| 14:101528846 | rs11160619  | G | A | 0.79 | 8.46E-03 | -0.7333 | 0.2705 | 8.70E-05 | 1.4757  | 0.4319 | 8.84E-02 | 0.4780  | 0.2757 |
| 14:101533692 | rs72635181  | C | T | 0.85 | 6.56E-05 | -1.7904 | 0.4181 | 8.92E-03 | 1.7867  | 0.7189 | 4.73E-02 | 0.9271  | 0.4572 |
| 14:101632104 | rs34665795  | R | D | 0.69 | 7.66E-05 | -0.7291 | 0.1721 | 2.21E-01 | 0.2897  | 0.2440 | 1.32E-01 | 0.2911  | 0.1905 |
| 14:101634566 | rs35347011  | R | D | 0.69 | 6.11E-05 | -0.7531 | 0.1750 | 2.21E-01 | 0.2941  | 0.2474 | 1.28E-01 | 0.3003  | 0.1944 |
| 14:101634591 | rs12101230  | C | T | 0.69 | 7.65E-05 | -0.7288 | 0.1720 | 2.22E-01 | 0.2894  | 0.2439 | 1.32E-01 | 0.2911  | 0.1904 |

|              |             |   |   |      |          |         |        |          |          |          |          |         |        |
|--------------|-------------|---|---|------|----------|---------|--------|----------|----------|----------|----------|---------|--------|
| 14:104756318 | rs58528480  | C | T | 0.83 | 2.60E-01 | 0.2775  | 0.2455 | 8.54E-05 | -0.8556  | 0.2015   | 7.70E-01 | -0.0716 | 0.2439 |
| 14:21144799  | rs10498273  | C | G | 0.94 | 8.69E-02 | -0.7007 | 0.4048 | 3.32E-05 | 328.3990 | 242.8050 | 3.05E-02 | 0.8695  | 0.3919 |
| 14:26677588  | rs35838189  | C | T | 0.88 | 8.30E-02 | -0.5438 | 0.3101 | 7.54E-05 | 3.0650   | 1.1437   | 7.90E-01 | -0.0836 | 0.3130 |
| 14:28173377  | rs2154145   | G | T | 0.60 | 2.70E-01 | 0.2223  | 0.2010 | 6.62E-01 | 0.1067   | 0.2508   | 4.60E-05 | -0.7610 | 0.1725 |
| 14:41411051  | rs1176956   | C | T | 0.78 | 2.07E-01 | 0.2714  | 0.2138 | 4.58E-01 | -0.1765  | 0.2352   | 1.90E-05 | -0.8464 | 0.1814 |
| 14:41412218  | rs34510145  | I | R | 0.78 | 2.06E-01 | 0.2715  | 0.2138 | 4.58E-01 | -0.1765  | 0.2352   | 1.90E-05 | -0.8463 | 0.1814 |
| 14:41413100  | rs1176957   | T | C | 0.78 | 2.09E-01 | 0.2703  | 0.2139 | 4.60E-01 | -0.1757  | 0.2353   | 1.89E-05 | -0.8468 | 0.1814 |
| 14:41413712  | rs1182565   | T | C | 0.78 | 2.06E-01 | 0.2716  | 0.2138 | 4.58E-01 | -0.1764  | 0.2352   | 1.90E-05 | -0.8461 | 0.1813 |
| 14:41413845  | rs5808117   | D | R | 0.85 | 5.23E-01 | 0.1633  | 0.2557 | 4.99E-01 | -0.1901  | 0.2775   | 7.23E-05 | -0.9397 | 0.2195 |
| 14:41416288  | rs1176960   | T | C | 0.78 | 2.06E-01 | 0.2714  | 0.2137 | 4.58E-01 | -0.1763  | 0.2351   | 1.90E-05 | -0.8460 | 0.1813 |
| 14:41416699  | rs1176962   | C | A | 0.78 | 2.06E-01 | 0.2715  | 0.2137 | 4.58E-01 | -0.1762  | 0.2351   | 1.90E-05 | -0.8460 | 0.1813 |
| 14:41417718  | rs1176964   | C | T | 0.78 | 2.06E-01 | 0.2715  | 0.2137 | 4.58E-01 | -0.1762  | 0.2351   | 1.89E-05 | -0.8460 | 0.1813 |
| 14:41418113  | rs1615517   | G | C | 0.78 | 2.06E-01 | 0.2715  | 0.2137 | 4.58E-01 | -0.1762  | 0.2351   | 1.89E-05 | -0.8460 | 0.1812 |
| 14:41420230  | rs76226872  | G | A | 0.78 | 2.06E-01 | 0.2714  | 0.2137 | 4.58E-01 | -0.1761  | 0.2351   | 1.90E-05 | -0.8458 | 0.1812 |
| 14:41420865  | rs141064389 | T | C | 0.77 | 2.31E-01 | 0.2578  | 0.2143 | 5.64E-01 | -0.1381  | 0.2382   | 4.38E-05 | -0.8147 | 0.1841 |
| 14:41422436  | rs7493481   | A | G | 0.77 | 2.28E-01 | 0.2562  | 0.2118 | 5.18E-01 | -0.1521  | 0.2334   | 3.79E-05 | -0.8111 | 0.1815 |
| 14:41422987  | rs147526797 | G | A | 0.85 | 5.14E-01 | 0.1663  | 0.2547 | 5.19E-01 | -0.1800  | 0.2763   | 7.35E-05 | -0.9353 | 0.2188 |
| 14:41423886  | rs1779619   | T | C | 0.78 | 2.06E-01 | 0.2715  | 0.2136 | 4.59E-01 | -0.1760  | 0.2350   | 1.89E-05 | -0.8457 | 0.1812 |
| 14:41423954  | rs2799810   | A | G | 0.78 | 2.06E-01 | 0.2716  | 0.2137 | 4.58E-01 | -0.1762  | 0.2351   | 1.90E-05 | -0.8458 | 0.1812 |
| 14:41426098  | rs1176965   | A | G | 0.78 | 2.05E-01 | 0.2724  | 0.2138 | 4.58E-01 | -0.1764  | 0.2354   | 1.92E-05 | -0.8459 | 0.1814 |
| 14:41430655  | rs1176967   | G | T | 0.78 | 2.06E-01 | 0.2715  | 0.2134 | 4.60E-01 | -0.1755  | 0.2349   | 1.89E-05 | -0.8451 | 0.1810 |
| 14:41433519  | rs11310114  | D | R | 0.78 | 2.07E-01 | 0.2706  | 0.2135 | 4.62E-01 | -0.1746  | 0.2350   | 1.88E-05 | -0.8455 | 0.1811 |
| 14:41434415  | rs11379854  | I | R | 0.78 | 2.06E-01 | 0.2713  | 0.2134 | 4.60E-01 | -0.1753  | 0.2349   | 1.88E-05 | -0.8453 | 0.1810 |
| 14:41435764  | rs1176970   | C | G | 0.85 | 5.13E-01 | 0.1661  | 0.2540 | 5.25E-01 | -0.1774  | 0.2756   | 7.44E-05 | -0.9322 | 0.2182 |
| 14:41435835  | rs1176971   | G | A | 0.78 | 2.05E-01 | 0.2716  | 0.2133 | 4.60E-01 | -0.1753  | 0.2349   | 1.88E-05 | -0.8449 | 0.1809 |
| 14:41437680  | rs1176975   | A | C | 0.78 | 2.05E-01 | 0.2716  | 0.2133 | 4.60E-01 | -0.1751  | 0.2348   | 1.88E-05 | -0.8448 | 0.1809 |
| 14:41443217  | rs1176982   | G | A | 0.78 | 2.05E-01 | 0.2715  | 0.2133 | 4.61E-01 | -0.1750  | 0.2348   | 1.88E-05 | -0.8448 | 0.1809 |
| 14:41444274  | rs1176983   | A | T | 0.78 | 2.05E-01 | 0.2715  | 0.2133 | 4.61E-01 | -0.1750  | 0.2348   | 1.88E-05 | -0.8449 | 0.1809 |
| 14:41445446  | rs1176984   | A | T | 0.78 | 2.05E-01 | 0.2715  | 0.2133 | 4.61E-01 | -0.1750  | 0.2348   | 1.88E-05 | -0.8449 | 0.1809 |
| 14:41447232  | rs1176986   | G | A | 0.78 | 2.05E-01 | 0.2714  | 0.2133 | 4.61E-01 | -0.1750  | 0.2348   | 1.88E-05 | -0.8449 | 0.1809 |
| 14:41448393  | rs1176989   | G | A | 0.78 | 2.06E-01 | 0.2714  | 0.2134 | 4.61E-01 | -0.1750  | 0.2349   | 1.88E-05 | -0.8451 | 0.1810 |
| 14:41449148  | rs1176990   | T | G | 0.78 | 2.07E-01 | 0.2705  | 0.2134 | 4.63E-01 | -0.1742  | 0.2349   | 1.88E-05 | -0.8453 | 0.1810 |
| 14:41452298  | rs4630445   | T | G | 0.78 | 2.06E-01 | 0.2711  | 0.2134 | 4.61E-01 | -0.1749  | 0.2348   | 1.87E-05 | -0.8452 | 0.1810 |
| 14:41455080  | rs2600591   | C | T | 0.78 | 2.05E-01 | 0.2720  | 0.2134 | 4.62E-01 | -0.1747  | 0.2348   | 1.86E-05 | -0.8457 | 0.1810 |

|             |             |   |   |      |          |        |        |          |         |        |          |         |        |
|-------------|-------------|---|---|------|----------|--------|--------|----------|---------|--------|----------|---------|--------|
| 14:41455966 | N/A         | R | I | 0.89 | 2.98E-01 | 0.3330 | 0.3189 | 4.45E-01 | -0.2654 | 0.3463 | 6.62E-05 | -1.1841 | 0.2750 |
| 14:41458047 | rs2600589   | T | G | 0.78 | 1.99E-01 | 0.2765 | 0.2140 | 4.67E-01 | -0.1725 | 0.2350 | 1.74E-05 | -0.8508 | 0.1813 |
| 14:41461010 | rs1779591   | T | A | 0.78 | 1.95E-01 | 0.2790 | 0.2139 | 4.67E-01 | -0.1727 | 0.2349 | 1.71E-05 | -0.8513 | 0.1813 |
| 14:41461372 | rs1669561   | T | C | 0.78 | 1.96E-01 | 0.2781 | 0.2141 | 4.69E-01 | -0.1719 | 0.2350 | 1.71E-05 | -0.8520 | 0.1814 |
| 14:41465511 | rs1779594   | T | A | 0.78 | 1.92E-01 | 0.2810 | 0.2140 | 4.68E-01 | -0.1720 | 0.2348 | 1.69E-05 | -0.8521 | 0.1813 |
| 14:41465710 | rs1779595   | A | G | 0.78 | 1.91E-01 | 0.2811 | 0.2140 | 4.68E-01 | -0.1720 | 0.2348 | 1.69E-05 | -0.8522 | 0.1813 |
| 14:41466010 | rs1451956   | A | T | 0.85 | 5.13E-01 | 0.1659 | 0.2536 | 5.26E-01 | -0.1764 | 0.2751 | 7.45E-05 | -0.9303 | 0.2178 |
| 14:41466269 | rs1451955   | T | C | 0.85 | 5.13E-01 | 0.1659 | 0.2536 | 5.26E-01 | -0.1764 | 0.2751 | 7.45E-05 | -0.9303 | 0.2178 |
| 14:41467742 | rs1615343   | T | G | 0.85 | 5.13E-01 | 0.1658 | 0.2535 | 5.27E-01 | -0.1762 | 0.2750 | 7.44E-05 | -0.9300 | 0.2177 |
| 14:41468933 | rs1779597   | G | C | 0.78 | 1.88E-01 | 0.2831 | 0.2139 | 4.70E-01 | -0.1713 | 0.2349 | 1.69E-05 | -0.8521 | 0.1813 |
| 14:41469731 | rs1779598   | G | A | 0.77 | 1.77E-01 | 0.2893 | 0.2129 | 4.79E-01 | -0.1676 | 0.2345 | 1.80E-05 | -0.8467 | 0.1808 |
| 14:41471849 | rs7159099   | G | A | 0.77 | 1.74E-01 | 0.2908 | 0.2128 | 4.62E-01 | -0.1742 | 0.2345 | 1.79E-05 | -0.8465 | 0.1807 |
| 14:41472098 | rs1779602   | C | T | 0.76 | 2.54E-01 | 0.2488 | 0.2172 | 4.95E-01 | -0.1616 | 0.2347 | 2.30E-05 | -0.8501 | 0.1843 |
| 14:41472170 | rs10654526  | R | I | 0.76 | 2.53E-01 | 0.2490 | 0.2172 | 4.95E-01 | -0.1617 | 0.2347 | 2.30E-05 | -0.8504 | 0.1844 |
| 14:41472182 | rs1669597   | A | G | 0.76 | 2.54E-01 | 0.2487 | 0.2172 | 4.95E-01 | -0.1617 | 0.2347 | 2.30E-05 | -0.8502 | 0.1844 |
| 14:41472581 | rs1669595   | G | A | 0.76 | 2.53E-01 | 0.2491 | 0.2170 | 4.95E-01 | -0.1616 | 0.2346 | 2.33E-05 | -0.8491 | 0.1842 |
| 14:41472941 | rs34238285  | R | D | 0.76 | 2.50E-01 | 0.2502 | 0.2166 | 4.73E-01 | -0.1695 | 0.2343 | 2.52E-05 | -0.8446 | 0.1842 |
| 14:41473413 | rs1779603   | C | A | 0.76 | 2.52E-01 | 0.2493 | 0.2169 | 4.95E-01 | -0.1615 | 0.2346 | 2.34E-05 | -0.8485 | 0.1842 |
| 14:41473611 | rs1669594   | A | G | 0.76 | 2.52E-01 | 0.2493 | 0.2169 | 4.95E-01 | -0.1615 | 0.2346 | 2.35E-05 | -0.8484 | 0.1842 |
| 14:41473650 | rs1779604   | T | C | 0.76 | 2.52E-01 | 0.2494 | 0.2169 | 4.95E-01 | -0.1615 | 0.2346 | 2.35E-05 | -0.8484 | 0.1842 |
| 14:41473651 | rs1669593   | A | C | 0.76 | 2.52E-01 | 0.2494 | 0.2169 | 4.95E-01 | -0.1615 | 0.2346 | 2.35E-05 | -0.8484 | 0.1842 |
| 14:41473693 | rs1779605   | T | G | 0.76 | 2.53E-01 | 0.2490 | 0.2170 | 4.95E-01 | -0.1613 | 0.2346 | 2.34E-05 | -0.8487 | 0.1842 |
| 14:41473721 | rs1669592   | G | A | 0.76 | 2.52E-01 | 0.2495 | 0.2169 | 4.95E-01 | -0.1616 | 0.2346 | 2.37E-05 | -0.8479 | 0.1842 |
| 14:41474258 | rs1779606   | T | C | 0.76 | 2.52E-01 | 0.2496 | 0.2168 | 4.94E-01 | -0.1616 | 0.2345 | 2.37E-05 | -0.8478 | 0.1842 |
| 14:41474317 | rs7154583   | C | T | 0.76 | 2.49E-01 | 0.2511 | 0.2170 | 4.96E-01 | -0.1610 | 0.2347 | 2.33E-05 | -0.8493 | 0.1843 |
| 14:41474347 | rs2600596   | T | C | 0.76 | 2.52E-01 | 0.2496 | 0.2168 | 4.94E-01 | -0.1616 | 0.2345 | 2.37E-05 | -0.8478 | 0.1842 |
| 14:41474634 | rs35352678  | G | C | 0.76 | 2.51E-01 | 0.2496 | 0.2168 | 4.94E-01 | -0.1617 | 0.2345 | 2.37E-05 | -0.8477 | 0.1841 |
| 14:41474639 | rs35874866  | R | D | 0.76 | 2.51E-01 | 0.2496 | 0.2168 | 4.94E-01 | -0.1617 | 0.2345 | 2.37E-05 | -0.8477 | 0.1841 |
| 14:41474682 | rs2799812   | G | A | 0.77 | 2.46E-01 | 0.2563 | 0.2199 | 4.80E-01 | -0.1693 | 0.2376 | 2.56E-05 | -0.8568 | 0.1870 |
| 14:41474806 | rs2600595   | A | G | 0.76 | 2.51E-01 | 0.2496 | 0.2168 | 4.94E-01 | -0.1617 | 0.2345 | 2.37E-05 | -0.8476 | 0.1841 |
| 14:41474974 | rs1669590   | G | C | 0.76 | 2.52E-01 | 0.2496 | 0.2168 | 4.94E-01 | -0.1617 | 0.2345 | 2.36E-05 | -0.8480 | 0.1841 |
| 14:41475075 | rs1669589   | G | A | 0.76 | 2.51E-01 | 0.2497 | 0.2168 | 4.94E-01 | -0.1617 | 0.2345 | 2.38E-05 | -0.8476 | 0.1841 |
| 14:41475103 | rs562407310 | R | I | 0.77 | 2.32E-01 | 0.2674 | 0.2228 | 4.82E-01 | -0.1712 | 0.2422 | 2.88E-05 | -0.8643 | 0.1900 |
| 14:41475315 | rs1669588   | C | T | 0.76 | 2.51E-01 | 0.2497 | 0.2168 | 4.94E-01 | -0.1617 | 0.2345 | 2.38E-05 | -0.8475 | 0.1841 |

|             |             |   |   |      |          |         |        |          |         |        |          |         |        |
|-------------|-------------|---|---|------|----------|---------|--------|----------|---------|--------|----------|---------|--------|
| 14:41475513 | rs113357272 | R | I | 0.76 | 2.51E-01 | 0.2497  | 0.2168 | 4.94E-01 | -0.1617 | 0.2345 | 2.38E-05 | -0.8475 | 0.1841 |
| 14:41475683 | rs1612496   | G | A | 0.76 | 2.52E-01 | 0.2493  | 0.2168 | 4.94E-01 | -0.1616 | 0.2345 | 2.37E-05 | -0.8477 | 0.1841 |
| 14:41475734 | rs1613228   | G | C | 0.76 | 2.51E-01 | 0.2499  | 0.2168 | 4.95E-01 | -0.1615 | 0.2345 | 2.38E-05 | -0.8476 | 0.1842 |
| 14:41475756 | rs3031358   | R | I | 0.83 | 6.36E-02 | -0.5200 | 0.2766 | 7.77E-01 | -0.1004 | 0.3585 | 1.91E-05 | -0.8419 | 0.1805 |
| 14:41476239 | rs1779609   | G | A | 0.76 | 2.51E-01 | 0.2498  | 0.2168 | 4.94E-01 | -0.1618 | 0.2345 | 2.38E-05 | -0.8473 | 0.1841 |
| 14:41476282 | rs1669585   | A | C | 0.76 | 2.51E-01 | 0.2498  | 0.2167 | 4.94E-01 | -0.1618 | 0.2345 | 2.38E-05 | -0.8473 | 0.1841 |
| 14:41476418 | rs1779610   | G | C | 0.76 | 2.51E-01 | 0.2498  | 0.2167 | 4.94E-01 | -0.1618 | 0.2345 | 2.38E-05 | -0.8472 | 0.1841 |
| 14:41476952 | rs1619176   | A | G | 0.76 | 2.51E-01 | 0.2499  | 0.2167 | 4.94E-01 | -0.1618 | 0.2345 | 2.39E-05 | -0.8471 | 0.1841 |
| 14:41477083 | rs143210465 | R | I | 0.76 | 2.51E-01 | 0.2499  | 0.2168 | 4.94E-01 | -0.1619 | 0.2345 | 2.39E-05 | -0.8472 | 0.1841 |
| 14:41477359 | rs1779611   | T | A | 0.77 | 1.73E-01 | 0.2912  | 0.2122 | 4.81E-01 | -0.1666 | 0.2342 | 1.91E-05 | -0.8416 | 0.1804 |
| 14:41477679 | rs1612454   | A | T | 0.76 | 2.51E-01 | 0.2499  | 0.2167 | 4.94E-01 | -0.1619 | 0.2345 | 2.39E-05 | -0.8469 | 0.1841 |
| 14:41477727 | rs1612328   | C | T | 0.76 | 2.51E-01 | 0.2499  | 0.2167 | 4.94E-01 | -0.1619 | 0.2345 | 2.39E-05 | -0.8469 | 0.1841 |
| 14:41477769 | rs1669584   | T | C | 0.76 | 2.51E-01 | 0.2499  | 0.2167 | 4.94E-01 | -0.1619 | 0.2344 | 2.39E-05 | -0.8469 | 0.1841 |
| 14:41477781 | rs149908111 | R | I | 0.76 | 2.51E-01 | 0.2499  | 0.2167 | 4.94E-01 | -0.1619 | 0.2344 | 2.39E-05 | -0.8468 | 0.1841 |
| 14:41478071 | rs1779612   | G | A | 0.76 | 2.50E-01 | 0.2500  | 0.2167 | 4.94E-01 | -0.1619 | 0.2344 | 2.39E-05 | -0.8468 | 0.1841 |
| 14:41478129 | rs1779614   | G | A | 0.76 | 2.50E-01 | 0.2500  | 0.2167 | 4.94E-01 | -0.1619 | 0.2344 | 2.39E-05 | -0.8468 | 0.1841 |
| 14:41478461 | rs1669583   | A | G | 0.76 | 2.51E-01 | 0.2498  | 0.2167 | 4.94E-01 | -0.1619 | 0.2345 | 2.40E-05 | -0.8468 | 0.1841 |
| 14:41478666 | rs1669582   | A | G | 0.76 | 2.50E-01 | 0.2500  | 0.2166 | 4.93E-01 | -0.1619 | 0.2344 | 2.40E-05 | -0.8466 | 0.1840 |
| 14:41478818 | rs1779615   | A | G | 0.76 | 2.50E-01 | 0.2499  | 0.2167 | 4.93E-01 | -0.1619 | 0.2344 | 2.39E-05 | -0.8468 | 0.1840 |
| 14:41478952 | rs1669581   | G | A | 0.77 | 1.72E-01 | 0.2917  | 0.2122 | 4.80E-01 | -0.1671 | 0.2343 | 1.90E-05 | -0.8422 | 0.1805 |
| 14:41479417 | rs1376837   | T | C | 0.76 | 2.52E-01 | 0.2494  | 0.2167 | 4.94E-01 | -0.1619 | 0.2345 | 2.39E-05 | -0.8471 | 0.1841 |
| 14:41479846 | rs11434618  | R | I | 0.76 | 2.53E-01 | 0.2496  | 0.2174 | 4.91E-01 | -0.1630 | 0.2349 | 2.34E-05 | -0.8504 | 0.1846 |
| 14:41479877 | rs11280902  | R | I | 0.76 | 2.52E-01 | 0.2491  | 0.2168 | 4.94E-01 | -0.1619 | 0.2345 | 2.38E-05 | -0.8474 | 0.1841 |
| 14:41480093 | rs2600594   | A | G | 0.76 | 2.53E-01 | 0.2490  | 0.2168 | 4.93E-01 | -0.1620 | 0.2345 | 2.38E-05 | -0.8475 | 0.1842 |
| 14:41480894 | rs2799815   | T | A | 0.76 | 2.53E-01 | 0.2488  | 0.2168 | 4.94E-01 | -0.1619 | 0.2345 | 2.37E-05 | -0.8477 | 0.1842 |
| 14:41482769 | rs2799816   | C | T | 0.76 | 2.54E-01 | 0.2483  | 0.2169 | 4.94E-01 | -0.1619 | 0.2346 | 2.36E-05 | -0.8482 | 0.1842 |
| 14:41482885 | rs2799817   | C | T | 0.76 | 2.54E-01 | 0.2482  | 0.2169 | 4.94E-01 | -0.1619 | 0.2346 | 2.36E-05 | -0.8483 | 0.1842 |
| 14:41483437 | rs2600593   | C | T | 0.76 | 2.54E-01 | 0.2489  | 0.2172 | 4.93E-01 | -0.1624 | 0.2347 | 2.31E-05 | -0.8502 | 0.1844 |
| 14:41483459 | rs2600592   | G | A | 0.76 | 2.54E-01 | 0.2488  | 0.2172 | 4.93E-01 | -0.1624 | 0.2347 | 2.31E-05 | -0.8501 | 0.1844 |
| 14:41483719 | rs8010651   | G | T | 0.76 | 2.55E-01 | 0.2478  | 0.2171 | 4.94E-01 | -0.1620 | 0.2347 | 2.35E-05 | -0.8487 | 0.1843 |
| 14:41483859 | rs8010564   | C | T | 0.76 | 2.58E-01 | 0.2466  | 0.2172 | 4.94E-01 | -0.1618 | 0.2347 | 2.32E-05 | -0.8496 | 0.1843 |
| 14:41484094 | rs8014861   | A | G | 0.76 | 2.56E-01 | 0.2476  | 0.2171 | 4.93E-01 | -0.1621 | 0.2347 | 2.34E-05 | -0.8490 | 0.1843 |
| 14:41484355 | rs113750765 | R | D | 0.76 | 2.56E-01 | 0.2474  | 0.2171 | 4.93E-01 | -0.1621 | 0.2347 | 2.34E-05 | -0.8491 | 0.1843 |
| 14:41484459 | rs12323538  | T | C | 0.76 | 2.56E-01 | 0.2475  | 0.2171 | 4.94E-01 | -0.1619 | 0.2347 | 2.35E-05 | -0.8490 | 0.1843 |

|             |             |   |   |      |          |        |        |          |         |        |          |         |        |
|-------------|-------------|---|---|------|----------|--------|--------|----------|---------|--------|----------|---------|--------|
| 14:41484543 | rs12323835  | G | C | 0.76 | 2.56E-01 | 0.2474 | 0.2171 | 4.94E-01 | -0.1620 | 0.2347 | 2.34E-05 | -0.8492 | 0.1843 |
| 14:41484584 | rs12323833  | C | T | 0.76 | 2.56E-01 | 0.2473 | 0.2171 | 4.93E-01 | -0.1621 | 0.2347 | 2.33E-05 | -0.8493 | 0.1843 |
| 14:41484729 | rs12323842  | G | A | 0.76 | 2.57E-01 | 0.2471 | 0.2171 | 4.93E-01 | -0.1621 | 0.2347 | 2.33E-05 | -0.8494 | 0.1843 |
| 14:41484813 | rs12323548  | T | C | 0.76 | 2.57E-01 | 0.2471 | 0.2172 | 4.93E-01 | -0.1621 | 0.2347 | 2.33E-05 | -0.8495 | 0.1843 |
| 14:41485240 | rs112123716 | R | D | 0.76 | 2.28E-01 | 0.2618 | 0.2162 | 5.27E-01 | -0.1498 | 0.2351 | 2.47E-05 | -0.8445 | 0.1839 |
| 14:41485251 | rs72673799  | A | T | 0.76 | 2.58E-01 | 0.2467 | 0.2172 | 4.93E-01 | -0.1622 | 0.2347 | 2.32E-05 | -0.8497 | 0.1843 |
| 14:41485440 | rs2799791   | A | T | 0.76 | 2.58E-01 | 0.2466 | 0.2172 | 4.93E-01 | -0.1621 | 0.2348 | 2.32E-05 | -0.8499 | 0.1844 |
| 14:41485668 | rs2799792   | A | T | 0.76 | 2.59E-01 | 0.2463 | 0.2173 | 4.94E-01 | -0.1621 | 0.2348 | 2.32E-05 | -0.8501 | 0.1844 |
| 14:41485805 | rs2600575   | C | T | 0.77 | 1.78E-01 | 0.2882 | 0.2126 | 4.82E-01 | -0.1666 | 0.2345 | 1.86E-05 | -0.8440 | 0.1806 |
| 14:41485862 | rs2600576   | C | T | 0.77 | 1.79E-01 | 0.2878 | 0.2128 | 4.81E-01 | -0.1667 | 0.2346 | 1.85E-05 | -0.8448 | 0.1807 |
| 14:41486126 | rs2799793   | A | G | 0.76 | 2.59E-01 | 0.2460 | 0.2173 | 4.94E-01 | -0.1621 | 0.2348 | 2.31E-05 | -0.8503 | 0.1844 |
| 14:41486622 | rs2600578   | G | A | 0.76 | 2.60E-01 | 0.2459 | 0.2174 | 4.94E-01 | -0.1621 | 0.2348 | 2.31E-05 | -0.8505 | 0.1844 |
| 14:41486893 | rs1947332   | T | C | 0.76 | 2.59E-01 | 0.2461 | 0.2174 | 4.93E-01 | -0.1625 | 0.2349 | 2.26E-05 | -0.8516 | 0.1845 |
| 14:41486917 | rs1947333   | G | A | 0.76 | 2.60E-01 | 0.2457 | 0.2174 | 4.94E-01 | -0.1622 | 0.2349 | 2.28E-05 | -0.8512 | 0.1845 |
| 14:41487070 | rs1349567   | T | C | 0.76 | 2.61E-01 | 0.2455 | 0.2174 | 4.94E-01 | -0.1622 | 0.2349 | 2.30E-05 | -0.8507 | 0.1845 |
| 14:41487623 | rs1901471   | C | G | 0.77 | 1.49E-01 | 0.3103 | 0.2133 | 4.71E-01 | -0.1712 | 0.2349 | 2.12E-05 | -0.8440 | 0.1821 |
| 14:41487644 | rs34259503  | R | D | 0.77 | 1.49E-01 | 0.3103 | 0.2133 | 4.71E-01 | -0.1712 | 0.2349 | 2.11E-05 | -0.8440 | 0.1821 |
| 14:41488833 | rs2799796   | C | G | 0.76 | 2.21E-01 | 0.2683 | 0.2181 | 4.83E-01 | -0.1666 | 0.2352 | 2.62E-05 | -0.8502 | 0.1859 |
| 14:41489568 | rs1376822   | T | C | 0.76 | 2.22E-01 | 0.2677 | 0.2182 | 4.83E-01 | -0.1665 | 0.2353 | 2.61E-05 | -0.8506 | 0.1859 |
| 14:41489743 | rs1597738   | G | T | 0.76 | 2.22E-01 | 0.2677 | 0.2182 | 4.83E-01 | -0.1665 | 0.2353 | 2.61E-05 | -0.8507 | 0.1859 |
| 14:41489905 | rs1597739   | C | T | 0.76 | 2.22E-01 | 0.2676 | 0.2182 | 4.83E-01 | -0.1665 | 0.2353 | 2.61E-05 | -0.8507 | 0.1859 |
| 14:41490613 | rs2600586   | G | C | 0.76 | 2.23E-01 | 0.2671 | 0.2183 | 4.83E-01 | -0.1665 | 0.2353 | 2.60E-05 | -0.8510 | 0.1859 |
| 14:41491046 | rs111722085 | R | I | 0.76 | 2.24E-01 | 0.2668 | 0.2186 | 4.84E-01 | -0.1665 | 0.2356 | 2.62E-05 | -0.8519 | 0.1862 |
| 14:41491121 | rs1584703   | A | C | 0.77 | 1.52E-01 | 0.3085 | 0.2137 | 4.71E-01 | -0.1713 | 0.2351 | 2.07E-05 | -0.8459 | 0.1822 |
| 14:41492296 | rs2799799   | C | T | 0.76 | 2.25E-01 | 0.2661 | 0.2184 | 4.83E-01 | -0.1667 | 0.2354 | 2.58E-05 | -0.8520 | 0.1860 |
| 14:41492374 | rs2600587   | T | A | 0.76 | 2.25E-01 | 0.2661 | 0.2185 | 4.83E-01 | -0.1666 | 0.2354 | 2.57E-05 | -0.8521 | 0.1860 |
| 14:41492813 | rs1669580   | C | T | 0.76 | 2.26E-01 | 0.2658 | 0.2185 | 4.83E-01 | -0.1667 | 0.2354 | 2.57E-05 | -0.8524 | 0.1861 |
| 14:41493007 | rs58448393  | R | D | 0.77 | 1.53E-01 | 0.3074 | 0.2138 | 4.71E-01 | -0.1714 | 0.2352 | 2.05E-05 | -0.8469 | 0.1823 |
| 14:41493317 | rs1779588   | G | T | 0.76 | 2.27E-01 | 0.2655 | 0.2185 | 4.83E-01 | -0.1667 | 0.2354 | 2.56E-05 | -0.8526 | 0.1861 |
| 14:41493592 | rs67061054  | C | G | 0.76 | 2.27E-01 | 0.2653 | 0.2186 | 4.83E-01 | -0.1666 | 0.2355 | 2.56E-05 | -0.8527 | 0.1861 |
| 14:41493678 | rs147500813 | R | I | 0.76 | 2.70E-01 | 0.2415 | 0.2182 | 4.93E-01 | -0.1627 | 0.2353 | 2.23E-05 | -0.8548 | 0.1850 |
| 14:41494257 | rs9323038   | A | T | 0.76 | 2.27E-01 | 0.2651 | 0.2186 | 4.83E-01 | -0.1667 | 0.2355 | 2.55E-05 | -0.8530 | 0.1861 |
| 14:41494512 | rs1954472   | A | G | 0.76 | 2.28E-01 | 0.2650 | 0.2186 | 4.83E-01 | -0.1667 | 0.2355 | 2.54E-05 | -0.8531 | 0.1861 |
| 14:41494518 | rs1954473   | A | G | 0.76 | 2.28E-01 | 0.2650 | 0.2186 | 4.83E-01 | -0.1667 | 0.2355 | 2.54E-05 | -0.8531 | 0.1861 |

|             |             |   |   |      |          |        |        |          |         |        |          |         |        |
|-------------|-------------|---|---|------|----------|--------|--------|----------|---------|--------|----------|---------|--------|
| 14:41494633 | rs1954474   | G | C | 0.76 | 2.28E-01 | 0.2649 | 0.2187 | 4.83E-01 | -0.1667 | 0.2355 | 2.54E-05 | -0.8532 | 0.1862 |
| 14:41494778 | rs2415654   | A | G | 0.77 | 1.86E-01 | 0.2836 | 0.2134 | 4.82E-01 | -0.1668 | 0.2350 | 1.77E-05 | -0.8486 | 0.1811 |
| 14:41495053 | rs147758220 | R | I | 0.76 | 2.74E-01 | 0.2397 | 0.2183 | 4.96E-01 | -0.1615 | 0.2354 | 2.26E-05 | -0.8543 | 0.1851 |
| 14:41495075 | rs17111340  | C | T | 0.76 | 2.71E-01 | 0.2408 | 0.2182 | 4.94E-01 | -0.1623 | 0.2353 | 2.21E-05 | -0.8550 | 0.1849 |
| 14:41495950 | rs6572049   | G | A | 0.76 | 2.71E-01 | 0.2412 | 0.2183 | 4.94E-01 | -0.1624 | 0.2354 | 2.19E-05 | -0.8559 | 0.1850 |
| 14:41496113 | rs75164373  | R | D | 0.76 | 2.73E-01 | 0.2401 | 0.2183 | 4.94E-01 | -0.1623 | 0.2353 | 2.19E-05 | -0.8556 | 0.1849 |
| 14:41496606 | rs146718776 | R | D | 0.76 | 2.73E-01 | 0.2400 | 0.2183 | 4.94E-01 | -0.1623 | 0.2353 | 2.19E-05 | -0.8557 | 0.1850 |
| 14:41496693 | rs10135980  | T | A | 0.76 | 2.73E-01 | 0.2400 | 0.2183 | 4.94E-01 | -0.1623 | 0.2353 | 2.19E-05 | -0.8557 | 0.1850 |
| 14:41497045 | rs67038006  | C | T | 0.76 | 2.74E-01 | 0.2397 | 0.2183 | 4.94E-01 | -0.1623 | 0.2354 | 2.18E-05 | -0.8559 | 0.1850 |
| 14:41497387 | rs72676007  | A | T | 0.77 | 1.91E-01 | 0.2814 | 0.2139 | 4.82E-01 | -0.1669 | 0.2351 | 1.74E-05 | -0.8507 | 0.1813 |
| 14:41498119 | rs12050086  | C | T | 0.76 | 2.75E-01 | 0.2390 | 0.2185 | 4.94E-01 | -0.1623 | 0.2354 | 2.16E-05 | -0.8566 | 0.1850 |
| 14:41498376 | rs8004304   | A | G | 0.76 | 2.76E-01 | 0.2389 | 0.2185 | 4.94E-01 | -0.1623 | 0.2354 | 2.16E-05 | -0.8568 | 0.1850 |
| 14:41498447 | rs1954475   | G | A | 0.76 | 2.76E-01 | 0.2387 | 0.2185 | 4.94E-01 | -0.1623 | 0.2354 | 2.16E-05 | -0.8568 | 0.1851 |
| 14:41498655 | rs8006135   | T | G | 0.77 | 1.92E-01 | 0.2809 | 0.2140 | 4.82E-01 | -0.1668 | 0.2352 | 1.72E-05 | -0.8516 | 0.1814 |
| 14:41498957 | rs8005246   | A | G | 0.76 | 2.76E-01 | 0.2387 | 0.2185 | 4.94E-01 | -0.1623 | 0.2355 | 2.16E-05 | -0.8569 | 0.1851 |
| 14:41499225 | rs7147383   | C | T | 0.76 | 2.76E-01 | 0.2386 | 0.2185 | 4.94E-01 | -0.1624 | 0.2355 | 2.15E-05 | -0.8571 | 0.1851 |
| 14:41499284 | rs7147395   | A | G | 0.77 | 1.94E-01 | 0.2799 | 0.2141 | 4.82E-01 | -0.1668 | 0.2352 | 1.73E-05 | -0.8518 | 0.1815 |
| 14:41499733 | rs1959931   | G | A | 0.77 | 1.93E-01 | 0.2800 | 0.2140 | 4.82E-01 | -0.1668 | 0.2352 | 1.72E-05 | -0.8515 | 0.1814 |
| 14:41501740 | rs7493575   | T | G | 0.77 | 1.96E-01 | 0.2788 | 0.2142 | 4.82E-01 | -0.1667 | 0.2353 | 1.71E-05 | -0.8526 | 0.1815 |
| 14:41501802 | rs7493594   | T | A | 0.77 | 1.97E-01 | 0.2783 | 0.2144 | 4.82E-01 | -0.1669 | 0.2353 | 1.71E-05 | -0.8530 | 0.1816 |
| 14:41502321 | rs28593648  | G | A | 0.77 | 1.98E-01 | 0.2778 | 0.2144 | 4.82E-01 | -0.1668 | 0.2353 | 1.70E-05 | -0.8535 | 0.1817 |
| 14:41503268 | rs555526672 | A | G | 0.77 | 1.99E-01 | 0.2772 | 0.2146 | 4.82E-01 | -0.1669 | 0.2354 | 1.70E-05 | -0.8540 | 0.1817 |
| 14:41503269 | rs11325929  | R | D | 0.77 | 1.99E-01 | 0.2772 | 0.2146 | 4.82E-01 | -0.1669 | 0.2354 | 1.70E-05 | -0.8540 | 0.1817 |
| 14:41503270 | rs114459456 | A | G | 0.77 | 1.99E-01 | 0.2771 | 0.2145 | 4.82E-01 | -0.1669 | 0.2354 | 1.70E-05 | -0.8539 | 0.1817 |
| 14:41504193 | rs4494449   | G | A | 0.77 | 2.00E-01 | 0.2765 | 0.2146 | 4.82E-01 | -0.1668 | 0.2354 | 1.69E-05 | -0.8544 | 0.1818 |
| 14:41504619 | rs1959934   | T | C | 0.77 | 2.01E-01 | 0.2763 | 0.2147 | 4.82E-01 | -0.1668 | 0.2355 | 1.69E-05 | -0.8546 | 0.1818 |
| 14:41505403 | rs72676027  | T | C | 0.76 | 2.13E-01 | 0.2687 | 0.2147 | 4.76E-01 | -0.1690 | 0.2358 | 4.16E-05 | -0.8193 | 0.1844 |
| 14:41506666 | rs113499595 | R | D | 0.77 | 2.04E-01 | 0.2747 | 0.2152 | 4.82E-01 | -0.1674 | 0.2359 | 1.70E-05 | -0.8561 | 0.1822 |
| 14:41514577 | rs72676038  | G | A | 0.73 | 3.81E-01 | 0.1933 | 0.2204 | 2.30E-01 | -0.2830 | 0.2347 | 6.30E-05 | -0.8180 | 0.1893 |
| 14:49383170 | rs34413835  | C | T | 0.87 | 6.65E-05 | 1.1544 | 0.2699 | 1.35E-01 | -0.5920 | 0.3908 | 7.64E-02 | -0.5361 | 0.2971 |
| 14:49384848 | rs34626296  | A | G | 0.86 | 6.82E-05 | 1.1533 | 0.2701 | 1.33E-01 | -0.5945 | 0.3907 | 7.72E-02 | -0.5349 | 0.2973 |
| 14:58208926 | rs62003380  | A | C | 0.92 | 1.02E-01 | 0.5840 | 0.3531 | 5.68E-01 | -0.2274 | 0.3982 | 1.14E-05 | -1.4425 | 0.2998 |
| 14:58209985 | rs148516454 | A | G | 0.92 | 1.02E-01 | 0.5847 | 0.3543 | 5.68E-01 | -0.2278 | 0.3995 | 1.12E-05 | -1.4483 | 0.3007 |
| 14:66417960 | rs71422412  | C | T | 0.88 | 1.70E-05 | 1.1559 | 0.2476 | 5.44E-01 | -0.2051 | 0.3385 | 1.32E-01 | -0.4300 | 0.2811 |

|              |             |   |   |      |          |         |        |          |          |          |          |         |        |
|--------------|-------------|---|---|------|----------|---------|--------|----------|----------|----------|----------|---------|--------|
| 14:66421095  | rs7143906   | A | C | 0.88 | 1.59E-05 | 1.1404  | 0.2433 | 5.21E-01 | -0.2130  | 0.3321   | 1.33E-01 | -0.4219 | 0.2765 |
| 14:71308915  | rs36116033  | D | R | 0.94 | 2.17E-02 | -0.9629 | 0.4104 | 9.72E-05 | 305.3290 | 253.4890 | 1.46E-01 | 0.6114  | 0.4150 |
| 14:82542265  | rs1769392   | A | G | 0.84 | 4.89E-01 | 0.1800  | 0.2598 | 9.06E-01 | 0.0349   | 0.3037   | 8.21E-05 | -0.9488 | 0.2237 |
| 14:93047455  | rs1885747   | A | G | 0.81 | 8.37E-05 | -1.0331 | 0.2454 | 5.40E-01 | 0.2243   | 0.3630   | 1.39E-01 | 0.4071  | 0.2714 |
| 14:94669318  | rs569713795 | I | R | 0.68 | 2.46E-01 | -0.2564 | 0.2201 | 5.32E-05 | 1.3693   | 0.3733   | 7.37E-01 | 0.0737  | 0.2188 |
| 14:94737266  | rs7155943   | C | A | 0.72 | 3.25E-01 | -0.2094 | 0.2124 | 5.00E-05 | 1.2644   | 0.3404   | 2.61E-01 | 0.2366  | 0.2083 |
| 15:101975468 | rs12440721  | A | G | 0.83 | 8.84E-01 | -0.0468 | 0.3214 | 5.29E-01 | -0.2315  | 0.3621   | 6.21E-05 | -1.1862 | 0.2743 |
| 15:24618467  | rs569630056 | R | D | 0.62 | 9.28E-06 | -0.9931 | 0.2053 | 7.65E-03 | 0.7731   | 0.2952   | 2.07E-01 | 0.3020  | 0.2368 |
| 15:33630839  | rs8032058   | A | C | 0.53 | 7.66E-02 | 0.3425  | 0.1911 | 2.35E-01 | -0.3197  | 0.2616   | 8.79E-05 | -0.7121 | 0.1686 |
| 15:39273700  | rs12591611  | C | T | 0.94 | 4.74E-01 | 0.4685  | 0.6535 | 1.14E-01 | -1.2421  | 0.7337   | 7.15E-05 | -2.4046 | 0.5614 |
| 15:39274460  | rs72737120  | C | A | 0.94 | 4.73E-01 | 0.4683  | 0.6529 | 1.14E-01 | -1.2407  | 0.7334   | 7.24E-05 | -2.4010 | 0.5610 |
| 15:39303212  | rs72737170  | G | C | 0.94 | 4.73E-01 | 0.4716  | 0.6573 | 1.15E-01 | -1.2545  | 0.7424   | 4.69E-05 | -2.4708 | 0.5607 |
| 15:52708679  | rs7166275   | G | A | 0.86 | 2.71E-01 | -0.3244 | 0.2940 | 5.72E-05 | 1.6893   | 0.4884   | 6.71E-02 | 0.5294  | 0.2836 |
| 15:53312876  | rs1501028   | A | G | 0.92 | 9.74E-05 | 1.7003  | 0.4082 | 4.23E-01 | -0.4846  | 0.5850   | 1.91E-01 | -0.5981 | 0.4522 |
| 15:54209564  | rs8023992   | C | T | 0.78 | 1.88E-01 | 0.2876  | 0.2174 | 8.91E-05 | -0.8937  | 0.2136   | 3.30E-01 | -0.2115 | 0.2153 |
| 15:54211471  | rs59735059  | G | C | 0.78 | 1.96E-01 | 0.2801  | 0.2155 | 8.40E-05 | -0.8879  | 0.2113   | 3.28E-01 | -0.2103 | 0.2133 |
| 15:54211621  | rs17198272  | T | C | 0.78 | 1.94E-01 | 0.2812  | 0.2153 | 8.20E-05 | -0.8885  | 0.2112   | 3.28E-01 | -0.2101 | 0.2131 |
| 15:54215302  | rs72735043  | C | T | 0.78 | 1.97E-01 | 0.2801  | 0.2159 | 8.22E-05 | -0.8889  | 0.2112   | 3.27E-01 | -0.2112 | 0.2136 |
| 15:54219684  | rs11637143  | G | A | 0.78 | 1.97E-01 | 0.2805  | 0.2160 | 8.19E-05 | -0.8894  | 0.2113   | 3.26E-01 | -0.2119 | 0.2137 |
| 15:54219956  | rs11637199  | C | T | 0.78 | 1.97E-01 | 0.2805  | 0.2160 | 8.18E-05 | -0.8895  | 0.2113   | 3.26E-01 | -0.2119 | 0.2137 |
| 15:54220360  | rs113228023 | C | T | 0.78 | 1.97E-01 | 0.2805  | 0.2161 | 8.18E-05 | -0.8896  | 0.2113   | 3.26E-01 | -0.2120 | 0.2138 |
| 15:54221154  | rs72735050  | G | C | 0.78 | 1.96E-01 | 0.2807  | 0.2161 | 8.16E-05 | -0.8899  | 0.2114   | 3.25E-01 | -0.2124 | 0.2138 |
| 15:54221789  | rs72735051  | C | T | 0.78 | 1.94E-01 | 0.2819  | 0.2159 | 8.04E-05 | -0.8906  | 0.2114   | 3.25E-01 | -0.2121 | 0.2137 |
| 15:54222727  | rs80198808  | C | T | 0.78 | 1.94E-01 | 0.2820  | 0.2160 | 8.03E-05 | -0.8907  | 0.2114   | 3.25E-01 | -0.2122 | 0.2137 |
| 15:54223628  | rs61046113  | A | T | 0.78 | 1.97E-01 | 0.2806  | 0.2161 | 8.17E-05 | -0.8897  | 0.2113   | 3.25E-01 | -0.2122 | 0.2138 |
| 15:54224420  | rs111281496 | C | T | 0.78 | 2.00E-01 | 0.2778  | 0.2157 | 7.77E-05 | -0.8917  | 0.2112   | 3.29E-01 | -0.2101 | 0.2134 |
| 15:54225923  | rs72735057  | G | A | 0.78 | 1.94E-01 | 0.2827  | 0.2164 | 7.82E-05 | -0.8928  | 0.2115   | 3.20E-01 | -0.2150 | 0.2141 |
| 15:54228849  | rs57381713  | G | C | 0.78 | 1.92E-01 | 0.2840  | 0.2162 | 7.80E-05 | -0.8936  | 0.2118   | 3.24E-01 | -0.2130 | 0.2140 |
| 15:54232009  | rs36066540  | R | D | 0.70 | 4.16E-01 | -0.1594 | 0.1959 | 7.80E-05 | -0.9019  | 0.2137   | 3.30E-01 | -0.2107 | 0.2146 |
| 15:54232103  | rs1841936   | T | A | 0.78 | 1.93E-01 | 0.2837  | 0.2168 | 7.72E-05 | -0.8950  | 0.2119   | 3.23E-01 | -0.2140 | 0.2145 |
| 15:54236282  | rs146921946 | R | D | 0.78 | 1.92E-01 | 0.2849  | 0.2173 | 7.47E-05 | -0.8980  | 0.2122   | 3.21E-01 | -0.2150 | 0.2150 |
| 15:54240735  | rs113015617 | C | T | 0.78 | 1.90E-01 | 0.2866  | 0.2176 | 7.29E-05 | -0.9001  | 0.2124   | 3.20E-01 | -0.2159 | 0.2153 |
| 15:54242483  | rs1107319   | T | C | 0.78 | 1.91E-01 | 0.2863  | 0.2179 | 6.96E-05 | -0.9033  | 0.2126   | 3.17E-01 | -0.2177 | 0.2156 |
| 15:54245152  | rs752475    | A | G | 0.78 | 1.95E-01 | 0.2845  | 0.2184 | 6.21E-05 | -0.9103  | 0.2128   | 3.08E-01 | -0.2220 | 0.2159 |

|             |             |   |   |      |          |         |        |          |         |        |          |         |        |
|-------------|-------------|---|---|------|----------|---------|--------|----------|---------|--------|----------|---------|--------|
| 15:54248526 | rs72736938  | A | G | 0.78 | 2.06E-01 | 0.2784  | 0.2188 | 5.43E-05 | -0.9190 | 0.2131 | 2.96E-01 | -0.2282 | 0.2161 |
| 15:56329824 | rs1396744   | C | T | 0.64 | 6.97E-03 | 0.4729  | 0.1700 | 7.43E-05 | -0.7261 | 0.1763 | 2.47E-01 | -0.2062 | 0.1762 |
| 15:56329856 | rs1509401   | C | T | 0.64 | 6.97E-03 | 0.4729  | 0.1700 | 7.43E-05 | -0.7261 | 0.1763 | 2.47E-01 | -0.2062 | 0.1762 |
| 15:56329919 | rs1509402   | G | A | 0.64 | 7.07E-03 | 0.4734  | 0.1705 | 7.57E-05 | -0.7269 | 0.1766 | 2.48E-01 | -0.2063 | 0.1766 |
| 15:66547227 | rs35479908  | R | D | 0.68 | 9.61E-02 | 0.3861  | 0.2296 | 1.00E-01 | -0.4644 | 0.2800 | 7.99E-05 | -0.8571 | 0.2016 |
| 15:66547641 | rs1871006   | G | A | 0.68 | 9.54E-02 | 0.3868  | 0.2296 | 1.00E-01 | -0.4638 | 0.2800 | 7.92E-05 | -0.8575 | 0.2016 |
| 15:66551258 | rs1020927   | G | C | 0.68 | 9.51E-02 | 0.3869  | 0.2294 | 1.06E-01 | -0.4569 | 0.2805 | 7.94E-05 | -0.8567 | 0.2015 |
| 15:66553425 | rs11630157  | C | T | 0.68 | 9.48E-02 | 0.3869  | 0.2293 | 1.12E-01 | -0.4505 | 0.2807 | 7.99E-05 | -0.8557 | 0.2013 |
| 15:66558655 | rs11637318  | C | G | 0.68 | 9.66E-02 | 0.3838  | 0.2286 | 1.01E-01 | -0.4598 | 0.2782 | 8.26E-05 | -0.8518 | 0.2008 |
| 15:66559261 | rs11638535  | A | C | 0.68 | 9.72E-02 | 0.3830  | 0.2286 | 9.92E-02 | -0.4622 | 0.2778 | 8.25E-05 | -0.8516 | 0.2008 |
| 15:66560071 | rs11632542  | G | A | 0.68 | 9.72E-02 | 0.3827  | 0.2284 | 9.80E-02 | -0.4629 | 0.2772 | 8.36E-05 | -0.8502 | 0.2007 |
| 15:66564406 | rs11633568  | T | C | 0.68 | 1.00E-01 | 0.3777  | 0.2273 | 8.64E-02 | -0.4724 | 0.2728 | 8.97E-05 | -0.8427 | 0.1999 |
| 15:66564857 | rs141499259 | R | I | 0.67 | 6.94E-02 | 0.4018  | 0.2185 | 5.61E-02 | -0.4960 | 0.2576 | 7.50E-05 | -0.8221 | 0.1926 |
| 15:66565120 | rs34308029  | R | I | 0.66 | 7.68E-02 | 0.3967  | 0.2215 | 7.43E-02 | -0.4675 | 0.2602 | 6.93E-05 | -0.8355 | 0.1946 |
| 15:66565562 | rs11629698  | C | T | 0.67 | 7.49E-02 | 0.3900  | 0.2164 | 5.61E-02 | -0.4895 | 0.2542 | 9.32E-05 | -0.8038 | 0.1911 |
| 15:66566842 | rs113727994 | A | G | 0.67 | 7.55E-02 | 0.3889  | 0.2161 | 5.49E-02 | -0.4905 | 0.2533 | 9.45E-05 | -0.8023 | 0.1910 |
| 15:66567630 | rs111401726 | R | D | 0.67 | 7.57E-02 | 0.3884  | 0.2160 | 5.42E-02 | -0.4912 | 0.2529 | 9.53E-05 | -0.8015 | 0.1909 |
| 15:66568111 | rs11633808  | C | T | 0.67 | 7.57E-02 | 0.3884  | 0.2160 | 5.39E-02 | -0.4915 | 0.2527 | 9.43E-05 | -0.8019 | 0.1909 |
| 15:66568700 | rs11635096  | G | A | 0.67 | 7.58E-02 | 0.3882  | 0.2160 | 5.29E-02 | -0.4936 | 0.2526 | 9.62E-05 | -0.8009 | 0.1909 |
| 15:66569207 | rs11635253  | C | T | 0.67 | 7.62E-02 | 0.3876  | 0.2160 | 5.40E-02 | -0.4913 | 0.2527 | 9.63E-05 | -0.8009 | 0.1909 |
| 15:66569347 | rs11630558  | T | G | 0.67 | 7.59E-02 | 0.3878  | 0.2159 | 5.40E-02 | -0.4911 | 0.2526 | 9.61E-05 | -0.8006 | 0.1908 |
| 15:66571246 | rs11635867  | T | C | 0.67 | 7.56E-02 | 0.3881  | 0.2159 | 5.55E-02 | -0.4888 | 0.2531 | 9.55E-05 | -0.8008 | 0.1908 |
| 15:66571968 | rs12908529  | T | G | 0.67 | 7.56E-02 | 0.3882  | 0.2159 | 5.61E-02 | -0.4879 | 0.2532 | 9.52E-05 | -0.8009 | 0.1907 |
| 15:66573234 | rs12913465  | C | A | 0.67 | 7.47E-02 | 0.3911  | 0.2167 | 5.37E-02 | -0.4953 | 0.2542 | 8.33E-05 | -0.8101 | 0.1911 |
| 15:66575550 | rs9920422   | T | A | 0.67 | 7.37E-02 | 0.3944  | 0.2178 | 5.11E-02 | -0.5040 | 0.2555 | 7.12E-05 | -0.8209 | 0.1916 |
| 15:66575781 | rs11637450  | C | T | 0.67 | 7.36E-02 | 0.3946  | 0.2179 | 5.09E-02 | -0.5046 | 0.2556 | 6.99E-05 | -0.8221 | 0.1916 |
| 15:66575972 | rs34807609  | R | D | 0.67 | 7.36E-02 | 0.3948  | 0.2180 | 5.07E-02 | -0.5053 | 0.2557 | 6.91E-05 | -0.8229 | 0.1917 |
| 15:66577043 | rs17198181  | T | C | 0.67 | 7.72E-02 | 0.3980  | 0.2225 | 4.83E-02 | -0.5239 | 0.2626 | 7.32E-05 | -0.8369 | 0.1957 |
| 15:66582298 | rs8038295   | G | T | 0.67 | 7.14E-02 | 0.4030  | 0.2207 | 4.35E-02 | -0.5303 | 0.2588 | 4.35E-05 | -0.8533 | 0.1927 |
| 15:66583433 | rs13329434  | T | C | 0.67 | 7.10E-02 | 0.4046  | 0.2213 | 4.25E-02 | -0.5344 | 0.2594 | 4.10E-05 | -0.8578 | 0.1930 |
| 15:80257355 | rs6495460   | T | C | 0.87 | 7.67E-05 | -1.1129 | 0.2627 | 1.14E-01 | 0.6575  | 0.4265 | 1.98E-01 | 0.3806  | 0.2924 |
| 15:85720485 | rs2342130   | T | C | 0.69 | 7.66E-05 | 0.8350  | 0.1971 | 3.79E-01 | -0.2584 | 0.2876 | 7.78E-01 | 0.0630  | 0.2224 |
| 15:85720488 | rs2342129   | C | G | 0.69 | 7.66E-05 | 0.8350  | 0.1971 | 3.79E-01 | -0.2584 | 0.2876 | 7.78E-01 | 0.0630  | 0.2224 |
| 15:88457639 | rs7182329   | G | A | 0.70 | 6.43E-05 | 0.9530  | 0.2223 | 4.53E-02 | -0.6680 | 0.3430 | 6.38E-01 | 0.1187  | 0.2513 |

|             |             |   |   |      |          |         |        |          |         |        |          |         |        |
|-------------|-------------|---|---|------|----------|---------|--------|----------|---------|--------|----------|---------|--------|
| 15:88457668 | rs12595804  | C | T | 0.68 | 6.39E-05 | 0.9203  | 0.2146 | 7.34E-02 | -0.5724 | 0.3250 | 7.00E-01 | -0.0940 | 0.2427 |
| 15:88458188 | rs7168017   | T | C | 0.68 | 5.53E-05 | 0.9241  | 0.2134 | 8.30E-02 | -0.5528 | 0.3245 | 7.12E-01 | -0.0898 | 0.2420 |
| 15:88462348 | rs11402002  | I | R | 0.38 | 7.08E-05 | -0.7763 | 0.1823 | 6.25E-02 | 0.5323  | 0.2879 | 7.07E-01 | 0.0779  | 0.2058 |
| 15:88463831 | rs11855377  | T | C | 0.67 | 5.44E-05 | 0.9108  | 0.2101 | 5.69E-02 | -0.6388 | 0.3457 | 7.53E-01 | 0.0754  | 0.2384 |
| 15:88464110 | rs1465747   | C | T | 0.67 | 7.11E-05 | 0.9136  | 0.2146 | 5.89E-02 | -0.6387 | 0.3492 | 7.25E-01 | 0.0858  | 0.2423 |
| 15:88464729 | rs1435398   | C | T | 0.33 | 5.68E-05 | -0.8848 | 0.2046 | 6.10E-02 | 0.6153  | 0.3374 | 7.75E-01 | -0.0668 | 0.2321 |
| 15:88465787 | rs6496456   | T | G | 0.67 | 6.57E-05 | 0.8977  | 0.2097 | 6.12E-02 | -0.6227 | 0.3428 | 7.43E-01 | 0.0781  | 0.2372 |
| 15:88465968 | rs1007533   | C | T | 0.34 | 6.28E-05 | -0.8807 | 0.2051 | 6.08E-02 | 0.6191  | 0.3388 | 6.95E-01 | -0.0914 | 0.2320 |
| 15:88466105 | rs1007534   | C | T | 0.34 | 6.29E-05 | -0.8805 | 0.2051 | 6.08E-02 | 0.6192  | 0.3388 | 6.95E-01 | -0.0916 | 0.2320 |
| 15:97225761 | rs4255753   | C | T | 0.81 | 8.71E-05 | -0.8524 | 0.2030 | 3.67E-01 | 0.3009  | 0.3390 | 4.99E-01 | 0.1552  | 0.2279 |
| 15:97226109 | rs4965123   | C | T | 0.81 | 8.65E-05 | -0.8478 | 0.2018 | 3.65E-01 | 0.2998  | 0.3369 | 5.09E-01 | 0.1506  | 0.2266 |
| 15:97226225 | rs34290938  | T | C | 0.81 | 8.68E-05 | -0.8474 | 0.2018 | 3.65E-01 | 0.2997  | 0.3367 | 5.09E-01 | 0.1505  | 0.2265 |
| 15:97226327 | rs34085497  | A | G | 0.81 | 8.66E-05 | -0.8476 | 0.2018 | 3.65E-01 | 0.2997  | 0.3366 | 5.09E-01 | 0.1504  | 0.2265 |
| 15:97226562 | rs4453438   | T | C | 0.81 | 8.70E-05 | -0.8471 | 0.2017 | 3.65E-01 | 0.2997  | 0.3366 | 5.08E-01 | 0.1507  | 0.2265 |
| 15:97227549 | rs4608300   | G | A | 0.81 | 9.07E-05 | -0.8454 | 0.2019 | 3.65E-01 | 0.2994  | 0.3364 | 5.10E-01 | 0.1503  | 0.2265 |
| 15:97227644 | rs4246284   | T | C | 0.81 | 8.52E-05 | -0.8487 | 0.2018 | 3.66E-01 | 0.2992  | 0.3367 | 5.07E-01 | 0.1513  | 0.2266 |
| 15:97229189 | rs5814751   | D | R | 0.81 | 8.60E-05 | -0.8486 | 0.2019 | 3.66E-01 | 0.2993  | 0.3368 | 5.09E-01 | 0.1507  | 0.2267 |
| 15:97229324 | rs4447389   | G | A | 0.81 | 8.49E-05 | -0.8493 | 0.2019 | 3.67E-01 | 0.2988  | 0.3368 | 5.08E-01 | 0.1511  | 0.2268 |
| 15:97229809 | rs4493012   | A | G | 0.81 | 8.45E-05 | -0.8500 | 0.2020 | 3.67E-01 | 0.2989  | 0.3369 | 5.08E-01 | 0.1512  | 0.2269 |
| 16:10252909 | rs8050482   | T | C | 0.59 | 1.94E-01 | -0.2526 | 0.1933 | 7.34E-01 | 0.0810  | 0.2398 | 9.82E-05 | 0.7066  | 0.1686 |
| 16:10256135 | rs4587976   | G | C | 0.57 | 1.63E-01 | -0.2731 | 0.1944 | 7.67E-01 | 0.0712  | 0.2388 | 8.75E-05 | 0.7170  | 0.1698 |
| 16:10264737 | rs34463380  | R | D | 0.59 | 3.08E-01 | 0.2153  | 0.2107 | 6.05E-01 | -0.1340 | 0.2628 | 6.75E-05 | -0.7812 | 0.1817 |
| 16:2331430  | rs149532    | G | A | 0.89 | 3.48E-01 | 0.3072  | 0.3267 | 5.54E-01 | -0.2070 | 0.3499 | 7.54E-05 | -1.2025 | 0.2818 |
| 16:2340603  | rs161424    | C | G | 0.89 | 3.62E-01 | 0.3022  | 0.3306 | 5.61E-01 | -0.2070 | 0.3560 | 6.88E-05 | -1.2223 | 0.2846 |
| 16:2348820  | rs11647731  | G | C | 0.89 | 4.37E-01 | 0.2642  | 0.3399 | 7.84E-01 | -0.1019 | 0.3733 | 2.59E-05 | -1.3154 | 0.2873 |
| 16:2349206  | rs114077531 | C | T | 0.88 | 4.93E-01 | 0.2297  | 0.3350 | 7.43E-01 | -0.1191 | 0.3650 | 7.42E-05 | -1.2299 | 0.2879 |
| 16:2355828  | rs73500183  | G | A | 0.89 | 5.69E-01 | 0.1912  | 0.3360 | 9.30E-01 | -0.0328 | 0.3769 | 2.87E-05 | -1.2908 | 0.2838 |
| 16:4106786  | rs2239314   | G | A | 0.77 | 2.98E-05 | 0.9205  | 0.2041 | 9.89E-01 | 0.0043  | 0.3025 | 9.86E-01 | 0.0042  | 0.2342 |
| 16:4116831  | rs2041245   | T | A | 0.77 | 1.69E-05 | 0.9294  | 0.1990 | 8.52E-01 | -0.0572 | 0.2952 | 9.63E-01 | -0.0106 | 0.2305 |
| 16:4124108  | rs2601812   | G | T | 0.77 | 2.03E-05 | 0.9139  | 0.1979 | 7.31E-01 | -0.1040 | 0.2911 | 9.72E-01 | -0.0081 | 0.2285 |
| 16:58246346 | rs16959814  | T | C | 0.84 | 9.33E-05 | 0.8315  | 0.1990 | 4.10E-01 | -0.2360 | 0.2782 | 3.63E-01 | -0.2041 | 0.2224 |
| 16:58246889 | rs4608323   | A | G | 0.84 | 9.88E-05 | 0.8260  | 0.1985 | 4.01E-01 | -0.2398 | 0.2768 | 3.42E-01 | -0.2120 | 0.2214 |
| 16:58261035 | rs734893    | C | T | 0.88 | 8.42E-05 | 1.0633  | 0.2526 | 9.64E-01 | -0.0180 | 0.3961 | 3.52E-01 | -0.2656 | 0.2827 |
| 16:58262486 | rs201058553 | R | I | 0.83 | 4.10E-05 | 1.0248  | 0.2319 | 4.04E-02 | -0.6185 | 0.2842 | 4.72E-01 | -0.1908 | 0.2635 |

|             |             |   |   |      |          |         |        |          |         |        |          |         |        |
|-------------|-------------|---|---|------|----------|---------|--------|----------|---------|--------|----------|---------|--------|
| 16:77959909 | rs2435079   | T | C | 0.71 | 2.85E-05 | -1.1887 | 0.2629 | 8.78E-01 | 0.0609  | 0.3886 | 1.46E-01 | 0.4369  | 0.2962 |
| 16:84859107 | rs12934143  | G | A | 0.40 | 2.68E-02 | 0.4817  | 0.2132 | 4.28E-05 | -1.1742 | 0.3000 | 4.15E-01 | -0.1787 | 0.2177 |
| 16:86617955 | rs4843401   | T | G | 0.57 | 6.45E-01 | 0.1189  | 0.2583 | 3.52E-05 | -1.2600 | 0.3086 | 3.75E-01 | -0.2257 | 0.2526 |
| 16:86688819 | rs300038    | T | C | 0.74 | 2.64E-02 | -0.4799 | 0.2119 | 1.21E-02 | 0.7120  | 0.3025 | 3.04E-05 | 0.8459  | 0.1866 |
| 16:86689335 | rs4843418   | G | C | 0.72 | 7.31E-03 | -0.5179 | 0.1873 | 6.81E-03 | 0.7236  | 0.2875 | 8.34E-05 | 0.7255  | 0.1712 |
| 16:87951377 | rs548123416 | T | A | 0.89 | 9.66E-01 | 0.0141  | 0.3317 | 2.97E-01 | 0.4624  | 0.4536 | 7.77E-05 | 1.2099  | 0.2841 |
| 16:87951378 | rs566667449 | G | A | 0.89 | 9.67E-01 | 0.0138  | 0.3317 | 2.97E-01 | 0.4626  | 0.4537 | 7.77E-05 | 1.2099  | 0.2841 |
| 16:8908811  | rs8057024   | A | G | 0.43 | 1.76E-01 | 0.3289  | 0.2416 | 2.73E-06 | -1.4127 | 0.2959 | 7.49E-01 | 0.0774  | 0.2412 |
| 17:12800766 | rs78520683  | T | C | 0.87 | 9.70E-01 | -0.0116 | 0.3145 | 2.47E-01 | 0.4370  | 0.3873 | 2.67E-05 | 1.2087  | 0.2645 |
| 17:12815191 | rs77337685  | T | C | 0.91 | 6.21E-01 | -0.1846 | 0.3733 | 2.19E-01 | 0.5470  | 0.4533 | 4.13E-05 | 1.4087  | 0.3170 |
| 17:12819502 | rs7225504   | T | C | 0.91 | 6.28E-01 | -0.1810 | 0.3734 | 2.19E-01 | 0.5469  | 0.4531 | 4.36E-05 | 1.4054  | 0.3174 |
| 17:13388145 | rs55863028  | C | T | 0.54 | 1.62E-05 | -0.7862 | 0.1679 | 5.46E-01 | 0.1507  | 0.2548 | 6.56E-01 | 0.0871  | 0.1943 |
| 17:13388937 | rs2190821   | T | C | 0.57 | 7.05E-05 | -0.7457 | 0.1750 | 6.20E-01 | 0.1242  | 0.2556 | 8.14E-01 | 0.0467  | 0.1978 |
| 17:13390118 | rs5819416   | R | D | 0.54 | 1.49E-05 | -0.7857 | 0.1670 | 5.06E-01 | 0.1652  | 0.2545 | 6.52E-01 | 0.0877  | 0.1935 |
| 17:13391511 | rs7213995   | A | C | 0.54 | 6.70E-06 | 0.7977  | 0.1619 | 1.61E-01 | -0.3280 | 0.2394 | 7.23E-01 | -0.0678 | 0.1902 |
| 17:13392543 | rs7220676   | T | C | 0.57 | 5.24E-05 | -0.7564 | 0.1740 | 5.90E-01 | 0.1353  | 0.2563 | 8.06E-01 | 0.0487  | 0.1977 |
| 17:13393244 | rs8081141   | T | G | 0.54 | 4.37E-06 | 0.8148  | 0.1615 | 1.81E-01 | -0.3126 | 0.2388 | 6.76E-01 | -0.0802 | 0.1911 |
| 17:13393882 | rs7209938   | G | A | 0.54 | 4.35E-06 | 0.8148  | 0.1614 | 1.80E-01 | -0.3139 | 0.2389 | 6.81E-01 | -0.0790 | 0.1911 |
| 17:13395795 | rs9675262   | C | T | 0.54 | 1.27E-05 | -0.7857 | 0.1654 | 4.95E-01 | 0.1694  | 0.2531 | 6.74E-01 | 0.0814  | 0.1922 |
| 17:13397297 | rs4792364   | C | G | 0.57 | 1.41E-05 | 0.7922  | 0.1678 | 1.73E-01 | -0.3281 | 0.2489 | 9.64E-01 | -0.0088 | 0.1950 |
| 17:13399486 | rs67951062  | R | I | 0.61 | 6.46E-05 | -0.8370 | 0.1953 | 8.60E-01 | 0.0517  | 0.3001 | 4.45E-01 | -0.1913 | 0.2489 |
| 17:14579953 | rs76207825  | A | G | 0.95 | 8.58E-05 | 1.7604  | 0.4189 | 4.77E-01 | -0.3683 | 0.5100 | 5.52E-01 | -0.2813 | 0.4706 |
| 17:33512756 | rs6505449   | T | A | 0.66 | 4.45E-01 | -0.1510 | 0.1975 | 5.57E-02 | 0.4067  | 0.2169 | 5.76E-05 | 0.7353  | 0.1692 |
| 17:39133514 | rs34386311  | R | I | 0.92 | 3.90E-05 | -1.5209 | 0.3431 | 1.18E-01 | 0.9039  | 0.6135 | 2.91E-01 | 0.4137  | 0.3881 |
| 17:4498641  | rs12939239  | A | G | 0.86 | 3.46E-01 | 0.2743  | 0.2905 | 6.89E-05 | -1.0823 | 0.2545 | 2.11E-01 | -0.3593 | 0.2839 |
| 17:4499121  | rs2035262   | G | A | 0.84 | 5.35E-01 | 0.1598  | 0.2580 | 3.06E-05 | -1.0486 | 0.2349 | 3.33E-01 | -0.2466 | 0.2524 |
| 17:4500072  | rs9906333   | G | A | 0.84 | 5.33E-01 | 0.1613  | 0.2591 | 3.18E-05 | -1.0541 | 0.2368 | 3.37E-01 | -0.2456 | 0.2535 |
| 17:4502083  | rs4790656   | C | T | 0.84 | 5.54E-01 | 0.1588  | 0.2687 | 5.70E-05 | -1.0739 | 0.2495 | 3.81E-01 | -0.2322 | 0.2632 |
| 17:53537811 | rs11397688  | R | I | 0.23 | 4.70E-03 | -0.6398 | 0.2188 | 2.73E-01 | 0.2937  | 0.2654 | 3.87E-05 | 0.8871  | 0.1988 |
| 17:66433134 | rs139267277 | R | D | 0.63 | 9.21E-05 | 0.7922  | 0.1894 | 2.60E-01 | -0.2976 | 0.2553 | 2.02E-01 | -0.2714 | 0.2102 |
| 18:22284668 | rs339939    | C | T | 0.42 | 5.84E-05 | 0.7182  | 0.1664 | 3.28E-01 | 0.2265  | 0.2211 | 6.27E-02 | -0.3476 | 0.1831 |
| 18:22296768 | rs1668095   | A | C | 0.61 | 7.08E-05 | -0.7002 | 0.1644 | 8.04E-01 | -0.0618 | 0.2373 | 1.15E-01 | 0.2913  | 0.1818 |
| 18:22304787 | rs2443015   | A | G | 0.42 | 9.96E-05 | 0.7066  | 0.1699 | 2.87E-01 | 0.2501  | 0.2241 | 9.93E-02 | -0.3125 | 0.1865 |
| 18:22305096 | rs1680320   | C | T | 0.42 | 9.91E-05 | 0.7068  | 0.1699 | 2.87E-01 | 0.2503  | 0.2241 | 9.94E-02 | -0.3124 | 0.1865 |

|             |             |   |   |      |          |         |        |          |           |          |          |         |        |
|-------------|-------------|---|---|------|----------|---------|--------|----------|-----------|----------|----------|---------|--------|
| 18:22305197 | rs10607323  | D | R | 0.59 | 6.27E-05 | -0.6977 | 0.1625 | 5.17E-01 | -0.1548   | 0.2255   | 6.95E-03 | 0.4833  | 0.1726 |
| 18:22305924 | rs1668107   | G | A | 0.42 | 9.69E-05 | 0.7080  | 0.1699 | 2.92E-01 | 0.2482    | 0.2245   | 9.93E-02 | -0.3126 | 0.1866 |
| 18:22306116 | rs1668108   | A | G | 0.42 | 9.65E-05 | 0.7082  | 0.1699 | 2.93E-01 | 0.2478    | 0.2246   | 9.93E-02 | -0.3126 | 0.1866 |
| 18:22306314 | rs74889671  | R | D | 0.42 | 9.61E-05 | 0.7085  | 0.1699 | 2.93E-01 | 0.2474    | 0.2247   | 9.93E-02 | -0.3127 | 0.1866 |
| 18:22306607 | rs1680346   | G | T | 0.42 | 9.54E-05 | 0.7089  | 0.1699 | 2.95E-01 | 0.2467    | 0.2248   | 9.93E-02 | -0.3127 | 0.1866 |
| 18:22306699 | rs1668109   | T | C | 0.42 | 9.48E-05 | 0.7092  | 0.1699 | 2.96E-01 | 0.2462    | 0.2249   | 9.93E-02 | -0.3127 | 0.1867 |
| 18:22306767 | rs1680347   | G | A | 0.42 | 9.43E-05 | 0.7094  | 0.1699 | 2.97E-01 | 0.2458    | 0.2250   | 9.93E-02 | -0.3128 | 0.1867 |
| 18:22307357 | rs1668110   | C | T | 0.42 | 9.38E-05 | 0.7098  | 0.1699 | 2.97E-01 | 0.2459    | 0.2250   | 9.97E-02 | -0.3125 | 0.1867 |
| 18:22307480 | rs1680348   | A | C | 0.42 | 9.46E-05 | 0.7096  | 0.1700 | 2.96E-01 | 0.2462    | 0.2249   | 1.00E-01 | -0.3123 | 0.1868 |
| 18:24286681 | rs470841    | T | C | 0.65 | 7.10E-03 | 0.5434  | 0.1958 | 2.71E-01 | -0.2661   | 0.2340   | 4.09E-05 | -0.7864 | 0.1769 |
| 18:26585983 | rs199597833 | A | C | 0.93 | 8.62E-01 | -0.0939 | 0.5411 | 8.21E-05 | 3.9188    | 1.1726   | 8.49E-01 | -0.1016 | 0.5320 |
| 18:26585984 | rs200540108 | C | T | 0.93 | 8.62E-01 | -0.0939 | 0.5411 | 8.23E-05 | 3.9180    | 1.1725   | 8.48E-01 | -0.1025 | 0.5320 |
| 18:3273849  | rs57640442  | G | T | 0.72 | 8.91E-05 | 0.8107  | 0.1934 | 9.06E-01 | 0.0356    | 0.3014   | 2.66E-01 | -0.2420 | 0.2155 |
| 18:3700584  | rs11662353  | A | G | 0.87 | 5.33E-01 | 0.2040  | 0.3274 | 9.03E-01 | -0.0483   | 0.3969   | 9.81E-05 | -1.1834 | 0.2824 |
| 18:3702197  | rs55815210  | G | A | 0.88 | 5.23E-01 | 0.2143  | 0.3354 | 9.14E-01 | -0.0439   | 0.4077   | 9.86E-05 | -1.2121 | 0.2894 |
| 18:43083666 | rs12454126  | A | G | 0.92 | 8.41E-01 | 0.0762  | 0.3813 | 3.63E-01 | 0.4328    | 0.4803   | 9.22E-05 | 1.3783  | 0.3275 |
| 18:50823502 | rs10617714  | R | D | 0.93 | 4.14E-01 | 0.3211  | 0.3926 | 6.27E-05 | 1304.0700 | 661.7200 | 5.91E-01 | 0.2096  | 0.3873 |
| 18:50824089 | rs12960007  | A | C | 0.93 | 4.13E-01 | 0.3214  | 0.3927 | 8.31E-05 | 1257.3100 | 661.6240 | 5.91E-01 | 0.2095  | 0.3874 |
| 18:50824183 | rs12961446  | T | C | 0.93 | 4.13E-01 | 0.3221  | 0.3928 | 8.31E-05 | 1257.3100 | 661.6240 | 5.91E-01 | 0.2095  | 0.3875 |
| 18:59269343 | rs33987401  | R | D | 0.51 | 5.55E-05 | 0.7921  | 0.1829 | 5.11E-01 | -0.1772   | 0.2733   | 7.74E-01 | -0.0600 | 0.2075 |
| 18:59269346 | rs199618199 | T | A | 0.51 | 5.54E-05 | 0.7921  | 0.1829 | 5.12E-01 | -0.1770   | 0.2733   | 7.74E-01 | -0.0600 | 0.2075 |
| 18:60967699 | rs2615195   | C | G | 0.85 | 4.32E-02 | 0.5893  | 0.2867 | 3.02E-01 | -0.3663   | 0.3436   | 5.12E-05 | -1.1077 | 0.2528 |
| 18:68839134 | rs10460134  | T | C | 0.61 | 9.95E-05 | 0.6549  | 0.1574 | 7.47E-04 | -0.7441   | 0.2206   | 5.39E-01 | -0.1091 | 0.1764 |
| 18:68839205 | rs72970356  | A | G | 0.79 | 1.33E-05 | 0.9746  | 0.2057 | 4.09E-03 | -0.7607   | 0.2509   | 6.18E-01 | -0.1198 | 0.2388 |
| 18:68839629 | rs79057581  | C | A | 0.80 | 2.35E-05 | 1.0180  | 0.2224 | 2.84E-03 | -0.8165   | 0.2621   | 6.40E-01 | -0.1201 | 0.2557 |
| 18:68839803 | rs8084484   | C | T | 0.61 | 9.10E-05 | 0.6530  | 0.1560 | 8.28E-04 | -0.7340   | 0.2190   | 5.23E-01 | -0.1126 | 0.1750 |
| 18:68840752 | rs72970372  | T | C | 0.82 | 8.00E-05 | 0.9802  | 0.2321 | 3.67E-02 | -0.5793   | 0.2658   | 8.51E-01 | -0.0493 | 0.2618 |
| 18:68841687 | rs561503976 | T | G | 0.83 | 7.06E-05 | 0.9952  | 0.2336 | 3.60E-02 | -0.5852   | 0.2676   | 8.22E-01 | -0.0597 | 0.2641 |
| 18:68841691 | rs148585323 | T | G | 0.83 | 5.91E-05 | 1.0264  | 0.2380 | 3.24E-02 | -0.6129   | 0.2750   | 9.26E-01 | -0.0253 | 0.2700 |
| 18:68841699 | rs146157448 | T | G | 0.83 | 7.68E-05 | 1.0091  | 0.2382 | 3.95E-02 | -0.5877   | 0.2741   | 8.01E-01 | -0.0682 | 0.2689 |
| 18:68843062 | rs7243799   | C | T | 0.82 | 7.52E-05 | 0.9829  | 0.2317 | 3.70E-02 | -0.5780   | 0.2657   | 8.47E-01 | -0.0506 | 0.2617 |
| 18:68844408 | rs9949570   | A | G | 0.59 | 9.75E-05 | 0.6517  | 0.1565 | 1.21E-03 | -0.7165   | 0.2198   | 5.93E-01 | -0.0942 | 0.1755 |
| 18:68845592 | rs4524030   | G | A | 0.51 | 5.98E-05 | -0.7510 | 0.1743 | 1.20E-03 | 0.7851    | 0.2415   | 4.42E-01 | 0.1522  | 0.1966 |
| 18:69018071 | rs9947008   | T | C | 0.79 | 7.92E-05 | 0.9889  | 0.2340 | 3.90E-02 | -0.5900   | 0.2752   | 5.22E-01 | -0.1696 | 0.2631 |

|             |             |   |   |      |          |         |        |          |         |        |          |         |        |
|-------------|-------------|---|---|------|----------|---------|--------|----------|---------|--------|----------|---------|--------|
| 18:69030842 | rs17084304  | C | T | 0.79 | 9.56E-05 | 0.9797  | 0.2349 | 3.63E-02 | -0.5980 | 0.2748 | 5.20E-01 | -0.1704 | 0.2633 |
| 18:69039235 | rs28470346  | T | C | 0.81 | 2.34E-05 | 1.0489  | 0.2291 | 1.61E-01 | -0.4258 | 0.2999 | 3.16E-01 | -0.2645 | 0.2616 |
| 18:70372800 | rs9948999   | C | A | 0.86 | 4.64E-02 | -0.6006 | 0.2969 | 1.07E-01 | 0.6371  | 0.4023 | 9.92E-05 | 1.1070  | 0.2644 |
| 18:70383839 | rs55959329  | A | G | 0.87 | 7.14E-02 | -0.5405 | 0.2960 | 1.12E-01 | 0.6185  | 0.3973 | 9.38E-05 | 1.1001  | 0.2617 |
| 18:70384025 | rs55889413  | A | G | 0.87 | 7.14E-02 | -0.5404 | 0.2961 | 1.12E-01 | 0.6185  | 0.3973 | 9.42E-05 | 1.1000  | 0.2618 |
| 18:70384421 | rs4892033   | T | C | 0.87 | 7.14E-02 | -0.5407 | 0.2962 | 1.12E-01 | 0.6184  | 0.3974 | 9.48E-05 | 1.1001  | 0.2619 |
| 18:70388163 | rs57516430  | C | T | 0.87 | 9.33E-02 | -0.5122 | 0.3020 | 1.19E-01 | 0.6113  | 0.4007 | 9.37E-05 | 1.1181  | 0.2660 |
| 18:71116340 | rs7241104   | C | T | 0.91 | 5.59E-01 | 0.2069  | 0.3539 | 9.24E-05 | 2.1369  | 0.6183 | 9.07E-01 | -0.0411 | 0.3489 |
| 18:71117075 | rs74874796  | T | C | 0.91 | 5.54E-01 | 0.2098  | 0.3543 | 9.27E-05 | 2.1368  | 0.6184 | 9.03E-01 | -0.0427 | 0.3494 |
| 18:71117231 | rs76604675  | C | T | 0.91 | 5.53E-01 | 0.2101  | 0.3543 | 9.27E-05 | 2.1368  | 0.6184 | 9.03E-01 | -0.0426 | 0.3494 |
| 18:71117387 | rs113838898 | A | G | 0.91 | 5.51E-01 | 0.2114  | 0.3545 | 9.27E-05 | 2.1366  | 0.6183 | 9.02E-01 | -0.0434 | 0.3496 |
| 18:71117660 | rs77516206  | A | G | 0.91 | 5.50E-01 | 0.2120  | 0.3546 | 9.34E-05 | 2.1355  | 0.6182 | 9.02E-01 | -0.0433 | 0.3497 |
| 18:71119741 | rs17824575  | T | A | 0.91 | 5.37E-01 | 0.2196  | 0.3556 | 9.35E-05 | 2.1353  | 0.6181 | 8.96E-01 | -0.0458 | 0.3507 |
| 18:72074817 | rs4892205   | T | G | 0.77 | 1.61E-05 | 1.0418  | 0.2224 | 4.95E-01 | -0.2384 | 0.3519 | 1.97E-01 | -0.3316 | 0.2541 |
| 18:72076466 | rs35183655  | I | R | 0.77 | 2.30E-05 | 1.0019  | 0.2186 | 5.09E-01 | -0.2269 | 0.3465 | 1.71E-01 | -0.3438 | 0.2478 |
| 18:72076567 | rs9955537   | C | T | 0.77 | 2.42E-05 | 0.9787  | 0.2142 | 4.96E-01 | -0.2287 | 0.3385 | 1.46E-01 | -0.3572 | 0.2421 |
| 18:72077557 | rs9319904   | C | T | 0.74 | 1.29E-05 | 1.0599  | 0.2233 | 9.93E-02 | -0.6145 | 0.3691 | 1.99E-01 | -0.3327 | 0.2561 |
| 19:22764872 | rs74538802  | G | A | 0.95 | 3.50E-01 | 0.3588  | 0.3834 | 8.33E-05 | -1.0216 | 0.2143 | 2.52E-01 | -0.4348 | 0.3755 |
| 19:2818547  | rs551489473 | R | I | 0.81 | 2.52E-03 | -0.9355 | 0.2979 | 1.08E-01 | 0.6370  | 0.4016 | 8.57E-05 | 1.1717  | 0.2770 |
| 19:29122756 | rs59404768  | T | C | 0.77 | 1.37E-02 | -0.5910 | 0.2338 | 3.23E-01 | 0.2970  | 0.3004 | 5.42E-05 | 0.9167  | 0.2100 |
| 19:33538297 | rs16967749  | C | T | 0.89 | 5.06E-05 | -1.1857 | 0.2721 | 8.36E-02 | 0.8248  | 0.5016 | 9.31E-02 | 0.5155  | 0.3018 |
| 19:33538342 | rs34363498  | G | A | 0.88 | 9.37E-05 | -1.1515 | 0.2757 | 9.22E-02 | 0.7928  | 0.4927 | 1.68E-01 | 0.4265  | 0.3051 |
| 19:33540687 | rs34621377  | C | A | 0.91 | 5.32E-05 | -1.3054 | 0.3006 | 9.29E-03 | 1.5630  | 0.6911 | 1.67E-01 | 0.4697  | 0.3358 |
| 19:33544041 | rs34475253  | C | G | 0.90 | 2.51E-05 | -1.3458 | 0.2952 | 7.87E-03 | 1.6031  | 0.6949 | 1.51E-01 | 0.4860  | 0.3336 |
| 19:33545042 | rs12462348  | C | T | 0.89 | 4.09E-05 | -1.3106 | 0.2966 | 9.60E-03 | 1.5276  | 0.6660 | 2.00E-01 | 0.4326  | 0.3336 |
| 19:33545881 | rs12462935  | C | T | 0.90 | 2.94E-05 | -1.3230 | 0.2931 | 9.06E-03 | 1.5391  | 0.6684 | 2.05E-01 | 0.4255  | 0.3316 |
| 19:33547003 | rs573316854 | R | I | 0.89 | 3.14E-05 | -1.3036 | 0.2900 | 8.91E-03 | 1.5396  | 0.6676 | 2.25E-01 | 0.4023  | 0.3282 |
| 19:33548203 | rs12983403  | C | G | 0.89 | 4.96E-05 | -1.2808 | 0.2936 | 9.00E-03 | 1.5170  | 0.6543 | 2.36E-01 | 0.3948  | 0.3298 |
| 19:33552417 | rs35913518  | T | G | 0.90 | 4.39E-05 | -1.3043 | 0.2965 | 7.88E-03 | 1.5749  | 0.6728 | 2.07E-01 | 0.4258  | 0.3333 |
| 19:33556670 | rs12459968  | T | A | 0.90 | 2.20E-05 | -1.4490 | 0.3153 | 7.23E-03 | 1.6836  | 0.7118 | 1.97E-01 | 0.4675  | 0.3583 |
| 19:33559874 | rs60203782  | G | T | 0.89 | 6.83E-05 | -1.2464 | 0.2919 | 9.08E-03 | 1.4894  | 0.6410 | 2.67E-01 | 0.3664  | 0.3267 |
| 19:33562015 | rs71176190  | R | I | 0.89 | 9.08E-05 | -1.2333 | 0.2946 | 8.35E-03 | 1.4993  | 0.6376 | 3.25E-01 | 0.3265  | 0.3289 |
| 19:33562695 | rs60197880  | C | A | 0.89 | 9.36E-05 | -1.2176 | 0.2915 | 8.65E-03 | 1.4835  | 0.6342 | 3.15E-01 | 0.3297  | 0.3251 |
| 19:33562700 | rs28661618  | T | G | 0.89 | 8.38E-05 | -1.2169 | 0.2890 | 1.80E-01 | -0.5135 | 0.3698 | 8.53E-01 | -0.0615 | 0.3296 |

|             |             |   |   |      |          |         |        |          |         |         |          |         |        |
|-------------|-------------|---|---|------|----------|---------|--------|----------|---------|---------|----------|---------|--------|
| 19:33562757 | rs34154013  | G | A | 0.89 | 9.42E-05 | -1.2167 | 0.2914 | 8.66E-03 | 1.4827  | 0.6339  | 3.16E-01 | 0.3290  | 0.3250 |
| 19:33564874 | rs34266236  | C | A | 0.89 | 9.77E-05 | -1.2116 | 0.2909 | 8.72E-03 | 1.4768  | 0.6317  | 3.20E-01 | 0.3254  | 0.3243 |
| 19:38992852 | rs77022898  | C | T | 0.94 | 4.33E-01 | -0.3404 | 0.4338 | 3.53E-05 | 6.3624  | 5.2101  | 1.55E-01 | 0.6073  | 0.4212 |
| 19:38998771 | rs77696417  | A | G | 0.94 | 4.36E-01 | -0.3346 | 0.4293 | 3.12E-05 | 6.9007  | 6.4646  | 1.54E-01 | 0.6016  | 0.4168 |
| 19:39007210 | rs115308402 | A | C | 0.94 | 4.18E-01 | -0.3467 | 0.4277 | 2.75E-05 | 5.8395  | 3.8946  | 1.36E-01 | 0.6271  | 0.4147 |
| 19:39011141 | rs150685379 | C | G | 0.95 | 2.78E-01 | -0.4931 | 0.4528 | 7.88E-05 | 13.5108 | 27.0109 | 2.67E-01 | 0.4991  | 0.4450 |
| 19:39030035 | rs115404685 | T | C | 0.94 | 2.92E-01 | -0.4845 | 0.4589 | 8.58E-05 | 10.9728 | 18.2850 | 2.51E-01 | 0.5224  | 0.4503 |
| 19:39031714 | rs115755496 | G | A | 0.95 | 2.90E-01 | -0.4868 | 0.4589 | 7.65E-05 | 16.7269 | 32.6600 | 2.48E-01 | 0.5252  | 0.4503 |
| 19:39036416 | rs116072693 | A | C | 0.95 | 2.95E-01 | -0.4852 | 0.4616 | 7.26E-05 | 18.3750 | 31.2175 | 2.40E-01 | 0.5374  | 0.4527 |
| 19:39037276 | rs115019209 | G | A | 0.95 | 3.04E-01 | -0.4780 | 0.4640 | 9.08E-05 | 9.6093  | 11.8363 | 2.35E-01 | 0.5462  | 0.4548 |
| 19:39398631 | rs3136644   | A | G | 0.77 | 7.20E-07 | -1.1388 | 0.2057 | 4.70E-02 | 0.7984  | 0.4240  | 6.08E-01 | 0.1293  | 0.2509 |
| 19:39398649 | rs3136645   | T | C | 0.77 | 3.79E-06 | -1.0441 | 0.2053 | 5.76E-02 | 0.7604  | 0.4231  | 7.08E-01 | 0.0918  | 0.2436 |
| 19:39403637 | rs12462170  | T | G | 0.80 | 1.07E-05 | -1.0265 | 0.2140 | 8.09E-02 | 0.6905  | 0.4172  | 9.21E-01 | 0.0250  | 0.2497 |
| 19:39407775 | rs10415194  | A | C | 0.77 | 2.87E-05 | -0.9053 | 0.2003 | 3.30E-01 | 0.3074  | 0.3201  | 7.56E-01 | -0.0718 | 0.2297 |
| 19:39410986 | rs12460327  | C | G | 0.77 | 1.55E-05 | -0.9366 | 0.1995 | 3.96E-01 | 0.2665  | 0.3174  | 8.39E-01 | -0.0473 | 0.2314 |
| 19:39411576 | rs28736288  | T | G | 0.77 | 2.90E-05 | -0.9037 | 0.2000 | 3.15E-01 | 0.3174  | 0.3203  | 8.14E-01 | -0.0543 | 0.2295 |
| 19:39411588 | rs201362509 | C | G | 0.76 | 4.87E-05 | -0.8985 | 0.2057 | 3.40E-01 | 0.3093  | 0.3279  | 7.25E-01 | -0.0828 | 0.2338 |
| 19:39411590 | rs111212157 | C | T | 0.76 | 4.87E-05 | -0.8985 | 0.2057 | 3.40E-01 | 0.3094  | 0.3279  | 7.26E-01 | -0.0823 | 0.2338 |
| 19:39411610 | rs200119729 | G | C | 0.77 | 3.36E-05 | -0.8951 | 0.2000 | 3.30E-01 | 0.3054  | 0.3176  | 8.47E-01 | -0.0444 | 0.2290 |
| 19:39412445 | rs10412886  | G | A | 0.77 | 1.64E-05 | -0.9336 | 0.1995 | 3.80E-01 | 0.2752  | 0.3173  | 8.99E-01 | -0.0295 | 0.2312 |
| 19:39412756 | rs539687857 | R | I | 0.79 | 1.38E-05 | -1.0225 | 0.2163 | 1.99E-01 | 0.4466  | 0.3551  | 9.59E-01 | -0.0130 | 0.2514 |
| 19:39414654 | rs28375245  | C | T | 0.77 | 3.34E-05 | -0.8943 | 0.1998 | 2.97E-01 | 0.3283  | 0.3185  | 9.13E-01 | -0.0251 | 0.2287 |
| 19:39414771 | rs112360575 | R | I | 0.79 | 4.40E-05 | -0.9415 | 0.2141 | 2.23E-01 | 0.4325  | 0.3585  | 7.82E-01 | -0.0677 | 0.2439 |
| 19:39416409 | rs751941    | G | A | 0.76 | 2.03E-05 | -0.9173 | 0.1986 | 3.58E-01 | 0.2860  | 0.3139  | 9.88E-01 | 0.0035  | 0.2294 |
| 19:39420194 | rs11882588  | C | T | 0.77 | 5.56E-05 | -0.8840 | 0.2042 | 2.75E-01 | 0.3603  | 0.3373  | 7.86E-01 | 0.0632  | 0.2317 |
| 19:39424421 | rs10410176  | G | A | 0.80 | 2.97E-05 | -0.9624 | 0.2134 | 4.30E-01 | 0.2476  | 0.3177  | 7.68E-01 | 0.0725  | 0.2446 |
| 19:39427860 | rs2116854   | C | T | 0.80 | 2.98E-05 | -0.9686 | 0.2148 | 4.38E-01 | 0.2455  | 0.3204  | 7.60E-01 | 0.0757  | 0.2462 |
| 19:39427886 | rs2116855   | T | C | 0.80 | 2.98E-05 | -0.9688 | 0.2148 | 4.39E-01 | 0.2451  | 0.3204  | 7.59E-01 | 0.0761  | 0.2463 |
| 19:39430902 | rs10407879  | A | G | 0.80 | 3.13E-05 | -0.9715 | 0.2161 | 4.47E-01 | 0.2420  | 0.3221  | 7.55E-01 | 0.0777  | 0.2475 |
| 19:39431374 | rs111827352 | R | D | 0.80 | 3.07E-05 | -0.9731 | 0.2162 | 4.53E-01 | 0.2384  | 0.3215  | 7.42E-01 | 0.0819  | 0.2477 |
| 19:39432136 | rs1134180   | G | A | 0.80 | 3.10E-05 | -0.9741 | 0.2165 | 4.55E-01 | 0.2376  | 0.3221  | 7.41E-01 | 0.0825  | 0.2481 |
| 19:46776156 | rs12971298  | G | T | 0.70 | 4.04E-01 | -0.2173 | 0.2600 | 4.70E-01 | 0.2281  | 0.3261  | 6.68E-06 | 1.0665  | 0.2150 |
| 19:53297017 | rs377034734 | D | R | 0.63 | 5.03E-05 | -1.1224 | 0.2575 | 1.17E-01 | 0.6794  | 0.4329  | 1.85E-01 | 0.3869  | 0.2883 |
| 1:150170113 | rs144581493 | G | T | 0.94 | 5.77E-05 | -1.6241 | 0.3760 | 2.66E-01 | 0.7560  | 0.7363  | 3.17E-02 | 0.9019  | 0.4096 |

|             |             |   |   |      |          |         |        |          |         |        |          |         |        |
|-------------|-------------|---|---|------|----------|---------|--------|----------|---------|--------|----------|---------|--------|
| 1:152186042 | rs12751022  | A | G | 0.60 | 3.51E-02 | -0.4793 | 0.2234 | 7.46E-05 | 1.0302  | 0.2620 | 1.04E-01 | 0.3685  | 0.2232 |
| 1:152186178 | rs4845748   | C | T | 0.41 | 3.38E-01 | 0.2206  | 0.2297 | 3.43E-05 | -1.0249 | 0.2522 | 3.00E-01 | -0.2359 | 0.2255 |
| 1:152301221 | rs1933063   | G | A | 0.88 | 2.73E-01 | 0.3874  | 0.3525 | 9.31E-05 | -1.3385 | 0.3279 | 9.19E-01 | 0.0359  | 0.3503 |
| 1:161269835 | rs143159974 | R | D | 0.83 | 4.79E-05 | 1.3642  | 0.3120 | 8.64E-02 | -0.7270 | 0.4118 | 3.01E-01 | -0.3673 | 0.3517 |
| 1:171788216 | N/A         | R | D | 0.79 | 5.95E-05 | -0.9535 | 0.2212 | 8.14E-02 | 0.6010  | 0.3601 | 5.66E-01 | 0.1443  | 0.2502 |
| 1:191204765 | rs71637267  | C | A | 0.93 | 2.42E-01 | 0.5089  | 0.4327 | 4.40E-02 | -0.9575 | 0.4614 | 9.23E-05 | -1.5829 | 0.3762 |
| 1:191241015 | rs12744441  | G | T | 0.93 | 3.33E-01 | 0.4176  | 0.4300 | 4.73E-02 | -0.9390 | 0.4601 | 7.53E-05 | -1.5841 | 0.3711 |
| 1:201690200 | rs12058357  | T | A | 0.83 | 9.43E-03 | -0.6759 | 0.2532 | 9.40E-05 | 1.3775  | 0.3731 | 5.81E-02 | 0.4950  | 0.2559 |
| 1:201698200 | rs12565521  | C | G | 0.83 | 1.07E-02 | -0.6713 | 0.2561 | 9.15E-05 | 1.3838  | 0.3742 | 7.41E-02 | 0.4717  | 0.2593 |
| 1:201698751 | rs61821710  | G | T | 0.83 | 1.07E-02 | -0.6714 | 0.2560 | 9.17E-05 | 1.3830  | 0.3740 | 7.41E-02 | 0.4718  | 0.2592 |
| 1:201698890 | rs61821711  | C | T | 0.83 | 9.61E-03 | -0.6693 | 0.2513 | 8.46E-05 | 1.3840  | 0.3731 | 5.78E-02 | 0.4918  | 0.2540 |
| 1:201699454 | rs12058481  | G | A | 0.83 | 9.53E-03 | -0.6696 | 0.2512 | 8.48E-05 | 1.3831  | 0.3730 | 5.77E-02 | 0.4918  | 0.2539 |
| 1:209261228 | rs60731826  | C | T | 0.65 | 1.33E-01 | 0.3611  | 0.2384 | 1.80E-02 | -0.6146 | 0.2629 | 9.38E-06 | -0.9781 | 0.2010 |
| 1:209729572 | rs66672103  | D | R | 0.77 | 7.66E-01 | -0.0767 | 0.2585 | 1.45E-01 | 0.4574  | 0.3312 | 1.63E-05 | 1.0164  | 0.2158 |
| 1:209729824 | rs9429996   | T | A | 0.77 | 7.67E-01 | -0.0765 | 0.2581 | 1.45E-01 | 0.4566  | 0.3309 | 1.60E-05 | 1.0157  | 0.2154 |
| 1:211414012 | rs10863882  | G | T | 0.54 | 9.14E-05 | -0.7043 | 0.1683 | 3.83E-01 | 0.2078  | 0.2368 | 1.03E-01 | 0.3069  | 0.1851 |
| 1:228829657 | rs12028277  | T | C | 0.71 | 7.13E-05 | 0.8802  | 0.2067 | 8.98E-01 | 0.0371  | 0.2782 | 3.50E-01 | -0.2185 | 0.2320 |
| 1:228836000 | rs12728864  | G | A | 0.90 | 9.20E-05 | -1.2967 | 0.3100 | 7.11E-01 | 0.2067  | 0.5628 | 1.87E-01 | 0.4593  | 0.3437 |
| 1:228837451 | rs6426512   | T | C | 0.90 | 9.40E-05 | -1.2939 | 0.3098 | 7.12E-01 | 0.2053  | 0.5619 | 1.88E-01 | 0.4577  | 0.3434 |
| 1:228846879 | rs375374820 | A | C | 0.90 | 9.34E-05 | -1.3087 | 0.3132 | 7.45E-01 | 0.1821  | 0.5627 | 1.92E-01 | 0.4586  | 0.3473 |
| 1:228852494 | rs11270267  | R | I | 0.93 | 4.68E-01 | -0.2822 | 0.3890 | 4.05E-01 | -0.3279 | 0.3791 | 8.92E-01 | -0.0525 | 0.3842 |
| 1:228854138 | rs72750042  | T | C | 0.75 | 2.91E-05 | 0.8944  | 0.1980 | 7.10E-01 | 0.1086  | 0.2806 | 1.67E-01 | -0.3128 | 0.2235 |
| 1:228860072 | rs11587994  | A | C | 0.75 | 2.98E-05 | 0.8977  | 0.1991 | 7.10E-01 | 0.1090  | 0.2822 | 1.73E-01 | -0.3102 | 0.2247 |
| 1:228862269 | rs56221905  | A | C | 0.75 | 3.03E-05 | 0.8986  | 0.1995 | 7.11E-01 | 0.1090  | 0.2828 | 1.75E-01 | -0.3091 | 0.2251 |
| 1:228865663 | rs55730631  | C | A | 0.76 | 2.96E-05 | 0.8994  | 0.1993 | 7.32E-01 | 0.1005  | 0.2827 | 1.83E-01 | -0.3034 | 0.2252 |
| 1:228867648 | rs72751907  | C | T | 0.76 | 2.76E-05 | 0.9044  | 0.1996 | 7.72E-01 | 0.0852  | 0.2832 | 1.92E-01 | -0.2983 | 0.2259 |
| 1:228868477 | rs6701241   | C | G | 0.74 | 5.72E-05 | 0.8538  | 0.1976 | 8.07E-01 | 0.0695  | 0.2755 | 3.21E-01 | -0.2225 | 0.2223 |
| 1:228868574 | rs6665334   | A | C | 0.76 | 2.64E-05 | 0.9075  | 0.1997 | 8.03E-01 | 0.0736  | 0.2835 | 1.99E-01 | -0.2939 | 0.2263 |
| 1:228870372 | rs151192724 | R | I | 0.76 | 2.60E-05 | 0.9085  | 0.1997 | 8.18E-01 | 0.0678  | 0.2836 | 2.03E-01 | -0.2915 | 0.2264 |
| 1:228870697 | rs3840437   | R | I | 0.76 | 2.59E-05 | 0.9088  | 0.1998 | 8.21E-01 | 0.0668  | 0.2837 | 2.04E-01 | -0.2912 | 0.2265 |
| 1:228871693 | rs3738073   | C | T | 0.76 | 2.57E-05 | 0.9092  | 0.1997 | 8.31E-01 | 0.0631  | 0.2836 | 2.06E-01 | -0.2897 | 0.2265 |
| 1:228872549 | rs55956922  | T | A | 0.76 | 2.54E-05 | 0.9097  | 0.1997 | 8.41E-01 | 0.0592  | 0.2836 | 2.09E-01 | -0.2880 | 0.2266 |
| 1:228872580 | rs60203629  | R | I | 0.76 | 2.52E-05 | 0.9109  | 0.1999 | 8.45E-01 | 0.0577  | 0.2838 | 2.10E-01 | -0.2876 | 0.2268 |
| 1:228878193 | rs17352654  | T | C | 0.76 | 2.45E-05 | 0.9103  | 0.1994 | 9.51E-01 | 0.0180  | 0.2833 | 2.39E-01 | -0.2700 | 0.2267 |

|             |             |   |   |      |          |         |        |          |          |          |          |         |        |
|-------------|-------------|---|---|------|----------|---------|--------|----------|----------|----------|----------|---------|--------|
| 1:228878481 | rs4391638   | A | C | 0.76 | 2.45E-05 | 0.9102  | 0.1994 | 9.58E-01 | 0.0155   | 0.2833   | 2.41E-01 | -0.2689 | 0.2267 |
| 1:228878663 | rs4641285   | G | A | 0.76 | 2.46E-05 | 0.9097  | 0.1993 | 9.61E-01 | 0.0143   | 0.2832   | 2.42E-01 | -0.2679 | 0.2267 |
| 1:228878669 | rs4993975   | A | C | 0.76 | 2.46E-05 | 0.9097  | 0.1993 | 9.62E-01 | 0.0140   | 0.2832   | 2.42E-01 | -0.2678 | 0.2266 |
| 1:228878871 | rs41270187  | T | C | 0.74 | 5.49E-05 | 0.8530  | 0.1969 | 9.75E-01 | 0.0090   | 0.2746   | 3.96E-01 | -0.1898 | 0.2221 |
| 1:228878888 | rs41270189  | C | T | 0.76 | 2.46E-05 | 0.9095  | 0.1993 | 9.67E-01 | 0.0121   | 0.2832   | 2.44E-01 | -0.2669 | 0.2266 |
| 1:228880021 | rs1062060   | C | T | 0.76 | 2.47E-05 | 0.9092  | 0.1992 | 9.75E-01 | 0.0091   | 0.2831   | 2.46E-01 | -0.2654 | 0.2266 |
| 1:228880098 | rs11578216  | T | A | 0.76 | 2.47E-05 | 0.9088  | 0.1992 | 9.74E-01 | 0.0097   | 0.2829   | 2.46E-01 | -0.2653 | 0.2265 |
| 1:228880135 | rs11593565  | C | T | 0.76 | 2.48E-05 | 0.9081  | 0.1991 | 9.71E-01 | 0.0108   | 0.2826   | 2.47E-01 | -0.2651 | 0.2264 |
| 1:228880296 | rs41271473  | G | A | 0.74 | 6.04E-05 | 0.8523  | 0.1979 | 9.65E-01 | 0.0125   | 0.2749   | 4.01E-01 | -0.1886 | 0.2230 |
| 1:228880466 | rs11580020  | G | A | 0.76 | 2.51E-05 | 0.9054  | 0.1986 | 9.59E-01 | 0.0149   | 0.2813   | 2.47E-01 | -0.2642 | 0.2259 |
| 1:228884358 | rs72751929  | A | G | 0.75 | 3.02E-05 | 0.8762  | 0.1945 | 8.65E-01 | 0.0482   | 0.2693   | 2.52E-01 | -0.2551 | 0.2205 |
| 1:228887129 | rs72751931  | G | T | 0.71 | 3.74E-07 | 0.9796  | 0.1716 | 6.43E-01 | -0.1218  | 0.2518   | 4.32E-01 | -0.1669 | 0.2109 |
| 1:228889664 | rs17352829  | A | G | 0.71 | 4.67E-07 | 0.9677  | 0.1713 | 6.55E-01 | -0.1165  | 0.2504   | 4.34E-01 | -0.1653 | 0.2097 |
| 1:228902278 | rs34575653  | R | D | 0.52 | 5.39E-05 | 0.7999  | 0.1844 | 5.62E-01 | -0.1442  | 0.2447   | 2.63E-01 | -0.2343 | 0.2071 |
| 1:228904726 | rs11587278  | G | T | 0.71 | 2.97E-05 | 0.8260  | 0.1831 | 5.32E-01 | -0.1567  | 0.2434   | 4.88E-01 | -0.1461 | 0.2092 |
| 1:228904822 | rs11585991  | T | C | 0.71 | 3.00E-05 | 0.8252  | 0.1831 | 5.31E-01 | -0.1572  | 0.2433   | 4.87E-01 | -0.1464 | 0.2091 |
| 1:228905135 | rs72751955  | A | C | 0.72 | 2.85E-05 | 0.8241  | 0.1822 | 5.46E-01 | -0.1510  | 0.2425   | 4.78E-01 | -0.1488 | 0.2083 |
| 1:228905750 | rs72751956  | C | A | 0.72 | 2.16E-05 | 0.8264  | 0.1796 | 5.57E-01 | -0.1457  | 0.2411   | 4.65E-01 | -0.1516 | 0.2062 |
| 1:228907291 | rs6663301   | T | G | 0.72 | 3.32E-05 | 0.8180  | 0.1826 | 5.34E-01 | -0.1552  | 0.2421   | 4.83E-01 | -0.1470 | 0.2083 |
| 1:228907432 | rs6696887   | C | T | 0.72 | 2.49E-05 | 0.8185  | 0.1795 | 5.56E-01 | -0.1457  | 0.2403   | 4.62E-01 | -0.1523 | 0.2056 |
| 1:228913267 | rs72751961  | C | T | 0.73 | 3.37E-05 | 0.7978  | 0.1783 | 5.58E-01 | -0.1435  | 0.2380   | 4.48E-01 | -0.1551 | 0.2031 |
| 1:228913361 | rs72751962  | G | A | 0.72 | 4.92E-05 | 0.7936  | 0.1818 | 5.38E-01 | -0.1519  | 0.2395   | 4.67E-01 | -0.1508 | 0.2059 |
| 1:228913490 | rs140855875 | R | D | 0.72 | 4.97E-05 | 0.7930  | 0.1818 | 5.38E-01 | -0.1519  | 0.2395   | 4.66E-01 | -0.1509 | 0.2058 |
| 1:228913562 | rs72751962  | G | T | 0.73 | 3.48E-05 | 0.7969  | 0.1785 | 5.59E-01 | -0.1430  | 0.2381   | 4.45E-01 | -0.1562 | 0.2032 |
| 1:228915602 | rs72754025  | C | T | 0.73 | 4.18E-05 | 0.7859  | 0.1781 | 5.55E-01 | -0.1438  | 0.2368   | 4.42E-01 | -0.1565 | 0.2021 |
| 1:228918113 | rs201035194 | G | A | 0.73 | 3.44E-05 | 0.8120  | 0.1817 | 5.24E-01 | -0.1589  | 0.2441   | 3.99E-01 | -0.1756 | 0.2067 |
| 1:230222924 | rs35941759  | C | A | 0.88 | 7.45E-02 | 0.6034  | 0.3342 | 1.19E-01 | -0.5887  | 0.3662   | 8.70E-05 | -1.2464 | 0.2950 |
| 1:37773846  | rs12564259  | C | T | 0.94 | 8.30E-01 | -0.0907 | 0.4221 | 6.72E-05 | 546.0910 | 340.4330 | 3.58E-01 | 0.3821  | 0.4121 |
| 1:37773854  | rs12564265  | C | T | 0.94 | 8.29E-01 | -0.0909 | 0.4222 | 6.09E-05 | 581.8000 | 369.7070 | 3.58E-01 | 0.3822  | 0.4122 |
| 1:37774702  | rs78431607  | G | A | 0.94 | 8.26E-01 | -0.0935 | 0.4251 | 9.28E-05 | 281.6210 | 185.6000 | 3.49E-01 | 0.3915  | 0.4150 |
| 1:37774935  | rs79047500  | G | T | 0.94 | 8.25E-01 | -0.0938 | 0.4254 | 9.25E-05 | 280.5200 | 186.0840 | 3.49E-01 | 0.3923  | 0.4152 |
| 1:37775795  | rs12564821  | C | T | 0.94 | 8.24E-01 | -0.0943 | 0.4259 | 8.91E-05 | 272.9890 | 184.8550 | 3.49E-01 | 0.3927  | 0.4157 |
| 1:37775871  | rs12564825  | C | G | 0.94 | 8.25E-01 | -0.0942 | 0.4260 | 8.91E-05 | 272.9880 | 184.8590 | 3.49E-01 | 0.3930  | 0.4157 |
| 1:37775982  | rs12562839  | G | A | 0.94 | 8.23E-01 | -0.0955 | 0.4283 | 8.99E-05 | 191.0610 | 126.2820 | 3.43E-01 | 0.3994  | 0.4180 |

|             |             |   |   |      |          |         |        |          |          |          |          |         |        |
|-------------|-------------|---|---|------|----------|---------|--------|----------|----------|----------|----------|---------|--------|
| 1:37776808  | rs80157204  | G | T | 0.95 | 6.24E-01 | -0.2242 | 0.4575 | 7.70E-05 | 158.0860 | 99.1530  | 3.01E-01 | 0.4665  | 0.4465 |
| 1:37777290  | rs56198153  | A | C | 0.95 | 6.21E-01 | -0.2254 | 0.4561 | 5.40E-05 | 162.3330 | 98.2534  | 3.00E-01 | 0.4653  | 0.4451 |
| 1:37778527  | rs75604453  | C | A | 0.95 | 6.16E-01 | -0.2293 | 0.4580 | 6.84E-05 | 125.0730 | 79.6297  | 2.95E-01 | 0.4724  | 0.4469 |
| 1:37778564  | rs75340595  | C | T | 0.95 | 6.16E-01 | -0.2296 | 0.4581 | 3.88E-05 | 158.8530 | 100.2190 | 2.94E-01 | 0.4731  | 0.4470 |
| 1:37778661  | rs1331335   | A | G | 0.95 | 6.16E-01 | -0.2297 | 0.4582 | 4.08E-05 | 153.1560 | 95.8240  | 2.95E-01 | 0.4731  | 0.4472 |
| 1:37778687  | rs1331334   | A | G | 0.95 | 6.15E-01 | -0.2314 | 0.4599 | 5.57E-05 | 123.2690 | 80.2458  | 2.90E-01 | 0.4792  | 0.4488 |
| 1:66863969  | rs55868520  | C | T | 0.78 | 5.60E-01 | -0.1434 | 0.2458 | 9.60E-05 | 1.1976   | 0.3257   | 1.54E-01 | 0.3438  | 0.2381 |
| 1:66864865  | rs11208846  | T | C | 0.78 | 5.58E-01 | -0.1440 | 0.2455 | 9.57E-05 | 1.1968   | 0.3255   | 1.54E-01 | 0.3434  | 0.2379 |
| 1:66866041  | rs11208847  | T | C | 0.78 | 5.55E-01 | -0.1465 | 0.2481 | 9.85E-05 | 1.2001   | 0.3268   | 1.48E-01 | 0.3519  | 0.2402 |
| 1:66877545  | rs11208853  | A | G | 0.78 | 5.36E-01 | -0.1504 | 0.2429 | 9.89E-05 | 1.1822   | 0.3224   | 1.59E-01 | 0.3358  | 0.2355 |
| 1:66886311  | rs35152634  | R | I | 0.78 | 5.18E-01 | -0.1556 | 0.2406 | 9.45E-05 | 1.1754   | 0.3200   | 1.63E-01 | 0.3298  | 0.2334 |
| 1:66889479  | rs11208859  | G | A | 0.78 | 5.26E-01 | -0.1525 | 0.2406 | 9.68E-05 | 1.1720   | 0.3194   | 1.61E-01 | 0.3315  | 0.2334 |
| 1:66891210  | rs12067979  | A | G | 0.78 | 5.33E-01 | -0.1500 | 0.2410 | 9.88E-05 | 1.1705   | 0.3193   | 1.58E-01 | 0.3342  | 0.2336 |
| 1:7520980   | rs1342480   | G | A | 0.69 | 5.39E-01 | -0.1240 | 0.2019 | 8.47E-01 | -0.0489  | 0.2490   | 9.82E-05 | 0.7296  | 0.1742 |
| 1:79062751  | rs1475735   | T | A | 0.68 | 4.31E-05 | 0.9319  | 0.2116 | 6.89E-01 | -0.1222  | 0.3050   | 1.27E-01 | -0.3659 | 0.2364 |
| 1:80037315  | rs7411157   | C | T | 0.65 | 1.67E-01 | 0.4724  | 0.3398 | 6.16E-05 | -1.6620  | 0.4194   | 2.41E-01 | -0.3974 | 0.3357 |
| 1:92628911  | rs545896679 | R | D | 0.53 | 5.50E-05 | -0.7463 | 0.1722 | 1.86E-03 | 0.7538   | 0.2440   | 2.95E-03 | 0.5620  | 0.1809 |
| 1:96316274  | rs4949973   | T | C | 0.89 | 1.16E-01 | -0.5032 | 0.3175 | 8.43E-03 | 1.2700   | 0.5210   | 9.12E-05 | 1.1736  | 0.2787 |
| 1:96332886  | rs12035636  | T | C | 0.89 | 1.14E-01 | -0.5074 | 0.3182 | 8.36E-03 | 1.2749   | 0.5223   | 9.14E-05 | 1.1763  | 0.2793 |
| 1:96333489  | rs61786499  | T | C | 0.89 | 1.01E-01 | -0.5325 | 0.3219 | 7.43E-03 | 1.3136   | 0.5319   | 6.46E-05 | 1.2137  | 0.2814 |
| 1:96337925  | rs12040559  | T | G | 0.89 | 1.11E-01 | -0.5225 | 0.3245 | 7.69E-03 | 1.3124   | 0.5336   | 6.91E-05 | 1.2178  | 0.2836 |
| 1:96344574  | rs12023633  | C | A | 0.89 | 1.02E-01 | -0.5309 | 0.3214 | 7.45E-03 | 1.3116   | 0.5312   | 6.72E-05 | 1.2094  | 0.2811 |
| 1:96350922  | rs12048190  | T | C | 0.89 | 9.96E-02 | -0.5358 | 0.3221 | 7.30E-03 | 1.3187   | 0.5330   | 6.35E-05 | 1.2161  | 0.2816 |
| 1:96360873  | rs61786503  | T | C | 0.89 | 9.91E-02 | -0.5388 | 0.3235 | 7.72E-03 | 1.3169   | 0.5367   | 6.82E-05 | 1.2168  | 0.2831 |
| 1:96361709  | rs12035421  | C | A | 0.89 | 9.89E-02 | -0.5391 | 0.3234 | 7.71E-03 | 1.3171   | 0.5367   | 6.81E-05 | 1.2165  | 0.2831 |
| 1:96368054  | rs61786505  | G | A | 0.89 | 9.89E-02 | -0.5369 | 0.3221 | 7.24E-03 | 1.3207   | 0.5332   | 6.40E-05 | 1.2155  | 0.2817 |
| 1:96377746  | rs11165516  | C | T | 0.89 | 1.08E-01 | -0.5181 | 0.3194 | 7.90E-03 | 1.2908   | 0.5253   | 8.48E-05 | 1.1863  | 0.2802 |
| 1:96468615  | rs10458509  | C | T | 0.88 | 5.85E-01 | -0.1810 | 0.3318 | 1.05E-02 | 1.2270   | 0.5138   | 7.43E-05 | 1.2161  | 0.2847 |
| 20:14399700 | rs6042722   | T | G | 0.87 | 9.39E-05 | 1.1428  | 0.2736 | 5.04E-01 | -0.2485  | 0.3643   | 9.67E-01 | -0.0127 | 0.3080 |
| 20:14414373 | rs6079437   | T | C | 0.86 | 7.06E-05 | 1.0959  | 0.2573 | 4.79E-01 | -0.2534  | 0.3500   | 9.24E-01 | -0.0277 | 0.2909 |
| 20:14416323 | rs79015429  | A | G | 0.87 | 8.61E-05 | 1.1346  | 0.2700 | 5.16E-01 | -0.2396  | 0.3611   | 9.89E-01 | -0.0041 | 0.3043 |
| 20:14422187 | rs4814306   | C | T | 0.85 | 7.16E-05 | 1.1192  | 0.2630 | 5.96E-01 | -0.1869  | 0.3463   | 9.54E-01 | 0.0171  | 0.2973 |
| 20:14432472 | rs73612355  | C | T | 0.84 | 6.60E-05 | 1.1154  | 0.2606 | 5.92E-01 | -0.1883  | 0.3451   | 9.67E-01 | 0.0124  | 0.2951 |
| 20:14454344 | rs6079458   | A | G | 0.85 | 8.76E-05 | 1.1327  | 0.2699 | 4.56E-01 | -0.2641  | 0.3471   | 9.42E-01 | 0.0223  | 0.3041 |

|             |             |   |   |      |          |         |        |          |         |        |          |         |        |
|-------------|-------------|---|---|------|----------|---------|--------|----------|---------|--------|----------|---------|--------|
| 20:14467217 | rs2145008   | G | A | 0.84 | 5.06E-05 | 1.1335  | 0.2601 | 1.84E-01 | -0.4405 | 0.3264 | 9.67E-01 | -0.0124 | 0.2958 |
| 20:14476048 | rs2327854   | A | G | 0.84 | 2.79E-05 | 1.1380  | 0.2513 | 1.67E-01 | -0.4437 | 0.3172 | 9.20E-01 | -0.0291 | 0.2886 |
| 20:14478215 | rs7269525   | C | T | 0.84 | 2.54E-05 | 1.1473  | 0.2519 | 1.61E-01 | -0.4514 | 0.3180 | 9.14E-01 | -0.0313 | 0.2898 |
| 20:14479730 | rs6079464   | C | T | 0.84 | 4.34E-05 | 1.1340  | 0.2577 | 1.48E-01 | -0.4695 | 0.3201 | 9.43E-01 | -0.0210 | 0.2937 |
| 20:14482770 | rs73612363  | G | A | 0.84 | 4.59E-05 | 1.1254  | 0.2566 | 1.48E-01 | -0.4669 | 0.3187 | 9.16E-01 | -0.0310 | 0.2923 |
| 20:14491658 | rs6074746   | A | G | 0.84 | 4.46E-05 | 1.1358  | 0.2585 | 1.42E-01 | -0.4761 | 0.3201 | 9.25E-01 | -0.0278 | 0.2946 |
| 20:14493800 | rs6079465   | G | T | 0.84 | 4.50E-05 | 1.1381  | 0.2592 | 1.41E-01 | -0.4784 | 0.3206 | 9.27E-01 | -0.0272 | 0.2953 |
| 20:14500103 | rs4813160   | T | C | 0.84 | 4.47E-05 | 1.1433  | 0.2603 | 1.39E-01 | -0.4830 | 0.3213 | 9.33E-01 | -0.0250 | 0.2966 |
| 20:14501598 | rs202009454 | R | I | 0.84 | 4.55E-05 | 1.1462  | 0.2612 | 1.37E-01 | -0.4856 | 0.3219 | 9.40E-01 | -0.0227 | 0.2976 |
| 20:14503474 | rs4814309   | G | C | 0.84 | 4.71E-05 | 1.1459  | 0.2618 | 1.39E-01 | -0.4845 | 0.3222 | 9.42E-01 | -0.0218 | 0.2980 |
| 20:14505942 | rs6074749   | C | A | 0.84 | 4.59E-05 | 1.1472  | 0.2616 | 1.37E-01 | -0.4872 | 0.3223 | 9.37E-01 | -0.0238 | 0.2980 |
| 20:3067254  | rs61138008  | C | T | 0.78 | 3.66E-06 | -1.5243 | 0.2992 | 1.86E-01 | 0.5933  | 0.4514 | 6.87E-04 | 1.1532  | 0.3212 |
| 20:36793529 | rs2076380   | G | A | 0.64 | 8.28E-06 | -0.9316 | 0.1913 | 4.15E-01 | 0.2291  | 0.2832 | 4.07E-02 | 0.4525  | 0.2161 |
| 20:49830783 | rs4811130   | C | T | 0.59 | 3.95E-01 | 0.2035  | 0.2387 | 5.64E-01 | -0.1602 | 0.2815 | 9.22E-05 | -0.8681 | 0.2063 |
| 20:52738421 | rs62214475  | T | C | 0.90 | 5.36E-05 | -1.1054 | 0.2547 | 9.87E-02 | 0.9189  | 0.6411 | 8.79E-02 | 0.4896  | 0.2820 |
| 20:52738555 | rs16998967  | T | A | 0.90 | 5.33E-05 | -1.1053 | 0.2546 | 9.86E-02 | 0.9192  | 0.6411 | 8.77E-02 | 0.4897  | 0.2819 |
| 20:6099593  | rs528959334 | R | D | 0.82 | 5.08E-02 | 0.5608  | 0.2829 | 5.75E-05 | -1.0437 | 0.2369 | 6.43E-02 | -0.5266 | 0.2791 |
| 21:23611869 | rs11911981  | G | A | 0.75 | 8.75E-01 | -0.0337 | 0.2148 | 3.98E-05 | 1.4004  | 0.3815 | 1.48E-02 | 0.5036  | 0.2004 |
| 22:17385750 | rs5748727   | A | T | 0.95 | 9.80E-01 | 0.0128  | 0.5013 | 9.39E-05 | -2.0878 | 0.4469 | 7.18E-01 | -0.1787 | 0.4923 |
| 22:22463325 | rs12172019  | G | C | 0.79 | 6.89E-03 | -0.7123 | 0.2557 | 1.30E-01 | 0.5133  | 0.3542 | 6.66E-05 | 1.0028  | 0.2330 |
| 22:22874320 | rs362044    | A | G | 0.63 | 7.41E-01 | 0.1039  | 0.3142 | 7.94E-05 | -1.3037 | 0.3292 | 6.76E-04 | -1.0038 | 0.2791 |
| 22:22874965 | rs362208    | G | A | 0.65 | 9.64E-01 | 0.0149  | 0.3296 | 7.57E-05 | -1.3590 | 0.3374 | 5.06E-04 | -1.0738 | 0.2911 |
| 22:28016683 | rs11702931  | C | T | 0.84 | 3.01E-02 | -0.5084 | 0.2300 | 2.19E-01 | 0.3837  | 0.3234 | 4.46E-05 | 0.8994  | 0.2034 |
| 22:28022026 | rs73162330  | G | A | 0.85 | 1.24E-01 | -0.3714 | 0.2395 | 2.61E-01 | 0.3548  | 0.3268 | 6.38E-05 | 0.9012  | 0.2088 |
| 22:34863375 | rs130578    | G | A | 0.81 | 5.11E-05 | 0.8874  | 0.2038 | 7.09E-01 | 0.1191  | 0.3078 | 5.29E-01 | -0.1464 | 0.2309 |
| 22:34863764 | rs130579    | C | T | 0.81 | 5.08E-05 | 0.8868  | 0.2036 | 7.10E-01 | 0.1188  | 0.3076 | 5.27E-01 | -0.1467 | 0.2307 |
| 22:34864558 | rs28971240  | A | C | 0.81 | 4.98E-05 | 0.8872  | 0.2034 | 7.12E-01 | 0.1178  | 0.3074 | 5.26E-01 | -0.1470 | 0.2306 |
| 22:34864692 | rs145660198 | I | R | 0.81 | 5.04E-05 | 0.8875  | 0.2036 | 7.11E-01 | 0.1182  | 0.3076 | 5.28E-01 | -0.1467 | 0.2308 |
| 22:34865011 | rs200139501 | I | R | 0.81 | 4.96E-05 | 0.8876  | 0.2034 | 7.13E-01 | 0.1174  | 0.3075 | 5.26E-01 | -0.1471 | 0.2306 |
| 22:34869196 | rs4423      | G | A | 0.81 | 5.95E-05 | 0.8783  | 0.2038 | 6.97E-01 | 0.1246  | 0.3081 | 5.29E-01 | -0.1458 | 0.2303 |
| 22:34869571 | rs130586    | C | A | 0.81 | 4.56E-05 | 0.8936  | 0.2037 | 7.12E-01 | 0.1180  | 0.3085 | 5.23E-01 | -0.1485 | 0.2312 |
| 22:34871008 | rs135163    | T | C | 0.81 | 5.02E-05 | 0.8850  | 0.2030 | 7.05E-01 | 0.1207  | 0.3072 | 5.24E-01 | -0.1475 | 0.2301 |
| 22:34871742 | rs130588    | G | T | 0.81 | 4.75E-05 | 0.8867  | 0.2027 | 7.15E-01 | 0.1163  | 0.3068 | 5.22E-01 | -0.1480 | 0.2299 |
| 22:34872806 | rs127301    | T | C | 0.81 | 4.72E-05 | 0.8873  | 0.2027 | 7.16E-01 | 0.1156  | 0.3068 | 5.22E-01 | -0.1482 | 0.2299 |

|             |             |   |   |      |          |        |        |          |        |        |          |         |        |
|-------------|-------------|---|---|------|----------|--------|--------|----------|--------|--------|----------|---------|--------|
| 22:34873663 | rs135165    | A | T | 0.81 | 4.69E-05 | 0.8873 | 0.2026 | 7.17E-01 | 0.1152 | 0.3067 | 5.22E-01 | -0.1483 | 0.2299 |
| 22:34874101 | rs130592    | T | G | 0.81 | 4.69E-05 | 0.8871 | 0.2026 | 7.17E-01 | 0.1154 | 0.3066 | 5.21E-01 | -0.1483 | 0.2298 |
| 22:34875943 | rs5994940   | A | G | 0.81 | 4.44E-05 | 0.8886 | 0.2022 | 7.27E-01 | 0.1108 | 0.3062 | 5.18E-01 | -0.1492 | 0.2296 |
| 22:34882064 | rs130694    | A | G | 0.81 | 4.16E-05 | 0.8904 | 0.2017 | 7.32E-01 | 0.1089 | 0.3059 | 5.16E-01 | -0.1499 | 0.2293 |
| 22:34882579 | rs130695    | A | G | 0.81 | 4.26E-05 | 0.8898 | 0.2019 | 7.30E-01 | 0.1095 | 0.3061 | 5.11E-01 | -0.1517 | 0.2294 |
| 22:34884877 | rs5755064   | C | G | 0.81 | 3.72E-05 | 0.8959 | 0.2015 | 7.42E-01 | 0.1048 | 0.3062 | 5.17E-01 | -0.1495 | 0.2295 |
| 22:34887270 | rs4424      | G | C | 0.81 | 4.01E-05 | 0.8906 | 0.2013 | 7.39E-01 | 0.1055 | 0.3053 | 5.13E-01 | -0.1507 | 0.2289 |
| 22:34889460 | rs130699    | A | C | 0.81 | 4.12E-05 | 0.8885 | 0.2012 | 7.43E-01 | 0.1040 | 0.3049 | 5.12E-01 | -0.1509 | 0.2287 |
| 22:34889516 | rs130700    | G | A | 0.81 | 4.12E-05 | 0.8887 | 0.2012 | 7.43E-01 | 0.1038 | 0.3050 | 5.12E-01 | -0.1508 | 0.2288 |
| 22:34889754 | rs130701    | T | C | 0.81 | 4.11E-05 | 0.8885 | 0.2012 | 7.43E-01 | 0.1038 | 0.3049 | 5.12E-01 | -0.1510 | 0.2287 |
| 22:34890899 | rs130703    | A | T | 0.81 | 4.07E-05 | 0.8888 | 0.2011 | 7.45E-01 | 0.1027 | 0.3048 | 5.11E-01 | -0.1511 | 0.2286 |
| 22:34893052 | rs130704    | A | G | 0.81 | 4.03E-05 | 0.8892 | 0.2010 | 7.47E-01 | 0.1019 | 0.3047 | 5.11E-01 | -0.1512 | 0.2286 |
| 22:34894283 | rs130706    | G | T | 0.81 | 4.03E-05 | 0.8892 | 0.2010 | 7.48E-01 | 0.1018 | 0.3047 | 5.11E-01 | -0.1512 | 0.2286 |
| 22:34894906 | rs9607147   | A | G | 0.81 | 4.03E-05 | 0.8892 | 0.2010 | 7.48E-01 | 0.1018 | 0.3047 | 5.11E-01 | -0.1512 | 0.2286 |
| 22:34896076 | rs112578268 | R | I | 0.81 | 4.03E-05 | 0.8892 | 0.2011 | 7.47E-01 | 0.1018 | 0.3047 | 5.11E-01 | -0.1511 | 0.2286 |
| 22:34896078 | rs112556622 | A | G | 0.81 | 4.04E-05 | 0.8892 | 0.2011 | 7.47E-01 | 0.1019 | 0.3048 | 5.11E-01 | -0.1513 | 0.2287 |
| 22:34896210 | rs73160354  | A | G | 0.81 | 4.03E-05 | 0.8892 | 0.2010 | 7.48E-01 | 0.1018 | 0.3047 | 5.11E-01 | -0.1512 | 0.2286 |
| 22:34896294 | rs535429597 | R | I | 0.81 | 4.06E-05 | 0.8897 | 0.2013 | 7.47E-01 | 0.1022 | 0.3050 | 5.13E-01 | -0.1507 | 0.2289 |
| 22:34896350 | rs115349747 | A | G | 0.83 | 3.13E-05 | 1.0084 | 0.2243 | 8.93E-01 | 0.0482 | 0.3423 | 3.72E-01 | -0.2296 | 0.2554 |
| 22:34896502 | rs111394994 | G | A | 0.81 | 3.89E-05 | 0.8970 | 0.2023 | 7.69E-01 | 0.0938 | 0.3068 | 5.11E-01 | -0.1524 | 0.2302 |
| 22:34896515 | rs556476384 | R | D | 0.86 | 5.85E-05 | 1.1092 | 0.2570 | 4.59E-01 | 0.3069 | 0.4006 | 8.76E-01 | -0.0457 | 0.2915 |
| 22:34896518 | rs375805256 | R | D | 0.86 | 5.85E-05 | 1.1092 | 0.2571 | 4.58E-01 | 0.3073 | 0.4007 | 8.76E-01 | -0.0459 | 0.2916 |
| 22:34898385 | rs2227030   | C | T | 0.81 | 4.01E-05 | 0.8892 | 0.2010 | 7.48E-01 | 0.1014 | 0.3047 | 5.11E-01 | -0.1513 | 0.2286 |
| 22:34898423 | rs9607149   | T | C | 0.84 | 9.14E-05 | 0.8980 | 0.2146 | 9.65E-01 | 0.0144 | 0.3230 | 4.49E-01 | -0.1835 | 0.2404 |
| 22:34899564 | rs2032464   | C | T | 0.81 | 4.02E-05 | 0.8895 | 0.2011 | 7.48E-01 | 0.1016 | 0.3049 | 5.11E-01 | -0.1514 | 0.2287 |
| 22:34901525 | rs5755071   | A | G | 0.81 | 3.88E-05 | 0.8913 | 0.2010 | 7.47E-01 | 0.1020 | 0.3050 | 5.10E-01 | -0.1515 | 0.2288 |
| 22:34902758 | rs130709    | T | G | 0.84 | 9.37E-05 | 0.8975 | 0.2149 | 9.61E-01 | 0.0161 | 0.3235 | 4.49E-01 | -0.1835 | 0.2406 |
| 22:34903306 | rs130710    | T | C | 0.81 | 4.15E-05 | 0.8893 | 0.2015 | 7.42E-01 | 0.1043 | 0.3054 | 5.11E-01 | -0.1516 | 0.2290 |
| 22:34904107 | rs130715    | G | T | 0.81 | 4.13E-05 | 0.8891 | 0.2013 | 7.43E-01 | 0.1037 | 0.3052 | 5.11E-01 | -0.1515 | 0.2289 |
| 22:34904220 | rs130716    | R | D | 0.81 | 4.13E-05 | 0.8891 | 0.2013 | 7.43E-01 | 0.1037 | 0.3052 | 5.11E-01 | -0.1515 | 0.2289 |
| 22:34904762 | rs73160361  | C | T | 0.81 | 4.29E-05 | 0.8873 | 0.2014 | 7.42E-01 | 0.1041 | 0.3052 | 5.10E-01 | -0.1516 | 0.2288 |
| 22:34905689 | rs130717    | A | T | 0.81 | 4.30E-05 | 0.8873 | 0.2015 | 7.42E-01 | 0.1041 | 0.3052 | 5.10E-01 | -0.1516 | 0.2289 |
| 22:34905776 | rs130718    | A | G | 0.81 | 4.30E-05 | 0.8873 | 0.2015 | 7.42E-01 | 0.1041 | 0.3052 | 5.10E-01 | -0.1516 | 0.2289 |
| 22:34906181 | rs5755072   | C | A | 0.81 | 4.31E-05 | 0.8872 | 0.2015 | 7.42E-01 | 0.1043 | 0.3052 | 5.10E-01 | -0.1516 | 0.2289 |

|             |            |   |   |      |          |        |        |          |         |        |          |         |        |
|-------------|------------|---|---|------|----------|--------|--------|----------|---------|--------|----------|---------|--------|
| 22:34906241 | rs130719   | A | G | 0.81 | 4.15E-05 | 0.8891 | 0.2014 | 7.43E-01 | 0.1040  | 0.3053 | 5.11E-01 | -0.1515 | 0.2289 |
| 22:34906816 | rs713568   | C | T | 0.81 | 4.32E-05 | 0.8872 | 0.2015 | 7.42E-01 | 0.1044  | 0.3052 | 5.10E-01 | -0.1516 | 0.2289 |
| 22:34906973 | rs19445    | C | T | 0.81 | 4.22E-05 | 0.8890 | 0.2016 | 7.43E-01 | 0.1040  | 0.3056 | 5.08E-01 | -0.1526 | 0.2291 |
| 22:34908053 | rs130720   | C | T | 0.81 | 4.29E-05 | 0.8874 | 0.2015 | 7.42E-01 | 0.1042  | 0.3052 | 5.10E-01 | -0.1516 | 0.2289 |
| 22:34909613 | rs4820149  | A | G | 0.81 | 3.95E-05 | 0.8909 | 0.2012 | 7.27E-01 | 0.1109  | 0.3058 | 5.10E-01 | -0.1517 | 0.2289 |
| 22:34910004 | rs130721   | R | D | 0.84 | 9.06E-05 | 0.8990 | 0.2147 | 9.42E-01 | 0.0241  | 0.3241 | 4.51E-01 | -0.1827 | 0.2406 |
| 22:34910847 | rs130722   | C | T | 0.81 | 4.30E-05 | 0.8874 | 0.2015 | 7.42E-01 | 0.1043  | 0.3052 | 5.10E-01 | -0.1517 | 0.2289 |
| 22:34911429 | rs130723   | T | C | 0.81 | 4.02E-05 | 0.8889 | 0.2009 | 7.26E-01 | 0.1108  | 0.3053 | 5.13E-01 | -0.1505 | 0.2285 |
| 22:34914352 | rs4592951  | C | T | 0.81 | 4.09E-05 | 0.8896 | 0.2013 | 7.44E-01 | 0.1034  | 0.3051 | 5.11E-01 | -0.1515 | 0.2289 |
| 22:34914969 | rs2179149  | G | C | 0.81 | 4.09E-05 | 0.8895 | 0.2013 | 7.44E-01 | 0.1035  | 0.3051 | 5.10E-01 | -0.1516 | 0.2289 |
| 22:34915292 | rs2413237  | C | T | 0.81 | 4.09E-05 | 0.8896 | 0.2013 | 7.45E-01 | 0.1032  | 0.3051 | 5.10E-01 | -0.1517 | 0.2289 |
| 22:34915547 | rs5749868  | A | G | 0.81 | 4.09E-05 | 0.8896 | 0.2013 | 7.45E-01 | 0.1032  | 0.3051 | 5.10E-01 | -0.1517 | 0.2289 |
| 22:34916665 | rs5999421  | C | A | 0.81 | 4.10E-05 | 0.8895 | 0.2013 | 7.44E-01 | 0.1033  | 0.3051 | 5.10E-01 | -0.1517 | 0.2289 |
| 22:34917698 | rs1985898  | A | G | 0.81 | 3.83E-05 | 0.8914 | 0.2009 | 7.30E-01 | 0.1092  | 0.3054 | 5.12E-01 | -0.1510 | 0.2286 |
| 22:34917744 | rs1985897  | G | A | 0.81 | 4.00E-05 | 0.8911 | 0.2014 | 7.44E-01 | 0.1035  | 0.3053 | 5.10E-01 | -0.1518 | 0.2290 |
| 22:34918333 | rs5755076  | C | T | 0.81 | 3.95E-05 | 0.8918 | 0.2014 | 7.44E-01 | 0.1036  | 0.3054 | 5.11E-01 | -0.1514 | 0.2291 |
| 22:34920698 | rs4820151  | C | T | 0.81 | 4.11E-05 | 0.8897 | 0.2014 | 7.43E-01 | 0.1037  | 0.3052 | 5.10E-01 | -0.1518 | 0.2290 |
| 22:34923409 | rs9621965  | A | G | 0.81 | 3.85E-05 | 0.8913 | 0.2009 | 7.29E-01 | 0.1098  | 0.3053 | 5.12E-01 | -0.1509 | 0.2287 |
| 22:34923678 | rs2064089  | A | G | 0.81 | 3.85E-05 | 0.8913 | 0.2009 | 7.29E-01 | 0.1098  | 0.3053 | 5.12E-01 | -0.1509 | 0.2287 |
| 22:34923959 | rs2064091  | G | C | 0.81 | 3.95E-05 | 0.8900 | 0.2010 | 7.29E-01 | 0.1097  | 0.3053 | 5.12E-01 | -0.1509 | 0.2286 |
| 22:34926457 | rs8135889  | A | G | 0.81 | 4.00E-05 | 0.8913 | 0.2014 | 7.43E-01 | 0.1038  | 0.3055 | 5.09E-01 | -0.1521 | 0.2291 |
| 22:34926540 | rs8136010  | A | G | 0.81 | 4.00E-05 | 0.8913 | 0.2014 | 7.43E-01 | 0.1038  | 0.3055 | 5.09E-01 | -0.1521 | 0.2291 |
| 22:34928548 | rs5755080  | T | C | 0.81 | 4.12E-05 | 0.8930 | 0.2022 | 7.47E-01 | 0.1025  | 0.3059 | 5.10E-01 | -0.1524 | 0.2299 |
| 22:34930216 | rs5749872  | A | G | 0.81 | 3.99E-05 | 0.8915 | 0.2015 | 7.43E-01 | 0.1038  | 0.3055 | 5.10E-01 | -0.1520 | 0.2291 |
| 22:34934832 | rs5845179  | I | R | 0.80 | 6.78E-05 | 0.8812 | 0.2063 | 7.30E-01 | 0.1089  | 0.3048 | 5.57E-01 | -0.1376 | 0.2327 |
| 22:34936420 | rs71322925 | I | R | 0.82 | 2.21E-05 | 0.9324 | 0.2029 | 9.58E-01 | -0.0169 | 0.3123 | 2.58E-01 | -0.2643 | 0.2314 |
| 22:34937276 | rs5749873  | T | A | 0.81 | 4.07E-05 | 0.8906 | 0.2015 | 7.43E-01 | 0.1038  | 0.3054 | 5.10E-01 | -0.1519 | 0.2291 |
| 22:34938045 | rs5994964  | A | C | 0.81 | 4.16E-05 | 0.8891 | 0.2014 | 7.45E-01 | 0.1030  | 0.3050 | 5.05E-01 | -0.1537 | 0.2289 |
| 22:34939063 | rs4621256  | C | G | 0.81 | 4.17E-05 | 0.8907 | 0.2018 | 7.38E-01 | 0.1061  | 0.3057 | 5.09E-01 | -0.1526 | 0.2294 |
| 22:34940082 | rs5999431  | A | G | 0.81 | 4.08E-05 | 0.8906 | 0.2015 | 7.43E-01 | 0.1039  | 0.3054 | 5.10E-01 | -0.1520 | 0.2291 |
| 22:34940942 | rs5755093  | G | T | 0.81 | 4.16E-05 | 0.8908 | 0.2018 | 7.37E-01 | 0.1064  | 0.3058 | 5.08E-01 | -0.1528 | 0.2294 |
| 22:34941576 | rs4821261  | C | T | 0.84 | 9.11E-05 | 0.8985 | 0.2147 | 9.61E-01 | 0.0160  | 0.3234 | 4.51E-01 | -0.1826 | 0.2405 |
| 22:34942090 | rs5755095  | T | C | 0.81 | 4.02E-05 | 0.8913 | 0.2015 | 7.43E-01 | 0.1041  | 0.3054 | 5.10E-01 | -0.1519 | 0.2291 |
| 22:34944156 | rs5755101  | C | A | 0.81 | 4.17E-05 | 0.8908 | 0.2019 | 7.37E-01 | 0.1065  | 0.3058 | 5.08E-01 | -0.1527 | 0.2294 |

|             |             |   |   |      |          |        |        |          |         |        |          |         |        |
|-------------|-------------|---|---|------|----------|--------|--------|----------|---------|--------|----------|---------|--------|
| 22:34944235 | rs5994965   | C | T | 0.81 | 4.08E-05 | 0.8905 | 0.2015 | 7.43E-01 | 0.1038  | 0.3054 | 5.10E-01 | -0.1519 | 0.2291 |
| 22:34944420 | rs5994966   | T | C | 0.81 | 4.12E-05 | 0.8902 | 0.2016 | 7.42E-01 | 0.1043  | 0.3055 | 5.10E-01 | -0.1518 | 0.2291 |
| 22:34945295 | rs5749877   | A | T | 0.81 | 4.09E-05 | 0.8905 | 0.2015 | 7.44E-01 | 0.1037  | 0.3054 | 5.10E-01 | -0.1520 | 0.2291 |
| 22:34945447 | rs5755102   | T | C | 0.81 | 4.09E-05 | 0.8905 | 0.2015 | 7.44E-01 | 0.1037  | 0.3054 | 5.10E-01 | -0.1520 | 0.2291 |
| 22:34945675 | rs56854366  | D | R | 0.77 | 3.89E-05 | 0.8879 | 0.2003 | 6.87E-01 | -0.1169 | 0.2857 | 2.07E-01 | -0.2880 | 0.2256 |
| 22:34948085 | rs58174594  | T | A | 0.80 | 4.79E-05 | 0.8853 | 0.2024 | 6.15E-01 | 0.1611  | 0.3092 | 7.43E-01 | -0.0760 | 0.2302 |
| 22:34951545 | rs5994969   | G | A | 0.81 | 4.12E-05 | 0.8901 | 0.2015 | 7.43E-01 | 0.1041  | 0.3054 | 5.10E-01 | -0.1521 | 0.2291 |
| 22:34955094 | rs5999438   | A | C | 0.80 | 6.85E-05 | 0.8802 | 0.2062 | 7.24E-01 | 0.1121  | 0.3066 | 5.46E-01 | -0.1413 | 0.2325 |
| 22:34955097 | rs5994972   | A | C | 0.80 | 6.84E-05 | 0.8802 | 0.2062 | 7.24E-01 | 0.1121  | 0.3066 | 5.46E-01 | -0.1413 | 0.2325 |
| 22:34955877 | rs7290415   | G | T | 0.81 | 4.05E-05 | 0.8904 | 0.2014 | 7.45E-01 | 0.1031  | 0.3052 | 5.10E-01 | -0.1520 | 0.2290 |
| 22:34956307 | rs6518871   | C | T | 0.81 | 4.10E-05 | 0.8904 | 0.2016 | 7.44E-01 | 0.1034  | 0.3055 | 5.10E-01 | -0.1520 | 0.2291 |
| 22:34956338 | rs67375911  | I | R | 0.81 | 4.04E-05 | 0.8906 | 0.2014 | 7.45E-01 | 0.1032  | 0.3052 | 5.09E-01 | -0.1521 | 0.2290 |
| 22:34957088 | rs2179150   | C | T | 0.81 | 4.10E-05 | 0.8900 | 0.2014 | 7.42E-01 | 0.1042  | 0.3053 | 5.11E-01 | -0.1516 | 0.2290 |
| 22:34959246 | rs742084    | T | C | 0.81 | 4.22E-05 | 0.8911 | 0.2021 | 7.35E-01 | 0.1075  | 0.3060 | 5.08E-01 | -0.1530 | 0.2296 |
| 22:34960675 | rs71322928  | D | R | 0.81 | 4.15E-05 | 0.8901 | 0.2016 | 7.39E-01 | 0.1053  | 0.3053 | 5.12E-01 | -0.1513 | 0.2292 |
| 22:34960988 | rs9619459   | G | A | 0.81 | 4.05E-05 | 0.8900 | 0.2013 | 7.44E-01 | 0.1033  | 0.3051 | 5.10E-01 | -0.1516 | 0.2289 |
| 22:34961453 | rs377057880 | I | R | 0.81 | 3.67E-05 | 0.8980 | 0.2018 | 7.91E-01 | 0.0844  | 0.3057 | 5.10E-01 | -0.1525 | 0.2298 |
| 22:34961850 | rs9607157   | A | C | 0.81 | 4.03E-05 | 0.8897 | 0.2012 | 7.45E-01 | 0.1029  | 0.3050 | 5.10E-01 | -0.1515 | 0.2288 |
| 22:34962139 | rs5755109   | G | A | 0.81 | 4.04E-05 | 0.8897 | 0.2012 | 7.45E-01 | 0.1029  | 0.3050 | 5.11E-01 | -0.1515 | 0.2288 |
| 22:34964097 | rs5999444   | C | T | 0.81 | 3.94E-05 | 0.8932 | 0.2017 | 7.45E-01 | 0.1032  | 0.3058 | 5.03E-01 | -0.1545 | 0.2294 |
| 22:34964955 | rs5749882   | G | A | 0.81 | 4.02E-05 | 0.8895 | 0.2011 | 7.47E-01 | 0.1021  | 0.3049 | 5.10E-01 | -0.1515 | 0.2287 |
| 22:34965192 | rs34127314  | I | R | 0.81 | 4.02E-05 | 0.8905 | 0.2013 | 7.45E-01 | 0.1030  | 0.3052 | 5.09E-01 | -0.1522 | 0.2289 |
| 22:34965213 | rs2205812   | T | C | 0.81 | 3.99E-05 | 0.8901 | 0.2011 | 7.48E-01 | 0.1017  | 0.3049 | 5.10E-01 | -0.1517 | 0.2287 |
| 22:34965261 | rs2205813   | C | G | 0.81 | 3.99E-05 | 0.8901 | 0.2011 | 7.48E-01 | 0.1017  | 0.3049 | 5.10E-01 | -0.1517 | 0.2287 |
| 22:34965486 | rs2205814   | C | T | 0.81 | 3.84E-05 | 0.8926 | 0.2012 | 7.47E-01 | 0.1021  | 0.3051 | 5.09E-01 | -0.1521 | 0.2290 |
| 22:34965893 | rs59875330  | I | R | 0.84 | 9.19E-05 | 0.8937 | 0.2137 | 9.44E-01 | 0.0232  | 0.3221 | 4.61E-01 | -0.1776 | 0.2394 |
| 22:34965995 | rs58702312  | I | R | 0.81 | 3.98E-05 | 0.8917 | 0.2014 | 7.31E-01 | 0.1087  | 0.3052 | 5.11E-01 | -0.1516 | 0.2291 |
| 22:34966012 | rs5749883   | A | G | 0.81 | 4.02E-05 | 0.8892 | 0.2010 | 7.48E-01 | 0.1016  | 0.3047 | 5.11E-01 | -0.1513 | 0.2286 |
| 22:34967282 | rs5994976   | C | T | 0.81 | 4.01E-05 | 0.8892 | 0.2010 | 7.48E-01 | 0.1015  | 0.3047 | 5.11E-01 | -0.1513 | 0.2286 |
| 22:34967585 | rs5994977   | T | A | 0.81 | 4.01E-05 | 0.8892 | 0.2010 | 7.48E-01 | 0.1014  | 0.3047 | 5.11E-01 | -0.1513 | 0.2286 |
| 22:34967969 | rs5755112   | G | A | 0.81 | 4.01E-05 | 0.8892 | 0.2010 | 7.48E-01 | 0.1014  | 0.3047 | 5.11E-01 | -0.1513 | 0.2286 |
| 22:34968166 | rs5755113   | T | G | 0.81 | 4.01E-05 | 0.8892 | 0.2010 | 7.48E-01 | 0.1014  | 0.3047 | 5.11E-01 | -0.1513 | 0.2286 |
| 22:34968614 | rs2205815   | G | A | 0.81 | 4.02E-05 | 0.8896 | 0.2011 | 7.46E-01 | 0.1023  | 0.3049 | 5.10E-01 | -0.1518 | 0.2287 |
| 22:34969269 | rs10775729  | C | T | 0.81 | 4.14E-05 | 0.8896 | 0.2015 | 7.41E-01 | 0.1045  | 0.3052 | 5.09E-01 | -0.1521 | 0.2290 |

|             |             |   |   |      |          |         |        |          |           |          |          |         |        |
|-------------|-------------|---|---|------|----------|---------|--------|----------|-----------|----------|----------|---------|--------|
| 22:34969816 | rs138087815 | I | R | 0.81 | 4.18E-05 | 0.8890  | 0.2015 | 7.46E-01 | 0.1026    | 0.3051   | 5.09E-01 | -0.1520 | 0.2290 |
| 22:34970357 | rs9607158   | T | A | 0.81 | 4.01E-05 | 0.8893  | 0.2010 | 7.48E-01 | 0.1016    | 0.3047   | 5.11E-01 | -0.1512 | 0.2286 |
| 22:34970840 | rs9610055   | T | A | 0.81 | 4.01E-05 | 0.8892  | 0.2010 | 7.48E-01 | 0.1015    | 0.3047   | 5.11E-01 | -0.1513 | 0.2286 |
| 22:34973064 | rs5999446   | C | T | 0.84 | 8.85E-05 | 0.8937  | 0.2131 | 9.51E-01 | 0.0202    | 0.3212   | 4.54E-01 | -0.1801 | 0.2389 |
| 22:34974578 | rs185270732 | A | G | 0.81 | 3.90E-05 | 0.8931  | 0.2015 | 7.47E-01 | 0.1021    | 0.3056   | 5.11E-01 | -0.1516 | 0.2293 |
| 22:34974757 | rs374396311 | T | A | 0.85 | 3.81E-05 | 0.9375  | 0.2112 | 9.19E-01 | 0.0332    | 0.3198   | 6.02E-01 | -0.1261 | 0.2407 |
| 22:34974758 | rs377279192 | A | T | 0.85 | 3.81E-05 | 0.9375  | 0.2112 | 9.19E-01 | 0.0332    | 0.3198   | 6.03E-01 | -0.1260 | 0.2407 |
| 22:34974959 | rs9607160   | T | A | 0.81 | 4.12E-05 | 0.8957  | 0.2028 | 7.58E-01 | 0.0981    | 0.3073   | 5.09E-01 | -0.1531 | 0.2305 |
| 22:34981629 | rs5749885   | C | T | 0.83 | 4.25E-05 | 0.8955  | 0.2032 | 8.04E-01 | 0.0785    | 0.3034   | 6.68E-01 | -0.0996 | 0.2313 |
| 22:43826818 | rs12628226  | C | A | 0.93 | 4.36E-02 | -0.6611 | 0.3224 | 1.01E-05 | 1037.5000 | 639.3740 | 3.81E-01 | 0.2884  | 0.3264 |
| 22:44725640 | rs66803227  | G | A | 0.53 | 6.70E-05 | 0.8057  | 0.1884 | 5.35E-01 | -0.1770   | 0.2866   | 5.50E-01 | -0.1277 | 0.2126 |
| 22:44741271 | rs7410782   | G | A | 0.53 | 6.33E-05 | 0.7926  | 0.1847 | 7.79E-01 | -0.0774   | 0.2823   | 3.78E-01 | -0.1845 | 0.2078 |
| 22:50776096 | rs564180957 | T | G | 0.73 | 3.41E-05 | 1.0692  | 0.2391 | 8.70E-01 | -0.0504   | 0.3149   | 7.41E-01 | -0.0908 | 0.2735 |
| 2:107794848 | rs10184143  | A | C | 0.61 | 1.56E-01 | -0.2677 | 0.1875 | 3.23E-03 | 0.6194    | 0.2079   | 2.43E-05 | 0.7368  | 0.1603 |
| 2:110265558 | rs9330310   | T | G | 0.46 | 5.36E-05 | 0.8705  | 0.2006 | 7.83E-03 | -0.6776   | 0.2463   | 1.47E-02 | -0.5441 | 0.2162 |
| 2:110273380 | rs9330311   | T | C | 0.56 | 4.61E-05 | -0.8953 | 0.2042 | 3.87E-03 | 0.7965    | 0.2623   | 2.88E-02 | 0.5001  | 0.2230 |
| 2:110283216 | rs12998808  | C | A | 0.56 | 7.40E-05 | -0.8396 | 0.1977 | 7.31E-03 | 0.7548    | 0.2661   | 5.53E-02 | 0.4232  | 0.2163 |
| 2:110286299 | rs3934873   | G | A | 0.45 | 8.16E-05 | 0.8434  | 0.2000 | 6.88E-03 | -0.7788   | 0.2732   | 6.05E-02 | -0.4188 | 0.2187 |
| 2:110289984 | rs9330320   | G | C | 0.45 | 8.45E-05 | 0.8411  | 0.1999 | 7.23E-03 | -0.7774   | 0.2744   | 6.54E-02 | -0.4109 | 0.2187 |
| 2:110305754 | rs36031306  | D | R | 0.47 | 9.30E-05 | 0.8791  | 0.2103 | 6.86E-03 | -0.7915   | 0.2737   | 1.84E-02 | -0.5472 | 0.2254 |
| 2:121269553 | rs66467070  | G | A | 0.82 | 2.00E-01 | 0.3620  | 0.2810 | 4.87E-01 | -0.2243   | 0.3170   | 3.86E-05 | -1.0771 | 0.2413 |
| 2:121271649 | rs4849900   | T | C | 0.88 | 2.22E-01 | 0.4045  | 0.3297 | 3.42E-01 | -0.3635   | 0.3771   | 5.39E-05 | -1.2416 | 0.2844 |
| 2:126989635 | rs35374245  | R | D | 0.65 | 1.80E-01 | 0.2681  | 0.1990 | 9.35E-01 | -0.0201   | 0.2542   | 3.48E-05 | -0.7677 | 0.1709 |
| 2:126990186 | rs28530590  | A | C | 0.64 | 1.99E-01 | 0.2566  | 0.1988 | 8.66E-01 | -0.0414   | 0.2541   | 4.50E-05 | -0.7562 | 0.1711 |
| 2:126991224 | rs68175812  | A | C | 0.64 | 1.92E-01 | 0.2626  | 0.2000 | 9.41E-01 | -0.0183   | 0.2546   | 3.72E-05 | -0.7685 | 0.1718 |
| 2:126991274 | rs68107644  | T | G | 0.64 | 1.96E-01 | 0.2596  | 0.1997 | 8.56E-01 | -0.0449   | 0.2557   | 5.07E-05 | -0.7556 | 0.1724 |
| 2:126994966 | rs390949    | T | C | 0.64 | 2.13E-01 | 0.2504  | 0.2002 | 8.72E-01 | -0.0397   | 0.2557   | 3.84E-05 | -0.7669 | 0.1718 |
| 2:126996142 | rs374585    | G | A | 0.64 | 2.15E-01 | 0.2496  | 0.2003 | 8.73E-01 | -0.0396   | 0.2559   | 3.79E-05 | -0.7679 | 0.1718 |
| 2:127008196 | rs771078    | T | G | 0.64 | 2.31E-01 | 0.2427  | 0.2019 | 8.76E-01 | -0.0390   | 0.2577   | 3.35E-05 | -0.7775 | 0.1726 |
| 2:127009083 | rs360256    | T | A | 0.64 | 2.36E-01 | 0.2414  | 0.2028 | 8.67E-01 | -0.0420   | 0.2589   | 3.42E-05 | -0.7800 | 0.1734 |
| 2:127011178 | rs360253    | A | G | 0.64 | 2.35E-01 | 0.2410  | 0.2022 | 8.77E-01 | -0.0387   | 0.2581   | 3.33E-05 | -0.7788 | 0.1728 |
| 2:127012268 | rs360252    | C | T | 0.64 | 2.35E-01 | 0.2411  | 0.2021 | 8.76E-01 | -0.0391   | 0.2581   | 3.27E-05 | -0.7793 | 0.1727 |
| 2:127013973 | rs360249    | C | G | 0.64 | 2.36E-01 | 0.2404  | 0.2022 | 8.75E-01 | -0.0392   | 0.2582   | 3.25E-05 | -0.7798 | 0.1728 |
| 2:127015379 | rs360248    | C | G | 0.64 | 2.38E-01 | 0.2396  | 0.2024 | 8.76E-01 | -0.0390   | 0.2584   | 3.22E-05 | -0.7806 | 0.1729 |

|             |             |   |   |      |          |         |        |          |         |         |          |         |        |
|-------------|-------------|---|---|------|----------|---------|--------|----------|---------|---------|----------|---------|--------|
| 2:127016832 | rs61411848  | A | G | 0.71 | 7.15E-02 | 0.3967  | 0.2174 | 9.85E-01 | -0.0050 | 0.2736  | 4.66E-05 | -0.8376 | 0.1900 |
| 2:127913835 | rs729666    | C | T | 0.70 | 3.61E-01 | 0.1857  | 0.2030 | 9.10E-01 | 0.0292  | 0.2615  | 9.67E-05 | -0.7372 | 0.1758 |
| 2:127918248 | rs4663107   | A | T | 0.71 | 3.62E-01 | 0.1818  | 0.1990 | 8.64E-01 | 0.0437  | 0.2609  | 9.94E-05 | -0.7217 | 0.1724 |
| 2:127919641 | rs11682330  | A | G | 0.70 | 3.77E-01 | 0.1763  | 0.1993 | 8.73E-01 | 0.0408  | 0.2609  | 9.15E-05 | -0.7254 | 0.1723 |
| 2:153342552 | rs10195380  | G | C | 0.66 | 4.50E-02 | -0.3747 | 0.1839 | 6.16E-02 | 0.4826  | 0.2661  | 8.88E-05 | 0.6903  | 0.1636 |
| 2:163128824 | rs3747517   | C | T | 0.67 | 8.92E-02 | 0.3520  | 0.2048 | 9.61E-05 | -0.8533 | 0.2085  | 2.42E-01 | -0.2414 | 0.2041 |
| 2:169740286 | rs560630789 | R | D | 0.86 | 4.01E-05 | -1.0912 | 0.2466 | 1.93E-01 | 0.5247  | 0.4242  | 1.82E-01 | 0.3742  | 0.2772 |
| 2:170638416 | rs74420714  | A | G | 0.94 | 8.91E-05 | -1.6595 | 0.3959 | 5.04E-01 | 0.5911  | 0.9309  | 1.68E-01 | 0.6126  | 0.4385 |
| 2:170639616 | rs116604999 | A | C | 0.94 | 8.94E-05 | -1.6596 | 0.3960 | 5.05E-01 | 0.5895  | 0.9307  | 1.67E-01 | 0.6134  | 0.4386 |
| 2:170640965 | rs145152157 | G | C | 0.94 | 8.93E-05 | -1.6626 | 0.3967 | 5.02E-01 | 0.5943  | 0.9326  | 1.59E-01 | 0.6260  | 0.4391 |
| 2:17131093  | rs36119023  | G | T | 0.84 | 8.89E-02 | 0.4206  | 0.2446 | 7.36E-02 | -0.4477 | 0.2381  | 9.42E-05 | -0.9060 | 0.2156 |
| 2:17132435  | rs34555172  | T | C | 0.84 | 9.20E-02 | 0.4087  | 0.2400 | 7.43E-02 | -0.4377 | 0.2335  | 9.06E-05 | -0.8903 | 0.2113 |
| 2:17137705  | rs4411692   | G | A | 0.84 | 7.99E-02 | 0.4145  | 0.2339 | 7.70E-02 | -0.4243 | 0.2292  | 8.53E-05 | -0.8723 | 0.2062 |
| 2:17140213  | rs2341496   | G | A | 0.84 | 8.62E-02 | 0.3961  | 0.2284 | 8.14E-02 | -0.4086 | 0.2246  | 7.86E-05 | -0.8543 | 0.2008 |
| 2:17140218  | rs2341497   | G | C | 0.84 | 8.62E-02 | 0.3962  | 0.2283 | 8.15E-02 | -0.4085 | 0.2246  | 7.86E-05 | -0.8543 | 0.2007 |
| 2:17182375  | rs12989499  | C | T | 0.82 | 7.92E-02 | 0.4217  | 0.2374 | 4.68E-02 | -0.4833 | 0.2274  | 9.08E-05 | -0.8824 | 0.2095 |
| 2:17506784  | rs4832491   | G | A | 0.88 | 5.31E-05 | 1.0439  | 0.2404 | 7.19E-01 | -0.1240 | 0.3497  | 4.34E-02 | -0.5441 | 0.2634 |
| 2:179134960 | rs333985    | G | T | 0.93 | 2.67E-01 | -0.4225 | 0.3796 | 5.41E-05 | 12.8419 | 13.6581 | 4.01E-01 | 0.3171  | 0.3750 |
| 2:181698441 | rs4666624   | G | T | 0.41 | 3.22E-01 | -0.2060 | 0.2076 | 6.51E-02 | 0.4825  | 0.2635  | 7.26E-05 | 0.7666  | 0.1792 |
| 2:181710499 | rs56378630  | T | C | 0.53 | 5.44E-01 | -0.1408 | 0.2319 | 7.17E-02 | 0.4502  | 0.2549  | 4.99E-05 | 0.8681  | 0.1978 |
| 2:181725206 | rs11679476  | A | G | 0.54 | 5.46E-01 | -0.1393 | 0.2310 | 5.98E-02 | 0.4638  | 0.2503  | 7.63E-05 | 0.8461  | 0.1984 |
| 2:205843688 | rs34432147  | R | D | 0.43 | 3.31E-01 | 0.2095  | 0.2151 | 9.28E-05 | -0.9837 | 0.2532  | 4.14E-01 | -0.1746 | 0.2120 |
| 2:221024539 | rs6748896   | G | A | 0.79 | 1.40E-01 | 0.3627  | 0.2442 | 9.11E-01 | 0.0330  | 0.2922  | 4.98E-06 | -1.0261 | 0.2035 |
| 2:241949703 | rs7571354   | T | C | 0.81 | 5.34E-05 | -0.9681 | 0.2230 | 3.72E-02 | 0.7765  | 0.4050  | 5.04E-01 | 0.1697  | 0.2523 |
| 2:3101773   | rs767885    | G | A | 0.88 | 9.14E-05 | 1.1996  | 0.2867 | 1.10E-01 | -0.5659 | 0.3449  | 3.76E-01 | -0.2863 | 0.3206 |
| 2:37498688  | rs72792829  | C | T | 0.76 | 1.45E-03 | 0.6893  | 0.2072 | 1.54E-02 | -0.5948 | 0.2468  | 9.96E-05 | -0.8158 | 0.1949 |
| 2:37528311  | rs57361399  | C | T | 0.76 | 1.92E-03 | 0.6785  | 0.2098 | 1.30E-02 | -0.6143 | 0.2493  | 9.25E-05 | -0.8257 | 0.1963 |
| 2:37603839  | rs17020628  | A | G | 0.91 | 3.07E-01 | 0.3695  | 0.3606 | 1.49E-05 | -1.4314 | 0.3104  | 9.97E-01 | -0.0015 | 0.3579 |
| 2:41192477  | rs55661203  | C | A | 0.93 | 8.55E-03 | -1.0630 | 0.3927 | 8.76E-05 | 12.4679 | 7.3704  | 1.53E-01 | 0.5835  | 0.4032 |
| 2:51304238  | rs2163018   | C | T | 0.71 | 2.35E-01 | -0.2837 | 0.2380 | 4.01E-01 | 0.2292  | 0.2702  | 9.67E-05 | 0.8687  | 0.2071 |
| 2:65084253  | rs764011    | A | T | 0.54 | 6.31E-02 | -0.4248 | 0.2255 | 9.95E-05 | 1.0059  | 0.2630  | 8.33E-02 | 0.3925  | 0.2227 |
| 2:65092059  | rs554062303 | R | I | 0.49 | 2.33E-02 | -0.5196 | 0.2243 | 2.24E-05 | 1.0808  | 0.2597  | 1.19E-01 | 0.3574  | 0.2259 |
| 2:65448938  | rs111600830 | T | C | 0.91 | 7.86E-05 | -1.1938 | 0.2823 | 5.11E-02 | 1.0650  | 0.6392  | 7.72E-01 | 0.0926  | 0.3184 |
| 2:74059356  | rs414255    | C | T | 0.85 | 2.70E-01 | 0.3474  | 0.3137 | 3.25E-05 | -1.1769 | 0.2549  | 7.92E-02 | -0.5422 | 0.3034 |

|            |             |   |   |      |          |        |        |          |         |        |          |         |        |
|------------|-------------|---|---|------|----------|--------|--------|----------|---------|--------|----------|---------|--------|
| 2:79968158 | rs11681484  | G | A | 0.56 | 2.74E-06 | 0.7630 | 0.1475 | 3.10E-01 | -0.2168 | 0.2130 | 3.06E-02 | -0.3748 | 0.1690 |
| 2:82049625 | rs62149760  | G | A | 0.88 | 4.66E-01 | 0.2264 | 0.3105 | 9.41E-01 | 0.0300  | 0.4002 | 8.19E-05 | -1.1348 | 0.2674 |
| 2:82053791 | rs62149762  | G | A | 0.85 | 1.97E-01 | 0.3757 | 0.2898 | 8.71E-01 | 0.0551  | 0.3326 | 3.54E-05 | -1.1156 | 0.2486 |
| 2:82056707 | rs62149763  | A | G | 0.82 | 3.52E-01 | 0.2638 | 0.2828 | 6.71E-01 | 0.1430  | 0.3355 | 3.80E-05 | -1.0775 | 0.2412 |
| 2:82056798 | rs142473614 | R | I | 0.82 | 3.52E-01 | 0.2638 | 0.2828 | 6.71E-01 | 0.1430  | 0.3355 | 3.80E-05 | -1.0775 | 0.2412 |
| 2:82060592 | rs11686486  | G | T | 0.85 | 1.97E-01 | 0.3758 | 0.2899 | 8.70E-01 | 0.0554  | 0.3327 | 3.56E-05 | -1.1157 | 0.2487 |
| 2:82068261 | rs62149764  | G | A | 0.85 | 1.97E-01 | 0.3759 | 0.2899 | 8.70E-01 | 0.0554  | 0.3327 | 3.54E-05 | -1.1159 | 0.2486 |
| 2:82069059 | rs36148655  | C | A | 0.85 | 1.96E-01 | 0.3773 | 0.2900 | 8.73E-01 | 0.0543  | 0.3328 | 3.49E-05 | -1.1174 | 0.2487 |
| 2:82069432 | rs62149766  | A | G | 0.85 | 1.96E-01 | 0.3774 | 0.2900 | 8.73E-01 | 0.0543  | 0.3328 | 3.48E-05 | -1.1175 | 0.2487 |
| 2:82069595 | rs530678060 | R | I | 0.82 | 3.49E-01 | 0.2654 | 0.2826 | 6.74E-01 | 0.1414  | 0.3351 | 3.64E-05 | -1.0790 | 0.2408 |
| 2:82077473 | rs11674245  | C | A | 0.85 | 1.97E-01 | 0.3764 | 0.2902 | 8.69E-01 | 0.0559  | 0.3329 | 3.50E-05 | -1.1175 | 0.2488 |
| 2:82077928 | rs62149767  | G | A | 0.82 | 3.47E-01 | 0.2663 | 0.2826 | 6.73E-01 | 0.1420  | 0.3352 | 3.64E-05 | -1.0791 | 0.2409 |
| 2:82077957 | rs142877367 | R | I | 0.82 | 3.47E-01 | 0.2663 | 0.2826 | 6.73E-01 | 0.1420  | 0.3352 | 3.64E-05 | -1.0791 | 0.2409 |
| 2:82078983 | rs62149768  | T | A | 0.85 | 1.95E-01 | 0.3777 | 0.2902 | 8.72E-01 | 0.0545  | 0.3329 | 3.43E-05 | -1.1188 | 0.2488 |
| 2:82085610 | rs62149770  | G | A | 0.85 | 1.96E-01 | 0.3781 | 0.2907 | 8.69E-01 | 0.0558  | 0.3332 | 3.38E-05 | -1.1215 | 0.2491 |
| 2:82088076 | rs7602295   | G | A | 0.82 | 3.48E-01 | 0.2657 | 0.2826 | 6.69E-01 | 0.1439  | 0.3351 | 3.76E-05 | -1.0773 | 0.2410 |
| 2:82088565 | rs10496253  | T | C | 0.85 | 1.97E-01 | 0.3764 | 0.2902 | 8.68E-01 | 0.0563  | 0.3330 | 3.55E-05 | -1.1170 | 0.2489 |
| 2:82093632 | rs17021075  | A | C | 0.85 | 1.97E-01 | 0.3761 | 0.2901 | 8.69E-01 | 0.0560  | 0.3329 | 3.57E-05 | -1.1163 | 0.2489 |
| 2:82094735 | rs62149771  | A | G | 0.85 | 1.97E-01 | 0.3762 | 0.2902 | 8.69E-01 | 0.0560  | 0.3330 | 3.57E-05 | -1.1165 | 0.2489 |
| 2:82106093 | rs10520309  | G | A | 0.82 | 3.42E-01 | 0.2690 | 0.2828 | 6.73E-01 | 0.1421  | 0.3353 | 3.67E-05 | -1.0794 | 0.2411 |
| 2:82116415 | rs17021134  | A | G | 0.85 | 1.97E-01 | 0.3767 | 0.2903 | 8.68E-01 | 0.0564  | 0.3332 | 3.60E-05 | -1.1168 | 0.2491 |
| 2:82149016 | rs62149794  | C | G | 0.85 | 1.97E-01 | 0.3769 | 0.2904 | 8.67E-01 | 0.0566  | 0.3333 | 3.61E-05 | -1.1169 | 0.2492 |
| 2:82149115 | rs62149795  | A | G | 0.85 | 1.83E-01 | 0.3892 | 0.2908 | 8.83E-01 | 0.0500  | 0.3337 | 2.94E-05 | -1.1304 | 0.2489 |
| 2:82150948 | rs7571397   | T | C | 0.82 | 3.01E-01 | 0.2907 | 0.2802 | 7.23E-01 | 0.1192  | 0.3339 | 3.04E-05 | -1.0809 | 0.2385 |
| 2:82162243 | rs62149798  | T | C | 0.85 | 1.81E-01 | 0.3918 | 0.2913 | 8.74E-01 | 0.0538  | 0.3341 | 3.08E-05 | -1.1300 | 0.2496 |
| 2:82170774 | rs10520307  | T | C | 0.85 | 1.80E-01 | 0.3934 | 0.2916 | 8.66E-01 | 0.0574  | 0.3343 | 3.23E-05 | -1.1289 | 0.2500 |
| 2:82171820 | rs62149799  | A | G | 0.85 | 1.80E-01 | 0.3936 | 0.2917 | 8.65E-01 | 0.0581  | 0.3344 | 3.26E-05 | -1.1287 | 0.2501 |
| 2:82172681 | rs141430405 | T | G | 0.85 | 1.80E-01 | 0.3938 | 0.2917 | 8.64E-01 | 0.0584  | 0.3344 | 3.28E-05 | -1.1285 | 0.2502 |
| 2:82173337 | rs62149800  | T | C | 0.85 | 1.80E-01 | 0.3939 | 0.2918 | 8.63E-01 | 0.0587  | 0.3344 | 3.29E-05 | -1.1284 | 0.2502 |
| 2:82173740 | rs62149801  | G | A | 0.85 | 1.80E-01 | 0.3939 | 0.2917 | 8.63E-01 | 0.0589  | 0.3344 | 3.31E-05 | -1.1281 | 0.2502 |
| 2:82176951 | rs78268192  | C | T | 0.85 | 1.79E-01 | 0.3948 | 0.2919 | 8.58E-01 | 0.0609  | 0.3345 | 3.41E-05 | -1.1272 | 0.2505 |
| 2:82180200 | rs62149819  | A | G | 0.85 | 1.78E-01 | 0.3955 | 0.2920 | 8.54E-01 | 0.0626  | 0.3345 | 3.50E-05 | -1.1262 | 0.2507 |
| 2:82180329 | rs77222195  | R | D | 0.85 | 1.78E-01 | 0.3956 | 0.2921 | 8.54E-01 | 0.0627  | 0.3346 | 3.50E-05 | -1.1264 | 0.2508 |
| 2:82180481 | rs45552344  | T | C | 0.85 | 1.78E-01 | 0.3955 | 0.2920 | 8.54E-01 | 0.0625  | 0.3346 | 3.48E-05 | -1.1266 | 0.2507 |

|             |             |   |   |      |          |         |        |          |         |        |          |         |        |
|-------------|-------------|---|---|------|----------|---------|--------|----------|---------|--------|----------|---------|--------|
| 2:82183544  | rs62149821  | G | A | 0.85 | 1.78E-01 | 0.3960  | 0.2921 | 8.52E-01 | 0.0637  | 0.3345 | 3.57E-05 | -1.1254 | 0.2509 |
| 2:82184724  | rs10496249  | T | C | 0.85 | 1.78E-01 | 0.3962  | 0.2921 | 8.51E-01 | 0.0641  | 0.3345 | 3.59E-05 | -1.1252 | 0.2509 |
| 2:82185174  | rs62149822  | C | T | 0.85 | 1.78E-01 | 0.3962  | 0.2921 | 8.50E-01 | 0.0643  | 0.3345 | 3.60E-05 | -1.1251 | 0.2509 |
| 2:82186981  | rs75258287  | R | D | 0.85 | 1.77E-01 | 0.3965  | 0.2921 | 8.49E-01 | 0.0650  | 0.3346 | 3.65E-05 | -1.1245 | 0.2510 |
| 2:82189438  | rs62149824  | C | A | 0.85 | 1.77E-01 | 0.3969  | 0.2922 | 8.46E-01 | 0.0663  | 0.3346 | 3.73E-05 | -1.1234 | 0.2512 |
| 2:82195358  | rs995108    | T | C | 0.85 | 1.76E-01 | 0.3977  | 0.2922 | 8.39E-01 | 0.0694  | 0.3346 | 3.93E-05 | -1.1211 | 0.2515 |
| 2:82200967  | rs62149834  | A | G | 0.85 | 1.74E-01 | 0.4003  | 0.2924 | 8.33E-01 | 0.0718  | 0.3347 | 3.93E-05 | -1.1220 | 0.2517 |
| 2:82206093  | rs17021275  | A | C | 0.85 | 1.81E-01 | 0.3941  | 0.2930 | 8.28E-01 | 0.0740  | 0.3346 | 3.74E-05 | -1.1264 | 0.2518 |
| 2:82207758  | rs17021281  | G | A | 0.85 | 1.70E-01 | 0.4029  | 0.2919 | 8.24E-01 | 0.0755  | 0.3341 | 4.64E-05 | -1.1110 | 0.2519 |
| 2:83572567  | rs79960757  | G | A | 0.95 | 4.64E-05 | 1.8229  | 0.4160 | 4.81E-01 | -0.4167 | 0.5804 | 5.22E-01 | -0.3042 | 0.4720 |
| 2:8790973   | rs3889716   | C | T | 0.88 | 2.16E-01 | 0.4017  | 0.3231 | 6.25E-01 | -0.2246 | 0.4590 | 6.16E-05 | -1.2088 | 0.2794 |
| 3:100187582 | rs35558966  | I | R | 0.48 | 1.07E-01 | 0.3119  | 0.1916 | 7.86E-02 | -0.4026 | 0.2192 | 5.08E-05 | -0.7307 | 0.1667 |
| 3:100193722 | rs7426388   | G | A | 0.48 | 1.13E-01 | 0.3052  | 0.1908 | 7.86E-02 | -0.4017 | 0.2190 | 5.08E-05 | -0.7273 | 0.1659 |
| 3:100193743 | rs7426390   | G | A | 0.48 | 1.09E-01 | 0.3089  | 0.1908 | 7.79E-02 | -0.4022 | 0.2188 | 4.58E-05 | -0.7312 | 0.1657 |
| 3:100194134 | rs149741858 | G | A | 0.48 | 1.09E-01 | 0.3086  | 0.1907 | 7.79E-02 | -0.4020 | 0.2187 | 4.54E-05 | -0.7310 | 0.1655 |
| 3:100196539 | rs76717130  | C | G | 0.48 | 1.11E-01 | 0.3057  | 0.1902 | 7.67E-02 | -0.4027 | 0.2184 | 4.67E-05 | -0.7282 | 0.1652 |
| 3:10379194  | rs76596509  | T | G | 0.78 | 2.71E-02 | 0.7554  | 0.3351 | 9.65E-05 | -1.3819 | 0.3380 | 3.29E-01 | -0.3360 | 0.3411 |
| 3:10379195  | rs75647954  | C | T | 0.78 | 2.71E-02 | 0.7553  | 0.3350 | 9.66E-05 | -1.3818 | 0.3380 | 3.29E-01 | -0.3361 | 0.3411 |
| 3:10379196  | rs77630473  | G | C | 0.78 | 2.65E-02 | 0.7590  | 0.3354 | 9.58E-05 | -1.3854 | 0.3388 | 3.23E-01 | -0.3407 | 0.3415 |
| 3:118551325 | rs73177871  | A | T | 0.88 | 2.42E-05 | -1.3924 | 0.3047 | 5.76E-03 | 1.6215  | 0.6624 | 3.65E-01 | 0.3180  | 0.3483 |
| 3:118553229 | rs56230528  | C | T | 0.88 | 2.48E-05 | -1.3842 | 0.3034 | 5.79E-03 | 1.6069  | 0.6565 | 3.80E-01 | 0.3071  | 0.3468 |
| 3:118554583 | rs1402582   | G | A | 0.88 | 2.79E-05 | -1.3526 | 0.2987 | 6.69E-03 | 1.5431  | 0.6373 | 4.27E-01 | 0.2729  | 0.3412 |
| 3:118557259 | rs73177882  | C | A | 0.88 | 3.41E-05 | -1.3206 | 0.2954 | 7.79E-03 | 1.4784  | 0.6198 | 4.48E-01 | 0.2571  | 0.3364 |
| 3:118557719 | rs73177884  | A | G | 0.88 | 3.45E-05 | -1.3193 | 0.2953 | 7.90E-03 | 1.4744  | 0.6191 | 4.48E-01 | 0.2568  | 0.3363 |
| 3:118557856 | rs76764161  | G | C | 0.88 | 3.46E-05 | -1.3184 | 0.2952 | 7.86E-03 | 1.4744  | 0.6187 | 4.49E-01 | 0.2561  | 0.3361 |
| 3:118559664 | rs149005255 | R | D | 0.88 | 3.68E-05 | -1.3124 | 0.2950 | 8.20E-03 | 1.4605  | 0.6156 | 4.55E-01 | 0.2526  | 0.3356 |
| 3:118560824 | rs73177893  | A | G | 0.88 | 3.74E-05 | -1.3081 | 0.2943 | 8.30E-03 | 1.4533  | 0.6134 | 4.56E-01 | 0.2511  | 0.3348 |
| 3:118565544 | rs60216851  | C | A | 0.88 | 4.81E-05 | -1.2733 | 0.2912 | 9.59E-03 | 1.3938  | 0.5979 | 4.87E-01 | 0.2310  | 0.3301 |
| 3:118565657 | rs58062630  | T | C | 0.88 | 4.79E-05 | -1.2679 | 0.2899 | 9.49E-03 | 1.3897  | 0.5954 | 4.92E-01 | 0.2275  | 0.3286 |
| 3:118565659 | rs58394464  | T | C | 0.88 | 4.80E-05 | -1.2678 | 0.2900 | 9.50E-03 | 1.3894  | 0.5953 | 4.92E-01 | 0.2274  | 0.3286 |
| 3:119278540 | rs16829984  | G | C | 0.90 | 4.20E-05 | 1.5813  | 0.3585 | 9.54E-01 | -0.0271 | 0.4718 | 8.39E-01 | -0.0834 | 0.4088 |
| 3:119289916 | rs7617301   | A | C | 0.91 | 1.97E-05 | 1.6578  | 0.3583 | 7.15E-01 | -0.1764 | 0.4818 | 3.86E-01 | -0.3594 | 0.4112 |
| 3:13695824  | rs6790948   | T | C | 0.92 | 2.27E-01 | -0.4449 | 0.3663 | 1.07E-01 | 0.7475  | 0.4738 | 4.87E-05 | 1.3860  | 0.3153 |
| 3:13696621  | rs9812762   | C | T | 0.92 | 2.46E-01 | -0.4229 | 0.3628 | 1.24E-01 | 0.7040  | 0.4659 | 3.99E-05 | 1.3846  | 0.3109 |

|            |             |   |   |      |          |         |        |          |        |        |          |        |        |
|------------|-------------|---|---|------|----------|---------|--------|----------|--------|--------|----------|--------|--------|
| 3:13702407 | rs60376071  | G | A | 0.92 | 2.35E-01 | -0.4317 | 0.3622 | 1.23E-01 | 0.7054 | 0.4660 | 4.33E-05 | 1.3776 | 0.3110 |
| 3:14883570 | rs55751892  | A | G | 0.82 | 2.04E-05 | -1.0282 | 0.2227 | 1.54E-01 | 0.4921 | 0.3549 | 3.07E-01 | 0.2627 | 0.2548 |
| 3:14893803 | rs1689529   | G | A | 0.82 | 2.10E-05 | -1.0243 | 0.2222 | 1.53E-01 | 0.4920 | 0.3544 | 3.16E-01 | 0.2570 | 0.2542 |
| 3:14898156 | rs11294286  | R | D | 0.81 | 2.08E-05 | -1.0311 | 0.2236 | 1.05E-01 | 0.5657 | 0.3612 | 1.76E-01 | 0.3477 | 0.2540 |
| 3:14902315 | rs34317529  | R | I | 0.83 | 2.30E-05 | -1.0532 | 0.2298 | 1.40E-01 | 0.5266 | 0.3679 | 2.53E-01 | 0.3024 | 0.2618 |
| 3:14903150 | rs1689576   | T | C | 0.82 | 2.31E-05 | -1.0171 | 0.2220 | 1.49E-01 | 0.4953 | 0.3541 | 3.31E-01 | 0.2489 | 0.2537 |
| 3:14903536 | rs294629    | A | G | 0.82 | 2.23E-05 | -1.0169 | 0.2215 | 1.48E-01 | 0.4967 | 0.3537 | 3.31E-01 | 0.2482 | 0.2532 |
| 3:14911736 | rs1689571   | A | G | 0.82 | 2.58E-05 | -1.0093 | 0.2218 | 1.52E-01 | 0.4903 | 0.3530 | 3.47E-01 | 0.2402 | 0.2531 |
| 3:14911808 | rs1687290   | C | T | 0.82 | 2.59E-05 | -1.0092 | 0.2218 | 1.52E-01 | 0.4905 | 0.3530 | 3.47E-01 | 0.2402 | 0.2531 |
| 3:14912169 | rs1656441   | C | T | 0.82 | 2.59E-05 | -1.0089 | 0.2218 | 1.52E-01 | 0.4903 | 0.3529 | 3.47E-01 | 0.2397 | 0.2531 |
| 3:14912310 | rs1689570   | A | G | 0.82 | 2.60E-05 | -1.0089 | 0.2218 | 1.52E-01 | 0.4901 | 0.3529 | 3.48E-01 | 0.2395 | 0.2531 |
| 3:14912402 | rs1687291   | G | A | 0.82 | 2.60E-05 | -1.0088 | 0.2218 | 1.52E-01 | 0.4902 | 0.3529 | 3.48E-01 | 0.2396 | 0.2531 |
| 3:14913294 | rs1622485   | A | T | 0.82 | 2.62E-05 | -1.0082 | 0.2218 | 1.53E-01 | 0.4898 | 0.3528 | 3.49E-01 | 0.2390 | 0.2530 |
| 3:14913407 | rs1687292   | G | T | 0.82 | 2.62E-05 | -1.0082 | 0.2218 | 1.53E-01 | 0.4898 | 0.3528 | 3.49E-01 | 0.2390 | 0.2530 |
| 3:14913548 | rs1656440   | C | T | 0.82 | 2.63E-05 | -1.0080 | 0.2218 | 1.53E-01 | 0.4897 | 0.3528 | 3.49E-01 | 0.2388 | 0.2530 |
| 3:14913756 | rs536984778 | R | D | 0.82 | 2.71E-05 | -1.0085 | 0.2223 | 1.61E-01 | 0.4810 | 0.3526 | 3.51E-01 | 0.2383 | 0.2535 |
| 3:14913815 | rs1656439   | T | G | 0.82 | 2.63E-05 | -1.0079 | 0.2218 | 1.53E-01 | 0.4896 | 0.3528 | 3.50E-01 | 0.2387 | 0.2530 |
| 3:14913882 | rs1689569   | A | G | 0.82 | 2.63E-05 | -1.0080 | 0.2218 | 1.53E-01 | 0.4897 | 0.3528 | 3.50E-01 | 0.2386 | 0.2530 |
| 3:14914149 | rs1656438   | G | T | 0.82 | 2.63E-05 | -1.0091 | 0.2220 | 1.51E-01 | 0.4920 | 0.3534 | 3.46E-01 | 0.2406 | 0.2533 |
| 3:14914212 | rs1656437   | T | A | 0.82 | 2.84E-05 | -1.0074 | 0.2227 | 1.69E-01 | 0.4718 | 0.3523 | 3.55E-01 | 0.2366 | 0.2538 |
| 3:14914385 | rs1625709   | C | T | 0.82 | 2.83E-05 | -1.0076 | 0.2227 | 1.69E-01 | 0.4716 | 0.3524 | 3.56E-01 | 0.2364 | 0.2538 |
| 3:14914409 | rs1602297   | G | A | 0.82 | 2.62E-05 | -1.0088 | 0.2219 | 1.52E-01 | 0.4901 | 0.3530 | 3.52E-01 | 0.2378 | 0.2532 |
| 3:14914578 | rs1602298   | A | G | 0.82 | 2.62E-05 | -1.0088 | 0.2219 | 1.53E-01 | 0.4899 | 0.3530 | 3.52E-01 | 0.2377 | 0.2532 |
| 3:14914657 | rs1602299   | G | A | 0.82 | 2.62E-05 | -1.0089 | 0.2219 | 1.53E-01 | 0.4900 | 0.3530 | 3.52E-01 | 0.2377 | 0.2532 |
| 3:14914699 | rs1602300   | A | G | 0.82 | 2.62E-05 | -1.0093 | 0.2220 | 1.53E-01 | 0.4902 | 0.3531 | 3.52E-01 | 0.2377 | 0.2533 |
| 3:14914965 | rs17040460  | A | G | 0.82 | 2.61E-05 | -1.0095 | 0.2220 | 1.52E-01 | 0.4904 | 0.3531 | 3.53E-01 | 0.2373 | 0.2534 |
| 3:14915046 | rs1627256   | C | A | 0.82 | 2.62E-05 | -1.0095 | 0.2220 | 1.53E-01 | 0.4901 | 0.3531 | 3.53E-01 | 0.2372 | 0.2534 |
| 3:14915088 | rs1627146   | T | G | 0.82 | 2.61E-05 | -1.0096 | 0.2220 | 1.53E-01 | 0.4902 | 0.3531 | 3.53E-01 | 0.2372 | 0.2534 |
| 3:14915131 | rs1631793   | C | T | 0.82 | 2.61E-05 | -1.0097 | 0.2221 | 1.53E-01 | 0.4903 | 0.3532 | 3.54E-01 | 0.2370 | 0.2534 |
| 3:14915132 | rs1626374   | A | G | 0.82 | 2.61E-05 | -1.0099 | 0.2221 | 1.52E-01 | 0.4904 | 0.3532 | 3.54E-01 | 0.2370 | 0.2534 |
| 3:14915512 | rs2636753   | A | G | 0.82 | 2.61E-05 | -1.0104 | 0.2222 | 1.52E-01 | 0.4906 | 0.3533 | 3.55E-01 | 0.2364 | 0.2536 |
| 3:14915532 | rs2729696   | C | T | 0.82 | 2.61E-05 | -1.0105 | 0.2222 | 1.52E-01 | 0.4908 | 0.3534 | 3.55E-01 | 0.2364 | 0.2536 |
| 3:14915596 | rs113459364 | R | D | 0.82 | 2.60E-05 | -1.0107 | 0.2222 | 1.52E-01 | 0.4909 | 0.3534 | 3.56E-01 | 0.2362 | 0.2536 |
| 3:14915600 | rs201570736 | A | G | 0.82 | 2.60E-05 | -1.0107 | 0.2222 | 1.52E-01 | 0.4907 | 0.3534 | 3.56E-01 | 0.2361 | 0.2536 |

|             |             |   |   |      |          |         |        |          |         |        |          |         |        |
|-------------|-------------|---|---|------|----------|---------|--------|----------|---------|--------|----------|---------|--------|
| 3:14915662  | rs1656434   | G | A | 0.82 | 2.61E-05 | -1.0108 | 0.2223 | 1.52E-01 | 0.4909  | 0.3534 | 3.56E-01 | 0.2359  | 0.2537 |
| 3:14915673  | rs1687293   | G | A | 0.82 | 2.60E-05 | -1.0109 | 0.2223 | 1.52E-01 | 0.4910  | 0.3534 | 3.56E-01 | 0.2358  | 0.2537 |
| 3:14916048  | rs9822464   | T | C | 0.82 | 2.81E-05 | -1.0099 | 0.2231 | 1.68E-01 | 0.4739  | 0.3530 | 3.63E-01 | 0.2331  | 0.2544 |
| 3:14916684  | rs1656433   | C | T | 0.82 | 2.59E-05 | -1.0123 | 0.2225 | 1.52E-01 | 0.4916  | 0.3538 | 3.59E-01 | 0.2348  | 0.2540 |
| 3:14916813  | rs1656432   | T | C | 0.82 | 2.72E-05 | -1.0108 | 0.2228 | 1.51E-01 | 0.4937  | 0.3540 | 3.60E-01 | 0.2347  | 0.2542 |
| 3:14916830  | rs75182489  | R | D | 0.82 | 2.58E-05 | -1.0125 | 0.2225 | 1.52E-01 | 0.4917  | 0.3538 | 3.60E-01 | 0.2346  | 0.2540 |
| 3:14916858  | rs1656431   | C | T | 0.82 | 2.59E-05 | -1.0125 | 0.2226 | 1.52E-01 | 0.4920  | 0.3539 | 3.60E-01 | 0.2343  | 0.2541 |
| 3:14918986  | rs293918    | G | A | 0.82 | 2.56E-05 | -1.0156 | 0.2230 | 1.51E-01 | 0.4937  | 0.3546 | 3.67E-01 | 0.2314  | 0.2547 |
| 3:14919254  | rs293919    | A | G | 0.82 | 2.61E-05 | -1.0159 | 0.2234 | 1.59E-01 | 0.4846  | 0.3542 | 3.71E-01 | 0.2302  | 0.2551 |
| 3:14919352  | rs293920    | A | G | 0.82 | 2.62E-05 | -1.0157 | 0.2234 | 1.59E-01 | 0.4851  | 0.3543 | 3.71E-01 | 0.2302  | 0.2551 |
| 3:14919378  | rs293921    | A | G | 0.82 | 2.62E-05 | -1.0158 | 0.2234 | 1.59E-01 | 0.4849  | 0.3543 | 3.71E-01 | 0.2300  | 0.2551 |
| 3:14919996  | rs293922    | C | T | 0.82 | 2.54E-05 | -1.0166 | 0.2232 | 1.51E-01 | 0.4942  | 0.3548 | 3.71E-01 | 0.2300  | 0.2550 |
| 3:14920010  | rs293923    | G | T | 0.82 | 2.54E-05 | -1.0167 | 0.2232 | 1.51E-01 | 0.4943  | 0.3548 | 3.71E-01 | 0.2299  | 0.2550 |
| 3:14920105  | rs293924    | G | A | 0.82 | 2.46E-05 | -1.0171 | 0.2228 | 1.50E-01 | 0.4953  | 0.3545 | 3.71E-01 | 0.2294  | 0.2547 |
| 3:14924204  | rs140724200 | R | D | 0.72 | 7.63E-05 | -1.0265 | 0.2422 | 6.93E-01 | 0.1302  | 0.3315 | 1.65E-01 | 0.3780  | 0.2690 |
| 3:151057219 | rs10645486  | I | R | 0.82 | 4.82E-02 | 0.5007  | 0.2496 | 2.74E-02 | -0.6353 | 0.2769 | 4.90E-05 | -0.9646 | 0.2195 |
| 3:169946404 | rs142544612 | R | I | 0.85 | 6.73E-01 | 0.1578  | 0.3739 | 9.61E-01 | -0.0233 | 0.4638 | 9.98E-05 | 1.3478  | 0.3221 |
| 3:169966168 | rs145718729 | D | R | 0.47 | 8.22E-01 | 0.0530  | 0.2364 | 2.20E-01 | -0.3385 | 0.2795 | 2.04E-05 | -0.9202 | 0.1980 |
| 3:169968220 | rs141812733 | R | D | 0.42 | 7.74E-01 | 0.0722  | 0.2523 | 4.20E-01 | -0.2414 | 0.3026 | 1.14E-05 | -1.0072 | 0.2093 |
| 3:169980956 | N/A         | R | D | 0.51 | 4.14E-01 | -0.1698 | 0.2078 | 8.06E-01 | -0.0802 | 0.3139 | 1.45E-01 | -0.2981 | 0.2017 |
| 3:187652956 | rs138458084 | I | R | 0.78 | 6.09E-05 | 0.9351  | 0.2173 | 2.10E-02 | -0.6497 | 0.2679 | 4.72E-01 | -0.1777 | 0.2452 |
| 3:20076191  | rs1915924   | C | G | 0.72 | 2.73E-01 | -0.2519 | 0.2288 | 7.63E-01 | -0.0807 | 0.2651 | 3.32E-05 | 0.8800  | 0.1953 |
| 3:20077262  | rs35747495  | C | T | 0.72 | 2.70E-01 | -0.2516 | 0.2274 | 7.46E-01 | -0.0861 | 0.2634 | 4.10E-05 | 0.8656  | 0.1947 |
| 3:20079878  | rs12639078  | A | G | 0.72 | 2.83E-01 | -0.2420 | 0.2245 | 6.97E-01 | -0.1015 | 0.2586 | 5.23E-05 | 0.8442  | 0.1930 |
| 3:20479899  | rs17007012  | A | G | 0.82 | 9.76E-05 | 0.9656  | 0.2318 | 4.82E-01 | 0.2293  | 0.3306 | 2.92E-01 | -0.2744 | 0.2582 |
| 3:20480253  | rs12492284  | A | G | 0.82 | 9.74E-05 | 0.9657  | 0.2318 | 4.82E-01 | 0.2293  | 0.3306 | 2.93E-01 | -0.2742 | 0.2582 |
| 3:20482674  | rs13347246  | G | A | 0.83 | 9.58E-05 | 0.9664  | 0.2317 | 4.81E-01 | 0.2296  | 0.3305 | 2.96E-01 | -0.2722 | 0.2582 |
| 3:20483056  | rs13347248  | C | A | 0.83 | 9.57E-05 | 0.9664  | 0.2317 | 4.81E-01 | 0.2296  | 0.3305 | 2.97E-01 | -0.2720 | 0.2582 |
| 3:20483808  | rs12488716  | C | A | 0.83 | 8.82E-05 | 0.9820  | 0.2341 | 4.66E-01 | 0.2427  | 0.3365 | 3.17E-01 | -0.2637 | 0.2614 |
| 3:20487081  | rs2366076   | A | G | 0.83 | 9.31E-05 | 0.9673  | 0.2315 | 4.79E-01 | 0.2305  | 0.3304 | 3.06E-01 | -0.2669 | 0.2581 |
| 3:20489192  | rs35688043  | G | T | 0.83 | 9.21E-05 | 0.9676  | 0.2314 | 4.79E-01 | 0.2306  | 0.3303 | 3.09E-01 | -0.2650 | 0.2581 |
| 3:20495570  | rs59608357  | T | A | 0.83 | 8.81E-05 | 0.9694  | 0.2311 | 4.78E-01 | 0.2308  | 0.3301 | 3.18E-01 | -0.2600 | 0.2581 |
| 3:20496715  | rs2203934   | C | G | 0.83 | 8.93E-05 | 0.9682  | 0.2310 | 4.77E-01 | 0.2313  | 0.3299 | 3.21E-01 | -0.2581 | 0.2579 |
| 3:20497659  | rs6550523   | G | A | 0.83 | 8.91E-05 | 0.9681  | 0.2309 | 4.77E-01 | 0.2314  | 0.3299 | 3.23E-01 | -0.2572 | 0.2579 |

|            |             |   |   |      |          |         |        |          |         |        |          |         |        |
|------------|-------------|---|---|------|----------|---------|--------|----------|---------|--------|----------|---------|--------|
| 3:20497740 | rs6550524   | G | A | 0.83 | 8.90E-05 | 0.9681  | 0.2309 | 4.77E-01 | 0.2314  | 0.3299 | 3.23E-01 | -0.2571 | 0.2579 |
| 3:20497835 | rs10510502  | A | G | 0.83 | 8.90E-05 | 0.9681  | 0.2309 | 4.77E-01 | 0.2313  | 0.3298 | 3.23E-01 | -0.2571 | 0.2579 |
| 3:20499291 | rs60773738  | G | A | 0.82 | 7.02E-05 | 0.9855  | 0.2312 | 5.00E-01 | 0.2203  | 0.3310 | 3.91E-01 | -0.2247 | 0.2598 |
| 3:20499492 | rs145623105 | G | A | 0.83 | 8.62E-05 | 0.9696  | 0.2308 | 4.76E-01 | 0.2315  | 0.3297 | 3.26E-01 | -0.2556 | 0.2579 |
| 3:20501936 | rs12495532  | C | T | 0.83 | 8.75E-05 | 0.9680  | 0.2306 | 4.76E-01 | 0.2315  | 0.3295 | 3.30E-01 | -0.2532 | 0.2577 |
| 3:20502704 | rs10716124  | R | D | 0.83 | 8.71E-05 | 0.9680  | 0.2306 | 4.76E-01 | 0.2315  | 0.3295 | 3.31E-01 | -0.2525 | 0.2576 |
| 3:20503129 | rs6762123   | G | A | 0.83 | 8.91E-05 | 0.9690  | 0.2312 | 4.69E-01 | 0.2356  | 0.3303 | 3.42E-01 | -0.2476 | 0.2583 |
| 3:20503477 | rs5847054   | R | D | 0.57 | 4.83E-01 | 0.1287  | 0.1834 | 4.02E-02 | -0.4429 | 0.2124 | 1.98E-01 | -0.3296 | 0.2528 |
| 3:20503600 | rs61526106  | C | T | 0.83 | 8.70E-05 | 0.9680  | 0.2305 | 4.76E-01 | 0.2315  | 0.3294 | 3.32E-01 | -0.2521 | 0.2576 |
| 3:20503795 | rs17007057  | A | C | 0.83 | 8.72E-05 | 0.9679  | 0.2305 | 4.76E-01 | 0.2316  | 0.3295 | 3.32E-01 | -0.2520 | 0.2576 |
| 3:20503821 | rs57344311  | G | A | 0.83 | 8.72E-05 | 0.9679  | 0.2305 | 4.76E-01 | 0.2316  | 0.3295 | 3.32E-01 | -0.2520 | 0.2576 |
| 3:20503859 | rs60145530  | R | D | 0.83 | 8.72E-05 | 0.9679  | 0.2305 | 4.76E-01 | 0.2316  | 0.3295 | 3.32E-01 | -0.2520 | 0.2576 |
| 3:20504026 | rs17007063  | T | C | 0.83 | 8.57E-05 | 0.9680  | 0.2303 | 4.74E-01 | 0.2324  | 0.3293 | 3.32E-01 | -0.2520 | 0.2574 |
| 3:20504066 | rs59264312  | A | G | 0.83 | 8.51E-05 | 0.9686  | 0.2303 | 4.77E-01 | 0.2309  | 0.3293 | 3.32E-01 | -0.2519 | 0.2575 |
| 3:20504149 | rs56332973  | R | D | 0.83 | 8.88E-05 | 0.9724  | 0.2319 | 4.69E-01 | 0.2362  | 0.3310 | 2.84E-01 | -0.2794 | 0.2586 |
| 3:20504714 | rs6808521   | T | A | 0.83 | 8.72E-05 | 0.9679  | 0.2305 | 4.76E-01 | 0.2316  | 0.3295 | 3.32E-01 | -0.2520 | 0.2576 |
| 3:20504881 | rs73187189  | G | A | 0.83 | 8.73E-05 | 0.9679  | 0.2306 | 4.76E-01 | 0.2317  | 0.3295 | 3.32E-01 | -0.2520 | 0.2577 |
| 3:20504883 | rs76205109  | T | C | 0.83 | 8.73E-05 | 0.9679  | 0.2306 | 4.76E-01 | 0.2317  | 0.3295 | 3.32E-01 | -0.2520 | 0.2577 |
| 3:20505047 | rs6808851   | T | C | 0.83 | 8.73E-05 | 0.9679  | 0.2306 | 4.76E-01 | 0.2317  | 0.3295 | 3.32E-01 | -0.2520 | 0.2577 |
| 3:20505156 | rs6808959   | T | C | 0.83 | 8.73E-05 | 0.9679  | 0.2306 | 4.76E-01 | 0.2317  | 0.3295 | 3.32E-01 | -0.2520 | 0.2577 |
| 3:20505431 | rs6809254   | T | C | 0.83 | 8.72E-05 | 0.9679  | 0.2305 | 4.76E-01 | 0.2317  | 0.3295 | 3.32E-01 | -0.2520 | 0.2576 |
| 3:20505603 | rs6794717   | C | T | 0.83 | 8.72E-05 | 0.9679  | 0.2306 | 4.75E-01 | 0.2318  | 0.3295 | 3.32E-01 | -0.2519 | 0.2577 |
| 3:20527133 | rs648238    | A | G | 0.83 | 8.72E-05 | 0.9679  | 0.2306 | 4.76E-01 | 0.2316  | 0.3295 | 3.32E-01 | -0.2519 | 0.2577 |
| 3:20527529 | rs646454    | T | C | 0.83 | 8.72E-05 | 0.9679  | 0.2305 | 4.76E-01 | 0.2315  | 0.3294 | 3.32E-01 | -0.2520 | 0.2576 |
| 3:36711297 | rs9869380   | G | T | 0.52 | 3.61E-06 | 0.9182  | 0.1801 | 3.04E-01 | -0.2539 | 0.2459 | 2.18E-01 | -0.2632 | 0.2113 |
| 3:36740273 | rs10865875  | G | A | 0.52 | 8.40E-05 | -0.7592 | 0.1804 | 6.67E-01 | 0.0996  | 0.2229 | 3.02E-01 | 0.2101  | 0.2015 |
| 3:5568521  | rs202109419 | T | C | 0.94 | 5.90E-05 | -1.6399 | 0.3803 | 1.27E-02 | 4.3007  | 2.9213 | 7.52E-01 | 0.1369  | 0.4309 |
| 3:5568636  | rs202024380 | T | A | 0.93 | 7.00E-05 | -1.5395 | 0.3612 | 1.09E-02 | 3.7504  | 2.3215 | 8.85E-01 | 0.0592  | 0.4084 |
| 3:5568937  | rs200425927 | G | A | 0.93 | 8.27E-05 | -1.5239 | 0.3616 | 7.66E-03 | 3.8386  | 2.2293 | 8.94E-01 | 0.0548  | 0.4078 |
| 3:5569086  | rs112583124 | G | A | 0.93 | 6.02E-05 | -1.5355 | 0.3565 | 8.01E-03 | 3.8428  | 2.2509 | 9.13E-01 | 0.0442  | 0.4042 |
| 3:5569231  | rs141985842 | G | A | 0.93 | 6.03E-05 | -1.5346 | 0.3564 | 8.17E-03 | 3.8150  | 2.2369 | 9.18E-01 | 0.0416  | 0.4040 |
| 3:5569301  | rs145943875 | C | G | 0.93 | 6.01E-05 | -1.5353 | 0.3565 | 8.18E-03 | 3.8180  | 2.2392 | 9.18E-01 | 0.0419  | 0.4042 |
| 3:5569429  | rs200802860 | R | D | 0.93 | 7.64E-05 | -1.5064 | 0.3555 | 7.00E-03 | 3.8075  | 2.1828 | 9.02E-01 | 0.0496  | 0.4014 |
| 3:5571785  | rs148415352 | A | G | 0.91 | 2.15E-05 | -1.8622 | 0.4047 | 1.78E-02 | 2.9725  | 1.6281 | 7.36E-01 | 0.1577  | 0.4664 |

|             |             |   |   |      |          |         |        |          |         |        |          |         |        |
|-------------|-------------|---|---|------|----------|---------|--------|----------|---------|--------|----------|---------|--------|
| 3:63319012  | rs545756228 | R | I | 0.88 | 2.37E-02 | 0.6596  | 0.2855 | 2.68E-01 | -0.4160 | 0.3629 | 5.54E-05 | -1.1086 | 0.2544 |
| 3:82769356  | rs112063763 | C | G | 0.63 | 8.17E-01 | -0.0598 | 0.2582 | 4.65E-01 | -0.2055 | 0.2830 | 4.89E-05 | -0.9648 | 0.2195 |
| 3:89081611  | rs138754151 | R | I | 0.64 | 1.63E-01 | 0.4132  | 0.2944 | 3.93E-01 | -0.3153 | 0.3670 | 5.03E-06 | -1.2345 | 0.2450 |
| 3:8912559   | rs6798498   | C | T | 0.89 | 5.76E-01 | -0.1827 | 0.3270 | 7.25E-05 | 1.8677  | 0.5384 | 9.21E-01 | -0.0323 | 0.3224 |
| 3:8912579   | rs6773293   | G | C | 0.93 | 6.32E-01 | 0.1890  | 0.3953 | 7.60E-05 | 2.2387  | 0.6519 | 7.10E-01 | 0.1455  | 0.3890 |
| 3:8913024   | rs150747738 | R | I | 0.91 | 6.02E-01 | -0.1892 | 0.3634 | 2.00E-05 | 2.3622  | 0.6482 | 4.09E-01 | 0.2960  | 0.3560 |
| 3:8928891   | rs34003290  | A | C | 0.87 | 6.44E-01 | -0.1437 | 0.3115 | 8.51E-05 | 1.6907  | 0.4907 | 5.42E-01 | 0.1876  | 0.3058 |
| 4:101922250 | rs61482615  | R | D | 0.61 | 7.21E-05 | -0.7040 | 0.1655 | 6.85E-02 | 0.4556  | 0.2521 | 2.99E-02 | 0.3997  | 0.1794 |
| 4:109600898 | rs2851358   | A | G | 0.41 | 1.47E-01 | -0.2823 | 0.1932 | 7.74E-01 | 0.0660  | 0.2279 | 7.12E-05 | 0.7210  | 0.1683 |
| 4:109610141 | rs2575635   | T | C | 0.59 | 1.49E-01 | 0.2809  | 0.1932 | 7.82E-01 | -0.0638 | 0.2277 | 7.17E-05 | -0.7209 | 0.1683 |
| 4:109611234 | rs6832162   | C | T | 0.82 | 4.72E-02 | 0.5110  | 0.2536 | 4.00E-01 | -0.2598 | 0.3113 | 6.92E-05 | -0.9634 | 0.2244 |
| 4:109612784 | rs144247702 | R | I | 0.49 | 2.30E-01 | -0.2540 | 0.2109 | 9.80E-01 | 0.0061  | 0.2434 | 6.48E-05 | 0.7865  | 0.1824 |
| 4:109612900 | rs7687338   | C | A | 0.59 | 1.39E-01 | 0.2880  | 0.1930 | 7.83E-01 | -0.0633 | 0.2275 | 6.74E-05 | -0.7232 | 0.1682 |
| 4:109612903 | rs7665650   | G | T | 0.59 | 1.39E-01 | 0.2881  | 0.1931 | 7.83E-01 | -0.0633 | 0.2275 | 6.73E-05 | -0.7233 | 0.1682 |
| 4:109612910 | rs7687346   | G | A | 0.59 | 1.40E-01 | 0.2869  | 0.1931 | 7.81E-01 | -0.0639 | 0.2275 | 6.74E-05 | -0.7233 | 0.1682 |
| 4:109612966 | rs200030909 | I | R | 0.59 | 1.43E-01 | 0.2852  | 0.1932 | 7.91E-01 | -0.0608 | 0.2272 | 6.90E-05 | -0.7226 | 0.1683 |
| 4:109613591 | rs146337048 | D | R | 0.59 | 1.38E-01 | 0.2882  | 0.1929 | 7.85E-01 | -0.0627 | 0.2272 | 6.67E-05 | -0.7232 | 0.1681 |
| 4:109614319 | rs2082966   | G | A | 0.59 | 1.38E-01 | 0.2883  | 0.1930 | 7.84E-01 | -0.0629 | 0.2272 | 6.68E-05 | -0.7233 | 0.1681 |
| 4:109619199 | rs199721649 | R | D | 0.75 | 8.32E-02 | 0.4055  | 0.2314 | 4.46E-01 | -0.2140 | 0.2848 | 5.74E-05 | -0.8804 | 0.2025 |
| 4:109621884 | rs2077246   | A | G | 0.59 | 1.34E-01 | 0.2912  | 0.1927 | 7.87E-01 | -0.0619 | 0.2269 | 6.47E-05 | -0.7239 | 0.1679 |
| 4:109627964 | rs2575617   | A | G | 0.59 | 1.29E-01 | 0.2958  | 0.1933 | 7.91E-01 | -0.0607 | 0.2273 | 6.50E-05 | -0.7261 | 0.1684 |
| 4:110569850 | rs58722526  | R | D | 0.75 | 4.92E-02 | 0.5505  | 0.2757 | 4.42E-01 | -0.2703 | 0.3460 | 6.19E-06 | -1.1664 | 0.2341 |
| 4:127692720 | rs12647245  | A | G | 0.68 | 6.08E-01 | 0.1136  | 0.2214 | 6.60E-05 | -0.9071 | 0.2144 | 1.91E-01 | -0.2841 | 0.2149 |
| 4:134467690 | rs568971068 | R | D | 0.90 | 9.63E-05 | 1.8105  | 0.4343 | 6.49E-02 | 1.4628  | 0.8712 | 4.96E-02 | -0.9471 | 0.4722 |
| 4:14925721  | rs71597565  | C | G | 0.75 | 1.57E-01 | -0.3210 | 0.2253 | 1.92E-01 | 0.3544  | 0.2732 | 4.60E-05 | 0.8589  | 0.1946 |
| 4:14933392  | rs35039217  | A | G | 0.78 | 2.90E-02 | -0.4908 | 0.2205 | 2.83E-01 | 0.2955  | 0.2761 | 5.05E-05 | 0.8576  | 0.1956 |
| 4:14939389  | rs34479500  | G | A | 0.78 | 2.95E-02 | -0.4967 | 0.2238 | 2.62E-01 | 0.3130  | 0.2803 | 4.98E-05 | 0.8708  | 0.1984 |
| 4:14948645  | rs33979623  | C | G | 0.78 | 3.15E-02 | -0.4958 | 0.2262 | 5.02E-01 | 0.1993  | 0.2905 | 6.85E-05 | 0.8652  | 0.2014 |
| 4:14986918  | rs71648191  | R | D | 0.73 | 1.49E-01 | -0.3118 | 0.2146 | 7.04E-02 | 0.4982  | 0.2744 | 5.30E-06 | 0.8988  | 0.1789 |
| 4:15036835  | rs71648192  | R | I | 0.78 | 2.15E-01 | -0.3095 | 0.2487 | 6.56E-02 | 0.6497  | 0.3519 | 4.01E-06 | 1.0477  | 0.2053 |
| 4:156616621 | rs7688323   | A | G | 0.82 | 9.74E-03 | 0.5690  | 0.2141 | 6.51E-01 | -0.1213 | 0.2656 | 8.48E-05 | -0.8246 | 0.1948 |
| 4:156620217 | rs72685791  | G | A | 0.82 | 1.03E-02 | 0.5621  | 0.2132 | 6.42E-01 | -0.1238 | 0.2641 | 8.99E-05 | -0.8178 | 0.1940 |
| 4:156628756 | rs568661109 | R | I | 0.79 | 5.63E-03 | 0.6083  | 0.2128 | 5.19E-01 | -0.1638 | 0.2500 | 2.72E-05 | -0.8744 | 0.1916 |
| 4:157604689 | rs66885035  | R | D | 0.79 | 7.97E-05 | -1.0977 | 0.2598 | 9.63E-02 | 0.6165  | 0.3742 | 1.79E-02 | 0.6805  | 0.2790 |

|             |             |   |   |      |          |         |        |          |         |        |          |         |        |
|-------------|-------------|---|---|------|----------|---------|--------|----------|---------|--------|----------|---------|--------|
| 4:168802014 | rs7678715   | T | C | 0.76 | 2.32E-01 | 0.2940  | 0.2451 | 3.97E-01 | -0.2337 | 0.2759 | 7.39E-05 | -0.9078 | 0.2124 |
| 4:172139320 | rs11378625  | I | R | 0.73 | 7.00E-05 | 0.9762  | 0.2290 | 9.94E-01 | 0.0026  | 0.3322 | 5.65E-01 | -0.1496 | 0.2583 |
| 4:185156234 | rs13137454  | G | A | 0.53 | 5.60E-05 | 0.7456  | 0.1723 | 2.30E-01 | -0.2681 | 0.2213 | 1.30E-01 | -0.2945 | 0.1917 |
| 4:185156248 | rs371049171 | C | A | 0.57 | 3.41E-05 | 0.8263  | 0.1848 | 1.06E-01 | -0.3878 | 0.2366 | 6.53E-02 | -0.3858 | 0.2053 |
| 4:185156258 | rs72699758  | A | G | 0.56 | 2.41E-05 | 0.8196  | 0.1793 | 1.60E-01 | -0.3310 | 0.2336 | 6.00E-02 | -0.3840 | 0.2001 |
| 4:185156853 | rs13119105  | T | G | 0.52 | 2.27E-05 | 0.7594  | 0.1655 | 2.26E-01 | -0.2665 | 0.2186 | 8.86E-02 | -0.3222 | 0.1860 |
| 4:185159929 | rs55799474  | C | T | 0.56 | 3.81E-05 | 0.7511  | 0.1692 | 1.39E-01 | -0.3246 | 0.2116 | 1.15E-01 | -0.3028 | 0.1891 |
| 4:188072816 | rs78740791  | C | G | 0.81 | 1.68E-01 | -0.3802 | 0.2737 | 2.18E-05 | 1.8094  | 0.5079 | 1.83E-01 | 0.3632  | 0.2694 |
| 4:188072863 | rs77449565  | T | C | 0.81 | 1.68E-01 | -0.3802 | 0.2737 | 2.18E-05 | 1.8094  | 0.5079 | 1.83E-01 | 0.3632  | 0.2694 |
| 4:188073063 | rs78937528  | T | C | 0.81 | 1.68E-01 | -0.3802 | 0.2737 | 2.18E-05 | 1.8094  | 0.5079 | 1.83E-01 | 0.3632  | 0.2694 |
| 4:188074208 | rs113546188 | G | A | 0.81 | 1.56E-01 | -0.3974 | 0.2784 | 2.57E-05 | 1.8287  | 0.5150 | 1.73E-01 | 0.3783  | 0.2741 |
| 4:188074282 | rs111470397 | G | A | 0.81 | 1.57E-01 | -0.3975 | 0.2786 | 2.58E-05 | 1.8295  | 0.5152 | 1.73E-01 | 0.3786  | 0.2743 |
| 4:188074434 | rs113298113 | G | C | 0.81 | 1.56E-01 | -0.3998 | 0.2795 | 3.16E-05 | 1.8035  | 0.5100 | 1.67E-01 | 0.3852  | 0.2751 |
| 4:188078040 | rs36047796  | D | R | 0.79 | 6.02E-02 | -0.5550 | 0.2913 | 1.31E-05 | 2.0310  | 0.5386 | 4.71E-01 | 0.2133  | 0.2942 |
| 4:21453446  | rs168583    | A | G | 0.61 | 3.03E-02 | 0.4463  | 0.2021 | 3.18E-02 | -0.4979 | 0.2319 | 4.59E-05 | -0.7893 | 0.1789 |
| 4:22165635  | rs6847773   | G | C | 0.40 | 7.34E-05 | 0.7688  | 0.1809 | 1.90E-02 | -0.6341 | 0.2528 | 8.97E-02 | -0.3441 | 0.1993 |
| 4:29533219  | rs143880255 | R | I | 0.61 | 8.10E-01 | -0.0690 | 0.2872 | 7.85E-01 | 0.1020  | 0.3784 | 2.64E-05 | 1.1049  | 0.2416 |
| 4:31358599  | rs73125237  | A | G | 0.85 | 8.90E-05 | -1.0011 | 0.2388 | 9.64E-02 | 0.6563  | 0.4159 | 1.92E-01 | 0.3502  | 0.2650 |
| 4:4739625   | rs4689929   | G | T | 0.72 | 1.49E-05 | -0.8659 | 0.1840 | 6.22E-03 | 0.7248  | 0.2736 | 1.59E-02 | 0.5041  | 0.2029 |
| 4:4742547   | rs10937890  | T | A | 0.73 | 5.76E-05 | -0.8376 | 0.1939 | 8.06E-03 | 0.7167  | 0.2785 | 2.18E-02 | 0.4954  | 0.2100 |
| 4:54284448  | rs34196016  | R | I | 0.66 | 1.78E-01 | 0.2618  | 0.1931 | 6.80E-01 | -0.0933 | 0.2246 | 5.64E-05 | -0.7274 | 0.1671 |
| 4:54294762  | rs71197022  | R | D | 0.70 | 9.46E-02 | 0.3327  | 0.1969 | 4.07E-01 | -0.1974 | 0.2360 | 5.67E-05 | -0.7483 | 0.1720 |
| 4:54328522  | rs35767390  | R | I | 0.66 | 1.69E-01 | 0.2647  | 0.1911 | 7.76E-01 | -0.0638 | 0.2235 | 3.95E-05 | -0.7334 | 0.1646 |
| 4:54354237  | rs6852422   | G | A | 0.89 | 1.85E-01 | 0.4249  | 0.3190 | 9.46E-01 | 0.0243  | 0.3543 | 4.43E-05 | -1.2156 | 0.2748 |
| 4:54354797  | rs11728872  | C | G | 0.70 | 1.87E-01 | 0.2581  | 0.1946 | 9.46E-01 | 0.0159  | 0.2282 | 2.77E-05 | -0.7584 | 0.1664 |
| 4:54369718  | rs11934906  | G | A | 0.70 | 1.65E-01 | 0.2679  | 0.1918 | 8.81E-01 | 0.0345  | 0.2257 | 2.57E-05 | -0.7512 | 0.1640 |
| 4:54377597  | rs11935144  | T | C | 0.70 | 1.64E-01 | 0.2670  | 0.1906 | 8.68E-01 | 0.0382  | 0.2246 | 2.60E-05 | -0.7461 | 0.1630 |
| 4:5757046   | rs3774873   | C | T | 0.87 | 8.89E-05 | 1.2319  | 0.2938 | 7.37E-01 | -0.1300 | 0.3897 | 4.47E-01 | -0.2522 | 0.3293 |
| 4:67751105  | rs6552041   | G | T | 0.62 | 9.58E-05 | -0.7891 | 0.1892 | 8.37E-01 | 0.0637  | 0.3064 | 4.83E-02 | 0.4151  | 0.2057 |
| 4:67753247  | rs13125049  | C | T | 0.39 | 9.87E-05 | 0.7774  | 0.1868 | 9.06E-01 | -0.0357 | 0.2980 | 5.35E-02 | -0.4007 | 0.2032 |
| 4:67754775  | rs7659876   | G | C | 0.61 | 9.71E-05 | -0.7760 | 0.1862 | 9.05E-01 | 0.0358  | 0.2973 | 5.35E-02 | 0.3996  | 0.2027 |
| 4:67761511  | rs2127947   | G | T | 0.39 | 9.74E-05 | 0.7648  | 0.1836 | 9.05E-01 | -0.0355 | 0.2924 | 5.06E-02 | -0.3988 | 0.1996 |
| 4:67770518  | rs35299043  | R | D | 0.60 | 5.35E-05 | -0.7800 | 0.1797 | 8.60E-01 | 0.0515  | 0.2883 | 3.84E-02 | 0.4165  | 0.1966 |
| 4:73253586  | rs138949703 | R | I | 0.95 | 1.76E-01 | -0.7356 | 0.5407 | 1.99E-01 | 0.9282  | 0.7465 | 8.14E-05 | 1.9992  | 0.4709 |

|             |             |   |   |      |          |         |        |          |         |        |          |         |        |
|-------------|-------------|---|---|------|----------|---------|--------|----------|---------|--------|----------|---------|--------|
| 4:77868402  | rs77308699  | C | A | 0.94 | 5.40E-05 | 1.4303  | 0.3297 | 4.44E-01 | -0.3634 | 0.4645 | 2.50E-01 | -0.4298 | 0.3702 |
| 4:77875918  | rs77580140  | C | T | 0.94 | 5.06E-05 | 1.3752  | 0.3156 | 4.42E-01 | -0.3501 | 0.4460 | 2.20E-01 | -0.4396 | 0.3542 |
| 4:77892042  | rs7674825   | C | T | 0.94 | 4.99E-05 | 1.3655  | 0.3131 | 4.44E-01 | -0.3465 | 0.4427 | 2.19E-01 | -0.4366 | 0.3514 |
| 4:77957813  | rs1127583   | T | A | 0.93 | 8.27E-05 | 1.3662  | 0.3242 | 4.64E-01 | -0.3396 | 0.4558 | 3.06E-01 | -0.3743 | 0.3623 |
| 4:77965703  | rs139528119 | R | D | 0.94 | 7.14E-05 | 1.3835  | 0.3250 | 4.27E-01 | -0.3686 | 0.4539 | 2.69E-01 | -0.4058 | 0.3635 |
| 4:77978180  | rs4252883   | G | C | 0.94 | 7.53E-05 | 1.3894  | 0.3276 | 4.20E-01 | -0.3761 | 0.4562 | 2.70E-01 | -0.4074 | 0.3661 |
| 4:78028143  | rs78721254  | C | T | 0.94 | 9.13E-05 | 1.4759  | 0.3527 | 3.91E-01 | -0.4291 | 0.4869 | 2.82E-01 | -0.4274 | 0.3931 |
| 4:78037888  | rs79683636  | G | A | 0.94 | 9.16E-05 | 1.4786  | 0.3534 | 3.87E-01 | -0.4329 | 0.4872 | 2.85E-01 | -0.4254 | 0.3939 |
| 4:78038200  | rs143992069 | T | C | 0.94 | 9.18E-05 | 1.4786  | 0.3535 | 3.87E-01 | -0.4331 | 0.4872 | 2.85E-01 | -0.4255 | 0.3940 |
| 4:78039036  | rs7682171   | C | A | 0.94 | 9.16E-05 | 1.4785  | 0.3534 | 3.87E-01 | -0.4332 | 0.4871 | 2.85E-01 | -0.4253 | 0.3939 |
| 4:78040139  | rs61287574  | R | I | 0.94 | 8.60E-05 | 1.4868  | 0.3538 | 3.86E-01 | -0.4343 | 0.4872 | 2.86E-01 | -0.4255 | 0.3948 |
| 4:78045463  | rs75298026  | C | T | 0.94 | 9.15E-05 | 1.4807  | 0.3539 | 3.85E-01 | -0.4350 | 0.4871 | 2.93E-01 | -0.4192 | 0.3946 |
| 4:79014017  | rs17418552  | C | T | 0.83 | 5.30E-05 | -0.9770 | 0.2249 | 1.88E-02 | 0.8414  | 0.3799 | 2.43E-01 | 0.2982  | 0.2525 |
| 4:79053555  | rs58118093  | T | C | 0.82 | 9.58E-05 | -0.9566 | 0.2294 | 3.33E-02 | 0.7593  | 0.3754 | 2.91E-01 | 0.2726  | 0.2555 |
| 4:79066261  | rs72654668  | T | C | 0.82 | 8.25E-05 | -0.9814 | 0.2329 | 3.12E-02 | 0.7822  | 0.3825 | 2.67E-01 | 0.2911  | 0.2598 |
| 4:79067375  | rs28542863  | C | A | 0.92 | 8.27E-01 | -0.0820 | 0.3765 | 3.11E-02 | 0.7834  | 0.3828 | 2.66E-01 | 0.2923  | 0.2600 |
| 4:79073650  | rs6848061   | G | T | 0.83 | 7.36E-05 | -0.9949 | 0.2342 | 2.87E-02 | 0.8032  | 0.3874 | 2.53E-01 | 0.3022  | 0.2616 |
| 4:79075183  | rs35967777  | T | G | 0.83 | 7.50E-05 | -0.9972 | 0.2351 | 2.86E-02 | 0.8063  | 0.3885 | 2.52E-01 | 0.3040  | 0.2625 |
| 4:85560000  | rs3840105   | R | I | 0.66 | 5.19E-01 | 0.1522  | 0.2362 | 2.30E-01 | -0.3275 | 0.2739 | 7.02E-05 | -0.8692 | 0.2027 |
| 4:8644328   | rs62288627  | C | T | 0.93 | 6.11E-01 | -0.2114 | 0.4160 | 8.18E-05 | 4.5078  | 2.1385 | 5.32E-01 | 0.2570  | 0.4085 |
| 5:122685727 | rs1047437   | C | G | 0.84 | 3.85E-01 | -0.1960 | 0.2255 | 3.71E-05 | 1.6418  | 0.4739 | 8.10E-02 | 0.3859  | 0.2172 |
| 5:122699812 | rs12522139  | T | G | 0.84 | 4.37E-01 | -0.1757 | 0.2261 | 5.53E-05 | 1.5492  | 0.4520 | 8.13E-02 | 0.3861  | 0.2176 |
| 5:122744178 | rs13154356  | T | C | 0.85 | 3.39E-01 | -0.2190 | 0.2284 | 5.34E-05 | 1.6647  | 0.4874 | 7.32E-02 | 0.4017  | 0.2201 |
| 5:122765884 | rs4073780   | T | G | 0.85 | 2.41E-01 | -0.2742 | 0.2328 | 8.31E-05 | 1.5868  | 0.4742 | 1.72E-01 | 0.3156  | 0.2279 |
| 5:122766724 | rs146812994 | G | A | 0.85 | 2.41E-01 | -0.2742 | 0.2329 | 8.31E-05 | 1.5831  | 0.4725 | 1.71E-01 | 0.3163  | 0.2279 |
| 5:122767863 | rs12521390  | G | T | 0.85 | 2.43E-01 | -0.2734 | 0.2330 | 8.26E-05 | 1.5823  | 0.4720 | 1.69E-01 | 0.3174  | 0.2280 |
| 5:122767933 | rs12521417  | G | C | 0.85 | 2.43E-01 | -0.2734 | 0.2330 | 8.27E-05 | 1.5818  | 0.4719 | 1.69E-01 | 0.3175  | 0.2281 |
| 5:122772373 | rs8180503   | C | G | 0.85 | 2.30E-01 | -0.2839 | 0.2356 | 8.49E-05 | 1.5848  | 0.4714 | 1.72E-01 | 0.3192  | 0.2308 |
| 5:122773605 | rs13167307  | A | G | 0.85 | 2.31E-01 | -0.2836 | 0.2356 | 8.36E-05 | 1.5858  | 0.4713 | 1.71E-01 | 0.3200  | 0.2308 |
| 5:134663997 | rs6877719   | A | G | 0.93 | 4.86E-05 | 2.1092  | 0.4828 | 7.01E-01 | -0.2793 | 0.7188 | 9.51E-01 | -0.0342 | 0.5494 |
| 5:134664085 | rs6877890   | A | C | 0.94 | 2.26E-05 | 2.2179  | 0.4835 | 3.90E-01 | -0.6253 | 0.6998 | 9.20E-01 | -0.0562 | 0.5572 |
| 5:141949123 | rs11744900  | A | G | 0.85 | 9.35E-05 | -1.1443 | 0.2739 | 7.56E-01 | 0.1207  | 0.3965 | 1.19E-01 | 0.4772  | 0.3017 |
| 5:145035449 | rs200376997 | R | I | 0.92 | 3.03E-01 | 0.3522  | 0.3412 | 3.34E-01 | -0.3733 | 0.3744 | 9.79E-05 | -1.2406 | 0.2961 |
| 5:145083153 | rs11741931  | C | G | 0.92 | 1.25E-01 | 0.5465  | 0.3531 | 1.94E-01 | -0.5098 | 0.3726 | 4.71E-05 | -1.3488 | 0.3062 |

|             |             |   |   |      |          |         |        |          |           |          |          |         |        |
|-------------|-------------|---|---|------|----------|---------|--------|----------|-----------|----------|----------|---------|--------|
| 5:145104494 | rs72811547  | T | C | 0.92 | 1.04E-01 | 0.5784  | 0.3526 | 1.68E-01 | -0.5404   | 0.3714   | 1.61E-05 | -1.4187 | 0.3010 |
| 5:156111450 | rs32074     | T | C | 0.94 | 1.96E-01 | 0.5989  | 0.4609 | 8.27E-01 | 0.1101    | 0.5188   | 2.81E-05 | -1.7939 | 0.3938 |
| 5:169691982 | rs202013714 | D | R | 0.66 | 1.19E-05 | 0.9289  | 0.1948 | 4.99E-01 | -0.2059   | 0.3032   | 2.78E-02 | -0.4911 | 0.2175 |
| 5:169692554 | rs2338872   | A | G | 0.55 | 8.78E-05 | 0.6699  | 0.1597 | 1.01E-01 | -0.3980   | 0.2433   | 4.81E-02 | -0.3510 | 0.1738 |
| 5:169696233 | rs315750    | G | C | 0.43 | 2.07E-05 | 0.8027  | 0.1740 | 2.68E-01 | -0.2670   | 0.2429   | 3.85E-01 | -0.1748 | 0.1995 |
| 5:169697707 | rs315745    | A | G | 0.41 | 5.31E-05 | 0.8114  | 0.1868 | 3.25E-01 | -0.2464   | 0.2523   | 4.62E-01 | -0.1566 | 0.2113 |
| 5:169698028 | rs315744    | G | A | 0.43 | 1.93E-05 | 0.8116  | 0.1752 | 2.59E-01 | -0.2742   | 0.2445   | 3.89E-01 | -0.1747 | 0.2011 |
| 5:169701017 | rs36094591  | C | T | 0.55 | 2.27E-06 | 0.8653  | 0.1656 | 5.45E-02 | -0.4874   | 0.2530   | 5.04E-02 | -0.3835 | 0.1919 |
| 5:169704462 | rs34027359  | G | T | 0.54 | 2.89E-06 | 0.8858  | 0.1717 | 4.35E-02 | -0.5291   | 0.2611   | 6.84E-02 | -0.3697 | 0.1990 |
| 5:170196183 | rs111989762 | R | I | 0.65 | 7.24E-05 | 0.8461  | 0.1989 | 3.36E-01 | -0.2578   | 0.2650   | 5.43E-01 | -0.1373 | 0.2241 |
| 5:1801426   | rs13176353  | C | G | 0.70 | 6.57E-02 | -0.4435 | 0.2379 | 4.91E-01 | 0.2374    | 0.3534   | 6.19E-06 | 1.0022  | 0.2012 |
| 5:23633738  | rs60376038  | A | G | 0.94 | 5.05E-02 | -0.8515 | 0.4289 | 9.06E-05 | 32.5726   | 22.2868  | 1.76E-01 | 0.5887  | 0.4292 |
| 5:23634339  | rs78218086  | T | C | 0.94 | 4.98E-02 | -0.8534 | 0.4285 | 8.72E-05 | 34.7942   | 23.9711  | 1.74E-01 | 0.5899  | 0.4288 |
| 5:23634477  | rs77774270  | A | G | 0.94 | 4.98E-02 | -0.8531 | 0.4284 | 8.22E-05 | 36.5227   | 25.0589  | 1.74E-01 | 0.5900  | 0.4287 |
| 5:23638196  | rs58010901  | C | T | 0.94 | 4.64E-02 | -0.8626 | 0.4264 | 4.59E-05 | 83.5779   | 65.4456  | 1.67E-01 | 0.5981  | 0.4269 |
| 5:23640678  | rs12651892  | T | C | 0.94 | 3.49E-02 | -0.8789 | 0.4093 | 6.06E-05 | 81.7952   | 65.8688  | 2.08E-01 | 0.5253  | 0.4128 |
| 5:23644775  | rs141017921 | G | A | 0.94 | 3.53E-02 | -0.8766 | 0.4092 | 4.47E-05 | 164.4920  | 170.4450 | 2.23E-01 | 0.5084  | 0.4130 |
| 5:23645653  | rs114842633 | C | T | 0.94 | 3.47E-02 | -0.8792 | 0.4089 | 5.45E-05 | 102.7510  | 95.0237  | 2.21E-01 | 0.5103  | 0.4127 |
| 5:23646176  | rs9942370   | G | A | 0.94 | 3.42E-02 | -0.8812 | 0.4087 | 7.15E-05 | 75.0835   | 72.7690  | 2.22E-01 | 0.5092  | 0.4126 |
| 5:23649257  | rs16892718  | A | G | 0.94 | 3.41E-02 | -0.8822 | 0.4089 | 5.20E-05 | 55.9141   | 41.3805  | 2.38E-01 | 0.4925  | 0.4133 |
| 5:23649406  | rs76912780  | C | T | 0.94 | 3.47E-02 | -0.8790 | 0.4089 | 6.20E-05 | 88.7696   | 83.3292  | 2.41E-01 | 0.4900  | 0.4132 |
| 5:23684132  | rs16892798  | A | G | 0.94 | 1.19E-02 | -0.9854 | 0.3818 | 4.00E-05 | 1273.0300 | 717.3220 | 2.87E-01 | 0.4227  | 0.3930 |
| 5:38757173  | rs57488025  | T | C | 0.79 | 3.97E-05 | -1.0209 | 0.2306 | 2.73E-02 | 0.7493    | 0.3524   | 2.73E-01 | 0.2885  | 0.2605 |
| 5:38757547  | rs72746044  | G | A | 0.87 | 8.59E-05 | -1.0672 | 0.2539 | 3.10E-02 | 0.9048    | 0.4490   | 3.63E-01 | 0.2606  | 0.2841 |
| 5:38759817  | rs72746051  | G | A | 0.87 | 8.15E-05 | -1.0713 | 0.2540 | 3.02E-02 | 0.9137    | 0.4513   | 3.59E-01 | 0.2628  | 0.2844 |
| 5:38762288  | rs10045504  | C | A | 0.82 | 1.80E-05 | -1.0838 | 0.2329 | 4.49E-02 | 0.6851    | 0.3590   | 1.18E-01 | 0.4189  | 0.2637 |
| 5:38762993  | rs10512692  | G | A | 0.88 | 8.43E-05 | -1.1062 | 0.2629 | 3.00E-02 | 0.9291    | 0.4560   | 3.48E-01 | 0.2781  | 0.2941 |
| 5:38768482  | rs7736938   | A | G | 0.88 | 9.01E-05 | -1.0765 | 0.2570 | 3.04E-02 | 0.9317    | 0.4613   | 3.56E-01 | 0.2671  | 0.2873 |
| 5:4659838   | rs78516850  | R | I | 0.66 | 9.50E-06 | 0.9011  | 0.1865 | 9.59E-01 | -0.0146   | 0.2863   | 4.02E-01 | -0.1831 | 0.2168 |
| 5:4660902   | rs2115525   | A | G | 0.60 | 7.12E-06 | 0.8636  | 0.1758 | 2.46E-01 | -0.3179   | 0.2735   | 4.75E-01 | -0.1478 | 0.2057 |
| 5:4661919   | rs551056882 | R | I | 0.60 | 9.21E-06 | 0.8564  | 0.1769 | 2.57E-01 | -0.3106   | 0.2734   | 4.71E-01 | -0.1497 | 0.2061 |
| 5:4662270   | rs891192    | A | G | 0.60 | 7.67E-06 | 0.8602  | 0.1759 | 2.44E-01 | -0.3188   | 0.2730   | 4.67E-01 | -0.1506 | 0.2055 |
| 5:4662521   | rs891193    | A | T | 0.61 | 5.60E-06 | 0.8882  | 0.1784 | 2.24E-01 | -0.3376   | 0.2763   | 3.11E-01 | -0.2131 | 0.2087 |
| 5:4663383   | rs4701948   | A | G | 0.60 | 9.14E-06 | 0.8538  | 0.1763 | 2.35E-01 | -0.3243   | 0.2719   | 4.40E-01 | -0.1596 | 0.2053 |

|            |             |   |   |      |          |         |        |          |         |        |          |         |        |
|------------|-------------|---|---|------|----------|---------|--------|----------|---------|--------|----------|---------|--------|
| 5:4665369  | rs2399778   | G | T | 0.60 | 1.06E-05 | 0.8438  | 0.1758 | 2.37E-01 | -0.3206 | 0.2701 | 4.31E-01 | -0.1617 | 0.2041 |
| 5:4665670  | rs4370242   | A | G | 0.60 | 1.10E-05 | 0.8417  | 0.1756 | 2.38E-01 | -0.3198 | 0.2697 | 4.30E-01 | -0.1618 | 0.2038 |
| 5:4665967  | rs4397099   | C | A | 0.60 | 1.26E-05 | 0.8346  | 0.1756 | 2.37E-01 | -0.3187 | 0.2686 | 4.21E-01 | -0.1647 | 0.2033 |
| 5:4666164  | rs7726500   | A | G | 0.60 | 1.29E-05 | 0.8337  | 0.1757 | 2.37E-01 | -0.3192 | 0.2685 | 4.20E-01 | -0.1651 | 0.2032 |
| 5:4666170  | rs66559905  | G | A | 0.66 | 1.29E-05 | 0.8810  | 0.1856 | 9.10E-01 | -0.0319 | 0.2801 | 3.36E-01 | -0.2078 | 0.2142 |
| 5:53853890 | rs72750058  | A | G | 0.91 | 5.48E-03 | 0.8341  | 0.2907 | 6.91E-05 | -0.9747 | 0.2164 | 1.61E-01 | -0.4267 | 0.3008 |
| 5:53853975 | rs72750060  | G | A | 0.91 | 5.45E-03 | 0.8346  | 0.2907 | 6.92E-05 | -0.9748 | 0.2164 | 1.61E-01 | -0.4270 | 0.3008 |
| 5:53855263 | rs56211050  | A | G | 0.91 | 5.29E-03 | 0.8382  | 0.2909 | 6.97E-05 | -0.9749 | 0.2166 | 1.60E-01 | -0.4282 | 0.3011 |
| 5:53855468 | rs55989945  | T | C | 0.91 | 5.27E-03 | 0.8387  | 0.2909 | 6.98E-05 | -0.9750 | 0.2166 | 1.60E-01 | -0.4283 | 0.3011 |
| 5:53881925 | rs2548628   | A | G | 0.85 | 2.26E-02 | 0.6472  | 0.2779 | 2.30E-05 | -1.0947 | 0.2366 | 5.55E-02 | -0.5413 | 0.2769 |
| 5:56400390 | rs331060    | T | G | 0.59 | 3.35E-05 | -0.7345 | 0.1641 | 3.01E-01 | 0.2561  | 0.2492 | 1.84E-01 | 0.2488  | 0.1850 |
| 5:56401144 | rs331061    | C | T | 0.59 | 3.28E-05 | -0.7348 | 0.1639 | 3.00E-01 | 0.2567  | 0.2491 | 1.83E-01 | 0.2492  | 0.1849 |
| 5:56401177 | rs150845730 | R | I | 0.66 | 6.73E-05 | -0.8522 | 0.1994 | 4.25E-01 | 0.2307  | 0.2920 | 3.03E-01 | 0.2322  | 0.2235 |
| 5:56401308 | rs331063    | G | C | 0.59 | 3.27E-05 | -0.7350 | 0.1639 | 2.97E-01 | 0.2583  | 0.2490 | 1.82E-01 | 0.2500  | 0.1849 |
| 5:56406503 | rs831833    | T | A | 0.59 | 3.13E-05 | -0.7324 | 0.1629 | 2.86E-01 | 0.2628  | 0.2480 | 1.71E-01 | 0.2544  | 0.1837 |
| 5:56406535 | rs831834    | C | T | 0.59 | 2.70E-05 | -0.7352 | 0.1620 | 2.82E-01 | 0.2645  | 0.2473 | 1.73E-01 | 0.2528  | 0.1832 |
| 5:56406805 | rs831835    | A | T | 0.59 | 2.06E-05 | -0.7516 | 0.1629 | 3.00E-01 | 0.2565  | 0.2491 | 1.75E-01 | 0.2540  | 0.1850 |
| 5:56407479 | rs831836    | C | T | 0.59 | 2.60E-05 | -0.7352 | 0.1616 | 2.80E-01 | 0.2649  | 0.2469 | 1.72E-01 | 0.2530  | 0.1828 |
| 5:56407505 | rs831837    | A | G | 0.59 | 2.61E-05 | -0.7349 | 0.1616 | 2.80E-01 | 0.2653  | 0.2469 | 1.72E-01 | 0.2531  | 0.1828 |
| 5:56407611 | rs831839    | T | C | 0.59 | 2.58E-05 | -0.7347 | 0.1615 | 2.78E-01 | 0.2658  | 0.2468 | 1.71E-01 | 0.2532  | 0.1827 |
| 5:56410116 | rs831841    | G | A | 0.58 | 2.36E-05 | -0.7329 | 0.1602 | 2.71E-01 | 0.2688  | 0.2456 | 1.67E-01 | 0.2541  | 0.1814 |
| 5:56410413 | rs831842    | A | C | 0.58 | 2.36E-05 | -0.7322 | 0.1600 | 2.69E-01 | 0.2694  | 0.2455 | 1.66E-01 | 0.2542  | 0.1812 |
| 5:56411228 | rs831844    | T | A | 0.58 | 2.32E-05 | -0.7315 | 0.1597 | 2.68E-01 | 0.2701  | 0.2452 | 1.65E-01 | 0.2544  | 0.1809 |
| 5:56412285 | rs831846    | A | T | 0.58 | 2.47E-05 | -0.7268 | 0.1593 | 2.57E-01 | 0.2750  | 0.2441 | 1.73E-01 | 0.2490  | 0.1803 |
| 5:56413057 | rs831848    | A | C | 0.58 | 2.25E-05 | -0.7291 | 0.1589 | 2.63E-01 | 0.2719  | 0.2444 | 1.63E-01 | 0.2547  | 0.1800 |
| 5:56415072 | rs831849    | T | C | 0.58 | 2.21E-05 | -0.7275 | 0.1583 | 2.59E-01 | 0.2732  | 0.2439 | 1.61E-01 | 0.2549  | 0.1794 |
| 5:56415596 | rs831850    | C | T | 0.58 | 2.01E-05 | -0.7354 | 0.1591 | 2.61E-01 | 0.2741  | 0.2454 | 1.61E-01 | 0.2567  | 0.1806 |
| 5:56415649 | rs831851    | C | T | 0.58 | 2.21E-05 | -0.7275 | 0.1584 | 2.59E-01 | 0.2732  | 0.2439 | 1.61E-01 | 0.2549  | 0.1795 |
| 5:56415918 | rs831852    | T | G | 0.58 | 2.21E-05 | -0.7275 | 0.1584 | 2.59E-01 | 0.2732  | 0.2439 | 1.61E-01 | 0.2549  | 0.1795 |
| 5:56417472 | rs831854    | A | G | 0.58 | 2.21E-05 | -0.7276 | 0.1584 | 2.59E-01 | 0.2732  | 0.2439 | 1.61E-01 | 0.2549  | 0.1795 |
| 5:56417561 | rs831855    | C | T | 0.58 | 2.21E-05 | -0.7276 | 0.1584 | 2.59E-01 | 0.2732  | 0.2439 | 1.61E-01 | 0.2549  | 0.1795 |
| 5:56418425 | rs331050    | G | A | 0.58 | 2.25E-05 | -0.7273 | 0.1585 | 2.59E-01 | 0.2733  | 0.2441 | 1.60E-01 | 0.2556  | 0.1795 |
| 5:56420434 | rs71602979  | R | I | 0.62 | 1.53E-05 | -0.7787 | 0.1657 | 9.61E-02 | 0.4470  | 0.2691 | 2.36E-01 | 0.2272  | 0.1899 |
| 5:56420468 | rs331052    | T | C | 0.58 | 2.21E-05 | -0.7276 | 0.1584 | 2.59E-01 | 0.2731  | 0.2440 | 1.61E-01 | 0.2550  | 0.1795 |

|            |             |   |   |      |          |         |        |          |        |        |          |        |        |
|------------|-------------|---|---|------|----------|---------|--------|----------|--------|--------|----------|--------|--------|
| 5:56420880 | rs331053    | T | C | 0.58 | 2.21E-05 | -0.7276 | 0.1584 | 2.59E-01 | 0.2731 | 0.2440 | 1.61E-01 | 0.2550 | 0.1795 |
| 5:56421267 | rs331054    | C | A | 0.58 | 2.21E-05 | -0.7276 | 0.1584 | 2.59E-01 | 0.2731 | 0.2440 | 1.61E-01 | 0.2550 | 0.1795 |
| 5:56422894 | rs142251087 | R | D | 0.58 | 2.21E-05 | -0.7275 | 0.1584 | 2.59E-01 | 0.2732 | 0.2439 | 1.61E-01 | 0.2549 | 0.1795 |
| 5:56422960 | rs331055    | C | T | 0.58 | 2.07E-05 | -0.7323 | 0.1588 | 2.60E-01 | 0.2740 | 0.2447 | 1.61E-01 | 0.2560 | 0.1801 |
| 5:56424014 | rs331056    | A | G | 0.58 | 2.21E-05 | -0.7276 | 0.1584 | 2.60E-01 | 0.2731 | 0.2440 | 1.61E-01 | 0.2549 | 0.1795 |
| 5:56425952 | rs331029    | A | G | 0.58 | 2.20E-05 | -0.7281 | 0.1584 | 2.60E-01 | 0.2729 | 0.2441 | 1.61E-01 | 0.2553 | 0.1796 |
| 5:56427689 | rs35753690  | R | I | 0.58 | 2.20E-05 | -0.7282 | 0.1584 | 2.59E-01 | 0.2736 | 0.2440 | 1.61E-01 | 0.2552 | 0.1796 |
| 5:56427777 | rs331028    | A | C | 0.58 | 2.21E-05 | -0.7275 | 0.1583 | 2.59E-01 | 0.2732 | 0.2439 | 1.61E-01 | 0.2549 | 0.1794 |
| 5:56428061 | rs179463    | G | T | 0.58 | 2.21E-05 | -0.7275 | 0.1583 | 2.59E-01 | 0.2732 | 0.2439 | 1.61E-01 | 0.2549 | 0.1794 |
| 5:56428564 | rs331027    | T | C | 0.58 | 2.21E-05 | -0.7275 | 0.1583 | 2.59E-01 | 0.2732 | 0.2439 | 1.61E-01 | 0.2549 | 0.1794 |
| 5:56428724 | rs331026    | T | G | 0.58 | 2.21E-05 | -0.7277 | 0.1584 | 2.60E-01 | 0.2730 | 0.2440 | 1.61E-01 | 0.2551 | 0.1795 |
| 5:56428955 | rs2694490   | T | G | 0.58 | 1.95E-05 | -0.7356 | 0.1589 | 2.58E-01 | 0.2744 | 0.2444 | 1.58E-01 | 0.2580 | 0.1804 |
| 5:56428956 | rs2694489   | T | A | 0.58 | 1.95E-05 | -0.7356 | 0.1589 | 2.58E-01 | 0.2744 | 0.2444 | 1.58E-01 | 0.2580 | 0.1804 |
| 5:56429366 | rs331023    | G | C | 0.58 | 2.07E-05 | -0.7323 | 0.1588 | 2.60E-01 | 0.2740 | 0.2447 | 1.61E-01 | 0.2560 | 0.1801 |
| 5:56429838 | rs34711995  | R | D | 0.58 | 2.48E-05 | -0.7231 | 0.1585 | 2.96E-01 | 0.2508 | 0.2425 | 1.62E-01 | 0.2541 | 0.1793 |
| 5:56429961 | rs331022    | C | A | 0.58 | 2.21E-05 | -0.7275 | 0.1583 | 2.59E-01 | 0.2732 | 0.2439 | 1.61E-01 | 0.2549 | 0.1794 |
| 5:56430330 | rs331021    | C | A | 0.58 | 2.21E-05 | -0.7275 | 0.1583 | 2.59E-01 | 0.2732 | 0.2439 | 1.61E-01 | 0.2549 | 0.1794 |
| 5:56431154 | rs331020    | C | T | 0.58 | 2.19E-05 | -0.7281 | 0.1584 | 2.59E-01 | 0.2734 | 0.2440 | 1.61E-01 | 0.2551 | 0.1795 |
| 5:56432156 | rs191346    | C | T | 0.58 | 2.10E-05 | -0.7339 | 0.1592 | 2.59E-01 | 0.2749 | 0.2454 | 1.64E-01 | 0.2544 | 0.1806 |
| 5:56434286 | rs331018    | A | G | 0.58 | 2.15E-05 | -0.7296 | 0.1585 | 2.59E-01 | 0.2735 | 0.2442 | 1.60E-01 | 0.2556 | 0.1797 |
| 5:56434685 | rs33987444  | R | D | 0.58 | 2.14E-05 | -0.7299 | 0.1586 | 2.59E-01 | 0.2736 | 0.2443 | 1.60E-01 | 0.2557 | 0.1798 |
| 5:56435406 | rs831858    | T | C | 0.58 | 2.13E-05 | -0.7304 | 0.1586 | 2.60E-01 | 0.2736 | 0.2444 | 1.60E-01 | 0.2558 | 0.1798 |
| 5:56435767 | rs831859    | T | C | 0.58 | 2.12E-05 | -0.7305 | 0.1586 | 2.59E-01 | 0.2737 | 0.2444 | 1.60E-01 | 0.2558 | 0.1799 |
| 5:56436119 | rs831860    | T | A | 0.58 | 2.12E-05 | -0.7309 | 0.1587 | 2.60E-01 | 0.2738 | 0.2445 | 1.60E-01 | 0.2560 | 0.1799 |
| 5:56437846 | rs1096605   | T | C | 0.58 | 2.09E-05 | -0.7317 | 0.1587 | 2.59E-01 | 0.2740 | 0.2446 | 1.60E-01 | 0.2562 | 0.1800 |
| 5:56437919 | rs1096606   | G | A | 0.58 | 2.09E-05 | -0.7318 | 0.1587 | 2.59E-01 | 0.2740 | 0.2446 | 1.60E-01 | 0.2563 | 0.1800 |
| 5:56438077 | rs35986638  | R | I | 0.59 | 6.47E-05 | -0.7273 | 0.1697 | 3.67E-01 | 0.2251 | 0.2512 | 1.98E-01 | 0.2467 | 0.1894 |
| 5:56439105 | rs1096608   | C | T | 0.58 | 2.03E-05 | -0.7339 | 0.1589 | 2.60E-01 | 0.2743 | 0.2450 | 1.60E-01 | 0.2570 | 0.1803 |
| 5:56439559 | rs831861    | C | G | 0.58 | 2.03E-05 | -0.7342 | 0.1590 | 2.60E-01 | 0.2744 | 0.2450 | 1.60E-01 | 0.2571 | 0.1804 |
| 5:56439898 | rs1096609   | A | C | 0.58 | 2.02E-05 | -0.7344 | 0.1590 | 2.59E-01 | 0.2745 | 0.2451 | 1.60E-01 | 0.2571 | 0.1804 |
| 5:56441324 | rs1096611   | T | G | 0.58 | 1.96E-05 | -0.7369 | 0.1592 | 2.59E-01 | 0.2751 | 0.2455 | 1.59E-01 | 0.2580 | 0.1808 |
| 5:56441617 | rs1096612   | G | A | 0.58 | 1.91E-05 | -0.7390 | 0.1594 | 2.60E-01 | 0.2752 | 0.2459 | 1.59E-01 | 0.2584 | 0.1811 |
| 5:56442625 | rs1096615   | G | A | 0.58 | 1.94E-05 | -0.7377 | 0.1593 | 2.59E-01 | 0.2753 | 0.2457 | 1.59E-01 | 0.2582 | 0.1809 |
| 5:56442862 | rs1096616   | G | A | 0.58 | 1.94E-05 | -0.7379 | 0.1593 | 2.59E-01 | 0.2753 | 0.2457 | 1.59E-01 | 0.2583 | 0.1809 |

|             |             |   |   |      |          |         |        |          |         |        |          |         |        |
|-------------|-------------|---|---|------|----------|---------|--------|----------|---------|--------|----------|---------|--------|
| 5:56455651  | rs1976569   | A | G | 0.60 | 8.34E-05 | -0.7558 | 0.1795 | 8.39E-01 | 0.0555  | 0.2712 | 8.84E-02 | 0.3419  | 0.1973 |
| 5:56456595  | rs6450419   | C | T | 0.53 | 5.59E-06 | -0.8618 | 0.1731 | 9.84E-01 | 0.0054  | 0.2619 | 8.42E-02 | 0.3498  | 0.1990 |
| 5:56457598  | rs7712889   | T | C | 0.60 | 8.02E-05 | -0.7570 | 0.1793 | 8.38E-01 | 0.0557  | 0.2708 | 9.12E-02 | 0.3389  | 0.1972 |
| 5:56477261  | rs11417693  | R | I | 0.65 | 2.80E-05 | -0.8757 | 0.1934 | 9.47E-01 | 0.0204  | 0.3073 | 6.93E-02 | 0.3995  | 0.2158 |
| 5:56481122  | rs831642    | G | C | 0.60 | 7.63E-05 | -0.7595 | 0.1792 | 8.43E-01 | 0.0542  | 0.2717 | 9.33E-02 | 0.3370  | 0.1974 |
| 5:56482215  | rs34384211  | R | I | 0.65 | 2.11E-05 | -0.8644 | 0.1876 | 1.72E-01 | 0.3906  | 0.2902 | 4.61E-02 | 0.4261  | 0.2090 |
| 5:56482501  | rs864963    | T | C | 0.59 | 2.04E-05 | -0.8107 | 0.1756 | 7.54E-01 | 0.0848  | 0.2691 | 6.88E-02 | 0.3653  | 0.1969 |
| 5:56483713  | rs35653365  | R | D | 0.60 | 7.51E-05 | -0.7613 | 0.1795 | 8.40E-01 | 0.0552  | 0.2725 | 9.09E-02 | 0.3399  | 0.1977 |
| 5:56494467  | rs831650    | A | G | 0.58 | 2.38E-05 | -0.7973 | 0.1743 | 8.77E-01 | -0.0385 | 0.2485 | 9.43E-02 | 0.3333  | 0.1959 |
| 5:56504311  | rs831654    | T | C | 0.60 | 7.17E-05 | -0.7644 | 0.1796 | 8.50E-01 | 0.0518  | 0.2732 | 9.43E-02 | 0.3370  | 0.1981 |
| 5:56504664  | rs1096565   | C | T | 0.60 | 7.18E-05 | -0.7644 | 0.1796 | 8.51E-01 | 0.0515  | 0.2732 | 9.43E-02 | 0.3371  | 0.1981 |
| 5:56512536  | rs6869334   | G | A | 0.60 | 7.03E-05 | -0.7656 | 0.1797 | 8.53E-01 | 0.0511  | 0.2736 | 9.50E-02 | 0.3366  | 0.1982 |
| 5:56515260  | rs5012224   | G | A | 0.52 | 2.61E-05 | -0.8015 | 0.1763 | 9.90E-01 | 0.0033  | 0.2709 | 7.29E-02 | 0.3599  | 0.1970 |
| 5:56516742  | rs77026127  | D | R | 0.60 | 1.39E-05 | -0.8298 | 0.1756 | 7.42E-01 | 0.0901  | 0.2715 | 6.66E-02 | 0.3706  | 0.1981 |
| 5:56538855  | rs12153538  | T | C | 0.60 | 1.21E-05 | -0.8362 | 0.1755 | 7.40E-01 | 0.0912  | 0.2723 | 6.59E-02 | 0.3720  | 0.1984 |
| 5:56544347  | rs2408687   | T | C | 0.60 | 1.30E-05 | -0.8337 | 0.1758 | 7.81E-01 | 0.0763  | 0.2720 | 6.77E-02 | 0.3698  | 0.1985 |
| 5:56574452  | rs4700181   | C | T | 0.61 | 6.44E-05 | -0.7736 | 0.1805 | 8.67E-01 | 0.0466  | 0.2763 | 9.72E-02 | 0.3364  | 0.1995 |
| 5:56596940  | rs185307    | A | G | 0.66 | 7.34E-05 | -0.8742 | 0.2058 | 3.38E-01 | 0.2735  | 0.2996 | 4.16E-01 | 0.1895  | 0.2312 |
| 5:65145584  | rs147731910 | T | C | 0.75 | 4.63E-01 | 0.1729  | 0.2356 | 7.46E-05 | -0.9896 | 0.2391 | 8.97E-02 | -0.3917 | 0.2269 |
| 5:71204261  | rs2879027   | T | G | 0.57 | 3.61E-02 | -0.3540 | 0.1660 | 7.16E-04 | 0.7561  | 0.2220 | 4.31E-05 | 0.6485  | 0.1463 |
| 5:73765232  | rs59074070  | C | T | 0.63 | 2.83E-03 | -0.5398 | 0.1741 | 2.32E-05 | 1.0398  | 0.2640 | 6.57E-01 | 0.0824  | 0.1849 |
| 5:73776280  | rs60150178  | T | C | 0.79 | 8.75E-05 | -0.7979 | 0.1901 | 1.41E-03 | 1.2263  | 0.4391 | 4.89E-01 | 0.1486  | 0.2133 |
| 5:75225918  | rs72770380  | T | C | 0.90 | 9.76E-01 | -0.0080 | 0.2719 | 3.18E-01 | 0.3386  | 0.3403 | 4.37E-05 | 1.0209  | 0.2306 |
| 5:75244122  | rs1404990   | A | T | 0.92 | 3.26E-01 | -0.2872 | 0.2914 | 4.75E-02 | 0.7848  | 0.4254 | 4.23E-05 | 1.1055  | 0.2492 |
| 5:7789175   | rs12656715  | A | G | 0.59 | 9.98E-05 | 0.7620  | 0.1832 | 2.04E-02 | -0.5524 | 0.2340 | 2.83E-01 | -0.2209 | 0.2039 |
| 5:7790217   | rs3816620   | C | A | 0.58 | 6.24E-05 | 0.7604  | 0.1770 | 1.56E-02 | -0.5623 | 0.2288 | 1.60E-01 | -0.2808 | 0.1971 |
| 5:7792171   | rs16879108  | C | G | 0.58 | 6.60E-05 | 0.7599  | 0.1776 | 1.65E-02 | -0.5592 | 0.2297 | 1.61E-01 | -0.2807 | 0.1976 |
| 5:7794503   | rs16879116  | A | G | 0.58 | 7.00E-05 | 0.7593  | 0.1781 | 1.76E-02 | -0.5551 | 0.2307 | 1.62E-01 | -0.2803 | 0.1980 |
| 5:7794694   | rs76946048  | R | D | 0.58 | 6.94E-05 | 0.7583  | 0.1778 | 1.81E-02 | -0.5528 | 0.2306 | 1.63E-01 | -0.2793 | 0.1977 |
| 5:7796625   | rs7728943   | G | A | 0.58 | 6.76E-05 | 0.7636  | 0.1787 | 1.77E-02 | -0.5566 | 0.2317 | 1.57E-01 | -0.2848 | 0.1987 |
| 5:79855876  | rs187262    | C | T | 0.76 | 3.90E-01 | -0.2058 | 0.2391 | 3.03E-02 | 0.6530  | 0.3038 | 9.40E-05 | 0.8690  | 0.2068 |
| 5:9447717   | rs3798028   | G | T | 0.65 | 3.24E-05 | 0.7931  | 0.1768 | 5.90E-01 | -0.1405 | 0.2453 | 8.45E-01 | -0.0398 | 0.2025 |
| 5:9451937   | rs6867962   | C | T | 0.66 | 8.08E-05 | 0.8165  | 0.1935 | 5.00E-01 | -0.1888 | 0.2620 | 8.96E-01 | -0.0286 | 0.2182 |
| 6:104213975 | rs12192060  | A | T | 0.64 | 7.17E-01 | -0.0926 | 0.2560 | 9.72E-01 | -0.0091 | 0.2625 | 3.91E-05 | 0.9675  | 0.2169 |

|             |             |   |   |      |          |         |        |          |          |          |          |         |        |
|-------------|-------------|---|---|------|----------|---------|--------|----------|----------|----------|----------|---------|--------|
| 6:130778955 | rs11154583  | C | A | 0.91 | 5.88E-01 | -0.1758 | 0.3249 | 7.09E-05 | 8.8347   | 9.2401   | 4.54E-01 | 0.2405  | 0.3187 |
| 6:144151026 | rs117010774 | T | A | 0.93 | 5.97E-01 | 0.2086  | 0.3945 | 9.65E-05 | 477.6610 | 361.2880 | 3.99E-01 | 0.3285  | 0.3864 |
| 6:144152872 | rs117055821 | T | G | 0.93 | 5.97E-01 | 0.2086  | 0.3945 | 9.65E-05 | 477.6610 | 361.2880 | 3.99E-01 | 0.3285  | 0.3864 |
| 6:145207218 | rs7762951   | T | C | 0.79 | 9.73E-01 | 0.0082  | 0.2431 | 3.55E-01 | 0.3122   | 0.3475   | 8.07E-05 | -0.8848 | 0.2083 |
| 6:145207267 | rs7742815   | C | G | 0.79 | 9.72E-01 | 0.0085  | 0.2431 | 3.52E-01 | 0.3143   | 0.3476   | 8.20E-05 | -0.8842 | 0.2084 |
| 6:145207301 | rs7743204   | G | A | 0.80 | 7.16E-01 | -0.0887 | 0.2439 | 4.52E-01 | 0.2542   | 0.3476   | 9.05E-05 | -0.8833 | 0.2096 |
| 6:145302412 | rs7742978   | C | G | 0.86 | 6.19E-01 | 0.1409  | 0.2833 | 5.80E-01 | 0.2023   | 0.3764   | 4.00E-05 | -1.0706 | 0.2404 |
| 6:145304007 | rs9373439   | T | C | 0.87 | 6.29E-01 | 0.1398  | 0.2893 | 6.95E-01 | 0.1449   | 0.3795   | 9.63E-05 | -1.0452 | 0.2491 |
| 6:145304099 | rs9386094   | T | G | 0.87 | 6.28E-01 | 0.1399  | 0.2893 | 6.95E-01 | 0.1450   | 0.3795   | 9.63E-05 | -1.0451 | 0.2491 |
| 6:145304594 | rs9373440   | T | C | 0.86 | 6.07E-01 | 0.1453  | 0.2828 | 5.75E-01 | 0.2047   | 0.3760   | 4.04E-05 | -1.0686 | 0.2401 |
| 6:145306013 | rs9399523   | A | G | 0.87 | 6.17E-01 | 0.1442  | 0.2888 | 6.87E-01 | 0.1489   | 0.3792   | 9.84E-05 | -1.0423 | 0.2488 |
| 6:149569618 | rs564507597 | R | D | 0.50 | 4.86E-01 | 0.1461  | 0.2097 | 1.81E-05 | -1.0588  | 0.2568   | 2.37E-02 | -0.4599 | 0.1979 |
| 6:152502217 | rs11439578  | I | R | 0.44 | 1.23E-05 | 0.9516  | 0.1999 | 5.60E-02 | -0.6237  | 0.3203   | 7.25E-01 | 0.0824  | 0.2326 |
| 6:152504123 | rs113956064 | I | R | 0.50 | 1.59E-05 | 0.8265  | 0.1763 | 1.91E-02 | -0.6326  | 0.2686   | 7.68E-01 | -0.0605 | 0.2043 |
| 6:152504874 | rs2813511   | T | A | 0.50 | 1.60E-05 | 0.8256  | 0.1762 | 1.94E-02 | -0.6301  | 0.2683   | 7.67E-01 | -0.0608 | 0.2041 |
| 6:152505056 | rs2813512   | G | T | 0.50 | 1.59E-05 | 0.8256  | 0.1761 | 1.95E-02 | -0.6294  | 0.2682   | 7.67E-01 | -0.0607 | 0.2041 |
| 6:152506734 | rs2813513   | T | C | 0.50 | 1.54E-05 | 0.8251  | 0.1757 | 1.99E-02 | -0.6261  | 0.2677   | 7.58E-01 | -0.0632 | 0.2037 |
| 6:152506825 | rs2813514   | T | G | 0.50 | 1.55E-05 | 0.8250  | 0.1758 | 1.99E-02 | -0.6263  | 0.2677   | 7.56E-01 | -0.0635 | 0.2037 |
| 6:152507116 | rs2635436   | A | G | 0.50 | 1.55E-05 | 0.8245  | 0.1756 | 2.00E-02 | -0.6255  | 0.2676   | 7.54E-01 | -0.0641 | 0.2036 |
| 6:152508197 | rs2763015   | C | A | 0.47 | 2.47E-05 | 0.7417  | 0.1625 | 4.21E-02 | -0.5053  | 0.2496   | 7.38E-01 | -0.0683 | 0.2029 |
| 6:152509307 | rs2635431   | A | T | 0.50 | 1.49E-05 | 0.8221  | 0.1747 | 2.09E-02 | -0.6190  | 0.2668   | 7.27E-01 | -0.0711 | 0.2025 |
| 6:153507300 | rs191150    | A | G | 0.48 | 5.36E-05 | 0.7269  | 0.1675 | 8.18E-02 | -0.3744  | 0.2128   | 6.16E-01 | -0.0958 | 0.1898 |
| 6:153509860 | rs600083    | T | C | 0.48 | 6.25E-05 | 0.7175  | 0.1670 | 8.54E-02 | -0.3688  | 0.2122   | 6.08E-01 | -0.0975 | 0.1888 |
| 6:153523669 | rs316296    | C | G | 0.46 | 5.52E-05 | 0.6831  | 0.1577 | 1.38E-01 | -0.3030  | 0.2031   | 5.44E-01 | -0.1089 | 0.1785 |
| 6:153524338 | rs160784    | A | C | 0.46 | 5.56E-05 | 0.6833  | 0.1578 | 1.38E-01 | -0.3033  | 0.2032   | 5.44E-01 | -0.1091 | 0.1786 |
| 6:153528141 | rs317077    | G | A | 0.48 | 3.30E-05 | 0.7240  | 0.1616 | 1.61E-01 | -0.2939  | 0.2071   | 4.34E-01 | -0.1451 | 0.1841 |
| 6:162170039 | rs1569836   | C | T | 0.69 | 9.31E-02 | 0.4712  | 0.2777 | 6.82E-01 | -0.1356  | 0.3274   | 4.34E-05 | -1.0694 | 0.2414 |
| 6:166109355 | rs12055769  | C | T | 0.84 | 6.12E-05 | -1.2068 | 0.2805 | 2.94E-01 | 0.5377   | 0.5346   | 1.69E-01 | 0.4359  | 0.3127 |
| 6:29646165  | rs396660    | C | T | 0.74 | 1.08E-02 | -0.5665 | 0.2164 | 2.51E-01 | 0.3552   | 0.3110   | 9.94E-05 | 0.8250  | 0.1971 |
| 6:29646879  | rs445150    | T | C | 0.74 | 1.08E-02 | -0.5665 | 0.2164 | 2.51E-01 | 0.3552   | 0.3110   | 9.94E-05 | 0.8250  | 0.1971 |
| 6:29647628  | rs416568    | T | A | 0.78 | 1.52E-02 | -0.5639 | 0.2268 | 1.54E-01 | 0.4134   | 0.2929   | 2.64E-05 | 0.9189  | 0.2010 |
| 6:29648398  | rs365052    | G | C | 0.78 | 1.53E-02 | -0.5637 | 0.2268 | 1.54E-01 | 0.4133   | 0.2930   | 2.64E-05 | 0.9189  | 0.2010 |
| 6:29648506  | rs2747430   | G | A | 0.74 | 1.08E-02 | -0.5665 | 0.2164 | 2.51E-01 | 0.3552   | 0.3110   | 9.94E-05 | 0.8250  | 0.1971 |
| 6:29648564  | rs2747431   | C | T | 0.78 | 1.52E-02 | -0.5639 | 0.2268 | 1.54E-01 | 0.4134   | 0.2929   | 2.64E-05 | 0.9189  | 0.2010 |

|             |             |   |   |      |          |         |        |          |         |        |          |         |        |
|-------------|-------------|---|---|------|----------|---------|--------|----------|---------|--------|----------|---------|--------|
| 6:29654409  | rs3129044   | G | A | 0.80 | 1.08E-02 | -0.6328 | 0.2418 | 1.72E-01 | 0.4192  | 0.3050 | 8.18E-05 | 0.9314  | 0.2195 |
| 6:29740477  | rs1610638   | C | T | 0.88 | 6.36E-03 | -0.8235 | 0.2925 | 8.14E-02 | 0.6825  | 0.3996 | 7.46E-05 | 1.1419  | 0.2674 |
| 6:29742003  | rs1610639   | G | A | 0.88 | 6.26E-03 | -0.8240 | 0.2921 | 8.10E-02 | 0.6829  | 0.3994 | 7.50E-05 | 1.1402  | 0.2671 |
| 6:29771621  | rs1610660   | C | G | 0.88 | 6.37E-03 | -0.8235 | 0.2925 | 8.14E-02 | 0.6826  | 0.3996 | 7.44E-05 | 1.1422  | 0.2674 |
| 6:29902279  | rs9259928   | C | G | 0.85 | 5.43E-03 | -0.8305 | 0.2891 | 1.06E-01 | 0.6239  | 0.3945 | 4.37E-05 | 1.1625  | 0.2626 |
| 6:31315706  | rs9265969   | G | A | 0.92 | 8.27E-02 | -0.6171 | 0.3516 | 1.28E-01 | 0.7122  | 0.4854 | 6.99E-05 | 1.3243  | 0.3087 |
| 6:35044456  | rs2762337   | A | C | 0.50 | 3.48E-01 | -0.1901 | 0.2020 | 7.87E-05 | 0.9275  | 0.2345 | 2.11E-01 | 0.2497  | 0.1974 |
| 6:52556771  | rs11969858  | T | C | 0.76 | 4.04E-02 | 0.4909  | 0.2355 | 6.24E-02 | -0.5398 | 0.2876 | 6.87E-05 | -0.8972 | 0.2089 |
| 6:52558017  | rs6902435   | T | C | 0.76 | 4.02E-02 | 0.4913  | 0.2355 | 6.26E-02 | -0.5393 | 0.2875 | 6.85E-05 | -0.8974 | 0.2089 |
| 6:52560231  | rs11759535  | G | A | 0.76 | 4.02E-02 | 0.4914  | 0.2356 | 6.22E-02 | -0.5404 | 0.2877 | 7.00E-05 | -0.8967 | 0.2090 |
| 6:52560788  | rs6458856   | A | G | 0.76 | 4.04E-02 | 0.4907  | 0.2355 | 6.22E-02 | -0.5402 | 0.2876 | 7.00E-05 | -0.8963 | 0.2089 |
| 6:52563007  | rs70977377  | R | D | 0.82 | 1.30E-01 | -0.5162 | 0.3382 | 5.87E-02 | -0.5511 | 0.2886 | 6.97E-05 | -0.9025 | 0.2103 |
| 6:52563255  | rs9474303   | C | T | 0.76 | 3.98E-02 | 0.4923  | 0.2355 | 6.20E-02 | -0.5407 | 0.2876 | 6.95E-05 | -0.8968 | 0.2090 |
| 6:52564490  | rs10484873  | A | G | 0.76 | 4.10E-02 | 0.4900  | 0.2358 | 6.33E-02 | -0.5389 | 0.2881 | 7.01E-05 | -0.8972 | 0.2092 |
| 6:52564785  | rs62405938  | T | G | 0.76 | 4.06E-02 | 0.4909  | 0.2358 | 6.32E-02 | -0.5391 | 0.2881 | 7.00E-05 | -0.8975 | 0.2092 |
| 6:52566178  | rs62405939  | C | T | 0.76 | 3.96E-02 | 0.4932  | 0.2357 | 6.29E-02 | -0.5396 | 0.2881 | 7.06E-05 | -0.8968 | 0.2092 |
| 6:54648365  | rs62412578  | T | C | 0.93 | 8.87E-01 | 0.0587  | 0.4138 | 5.01E-01 | -0.2957 | 0.4358 | 8.70E-05 | -1.5005 | 0.3551 |
| 6:54650151  | rs62412580  | C | A | 0.93 | 8.73E-01 | 0.0663  | 0.4140 | 4.98E-01 | -0.2979 | 0.4356 | 8.15E-05 | -1.5065 | 0.3549 |
| 6:54660244  | rs79244342  | C | G | 0.93 | 7.60E-01 | 0.1264  | 0.4150 | 4.61E-01 | -0.3236 | 0.4334 | 4.99E-05 | -1.5495 | 0.3531 |
| 6:54664045  | rs62412597  | C | A | 0.93 | 7.27E-01 | 0.1438  | 0.4129 | 4.43E-01 | -0.3354 | 0.4318 | 4.33E-05 | -1.5526 | 0.3505 |
| 6:54669411  | rs12661022  | A | G | 0.94 | 7.25E-01 | 0.1457  | 0.4146 | 4.63E-01 | -0.3215 | 0.4335 | 4.62E-05 | -1.5542 | 0.3524 |
| 6:54670334  | rs73430625  | C | T | 0.93 | 7.20E-01 | 0.1481  | 0.4140 | 4.44E-01 | -0.3368 | 0.4336 | 4.39E-05 | -1.5558 | 0.3515 |
| 6:70814202  | rs6907532   | G | A | 0.67 | 1.43E-02 | -0.4429 | 0.1765 | 1.08E-01 | 0.3502  | 0.2230 | 9.38E-05 | 0.6719  | 0.1599 |
| 6:70816221  | rs59608953  | R | I | 0.52 | 4.33E-05 | 0.7222  | 0.1641 | 5.34E-02 | -0.4581 | 0.2401 | 7.97E-05 | -0.6929 | 0.1630 |
| 6:70832305  | rs3840402   | D | R | 0.67 | 1.36E-02 | -0.4478 | 0.1770 | 1.13E-01 | 0.3477  | 0.2243 | 7.35E-05 | 0.6834  | 0.1599 |
| 6:70833413  | rs9454978   | C | T | 0.66 | 1.88E-02 | -0.4299 | 0.1789 | 1.28E-01 | 0.3352  | 0.2243 | 7.53E-05 | 0.6863  | 0.1608 |
| 6:70858817  | rs5877241   | D | R | 0.66 | 3.57E-02 | -0.3981 | 0.1862 | 1.34E-01 | 0.3567  | 0.2435 | 2.38E-06 | 0.8202  | 0.1563 |
| 6:70858863  | rs2025283   | C | T | 0.68 | 3.48E-02 | -0.3885 | 0.1808 | 1.03E-01 | 0.3779  | 0.2371 | 1.66E-05 | 0.7382  | 0.1569 |
| 6:70861911  | rs11302917  | D | R | 0.69 | 3.68E-02 | -0.3888 | 0.1830 | 9.44E-02 | 0.3961  | 0.2424 | 1.50E-05 | 0.7499  | 0.1584 |
| 6:70870045  | rs9454994   | G | A | 0.70 | 3.86E-02 | -0.3815 | 0.1813 | 9.50E-02 | 0.3920  | 0.2406 | 1.90E-05 | 0.7350  | 0.1575 |
| 6:86150547  | rs373978998 | R | I | 0.86 | 2.33E-02 | 0.6813  | 0.2941 | 3.31E-01 | -0.3351 | 0.3366 | 5.61E-05 | -1.1417 | 0.2622 |
| 6:92123133  | rs78071196  | T | C | 0.95 | 1.01E-01 | -0.8576 | 0.5174 | 8.55E-05 | 4.4222  | 1.8483 | 1.99E-01 | 0.6672  | 0.5134 |
| 7:101562674 | rs17407001  | C | T | 0.90 | 4.31E-01 | -0.2687 | 0.3412 | 9.81E-01 | 0.0092  | 0.4109 | 2.54E-05 | 1.3218  | 0.2883 |
| 7:101568195 | rs35808488  | C | T | 0.90 | 4.38E-01 | -0.2631 | 0.3388 | 9.92E-01 | 0.0039  | 0.4081 | 2.18E-05 | 1.3212  | 0.2855 |

|             |             |   |   |      |          |         |        |          |         |        |          |         |        |
|-------------|-------------|---|---|------|----------|---------|--------|----------|---------|--------|----------|---------|--------|
| 7:103395578 | rs147422867 | R | I | 0.89 | 1.12E-05 | 1.3877  | 0.2900 | 2.15E-01 | -0.4508 | 0.3580 | 5.42E-01 | -0.2069 | 0.3371 |
| 7:103676845 | rs67058168  | R | D | 0.86 | 3.01E-02 | -0.6963 | 0.3151 | 1.46E-02 | 1.1062  | 0.4783 | 9.92E-05 | 1.1827  | 0.2825 |
| 7:103704359 | rs200787519 | C | T | 0.90 | 2.67E-02 | -1.0006 | 0.4426 | 7.36E-02 | 1.1480  | 0.6807 | 3.06E-05 | 1.7655  | 0.3897 |
| 7:11404383  | rs17623238  | G | T | 0.55 | 8.71E-01 | -0.0325 | 0.2010 | 6.23E-01 | -0.1176 | 0.2334 | 9.55E-05 | -0.7251 | 0.1727 |
| 7:13678247  | rs13438397  | T | C | 0.75 | 7.11E-02 | -0.3858 | 0.2111 | 1.05E-01 | 0.5052  | 0.3203 | 6.27E-05 | 0.8013  | 0.1854 |
| 7:148629591 | rs76123998  | C | T | 0.94 | 9.03E-05 | -1.6079 | 0.3839 | 2.34E-01 | 0.7045  | 0.6379 | 3.29E-01 | 0.4225  | 0.4288 |
| 7:148647655 | rs79879124  | A | C | 0.92 | 3.97E-05 | -1.3361 | 0.3018 | 2.20E-01 | 0.6199  | 0.5514 | 3.10E-01 | 0.3500  | 0.3415 |
| 7:148667418 | rs34076499  | G | A | 0.88 | 1.85E-05 | -1.1682 | 0.2515 | 1.96E-01 | 0.4672  | 0.3768 | 4.05E-01 | 0.2424  | 0.2891 |
| 7:148667593 | rs35069049  | T | C | 0.92 | 1.03E-05 | -1.3242 | 0.2753 | 1.91E-01 | 0.6123  | 0.5092 | 2.61E-01 | 0.3612  | 0.3180 |
| 7:154509366 | rs10276166  | C | G | 0.53 | 8.01E-05 | 0.8814  | 0.2087 | 5.63E-01 | -0.1557 | 0.2712 | 2.34E-01 | -0.2797 | 0.2326 |
| 7:24245677  | rs73074503  | C | T | 0.85 | 3.09E-02 | 0.5878  | 0.2673 | 4.33E-05 | -1.0215 | 0.2322 | 6.69E-01 | -0.1177 | 0.2734 |
| 7:24257645  | rs34291079  | R | I | 0.84 | 2.99E-02 | 0.5952  | 0.2689 | 1.67E-05 | -1.0709 | 0.2298 | 5.67E-01 | -0.1583 | 0.2748 |
| 7:24432431  | rs2722390   | G | A | 0.66 | 2.23E-01 | 0.2549  | 0.2081 | 9.97E-05 | -0.7844 | 0.1930 | 2.38E-01 | -0.2439 | 0.2048 |
| 7:28946439  | rs144799702 | C | T | 0.71 | 3.26E-01 | 0.2092  | 0.2123 | 8.07E-05 | -0.8448 | 0.2086 | 1.66E-02 | -0.4940 | 0.2001 |
| 7:29000374  | rs717891    | T | C | 0.67 | 5.66E-03 | -0.5587 | 0.1955 | 9.86E-05 | 1.0702  | 0.2845 | 5.89E-01 | 0.1114  | 0.2052 |
| 7:31243943  | rs177980    | G | A | 0.51 | 6.10E-05 | 0.7741  | 0.1799 | 2.87E-01 | -0.2622 | 0.2428 | 1.64E-01 | -0.2829 | 0.2005 |
| 7:31261967  | rs373352538 | R | D | 0.52 | 5.20E-05 | 0.8544  | 0.1964 | 1.44E-01 | -0.3741 | 0.2545 | 9.77E-02 | -0.3670 | 0.2179 |
| 7:42215217  | rs545191898 | R | I | 0.90 | 4.23E-05 | -1.5279 | 0.3465 | 8.90E-02 | 1.1783  | 0.7787 | 9.68E-01 | -0.0160 | 0.3953 |
| 7:52383136  | rs139611864 | R | I | 0.69 | 8.72E-01 | -0.0439 | 0.2725 | 5.19E-02 | 0.6974  | 0.3490 | 7.62E-05 | 0.9952  | 0.2334 |
| 7:55939374  | rs6958601   | C | T | 0.56 | 3.55E-03 | -0.6278 | 0.2077 | 2.74E-02 | 0.5559  | 0.2511 | 8.42E-05 | 0.8133  | 0.1920 |
| 7:64609834  | rs556658156 | R | D | 0.54 | 5.82E-05 | 0.9059  | 0.2099 | 1.41E-01 | -0.4768 | 0.3261 | 7.55E-02 | -0.4192 | 0.2315 |
| 7:64611403  | rs62455680  | G | A | 0.51 | 9.95E-05 | 0.7977  | 0.1918 | 2.75E-01 | -0.3140 | 0.2737 | 7.57E-02 | -0.3793 | 0.2097 |
| 7:64620389  | rs62455682  | G | C | 0.51 | 8.51E-05 | 0.8052  | 0.1915 | 2.70E-01 | -0.3171 | 0.2737 | 7.44E-02 | -0.3815 | 0.2099 |
| 7:64686829  | rs199794749 | R | D | 0.50 | 9.73E-05 | 0.7716  | 0.1852 | 2.60E-01 | -0.3084 | 0.2625 | 7.73E-02 | -0.3646 | 0.2027 |
| 7:64687855  | rs9769451   | G | A | 0.49 | 8.00E-05 | 0.7723  | 0.1829 | 2.22E-01 | -0.3305 | 0.2606 | 1.44E-01 | -0.3002 | 0.2025 |
| 7:64699988  | rs3983284   | C | A | 0.57 | 5.94E-05 | 0.7735  | 0.1794 | 1.73E-01 | -0.3574 | 0.2514 | 5.21E-02 | -0.3905 | 0.1968 |
| 7:64712708  | rs10252247  | G | A | 0.54 | 4.28E-05 | 0.8029  | 0.1823 | 2.12E-01 | -0.3346 | 0.2558 | 1.80E-02 | -0.4817 | 0.1978 |
| 7:64725199  | rs11760459  | G | A | 0.55 | 8.20E-05 | 0.7735  | 0.1835 | 1.14E-01 | -0.4133 | 0.2520 | 5.36E-02 | -0.3946 | 0.2002 |
| 7:64805015  | rs55843957  | A | G | 0.69 | 9.40E-05 | 0.8095  | 0.1938 | 1.47E-02 | -0.6670 | 0.2770 | 9.94E-02 | -0.3567 | 0.2130 |
| 7:64809792  | rs6948045   | T | C | 0.70 | 6.84E-05 | 0.8277  | 0.1939 | 8.57E-03 | -0.7266 | 0.2817 | 6.88E-02 | -0.3951 | 0.2130 |
| 7:64901271  | rs118049311 | A | G | 0.70 | 8.04E-05 | 0.8127  | 0.1925 | 3.49E-04 | -0.9304 | 0.2584 | 4.46E-02 | -0.4305 | 0.2096 |
| 7:66780745  | rs62466399  | G | A | 0.89 | 2.68E-01 | -0.3979 | 0.3584 | 4.64E-01 | -0.3512 | 0.4747 | 6.75E-05 | 1.3309  | 0.3095 |
| 7:86090323  | rs55811404  | D | R | 0.60 | 1.77E-01 | 0.2773  | 0.2040 | 3.10E-01 | -0.2597 | 0.2536 | 1.75E-05 | -0.8121 | 0.1731 |
| 7:96935922  | rs117665874 | A | T | 0.95 | 4.54E-02 | 0.8764  | 0.4311 | 6.01E-01 | -0.2799 | 0.5261 | 6.72E-05 | -1.6413 | 0.3815 |

|             |             |   |   |      |          |         |        |          |         |        |          |         |        |
|-------------|-------------|---|---|------|----------|---------|--------|----------|---------|--------|----------|---------|--------|
| 8:106507619 | rs2622636   | A | G | 0.69 | 2.30E-01 | 0.2212  | 0.1833 | 6.85E-01 | 0.0919  | 0.2248 | 6.17E-05 | -0.6851 | 0.1584 |
| 8:106509975 | rs2622633   | G | A | 0.69 | 2.35E-01 | 0.2180  | 0.1830 | 6.92E-01 | 0.0895  | 0.2247 | 6.69E-05 | -0.6810 | 0.1583 |
| 8:113394520 | rs535052089 | R | I | 0.68 | 1.13E-01 | -0.3538 | 0.2211 | 2.65E-01 | 0.3021  | 0.2802 | 7.60E-05 | 0.8256  | 0.1936 |
| 8:113659531 | rs149033623 | R | I | 0.75 | 2.13E-02 | 0.4865  | 0.2068 | 1.01E-01 | -0.3605 | 0.2242 | 8.17E-05 | -0.7883 | 0.1857 |
| 8:113663094 | rs372360280 | R | I | 0.80 | 3.74E-02 | 0.5093  | 0.2405 | 4.59E-01 | -0.1968 | 0.2722 | 9.12E-05 | -0.9039 | 0.2146 |
| 8:117400679 | rs57634789  | G | T | 0.84 | 5.47E-02 | 0.4948  | 0.2538 | 7.30E-05 | -0.9200 | 0.2139 | 5.97E-01 | -0.1369 | 0.2572 |
| 8:117415285 | rs11986435  | C | T | 0.82 | 5.84E-02 | 0.5219  | 0.2720 | 4.24E-05 | -1.0095 | 0.2260 | 6.05E-01 | -0.1432 | 0.2754 |
| 8:133983048 | rs10106773  | A | G | 0.78 | 3.30E-01 | -0.2298 | 0.2355 | 1.45E-01 | 0.4413  | 0.3112 | 5.73E-05 | 0.8799  | 0.2023 |
| 8:133983516 | rs72727452  | A | T | 0.78 | 3.30E-01 | -0.2297 | 0.2352 | 1.46E-01 | 0.4394  | 0.3106 | 5.70E-05 | 0.8791  | 0.2021 |
| 8:133983955 | rs72727453  | A | G | 0.78 | 3.30E-01 | -0.2295 | 0.2351 | 1.47E-01 | 0.4376  | 0.3104 | 5.67E-05 | 0.8788  | 0.2020 |
| 8:133984471 | rs77233731  | T | C | 0.78 | 3.40E-01 | -0.2234 | 0.2336 | 1.48E-01 | 0.4327  | 0.3078 | 5.59E-05 | 0.8734  | 0.2005 |
| 8:133985019 | rs1403488   | G | A | 0.78 | 3.89E-01 | -0.2001 | 0.2321 | 1.40E-01 | 0.4388  | 0.3057 | 6.33E-05 | 0.8610  | 0.1994 |
| 8:133985059 | rs1403487   | A | G | 0.78 | 3.89E-01 | -0.2000 | 0.2320 | 1.41E-01 | 0.4370  | 0.3055 | 6.34E-05 | 0.8607  | 0.1993 |
| 8:133985395 | rs2222452   | G | A | 0.78 | 3.89E-01 | -0.2002 | 0.2320 | 1.40E-01 | 0.4388  | 0.3057 | 6.34E-05 | 0.8609  | 0.1993 |
| 8:133985931 | rs28680551  | G | A | 0.78 | 3.90E-01 | -0.1995 | 0.2319 | 1.40E-01 | 0.4386  | 0.3054 | 6.36E-05 | 0.8602  | 0.1992 |
| 8:133986126 | rs56184142  | T | C | 0.78 | 3.86E-01 | -0.2015 | 0.2322 | 1.44E-01 | 0.4347  | 0.3060 | 6.83E-05 | 0.8582  | 0.1997 |
| 8:133986609 | rs6982788   | C | T | 0.78 | 3.91E-01 | -0.1990 | 0.2316 | 1.40E-01 | 0.4371  | 0.3050 | 6.36E-05 | 0.8592  | 0.1990 |
| 8:133986723 | rs1403485   | G | A | 0.78 | 3.91E-01 | -0.1989 | 0.2316 | 1.41E-01 | 0.4367  | 0.3049 | 6.39E-05 | 0.8588  | 0.1990 |
| 8:133986945 | rs1403484   | G | C | 0.77 | 3.03E-01 | -0.2431 | 0.2356 | 1.78E-01 | 0.4067  | 0.3088 | 6.69E-05 | 0.8740  | 0.2031 |
| 8:133987011 | rs2091036   | A | G | 0.78 | 3.90E-01 | -0.2010 | 0.2335 | 1.43E-01 | 0.4367  | 0.3074 | 7.18E-05 | 0.8606  | 0.2010 |
| 8:133988414 | rs6993411   | G | A | 0.77 | 3.15E-01 | -0.2347 | 0.2328 | 1.61E-01 | 0.4182  | 0.3050 | 5.52E-05 | 0.8720  | 0.2000 |
| 8:133988608 | rs7013696   | T | G | 0.78 | 3.96E-01 | -0.1966 | 0.2314 | 1.56E-01 | 0.4207  | 0.3039 | 6.46E-05 | 0.8576  | 0.1988 |
| 8:133989099 | rs33951544  | R | D | 0.78 | 3.96E-01 | -0.1965 | 0.2311 | 1.41E-01 | 0.4352  | 0.3040 | 6.40E-05 | 0.8569  | 0.1985 |
| 8:133989954 | rs9297860   | C | T | 0.78 | 3.98E-01 | -0.1955 | 0.2309 | 1.42E-01 | 0.4335  | 0.3035 | 6.46E-05 | 0.8555  | 0.1983 |
| 8:133990609 | rs10956685  | C | T | 0.78 | 3.98E-01 | -0.1953 | 0.2307 | 1.42E-01 | 0.4325  | 0.3032 | 6.45E-05 | 0.8549  | 0.1982 |
| 8:133992211 | rs10093801  | G | A | 0.78 | 4.09E-01 | -0.1910 | 0.2309 | 1.53E-01 | 0.4210  | 0.3027 | 6.41E-05 | 0.8558  | 0.1983 |
| 8:133994143 | rs10101716  | G | T | 0.78 | 4.04E-01 | -0.1920 | 0.2298 | 1.44E-01 | 0.4286  | 0.3017 | 6.53E-05 | 0.8510  | 0.1975 |
| 8:133994520 | rs10101897  | C | T | 0.78 | 4.03E-01 | -0.1923 | 0.2298 | 1.45E-01 | 0.4279  | 0.3018 | 6.51E-05 | 0.8513  | 0.1975 |
| 8:133995376 | rs28433340  | A | G | 0.78 | 4.03E-01 | -0.1926 | 0.2299 | 1.45E-01 | 0.4279  | 0.3018 | 6.52E-05 | 0.8514  | 0.1975 |
| 8:133996378 | rs56263647  | C | T | 0.78 | 4.02E-01 | -0.1929 | 0.2300 | 1.46E-01 | 0.4270  | 0.3020 | 6.42E-05 | 0.8523  | 0.1975 |
| 8:133998625 | rs528421340 | G | A | 0.79 | 3.18E-01 | -0.2674 | 0.2673 | 1.62E-01 | 0.4799  | 0.3546 | 3.85E-05 | 1.0188  | 0.2282 |
| 8:133998729 | rs60808830  | C | T | 0.77 | 3.23E-01 | -0.2287 | 0.2308 | 1.33E-01 | 0.4442  | 0.3036 | 4.60E-05 | 0.8719  | 0.1976 |
| 8:133999610 | rs142160158 | R | I | 0.77 | 3.54E-01 | -0.2107 | 0.2271 | 1.23E-01 | 0.4486  | 0.2991 | 3.73E-05 | 0.8657  | 0.1935 |
| 8:134002609 | rs10099487  | T | C | 0.78 | 3.89E-01 | -0.1993 | 0.2311 | 1.28E-01 | 0.4555  | 0.3078 | 5.47E-05 | 0.8637  | 0.1980 |

|             |             |   |   |      |          |         |        |          |         |        |          |         |        |
|-------------|-------------|---|---|------|----------|---------|--------|----------|---------|--------|----------|---------|--------|
| 8:134003063 | rs7844859   | C | G | 0.78 | 3.88E-01 | -0.1997 | 0.2312 | 1.28E-01 | 0.4564  | 0.3083 | 5.40E-05 | 0.8648  | 0.1981 |
| 8:134003128 | rs7844761   | A | G | 0.78 | 3.86E-01 | -0.2022 | 0.2328 | 1.75E-01 | 0.4095  | 0.3078 | 5.45E-05 | 0.8703  | 0.1995 |
| 8:134003752 | rs28406375  | C | T | 0.78 | 3.86E-01 | -0.2007 | 0.2312 | 1.25E-01 | 0.4602  | 0.3088 | 5.31E-05 | 0.8657  | 0.1981 |
| 8:134003923 | rs28547062  | T | C | 0.78 | 3.87E-01 | -0.2005 | 0.2313 | 1.26E-01 | 0.4595  | 0.3089 | 5.30E-05 | 0.8660  | 0.1981 |
| 8:134004012 | rs55669707  | C | G | 0.78 | 3.86E-01 | -0.2007 | 0.2313 | 1.26E-01 | 0.4600  | 0.3090 | 5.29E-05 | 0.8661  | 0.1981 |
| 8:134009434 | rs28758516  | G | C | 0.78 | 3.14E-01 | -0.2351 | 0.2327 | 1.07E-01 | 0.4906  | 0.3130 | 3.41E-05 | 0.8922  | 0.1983 |
| 8:134010608 | rs17693464  | G | A | 0.78 | 3.88E-01 | -0.2018 | 0.2337 | 1.57E-01 | 0.4331  | 0.3125 | 4.56E-05 | 0.8817  | 0.1997 |
| 8:134011224 | rs7842044   | T | C | 0.78 | 3.88E-01 | -0.2019 | 0.2338 | 1.57E-01 | 0.4330  | 0.3127 | 4.56E-05 | 0.8818  | 0.1997 |
| 8:134011389 | rs72727479  | G | C | 0.78 | 3.83E-01 | -0.2032 | 0.2325 | 1.14E-01 | 0.4810  | 0.3136 | 4.60E-05 | 0.8766  | 0.1987 |
| 8:134011395 | rs56171639  | G | A | 0.78 | 3.83E-01 | -0.2030 | 0.2325 | 1.14E-01 | 0.4813  | 0.3137 | 4.62E-05 | 0.8765  | 0.1987 |
| 8:134012038 | rs10102602  | A | G | 0.78 | 3.87E-01 | -0.2026 | 0.2339 | 1.55E-01 | 0.4367  | 0.3136 | 4.55E-05 | 0.8825  | 0.1999 |
| 8:134013470 | rs34052396  | R | I | 0.78 | 3.85E-01 | -0.2035 | 0.2340 | 1.52E-01 | 0.4407  | 0.3143 | 4.56E-05 | 0.8828  | 0.1999 |
| 8:134014795 | rs2403911   | C | T | 0.78 | 3.81E-01 | -0.2040 | 0.2326 | 1.09E-01 | 0.4907  | 0.3158 | 4.73E-05 | 0.8759  | 0.1989 |
| 8:13889381  | rs6530707   | C | T | 0.80 | 7.06E-05 | 0.9220  | 0.2164 | 2.88E-02 | -0.5985 | 0.2699 | 5.22E-01 | -0.1569 | 0.2439 |
| 8:13890188  | rs34647371  | G | A | 0.80 | 7.11E-05 | 0.9147  | 0.2148 | 2.94E-02 | -0.5939 | 0.2688 | 5.12E-01 | -0.1595 | 0.2420 |
| 8:13893837  | rs75126334  | C | T | 0.80 | 5.33E-05 | 0.9419  | 0.2169 | 2.55E-02 | -0.6161 | 0.2718 | 4.41E-01 | -0.1901 | 0.2452 |
| 8:14684548  | rs143299274 | G | C | 0.93 | 3.09E-01 | 0.4024  | 0.3949 | 8.67E-05 | -1.3017 | 0.2944 | 7.19E-01 | -0.1414 | 0.3914 |
| 8:14686468  | rs535270610 | R | I | 0.93 | 3.12E-01 | 0.4008  | 0.3956 | 9.19E-05 | -1.3023 | 0.2956 | 6.91E-01 | -0.1566 | 0.3919 |
| 8:14687259  | rs138768888 | R | I | 0.95 | 8.65E-02 | 0.7724  | 0.4456 | 6.03E-05 | -1.3571 | 0.2965 | 3.67E-01 | -0.4063 | 0.4465 |
| 8:14687689  | rs11997535  | T | G | 0.95 | 8.63E-02 | 0.7730  | 0.4457 | 6.03E-05 | -1.3574 | 0.2965 | 3.66E-01 | -0.4065 | 0.4466 |
| 8:14687767  | rs552564510 | R | I | 0.95 | 6.99E-02 | 0.8151  | 0.4440 | 6.68E-05 | -1.3532 | 0.2974 | 3.29E-01 | -0.4389 | 0.4456 |
| 8:14688188  | rs17120379  | T | G | 0.95 | 8.36E-02 | 0.7802  | 0.4458 | 5.74E-05 | -1.3605 | 0.2964 | 3.69E-01 | -0.4046 | 0.4469 |
| 8:14688728  | rs7824647   | G | T | 0.95 | 8.19E-02 | 0.7896  | 0.4487 | 6.27E-05 | -1.3587 | 0.2977 | 3.51E-01 | -0.4225 | 0.4497 |
| 8:14689168  | rs76314409  | T | C | 0.95 | 8.14E-02 | 0.7902  | 0.4482 | 6.20E-05 | -1.3581 | 0.2973 | 3.57E-01 | -0.4172 | 0.4493 |
| 8:14691229  | rs73535030  | T | A | 0.95 | 8.05E-02 | 0.7934  | 0.4488 | 6.24E-05 | -1.3584 | 0.2975 | 3.55E-01 | -0.4197 | 0.4499 |
| 8:14691675  | rs73535031  | A | T | 0.95 | 8.04E-02 | 0.7939  | 0.4489 | 6.24E-05 | -1.3585 | 0.2976 | 3.55E-01 | -0.4197 | 0.4500 |
| 8:14691726  | rs17120394  | T | C | 0.95 | 8.05E-02 | 0.7937  | 0.4489 | 6.24E-05 | -1.3584 | 0.2976 | 3.55E-01 | -0.4193 | 0.4500 |
| 8:14691926  | rs12677960  | A | C | 0.95 | 8.12E-02 | 0.7913  | 0.4486 | 6.20E-05 | -1.3588 | 0.2975 | 3.56E-01 | -0.4188 | 0.4497 |
| 8:14692096  | rs73535033  | A | C | 0.95 | 8.48E-02 | 0.7787  | 0.4468 | 6.08E-05 | -1.3582 | 0.2969 | 3.63E-01 | -0.4103 | 0.4477 |
| 8:14692456  | rs6999273   | C | A | 0.93 | 2.51E-01 | 0.4612  | 0.4004 | 6.78E-05 | -1.3310 | 0.2973 | 6.24E-01 | -0.1958 | 0.3975 |
| 8:14692823  | rs6530809   | A | T | 0.95 | 8.19E-02 | 0.7911  | 0.4495 | 6.31E-05 | -1.3602 | 0.2982 | 3.49E-01 | -0.4254 | 0.4505 |
| 8:14692938  | rs7830186   | C | T | 0.95 | 8.23E-02 | 0.7916  | 0.4505 | 6.40E-05 | -1.3628 | 0.2990 | 3.63E-01 | -0.4138 | 0.4516 |
| 8:15387804  | rs13273455  | C | G | 0.61 | 8.76E-05 | 0.6430  | 0.1532 | 4.60E-02 | -0.4402 | 0.2186 | 6.99E-04 | -0.5591 | 0.1559 |
| 8:15469237  | rs1366667   | G | A | 0.67 | 9.27E-05 | -0.8237 | 0.1970 | 1.21E-01 | 0.4246  | 0.2757 | 2.31E-02 | 0.4948  | 0.2119 |

|            |             |   |   |      |          |         |        |          |         |        |          |         |        |
|------------|-------------|---|---|------|----------|---------|--------|----------|---------|--------|----------|---------|--------|
| 8:15469662 | rs13249988  | A | T | 0.67 | 9.09E-05 | -0.8219 | 0.1963 | 1.18E-01 | 0.4263  | 0.2749 | 2.30E-02 | 0.4934  | 0.2112 |
| 8:15470729 | rs17577614  | A | G | 0.47 | 2.04E-05 | 0.7975  | 0.1727 | 3.36E-02 | -0.5705 | 0.2683 | 9.23E-03 | -0.5062 | 0.1878 |
| 8:15474579 | rs17612219  | A | G | 0.65 | 5.10E-05 | -0.8146 | 0.1870 | 1.64E-01 | 0.3664  | 0.2647 | 7.30E-02 | 0.3776  | 0.2067 |
| 8:15474869 | rs80095027  | G | A | 0.65 | 4.98E-05 | -0.8153 | 0.1869 | 1.65E-01 | 0.3653  | 0.2647 | 7.27E-02 | 0.3778  | 0.2067 |
| 8:15475002 | rs12547644  | A | T | 0.67 | 8.02E-05 | -0.8218 | 0.1946 | 1.18E-01 | 0.4222  | 0.2726 | 2.09E-02 | 0.4977  | 0.2095 |
| 8:15476922 | rs13281940  | G | A | 0.65 | 4.89E-05 | -0.8160 | 0.1868 | 1.61E-01 | 0.3685  | 0.2647 | 7.16E-02 | 0.3792  | 0.2066 |
| 8:15479013 | rs35411066  | R | D | 0.65 | 4.97E-05 | -0.8137 | 0.1865 | 1.58E-01 | 0.3705  | 0.2642 | 7.10E-02 | 0.3792  | 0.2061 |
| 8:15479074 | rs6988217   | A | T | 0.65 | 4.96E-05 | -0.8136 | 0.1865 | 1.58E-01 | 0.3706  | 0.2641 | 7.10E-02 | 0.3792  | 0.2061 |
| 8:15480039 | rs1429079   | A | G | 0.65 | 4.89E-05 | -0.8130 | 0.1862 | 1.55E-01 | 0.3722  | 0.2637 | 7.02E-02 | 0.3797  | 0.2058 |
| 8:15484801 | rs13275624  | C | T | 0.67 | 7.67E-05 | -0.8182 | 0.1932 | 1.08E-01 | 0.4290  | 0.2698 | 1.65E-02 | 0.5120  | 0.2073 |
| 8:15485371 | rs11777204  | G | C | 0.65 | 4.56E-05 | -0.8111 | 0.1849 | 1.46E-01 | 0.3771  | 0.2616 | 6.05E-02 | 0.3910  | 0.2042 |
| 8:15486898 | rs13260667  | C | T | 0.65 | 4.52E-05 | -0.8113 | 0.1848 | 1.44E-01 | 0.3788  | 0.2614 | 5.95E-02 | 0.3924  | 0.2040 |
| 8:15487674 | rs9693652   | T | A | 0.65 | 4.30E-05 | -0.8135 | 0.1847 | 1.42E-01 | 0.3819  | 0.2619 | 6.45E-02 | 0.3853  | 0.2043 |
| 8:15487843 | rs35130332  | A | G | 0.53 | 6.26E-05 | 0.7518  | 0.1750 | 3.43E-01 | -0.2428 | 0.2586 | 1.30E-02 | -0.4813 | 0.1878 |
| 8:15487936 | rs9694476   | G | C | 0.65 | 4.34E-05 | -0.8124 | 0.1846 | 1.44E-01 | 0.3790  | 0.2612 | 5.91E-02 | 0.3927  | 0.2039 |
| 8:15488656 | rs1864236   | C | A | 0.65 | 4.31E-05 | -0.8123 | 0.1845 | 1.38E-01 | 0.3838  | 0.2611 | 5.81E-02 | 0.3940  | 0.2038 |
| 8:15490890 | rs9650388   | T | A | 0.66 | 7.34E-05 | -0.8174 | 0.1924 | 1.07E-01 | 0.4290  | 0.2686 | 1.63E-02 | 0.5112  | 0.2066 |
| 8:15491989 | rs12541025  | G | A | 0.66 | 7.13E-05 | -0.8167 | 0.1919 | 9.85E-02 | 0.4384  | 0.2683 | 1.58E-02 | 0.5126  | 0.2060 |
| 8:15492991 | rs35965940  | C | G | 0.65 | 4.48E-05 | -0.8126 | 0.1850 | 1.46E-01 | 0.3773  | 0.2612 | 5.88E-02 | 0.3938  | 0.2043 |
| 8:15505952 | rs7012084   | T | C | 0.67 | 7.94E-05 | -0.8016 | 0.1897 | 8.03E-02 | 0.4601  | 0.2672 | 4.68E-02 | 0.4201  | 0.2067 |
| 8:15506023 | rs6992252   | C | G | 0.67 | 7.94E-05 | -0.8017 | 0.1897 | 8.03E-02 | 0.4601  | 0.2672 | 4.69E-02 | 0.4200  | 0.2068 |
| 8:15506440 | rs34689098  | T | C | 0.67 | 7.92E-05 | -0.8017 | 0.1897 | 8.02E-02 | 0.4602  | 0.2672 | 4.69E-02 | 0.4199  | 0.2067 |
| 8:15508200 | rs1035972   | T | C | 0.67 | 8.50E-05 | -0.8020 | 0.1907 | 7.90E-02 | 0.4626  | 0.2675 | 4.68E-02 | 0.4219  | 0.2076 |
| 8:15513987 | rs35199368  | G | C | 0.67 | 8.42E-05 | -0.8026 | 0.1907 | 7.35E-02 | 0.4711  | 0.2676 | 4.61E-02 | 0.4232  | 0.2076 |
| 8:15569376 | rs10102177  | T | G | 0.63 | 2.30E-05 | -0.8076 | 0.1762 | 6.83E-02 | 0.4596  | 0.2545 | 4.33E-02 | 0.4048  | 0.1959 |
| 8:15576035 | rs1421254   | G | C | 0.64 | 3.26E-05 | -0.8032 | 0.1791 | 6.51E-02 | 0.4668  | 0.2557 | 4.31E-02 | 0.4095  | 0.1979 |
| 8:15596335 | rs2017708   | G | T | 0.64 | 6.04E-05 | -0.8022 | 0.1863 | 4.23E-02 | 0.5261  | 0.2630 | 4.98E-02 | 0.4092  | 0.2042 |
| 8:15608896 | rs751687    | A | G | 0.48 | 8.26E-05 | 0.7408  | 0.1758 | 2.83E-02 | -0.5749 | 0.2608 | 1.20E-01 | -0.3063 | 0.1941 |
| 8:15628324 | rs7842027   | G | A | 0.47 | 5.01E-05 | 0.7615  | 0.1747 | 1.04E-02 | -0.6567 | 0.2543 | 1.13E-01 | -0.3129 | 0.1943 |
| 8:15629658 | rs12682188  | T | C | 0.50 | 8.25E-06 | 0.8264  | 0.1696 | 1.01E-03 | -0.8472 | 0.2508 | 6.06E-02 | -0.3691 | 0.1928 |
| 8:15631755 | rs137982947 | R | D | 0.50 | 1.51E-05 | 0.8125  | 0.1728 | 9.34E-04 | -0.8540 | 0.2512 | 6.51E-02 | -0.3660 | 0.1946 |
| 8:15633195 | rs72359824  | R | D | 0.57 | 3.87E-05 | 0.8504  | 0.1918 | 5.72E-02 | -0.5232 | 0.2813 | 9.74E-03 | -0.5523 | 0.2065 |
| 8:1925843  | rs7386187   | C | G | 0.80 | 3.61E-01 | 0.2538  | 0.2774 | 1.83E-02 | -0.8634 | 0.3559 | 6.02E-05 | -1.0327 | 0.2383 |
| 8:1925864  | rs11365795  | D | R | 0.80 | 3.63E-01 | 0.2528  | 0.2777 | 1.81E-02 | -0.8654 | 0.3562 | 5.56E-05 | -1.0379 | 0.2382 |

|            |             |   |   |      |          |         |        |          |         |        |          |         |        |
|------------|-------------|---|---|------|----------|---------|--------|----------|---------|--------|----------|---------|--------|
| 8:1926880  | rs11782830  | T | G | 0.80 | 3.51E-01 | 0.2605  | 0.2786 | 2.65E-02 | -0.8177 | 0.3596 | 3.77E-05 | -1.0619 | 0.2376 |
| 8:1926888  | rs11136450  | A | G | 0.80 | 3.51E-01 | 0.2606  | 0.2787 | 2.65E-02 | -0.8178 | 0.3596 | 3.76E-05 | -1.0621 | 0.2376 |
| 8:1926911  | rs11776183  | G | C | 0.80 | 3.37E-01 | 0.2667  | 0.2770 | 1.77E-02 | -0.8660 | 0.3556 | 3.76E-05 | -1.0564 | 0.2363 |
| 8:1926917  | rs11782860  | C | G | 0.80 | 3.37E-01 | 0.2666  | 0.2770 | 1.77E-02 | -0.8660 | 0.3555 | 3.79E-05 | -1.0559 | 0.2363 |
| 8:1926958  | rs13271843  | T | C | 0.80 | 3.40E-01 | 0.2643  | 0.2763 | 1.77E-02 | -0.8651 | 0.3552 | 3.97E-05 | -1.0507 | 0.2358 |
| 8:1927012  | rs33962631  | D | R | 0.80 | 3.39E-01 | 0.2643  | 0.2762 | 1.74E-02 | -0.8666 | 0.3549 | 3.87E-05 | -1.0516 | 0.2357 |
| 8:1927209  | rs12675904  | G | C | 0.80 | 3.39E-01 | 0.2646  | 0.2762 | 1.74E-02 | -0.8673 | 0.3549 | 3.83E-05 | -1.0521 | 0.2356 |
| 8:1927244  | rs12678015  | G | A | 0.80 | 3.35E-01 | 0.2666  | 0.2762 | 1.70E-02 | -0.8701 | 0.3551 | 3.56E-05 | -1.0562 | 0.2354 |
| 8:1927353  | rs12679875  | C | G | 0.80 | 3.36E-01 | 0.2661  | 0.2762 | 1.71E-02 | -0.8697 | 0.3550 | 3.63E-05 | -1.0551 | 0.2355 |
| 8:1927410  | rs12679898  | A | G | 0.80 | 3.34E-01 | 0.2672  | 0.2762 | 1.69E-02 | -0.8711 | 0.3551 | 3.48E-05 | -1.0575 | 0.2353 |
| 8:1927524  | rs11779933  | C | A | 0.80 | 3.34E-01 | 0.2675  | 0.2762 | 1.69E-02 | -0.8716 | 0.3551 | 3.44E-05 | -1.0579 | 0.2353 |
| 8:1927576  | rs13274738  | C | A | 0.80 | 3.34E-01 | 0.2676  | 0.2763 | 1.69E-02 | -0.8717 | 0.3552 | 3.43E-05 | -1.0582 | 0.2353 |
| 8:1927617  | rs13278691  | A | G | 0.80 | 3.34E-01 | 0.2677  | 0.2763 | 1.68E-02 | -0.8718 | 0.3552 | 3.42E-05 | -1.0583 | 0.2353 |
| 8:1927799  | rs11777154  | G | C | 0.80 | 3.33E-01 | 0.2680  | 0.2763 | 1.68E-02 | -0.8724 | 0.3552 | 3.37E-05 | -1.0591 | 0.2352 |
| 8:1927821  | rs11781392  | C | T | 0.80 | 3.33E-01 | 0.2681  | 0.2763 | 1.68E-02 | -0.8725 | 0.3552 | 3.36E-05 | -1.0593 | 0.2352 |
| 8:1927822  | rs11783857  | C | G | 0.80 | 3.33E-01 | 0.2682  | 0.2763 | 1.68E-02 | -0.8725 | 0.3552 | 3.37E-05 | -1.0592 | 0.2353 |
| 8:1927828  | rs11781393  | C | T | 0.80 | 3.33E-01 | 0.2681  | 0.2763 | 1.68E-02 | -0.8725 | 0.3553 | 3.39E-05 | -1.0589 | 0.2353 |
| 8:1927947  | rs11783884  | A | G | 0.80 | 3.33E-01 | 0.2680  | 0.2764 | 1.69E-02 | -0.8725 | 0.3555 | 3.48E-05 | -1.0582 | 0.2355 |
| 8:1928033  | rs34929443  | G | A | 0.80 | 3.34E-01 | 0.2678  | 0.2766 | 1.69E-02 | -0.8726 | 0.3558 | 3.58E-05 | -1.0575 | 0.2358 |
| 8:1928054  | rs17064479  | G | C | 0.80 | 3.35E-01 | 0.2676  | 0.2767 | 1.70E-02 | -0.8724 | 0.3559 | 3.61E-05 | -1.0572 | 0.2358 |
| 8:1928333  | rs34806713  | A | T | 0.80 | 3.33E-01 | 0.2684  | 0.2769 | 1.70E-02 | -0.8729 | 0.3562 | 3.69E-05 | -1.0570 | 0.2361 |
| 8:1928424  | rs9657383   | C | T | 0.80 | 3.35E-01 | 0.2673  | 0.2768 | 1.71E-02 | -0.8724 | 0.3562 | 3.76E-05 | -1.0558 | 0.2361 |
| 8:1928444  | rs9657384   | T | G | 0.80 | 3.35E-01 | 0.2674  | 0.2769 | 1.71E-02 | -0.8725 | 0.3563 | 3.77E-05 | -1.0557 | 0.2362 |
| 8:1928577  | rs9657385   | G | C | 0.80 | 3.35E-01 | 0.2677  | 0.2770 | 1.72E-02 | -0.8727 | 0.3566 | 3.88E-05 | -1.0549 | 0.2364 |
| 8:1928921  | rs10102560  | C | G | 0.80 | 3.37E-01 | 0.2671  | 0.2775 | 1.72E-02 | -0.8742 | 0.3572 | 4.27E-05 | -1.0516 | 0.2372 |
| 8:1928953  | rs10102569  | C | G | 0.80 | 3.37E-01 | 0.2671  | 0.2774 | 1.72E-02 | -0.8740 | 0.3572 | 4.26E-05 | -1.0516 | 0.2371 |
| 8:1929523  | rs7387430   | C | T | 0.81 | 4.18E-01 | 0.2263  | 0.2794 | 4.63E-02 | -0.7564 | 0.3673 | 2.55E-05 | -1.0824 | 0.2362 |
| 8:1929596  | rs7387163   | C | A | 0.80 | 3.39E-01 | 0.2661  | 0.2775 | 1.76E-02 | -0.8712 | 0.3574 | 4.45E-05 | -1.0495 | 0.2373 |
| 8:23433511 | rs12545866  | A | C | 0.63 | 2.99E-02 | -0.3985 | 0.1800 | 7.23E-01 | 0.0794  | 0.2309 | 5.41E-05 | 0.6974  | 0.1598 |
| 8:25968591 | rs2976330   | T | C | 0.45 | 3.76E-05 | 0.8590  | 0.1933 | 2.74E-01 | -0.3072 | 0.2775 | 2.17E-01 | -0.2724 | 0.2180 |
| 8:27112733 | rs573832758 | R | I | 0.84 | 3.54E-05 | 1.0650  | 0.2388 | 7.40E-02 | -0.5343 | 0.2735 | 1.31E-01 | -0.4107 | 0.2677 |
| 8:27424988 | rs1532275   | G | A | 0.93 | 2.78E-01 | 0.4154  | 0.3814 | 1.25E-01 | -0.6702 | 0.4193 | 7.28E-05 | -1.4105 | 0.3297 |
| 8:27444277 | rs881146    | A | G | 0.93 | 2.64E-01 | 0.4335  | 0.3866 | 1.23E-01 | -0.6822 | 0.4239 | 6.28E-05 | -1.4415 | 0.3336 |
| 8:30583904 | rs8190893   | C | T | 0.94 | 1.04E-01 | 0.7794  | 0.4742 | 6.17E-01 | 0.2847  | 0.5745 | 8.89E-05 | -1.7581 | 0.4167 |

|            |             |   |   |      |          |         |        |          |          |          |          |         |        |
|------------|-------------|---|---|------|----------|---------|--------|----------|----------|----------|----------|---------|--------|
| 8:57690127 | rs10543737  | D | R | 0.52 | 8.42E-05 | -0.7290 | 0.1732 | 5.35E-03 | 0.6106   | 0.2091   | 2.98E-02 | 0.4174  | 0.1873 |
| 8:67369551 | rs34743572  | R | I | 0.75 | 8.98E-05 | -1.1095 | 0.2648 | 2.84E-01 | 0.4207   | 0.3928   | 1.26E-01 | 0.4532  | 0.2922 |
| 8:6907268  | rs114300314 | C | G | 0.88 | 8.25E-02 | 0.4779  | 0.2722 | 4.46E-05 | -1.0466  | 0.2348   | 4.62E-01 | -0.2026 | 0.2735 |
| 8:6913125  | rs45613133  | C | A | 0.88 | 1.83E-01 | 0.3909  | 0.2918 | 8.15E-05 | -1.1039  | 0.2578   | 5.57E-01 | -0.1716 | 0.2905 |
| 8:6915645  | rs80104006  | A | G | 0.86 | 1.58E-01 | 0.4295  | 0.3022 | 1.84E-05 | -1.2392  | 0.2743   | 5.88E-01 | -0.1644 | 0.3016 |
| 8:69732284 | rs2958329   | G | A | 0.46 | 2.66E-05 | -0.7305 | 0.1608 | 1.72E-01 | 0.3223   | 0.2392   | 1.30E-02 | 0.4487  | 0.1751 |
| 8:69732811 | rs12155640  | C | G | 0.42 | 5.01E-07 | -0.8729 | 0.1550 | 4.43E-01 | -0.2960  | 0.3846   | 7.98E-01 | -0.0709 | 0.2756 |
| 8:69737609 | rs2978235   | C | T | 0.42 | 4.93E-07 | -0.8658 | 0.1536 | 1.17E-01 | 0.3937   | 0.2536   | 6.14E-02 | 0.3495  | 0.1832 |
| 8:69741018 | rs2978234   | A | G | 0.42 | 4.37E-07 | -0.8609 | 0.1519 | 1.16E-01 | 0.3897   | 0.2504   | 5.69E-02 | 0.3524  | 0.1813 |
| 8:69741316 | rs2978233   | G | A | 0.43 | 4.15E-07 | -0.8597 | 0.1513 | 1.18E-01 | 0.3872   | 0.2498   | 5.65E-02 | 0.3518  | 0.1807 |
| 8:74383408 | rs35701266  | R | I | 0.80 | 1.91E-01 | -0.4138 | 0.3148 | 9.82E-05 | 1.5758   | 0.4281   | 7.74E-01 | 0.0906  | 0.3140 |
| 8:75049687 | rs61637679  | D | R | 0.58 | 9.70E-03 | -0.4841 | 0.1820 | 1.51E-02 | 0.6154   | 0.2395   | 8.49E-05 | 0.7011  | 0.1656 |
| 8:98910894 | rs72675237  | C | T | 0.93 | 2.58E-01 | -0.4550 | 0.4006 | 7.42E-05 | 37.5170  | 2.23E+07 | 3.34E-01 | 0.3851  | 0.3951 |
| 8:98911550 | rs72675238  | T | C | 0.93 | 2.57E-01 | -0.4556 | 0.4007 | 7.43E-05 | 11.1491  | 74.3286  | 3.34E-01 | 0.3854  | 0.3952 |
| 8:98911571 | rs72675240  | C | T | 0.93 | 2.58E-01 | -0.4549 | 0.4009 | 7.15E-05 | 28.2744  | 113.2900 | 3.34E-01 | 0.3851  | 0.3953 |
| 8:98913979 | rs72675242  | G | A | 0.93 | 2.54E-01 | -0.4584 | 0.4004 | 7.56E-05 | 8.7473   | 22.5776  | 3.33E-01 | 0.3857  | 0.3950 |
| 8:98915478 | rs149199242 | R | D | 0.93 | 2.54E-01 | -0.4587 | 0.4003 | 5.62E-05 | 175.7990 | 241.3660 | 3.33E-01 | 0.3856  | 0.3949 |
| 8:98915826 | rs4734378   | A | G | 0.93 | 2.54E-01 | -0.4584 | 0.4003 | 6.36E-05 | 170.8840 | 316.1490 | 3.33E-01 | 0.3856  | 0.3949 |
| 8:98917056 | rs11430670  | R | I | 0.93 | 2.53E-01 | -0.4593 | 0.4004 | 5.81E-05 | 153.7750 | 230.8140 | 3.33E-01 | 0.3853  | 0.3949 |
| 8:98917058 | rs78374144  | T | A | 0.93 | 2.53E-01 | -0.4593 | 0.4004 | 5.81E-05 | 153.7750 | 230.8140 | 3.33E-01 | 0.3853  | 0.3949 |
| 8:98917811 | rs4735508   | G | A | 0.93 | 2.54E-01 | -0.4582 | 0.4004 | 7.53E-05 | 8.8780   | 23.6598  | 3.33E-01 | 0.3857  | 0.3950 |
| 8:98918056 | rs111687902 | T | A | 0.93 | 2.58E-01 | -0.4553 | 0.4007 | 4.75E-05 | 569.2470 | 634.0790 | 3.34E-01 | 0.3850  | 0.3952 |
| 8:98919268 | rs113625770 | G | A | 0.93 | 2.57E-01 | -0.4563 | 0.4007 | 5.61E-05 | 266.6210 | 383.8000 | 3.34E-01 | 0.3850  | 0.3952 |
| 8:98919626 | rs147020105 | A | G | 0.93 | 2.58E-01 | -0.4553 | 0.4007 | 4.75E-05 | 569.2470 | 634.0790 | 3.34E-01 | 0.3850  | 0.3952 |
| 8:98920951 | rs112018057 | C | T | 0.93 | 2.58E-01 | -0.4553 | 0.4007 | 4.75E-05 | 569.2470 | 634.0790 | 3.34E-01 | 0.3850  | 0.3952 |
| 8:98927810 | rs72675251  | G | A | 0.93 | 2.57E-01 | -0.4560 | 0.4005 | 7.42E-05 | 35.9150  | 1.78E+07 | 3.33E-01 | 0.3854  | 0.3950 |
| 8:98927849 | rs72675254  | T | C | 0.93 | 2.58E-01 | -0.4548 | 0.4007 | 8.06E-05 | 7.0867   | 9.8132   | 3.30E-01 | 0.3884  | 0.3951 |
| 8:98930702 | rs753800    | A | G | 0.93 | 2.56E-01 | -0.4562 | 0.4005 | 7.42E-05 | 40.8971  | 2.14E+07 | 3.33E-01 | 0.3855  | 0.3950 |
| 9:12287198 | rs10465038  | T | C | 0.71 | 3.21E-05 | 1.0848  | 0.2417 | 6.91E-02 | -0.5939  | 0.3346   | 8.38E-02 | -0.4747 | 0.2697 |
| 9:12287871 | rs1416582   | G | C | 0.72 | 7.71E-05 | 1.0264  | 0.2424 | 1.35E-01 | -0.4853  | 0.3339   | 7.24E-02 | -0.4869 | 0.2660 |
| 9:12288078 | rs10960566  | A | G | 0.70 | 5.03E-05 | 1.0668  | 0.2447 | 1.02E-01 | -0.5117  | 0.3226   | 1.38E-01 | -0.4107 | 0.2730 |
| 9:12289527 | rs7020196   | T | C | 0.56 | 7.89E-05 | 0.8841  | 0.2091 | 1.40E-01 | -0.4172  | 0.2816   | 1.62E-02 | -0.5557 | 0.2243 |
| 9:12290310 | rs12551805  | T | C | 0.71 | 2.20E-05 | 1.0586  | 0.2303 | 1.29E-01 | -0.4882  | 0.3312   | 6.34E-02 | -0.4878 | 0.2576 |
| 9:12290333 | rs12555542  | C | T | 0.71 | 2.63E-05 | 1.0781  | 0.2372 | 1.19E-01 | -0.5092  | 0.3361   | 5.72E-02 | -0.5128 | 0.2641 |

|             |             |   |   |      |          |         |        |          |         |        |          |         |        |
|-------------|-------------|---|---|------|----------|---------|--------|----------|---------|--------|----------|---------|--------|
| 9:12290653  | rs10960567  | T | C | 0.71 | 2.63E-05 | 1.0773  | 0.2370 | 1.18E-01 | -0.5089 | 0.3359 | 5.70E-02 | -0.5128 | 0.2639 |
| 9:12290837  | rs11794979  | G | T | 0.73 | 3.74E-05 | 1.0508  | 0.2364 | 1.15E-01 | -0.5123 | 0.3343 | 4.37E-02 | -0.5376 | 0.2607 |
| 9:122926890 | rs576745861 | R | D | 0.44 | 6.05E-01 | -0.1471 | 0.2849 | 8.95E-05 | 1.1493  | 0.2878 | 4.55E-02 | 0.5541  | 0.2710 |
| 9:12538480  | rs10960701  | C | A | 0.83 | 4.53E-02 | 0.5275  | 0.2594 | 3.53E-05 | -1.2602 | 0.2992 | 7.69E-01 | 0.0780  | 0.2640 |
| 9:12539122  | rs72700779  | G | A | 0.83 | 4.68E-02 | 0.5227  | 0.2589 | 3.74E-05 | -1.2535 | 0.2985 | 7.42E-01 | 0.0871  | 0.2633 |
| 9:12539582  | rs59860343  | G | A | 0.83 | 4.43E-02 | 0.5289  | 0.2588 | 3.46E-05 | -1.2599 | 0.2990 | 7.68E-01 | 0.0780  | 0.2635 |
| 9:12539719  | rs116720470 | C | T | 0.83 | 4.62E-02 | 0.5235  | 0.2585 | 3.73E-05 | -1.2525 | 0.2984 | 7.42E-01 | 0.0870  | 0.2630 |
| 9:12540358  | rs12235745  | G | A | 0.83 | 4.61E-02 | 0.5237  | 0.2584 | 3.73E-05 | -1.2523 | 0.2984 | 7.42E-01 | 0.0869  | 0.2630 |
| 9:125542991 | rs33965089  | R | I | 0.80 | 1.52E-02 | 0.8333  | 0.3350 | 6.16E-01 | -0.2145 | 0.4267 | 4.66E-05 | -1.3211 | 0.2997 |
| 9:12561164  | rs12000212  | T | A | 0.83 | 4.91E-02 | 0.5235  | 0.2621 | 3.74E-05 | -1.2708 | 0.3027 | 8.30E-01 | 0.0576  | 0.2665 |
| 9:13479775  | rs56412453  | A | G | 0.65 | 2.11E-01 | 0.2901  | 0.2306 | 7.55E-05 | -1.0192 | 0.2541 | 5.60E-02 | -0.4341 | 0.2226 |
| 9:138274187 | rs12238007  | A | G | 0.85 | 1.27E-01 | -0.4951 | 0.3221 | 7.29E-05 | 1.7396  | 0.4940 | 4.90E-01 | 0.2238  | 0.3219 |
| 9:138740350 | rs35091764  | R | D | 0.80 | 2.39E-02 | 0.5593  | 0.2425 | 9.57E-05 | -0.7979 | 0.1892 | 3.73E-02 | -0.5118 | 0.2401 |
| 9:138742077 | rs35981196  | C | G | 0.82 | 3.42E-02 | 0.5248  | 0.2434 | 9.29E-05 | -0.7879 | 0.1866 | 5.24E-02 | -0.4771 | 0.2408 |
| 9:138744527 | rs56988536  | C | T | 0.82 | 3.42E-02 | 0.5260  | 0.2440 | 9.40E-05 | -0.7892 | 0.1868 | 5.26E-02 | -0.4780 | 0.2415 |
| 9:138746319 | rs111395128 | R | I | 0.82 | 3.78E-02 | 0.5230  | 0.2476 | 9.75E-05 | -0.7946 | 0.1876 | 5.72E-02 | -0.4753 | 0.2449 |
| 9:138748802 | rs1929527   | A | G | 0.82 | 3.44E-02 | 0.5287  | 0.2455 | 9.93E-05 | -0.7904 | 0.1872 | 5.36E-02 | -0.4789 | 0.2430 |
| 9:138760015 | rs372013273 | R | I | 0.81 | 1.33E-02 | 0.6449  | 0.2540 | 6.03E-05 | -0.8370 | 0.1915 | 7.29E-02 | -0.4682 | 0.2562 |
| 9:20196505  | rs1456958   | G | T | 0.76 | 6.91E-05 | -0.9057 | 0.2123 | 3.12E-01 | 0.3255  | 0.3332 | 2.01E-01 | 0.3062  | 0.2367 |
| 9:22154664  | rs7046289   | C | T | 0.59 | 5.00E-05 | 0.8182  | 0.1876 | 2.51E-01 | -0.3179 | 0.2690 | 1.19E-02 | -0.5245 | 0.2018 |
| 9:22154682  | rs7029976   | T | A | 0.55 | 7.84E-05 | 0.8556  | 0.2023 | 2.17E-01 | -0.3602 | 0.2846 | 4.26E-03 | -0.6325 | 0.2124 |
| 9:22154684  | rs7046298   | C | T | 0.55 | 7.84E-05 | 0.8556  | 0.2023 | 2.18E-01 | -0.3599 | 0.2846 | 4.27E-03 | -0.6324 | 0.2124 |
| 9:25499673  | rs10966936  | A | T | 0.58 | 5.06E-01 | 0.1475  | 0.2218 | 3.37E-01 | -0.2620 | 0.2756 | 9.95E-05 | -0.8016 | 0.1915 |
| 9:25500174  | rs10966937  | C | T | 0.58 | 5.03E-01 | 0.1486  | 0.2217 | 3.24E-01 | -0.2692 | 0.2754 | 9.70E-05 | -0.8022 | 0.1913 |
| 9:25500909  | rs1806305   | C | A | 0.57 | 5.05E-01 | 0.1442  | 0.2164 | 2.60E-01 | -0.2987 | 0.2655 | 9.20E-05 | -0.7852 | 0.1866 |
| 9:36231127  | rs201933111 | R | D | 0.74 | 9.22E-03 | 0.8365  | 0.3123 | 1.01E-06 | -1.4628 | 0.2753 | 2.43E-02 | -0.7211 | 0.3118 |
| 9:36478814  | rs58286962  | D | R | 0.69 | 1.05E-01 | 0.3642  | 0.2227 | 7.41E-05 | -0.9075 | 0.2175 | 7.83E-01 | -0.0619 | 0.2239 |
| 9:36480711  | rs71531226  | G | C | 0.74 | 6.45E-02 | 0.4136  | 0.2208 | 4.58E-05 | -0.9035 | 0.2105 | 7.88E-01 | -0.0603 | 0.2236 |
| 9:78028974  | rs200939903 | R | D | 0.90 | 1.69E-01 | 0.4581  | 0.3306 | 7.78E-03 | -0.9400 | 0.3152 | 5.10E-05 | -1.2528 | 0.2859 |
| 9:78036584  | rs13294994  | C | T | 0.93 | 5.89E-01 | 0.1948  | 0.3610 | 7.23E-02 | -0.7147 | 0.3643 | 9.42E-05 | -1.3066 | 0.3110 |
| 9:86015579  | rs4877758   | G | T | 0.78 | 1.73E-01 | 0.3912  | 0.2853 | 2.22E-01 | -0.4130 | 0.3393 | 4.19E-05 | -1.0913 | 0.2458 |
| 9:92863041  | rs10992083  | T | C | 0.74 | 2.06E-02 | 0.5299  | 0.2239 | 5.67E-05 | -0.8727 | 0.2035 | 1.19E-01 | -0.3575 | 0.2259 |
| X:122365098 | rs5911554   | C | T | 0.77 | 4.13E-01 | 0.1535  | 0.1873 | 6.66E-01 | -0.0924 | 0.2154 | 4.11E-05 | -0.7097 | 0.1597 |
| X:122365147 | rs5911555   | G | A | 0.77 | 4.06E-01 | 0.1573  | 0.1893 | 6.44E-01 | -0.0999 | 0.2177 | 4.36E-05 | -0.7151 | 0.1615 |

|             |             |   |   |      |          |         |        |          |         |        |          |         |        |
|-------------|-------------|---|---|------|----------|---------|--------|----------|---------|--------|----------|---------|--------|
| X:122369317 | rs1476014   | A | G | 0.77 | 4.18E-01 | 0.1525  | 0.1881 | 6.59E-01 | -0.0949 | 0.2163 | 5.08E-05 | -0.7050 | 0.1608 |
| X:122370414 | rs10594525  | D | R | 0.77 | 4.25E-01 | 0.1499  | 0.1879 | 6.61E-01 | -0.0941 | 0.2160 | 5.53E-05 | -0.7015 | 0.1609 |
| X:122394372 | rs189865332 | A | G | 0.72 | 2.74E-01 | 0.2126  | 0.1937 | 7.51E-01 | 0.0708  | 0.2206 | 7.30E-05 | -0.7164 | 0.1675 |
| X:137943387 | rs7060413   | G | A | 0.72 | 9.63E-01 | 0.0087  | 0.1912 | 1.97E-01 | -0.2810 | 0.2184 | 1.11E-05 | -0.7635 | 0.1585 |
| X:139917555 | rs5907696   | C | T | 0.87 | 2.26E-01 | -0.2996 | 0.2466 | 8.86E-05 | 1.8675  | 0.7708 | 7.29E-02 | 0.4362  | 0.2387 |
| X:146121482 | N/A         | R | D | 0.94 | 4.37E-01 | 0.5327  | 0.6842 | 7.82E-05 | -2.0210 | 0.4513 | 2.11E-01 | -0.8431 | 0.6671 |
| X:3548751   | rs2398586   | C | G | 0.50 | 2.52E-05 | -0.8388 | 0.1840 | 7.93E-02 | 0.4579  | 0.2616 | 2.56E-02 | 0.4644  | 0.2026 |
| X:38877272  | rs2223159   | T | C | 0.72 | 4.81E-01 | -0.1448 | 0.2054 | 9.60E-01 | 0.0111  | 0.2242 | 8.78E-05 | -0.7477 | 0.1771 |
| X:40467447  | rs199896654 | I | R | 0.83 | 9.18E-05 | -0.8942 | 0.2138 | 2.12E-01 | 0.4593  | 0.3854 | 3.12E-01 | 0.2432  | 0.2385 |
| X:40475498  | rs72623243  | A | G | 0.81 | 9.38E-05 | -0.8480 | 0.2030 | 2.09E-01 | 0.4404  | 0.3643 | 2.90E-01 | 0.2417  | 0.2262 |
| X:54500421  | rs5961069   | T | A | 0.78 | 5.05E-01 | 0.1555  | 0.2333 | 2.51E-01 | -0.3185 | 0.2792 | 5.91E-05 | -0.8663 | 0.1996 |
| X:57120828  | rs5960898   | G | A | 0.80 | 4.93E-01 | 0.1405  | 0.2049 | 9.76E-01 | 0.0075  | 0.2445 | 9.43E-05 | -0.7426 | 0.1767 |
| X:57122570  | rs10481897  | C | T | 0.81 | 5.00E-01 | 0.1444  | 0.2138 | 9.76E-01 | 0.0077  | 0.2545 | 9.26E-05 | -0.7757 | 0.1844 |
| X:57189999  | rs139635869 | C | T | 0.80 | 5.20E-01 | 0.1318  | 0.2049 | 9.80E-01 | -0.0061 | 0.2441 | 6.04E-05 | -0.7599 | 0.1754 |
| X:57193835  | rs28730481  | A | G | 0.81 | 5.25E-01 | 0.1359  | 0.2137 | 9.82E-01 | -0.0057 | 0.2540 | 6.07E-05 | -0.7922 | 0.1829 |
| X:57241324  | rs5960927   | G | A | 0.80 | 5.29E-01 | 0.1279  | 0.2033 | 9.81E-01 | -0.0057 | 0.2420 | 5.88E-05 | -0.7547 | 0.1739 |
| X:57326746  | rs151008828 | A | G | 0.80 | 5.04E-01 | 0.1411  | 0.2113 | 9.60E-01 | -0.0127 | 0.2531 | 5.49E-05 | -0.7875 | 0.1806 |
| X:57362156  | rs112562331 | A | T | 0.80 | 4.96E-01 | 0.1463  | 0.2149 | 9.52E-01 | -0.0155 | 0.2581 | 5.30E-05 | -0.8025 | 0.1836 |
| X:57421091  | rs200105825 | R | D | 0.81 | 4.98E-01 | 0.1552  | 0.2289 | 9.45E-01 | -0.0192 | 0.2754 | 5.51E-05 | -0.8531 | 0.1957 |
| X:57469183  | rs56092657  | G | C | 0.89 | 5.21E-01 | 0.2426  | 0.3781 | 9.37E-01 | -0.0384 | 0.4776 | 4.75E-05 | -1.4194 | 0.3223 |
| X:57513729  | rs373236218 | R | D | 0.80 | 4.89E-01 | 0.1548  | 0.2236 | 9.37E-01 | -0.0218 | 0.2725 | 5.21E-05 | -0.8357 | 0.1910 |
| X:57543583  | rs12392773  | C | A | 0.81 | 4.51E-01 | 0.1774  | 0.2352 | 9.03E-01 | -0.0350 | 0.2870 | 5.64E-05 | -0.8766 | 0.2014 |
| X:57580906  | rs73226014  | G | A | 0.81 | 4.53E-01 | 0.1785  | 0.2380 | 9.00E-01 | -0.0371 | 0.2915 | 5.90E-05 | -0.8848 | 0.2039 |
| X:57693862  | rs5961028   | A | G | 0.81 | 4.92E-01 | 0.1613  | 0.2349 | 9.29E-01 | -0.0256 | 0.2862 | 6.55E-05 | -0.8678 | 0.2014 |
| X:57705777  | rs73226022  | G | T | 0.80 | 4.81E-01 | 0.1607  | 0.2278 | 9.28E-01 | -0.0255 | 0.2781 | 6.76E-05 | -0.8405 | 0.1955 |
| X:57718471  | rs73226025  | A | G | 0.81 | 4.90E-01 | 0.1633  | 0.2366 | 9.31E-01 | -0.0252 | 0.2888 | 7.26E-05 | -0.8697 | 0.2032 |
| X:57802424  | rs5988719   | C | T | 0.80 | 5.01E-01 | 0.1518  | 0.2253 | 9.24E-01 | -0.0267 | 0.2760 | 9.30E-05 | -0.8173 | 0.1943 |
| X:57955169  | rs73226045  | G | A | 0.80 | 4.52E-01 | 0.1579  | 0.2101 | 8.65E-01 | -0.0441 | 0.2578 | 8.41E-05 | -0.7669 | 0.1811 |
| X:57995561  | rs5947383   | G | T | 0.54 | 9.26E-01 | 0.0176  | 0.1912 | 1.77E-02 | -0.5842 | 0.2429 | 9.90E-05 | -0.6882 | 0.1644 |
| X:58021668  | rs73209406  | A | T | 0.80 | 4.98E-01 | 0.1448  | 0.2139 | 9.23E-01 | -0.0258 | 0.2659 | 6.45E-05 | -0.7910 | 0.1834 |
| X:58052229  | rs5988699   | A | G | 0.80 | 6.07E-01 | 0.1139  | 0.2219 | 9.68E-01 | 0.0115  | 0.2805 | 7.69E-05 | -0.8118 | 0.1905 |
| X:88972248  | rs5940734   | A | G | 0.55 | 3.75E-02 | -0.3481 | 0.1645 | 6.89E-05 | 0.8467  | 0.2194 | 8.84E-01 | 0.0245  | 0.1680 |
| X:88972361  | rs5940735   | T | C | 0.55 | 3.73E-02 | -0.3483 | 0.1644 | 6.87E-05 | 0.8466  | 0.2193 | 8.84E-01 | 0.0246  | 0.1679 |
| X:88972637  | rs5941306   | C | T | 0.56 | 3.68E-02 | -0.3482 | 0.1639 | 6.73E-05 | 0.8464  | 0.2192 | 8.77E-01 | 0.0261  | 0.1675 |

|            |             |   |   |      |          |         |        |          |        |        |          |        |        |
|------------|-------------|---|---|------|----------|---------|--------|----------|--------|--------|----------|--------|--------|
| X:88973755 | rs11799023  | G | A | 0.55 | 3.39E-02 | -0.3502 | 0.1622 | 6.40E-05 | 0.8432 | 0.2178 | 8.59E-01 | 0.0297 | 0.1659 |
| X:88974248 | rs5984371   | G | A | 0.55 | 3.31E-02 | -0.3503 | 0.1614 | 6.38E-05 | 0.8413 | 0.2174 | 8.59E-01 | 0.0295 | 0.1652 |
| X:88974449 | rs5984372   | G | A | 0.55 | 3.29E-02 | -0.3506 | 0.1614 | 6.39E-05 | 0.8414 | 0.2175 | 8.58E-01 | 0.0296 | 0.1652 |
| X:88976964 | rs112138412 | C | T | 0.55 | 3.15E-02 | -0.3515 | 0.1604 | 6.17E-05 | 0.8396 | 0.2167 | 8.51E-01 | 0.0310 | 0.1642 |
| X:88977243 | rs143182906 | C | T | 0.55 | 3.13E-02 | -0.3516 | 0.1603 | 6.18E-05 | 0.8393 | 0.2166 | 8.51E-01 | 0.0310 | 0.1642 |
| X:88977421 | rs77033100  | A | C | 0.60 | 4.15E-02 | -0.3645 | 0.1759 | 7.75E-05 | 0.8830 | 0.2310 | 8.46E-01 | 0.0351 | 0.1794 |
| X:88977800 | rs149903691 | T | C | 0.55 | 3.11E-02 | -0.3515 | 0.1600 | 6.11E-05 | 0.8387 | 0.2164 | 8.47E-01 | 0.0318 | 0.1639 |
| X:88978080 | N/A         | C | A | 0.55 | 3.09E-02 | -0.3517 | 0.1599 | 6.07E-05 | 0.8388 | 0.2163 | 8.46E-01 | 0.0319 | 0.1638 |
| X:88978081 | N/A         | T | C | 0.55 | 3.09E-02 | -0.3517 | 0.1599 | 6.07E-05 | 0.8387 | 0.2163 | 8.46E-01 | 0.0319 | 0.1638 |
| X:88978213 | rs201473310 | T | G | 0.58 | 4.56E-02 | -0.3427 | 0.1688 | 6.00E-05 | 0.8981 | 0.2326 | 9.54E-01 | 0.0099 | 0.1719 |
| X:88979181 | rs181389657 | G | A | 0.55 | 3.06E-02 | -0.3518 | 0.1597 | 6.05E-05 | 0.8381 | 0.2162 | 8.46E-01 | 0.0319 | 0.1636 |
| X:88979334 | rs5941312   | T | G | 0.55 | 3.04E-02 | -0.3520 | 0.1596 | 6.03E-05 | 0.8381 | 0.2161 | 8.45E-01 | 0.0321 | 0.1635 |
| X:88979493 | rs2498105   | A | G | 0.59 | 4.87E-02 | -0.3420 | 0.1709 | 7.48E-05 | 0.8833 | 0.2309 | 9.77E-01 | 0.0051 | 0.1739 |
| X:88979554 | rs5984373   | C | T | 0.57 | 4.73E-02 | -0.3350 | 0.1663 | 7.54E-05 | 0.8612 | 0.2248 | 9.57E-01 | 0.0091 | 0.1693 |
| X:88979812 | rs5984375   | C | G | 0.55 | 3.03E-02 | -0.3523 | 0.1596 | 5.90E-05 | 0.8388 | 0.2161 | 8.46E-01 | 0.0319 | 0.1635 |
| X:88979839 | rs2498106   | T | G | 0.55 | 3.02E-02 | -0.3528 | 0.1597 | 5.78E-05 | 0.8414 | 0.2166 | 8.47E-01 | 0.0318 | 0.1637 |
| X:88980030 | rs5941313   | T | C | 0.55 | 3.01E-02 | -0.3522 | 0.1594 | 5.98E-05 | 0.8379 | 0.2160 | 8.44E-01 | 0.0322 | 0.1633 |
| X:88980851 | rs62594581  | G | T | 0.55 | 2.82E-02 | -0.3529 | 0.1577 | 5.69E-05 | 0.8343 | 0.2147 | 8.31E-01 | 0.0348 | 0.1618 |
| X:88981132 | rs199525938 | G | T | 0.55 | 2.82E-02 | -0.3528 | 0.1577 | 5.71E-05 | 0.8340 | 0.2147 | 8.31E-01 | 0.0347 | 0.1617 |
| X:88981890 | rs2498110   | A | G | 0.58 | 3.70E-02 | -0.3502 | 0.1650 | 6.42E-05 | 0.8743 | 0.2275 | 9.30E-01 | 0.0150 | 0.1686 |
| X:88982200 | rs5983964   | A | G | 0.54 | 2.55E-02 | -0.3542 | 0.1554 | 5.46E-05 | 0.8289 | 0.2132 | 8.22E-01 | 0.0361 | 0.1596 |
| X:88982702 | rs2498113   | C | G | 0.54 | 2.54E-02 | -0.3548 | 0.1555 | 5.43E-05 | 0.8302 | 0.2134 | 8.14E-01 | 0.0377 | 0.1598 |
| X:88982770 | rs62593379  | T | C | 0.54 | 2.54E-02 | -0.3545 | 0.1555 | 5.47E-05 | 0.8291 | 0.2132 | 8.25E-01 | 0.0355 | 0.1597 |
| X:88982933 | rs111880173 | R | D | 0.54 | 2.53E-02 | -0.3543 | 0.1552 | 5.46E-05 | 0.8283 | 0.2131 | 8.21E-01 | 0.0362 | 0.1594 |
| X:88982935 | rs115421359 | T | A | 0.54 | 2.43E-02 | -0.3548 | 0.1543 | 5.45E-05 | 0.8259 | 0.2125 | 8.22E-01 | 0.0358 | 0.1586 |
| X:88983774 | rs113155846 | R | D | 0.54 | 2.40E-02 | -0.3548 | 0.1540 | 5.41E-05 | 0.8253 | 0.2124 | 8.21E-01 | 0.0360 | 0.1584 |
| X:88983954 | rs5941316   | A | C | 0.54 | 2.39E-02 | -0.3548 | 0.1539 | 5.40E-05 | 0.8248 | 0.2122 | 8.20E-01 | 0.0361 | 0.1582 |
| X:88984203 | rs2436299   | A | C | 0.54 | 2.41E-02 | -0.3552 | 0.1542 | 5.42E-05 | 0.8259 | 0.2125 | 8.24E-01 | 0.0354 | 0.1585 |
| X:88985460 | rs60905905  | R | D | 0.54 | 2.40E-02 | -0.3553 | 0.1542 | 5.40E-05 | 0.8261 | 0.2125 | 8.21E-01 | 0.0360 | 0.1585 |
| X:88985976 | rs62593401  | T | C | 0.54 | 2.40E-02 | -0.3553 | 0.1542 | 5.40E-05 | 0.8264 | 0.2126 | 8.22E-01 | 0.0359 | 0.1586 |
| X:88986086 | rs56001694  | G | A | 0.54 | 2.41E-02 | -0.3555 | 0.1545 | 5.42E-05 | 0.8269 | 0.2127 | 8.24E-01 | 0.0354 | 0.1588 |
| X:88986600 | rs143864702 | A | C | 0.54 | 2.41E-02 | -0.3554 | 0.1544 | 5.41E-05 | 0.8269 | 0.2128 | 8.22E-01 | 0.0359 | 0.1587 |
| X:88986657 | rs116619432 | T | G | 0.54 | 2.41E-02 | -0.3555 | 0.1544 | 5.40E-05 | 0.8268 | 0.2127 | 8.22E-01 | 0.0358 | 0.1587 |
| X:88986880 | rs377395343 | C | G | 0.54 | 2.41E-02 | -0.3556 | 0.1544 | 5.40E-05 | 0.8271 | 0.2128 | 8.22E-01 | 0.0359 | 0.1587 |

|            |             |   |   |      |          |         |        |          |        |        |          |        |        |
|------------|-------------|---|---|------|----------|---------|--------|----------|--------|--------|----------|--------|--------|
| X:88986920 | rs371198939 | A | C | 0.54 | 2.41E-02 | -0.3556 | 0.1544 | 5.40E-05 | 0.8271 | 0.2128 | 8.22E-01 | 0.0359 | 0.1587 |
| X:88987112 | rs139671882 | A | C | 0.54 | 2.41E-02 | -0.3556 | 0.1545 | 5.40E-05 | 0.8273 | 0.2128 | 8.22E-01 | 0.0359 | 0.1588 |
| X:88987252 | rs2498126   | A | C | 0.54 | 2.41E-02 | -0.3557 | 0.1545 | 5.40E-05 | 0.8277 | 0.2129 | 8.23E-01 | 0.0358 | 0.1589 |
| X:88987431 | rs5941319   | A | G | 0.54 | 2.42E-02 | -0.3557 | 0.1546 | 5.40E-05 | 0.8278 | 0.2130 | 8.23E-01 | 0.0358 | 0.1589 |
| X:88987738 | rs5940740   | C | T | 0.54 | 2.42E-02 | -0.3558 | 0.1546 | 5.39E-05 | 0.8279 | 0.2130 | 8.23E-01 | 0.0358 | 0.1589 |
| X:88987773 | rs5941320   | C | T | 0.54 | 2.42E-02 | -0.3560 | 0.1547 | 5.39E-05 | 0.8284 | 0.2131 | 8.22E-01 | 0.0359 | 0.1590 |
| X:88987779 | rs5941321   | A | G | 0.54 | 2.42E-02 | -0.3558 | 0.1546 | 5.39E-05 | 0.8281 | 0.2130 | 8.23E-01 | 0.0358 | 0.1589 |
| X:88987886 | N/A         | R | I | 0.54 | 2.42E-02 | -0.3558 | 0.1546 | 5.39E-05 | 0.8281 | 0.2130 | 8.23E-01 | 0.0358 | 0.1590 |
| X:88988448 | rs3924952   | T | C | 0.54 | 2.42E-02 | -0.3560 | 0.1547 | 5.39E-05 | 0.8286 | 0.2131 | 8.23E-01 | 0.0358 | 0.1591 |
| X:88988567 | rs3924951   | A | T | 0.54 | 2.43E-02 | -0.3563 | 0.1550 | 5.40E-05 | 0.8295 | 0.2133 | 8.26E-01 | 0.0353 | 0.1593 |
| X:88988691 | rs55890612  | G | C | 0.54 | 2.43E-02 | -0.3566 | 0.1551 | 5.36E-05 | 0.8303 | 0.2135 | 8.25E-01 | 0.0354 | 0.1594 |
| X:88989009 | rs55908407  | G | A | 0.54 | 2.44E-02 | -0.3569 | 0.1553 | 5.38E-05 | 0.8310 | 0.2137 | 8.25E-01 | 0.0355 | 0.1596 |
| X:88989019 | rs55728255  | C | T | 0.54 | 2.44E-02 | -0.3568 | 0.1553 | 5.38E-05 | 0.8310 | 0.2137 | 8.25E-01 | 0.0355 | 0.1596 |
| X:88989265 | rs7883216   | T | C | 0.54 | 2.44E-02 | -0.3569 | 0.1553 | 5.36E-05 | 0.8314 | 0.2138 | 8.25E-01 | 0.0354 | 0.1597 |
| X:88989941 | rs5941323   | C | A | 0.54 | 2.45E-02 | -0.3570 | 0.1555 | 5.38E-05 | 0.8319 | 0.2139 | 8.26E-01 | 0.0354 | 0.1598 |
| X:88990017 | rs5941324   | C | T | 0.54 | 2.45E-02 | -0.3570 | 0.1555 | 5.37E-05 | 0.8321 | 0.2139 | 8.26E-01 | 0.0354 | 0.1598 |
| X:88990045 | rs5940741   | T | C | 0.54 | 2.45E-02 | -0.3570 | 0.1555 | 5.37E-05 | 0.8321 | 0.2139 | 8.26E-01 | 0.0354 | 0.1599 |
| X:88990257 | rs5940742   | A | G | 0.54 | 2.46E-02 | -0.3572 | 0.1557 | 5.39E-05 | 0.8326 | 0.2141 | 8.28E-01 | 0.0350 | 0.1600 |
| X:88990444 | rs28893821  | T | C | 0.54 | 2.45E-02 | -0.3571 | 0.1556 | 5.39E-05 | 0.8323 | 0.2140 | 8.26E-01 | 0.0353 | 0.1599 |
| X:88990476 | rs28789747  | C | G | 0.54 | 2.45E-02 | -0.3571 | 0.1556 | 5.39E-05 | 0.8323 | 0.2140 | 8.26E-01 | 0.0352 | 0.1599 |
| X:88990742 | rs5941326   | G | A | 0.54 | 2.45E-02 | -0.3576 | 0.1558 | 5.45E-05 | 0.8336 | 0.2146 | 8.29E-01 | 0.0347 | 0.1602 |
| X:88991056 | rs5941327   | A | G | 0.54 | 2.45E-02 | -0.3574 | 0.1557 | 5.38E-05 | 0.8328 | 0.2142 | 8.26E-01 | 0.0353 | 0.1600 |
| X:88991175 | rs11796443  | G | A | 0.54 | 2.46E-02 | -0.3574 | 0.1557 | 5.39E-05 | 0.8329 | 0.2142 | 8.26E-01 | 0.0353 | 0.1601 |
| X:88991396 | rs201159284 | R | I | 0.54 | 2.46E-02 | -0.3574 | 0.1557 | 5.39E-05 | 0.8330 | 0.2142 | 8.27E-01 | 0.0352 | 0.1601 |
| X:88992089 | rs74445676  | G | C | 0.54 | 2.46E-02 | -0.3575 | 0.1558 | 5.40E-05 | 0.8332 | 0.2143 | 8.27E-01 | 0.0351 | 0.1602 |
| X:88992104 | rs28864731  | G | A | 0.54 | 2.46E-02 | -0.3576 | 0.1559 | 5.39E-05 | 0.8334 | 0.2143 | 8.27E-01 | 0.0351 | 0.1602 |
| X:88993137 | rs4535915   | G | A | 0.54 | 2.46E-02 | -0.3577 | 0.1560 | 5.39E-05 | 0.8340 | 0.2144 | 8.28E-01 | 0.0350 | 0.1603 |
| X:88993140 | rs5984384   | T | C | 0.54 | 2.46E-02 | -0.3578 | 0.1560 | 5.39E-05 | 0.8340 | 0.2144 | 8.28E-01 | 0.0350 | 0.1603 |
| X:88993274 | rs4372165   | T | C | 0.54 | 2.47E-02 | -0.3577 | 0.1560 | 5.39E-05 | 0.8341 | 0.2145 | 8.28E-01 | 0.0350 | 0.1604 |
| X:88993676 | rs62593418  | G | T | 0.54 | 2.48E-02 | -0.3578 | 0.1561 | 5.39E-05 | 0.8344 | 0.2145 | 8.28E-01 | 0.0350 | 0.1605 |
| X:88993851 | rs66733457  | T | C | 0.54 | 2.48E-02 | -0.3577 | 0.1561 | 5.39E-05 | 0.8344 | 0.2145 | 8.28E-01 | 0.0351 | 0.1605 |
| X:88994011 | rs62593419  | T | C | 0.54 | 2.48E-02 | -0.3578 | 0.1562 | 5.39E-05 | 0.8345 | 0.2146 | 8.28E-01 | 0.0350 | 0.1605 |
| X:88994303 | rs7880736   | A | G | 0.54 | 2.50E-02 | -0.3586 | 0.1568 | 5.15E-05 | 0.8388 | 0.2152 | 8.38E-01 | 0.0331 | 0.1611 |
| X:88994388 | rs7881978   | T | C | 0.54 | 2.48E-02 | -0.3579 | 0.1563 | 5.40E-05 | 0.8350 | 0.2147 | 8.29E-01 | 0.0349 | 0.1606 |

|            |             |   |   |      |          |         |        |          |        |        |          |        |        |
|------------|-------------|---|---|------|----------|---------|--------|----------|--------|--------|----------|--------|--------|
| X:88994909 | rs5941328   | G | A | 0.54 | 2.48E-02 | -0.3582 | 0.1564 | 5.39E-05 | 0.8355 | 0.2148 | 8.29E-01 | 0.0349 | 0.1607 |
| X:88995097 | rs5941329   | C | T | 0.54 | 2.48E-02 | -0.3582 | 0.1564 | 5.39E-05 | 0.8355 | 0.2148 | 8.29E-01 | 0.0349 | 0.1607 |
| X:88995217 | rs5941330   | T | G | 0.54 | 2.48E-02 | -0.3582 | 0.1564 | 5.40E-05 | 0.8354 | 0.2148 | 8.29E-01 | 0.0349 | 0.1607 |
| X:88995324 | rs5941331   | G | T | 0.54 | 2.48E-02 | -0.3583 | 0.1565 | 5.40E-05 | 0.8357 | 0.2149 | 8.29E-01 | 0.0348 | 0.1608 |
| X:88995964 | rs5941332   | G | A | 0.54 | 2.49E-02 | -0.3583 | 0.1565 | 5.41E-05 | 0.8359 | 0.2150 | 8.29E-01 | 0.0349 | 0.1609 |
| X:88996012 | rs5941333   | C | G | 0.54 | 2.49E-02 | -0.3584 | 0.1566 | 5.40E-05 | 0.8361 | 0.2150 | 8.29E-01 | 0.0349 | 0.1609 |
| X:88996245 | rs5941334   | C | T | 0.54 | 2.49E-02 | -0.3585 | 0.1566 | 5.40E-05 | 0.8363 | 0.2150 | 8.29E-01 | 0.0349 | 0.1609 |
| X:88996463 | rs5940743   | T | C | 0.54 | 2.49E-02 | -0.3585 | 0.1566 | 5.41E-05 | 0.8363 | 0.2150 | 8.29E-01 | 0.0349 | 0.1610 |
| X:88996799 | rs1928406   | A | G | 0.54 | 2.50E-02 | -0.3585 | 0.1567 | 5.40E-05 | 0.8366 | 0.2151 | 8.30E-01 | 0.0347 | 0.1610 |
| X:88997222 | rs1928404   | A | G | 0.54 | 2.50E-02 | -0.3585 | 0.1567 | 5.40E-05 | 0.8366 | 0.2151 | 8.30E-01 | 0.0348 | 0.1610 |
| X:88997273 | rs5983967   | A | G | 0.54 | 2.50E-02 | -0.3585 | 0.1568 | 5.42E-05 | 0.8366 | 0.2151 | 8.30E-01 | 0.0348 | 0.1611 |
| X:88997343 | rs5983968   | T | C | 0.56 | 8.26E-03 | -0.4232 | 0.1556 | 3.10E-05 | 0.8936 | 0.2250 | 4.73E-01 | 0.1170 | 0.1620 |
| X:88997418 | rs200284748 | R | I | 0.54 | 2.51E-02 | -0.3586 | 0.1569 | 5.42E-05 | 0.8371 | 0.2152 | 8.31E-01 | 0.0346 | 0.1612 |
| X:88997470 | rs5941335   | A | G | 0.54 | 2.50E-02 | -0.3586 | 0.1568 | 5.42E-05 | 0.8370 | 0.2152 | 8.30E-01 | 0.0348 | 0.1611 |
| X:88997856 | rs5940744   | T | C | 0.54 | 2.50E-02 | -0.3588 | 0.1569 | 5.40E-05 | 0.8374 | 0.2153 | 8.30E-01 | 0.0347 | 0.1612 |
| X:88998033 | rs113583265 | C | G | 0.54 | 2.51E-02 | -0.3590 | 0.1570 | 5.42E-05 | 0.8379 | 0.2154 | 8.31E-01 | 0.0346 | 0.1613 |
| X:88998095 | rs62593441  | T | C | 0.54 | 2.51E-02 | -0.3588 | 0.1570 | 5.41E-05 | 0.8376 | 0.2154 | 8.31E-01 | 0.0347 | 0.1613 |
| X:88998237 | rs12850391  | A | G | 0.54 | 2.51E-02 | -0.3589 | 0.1570 | 5.40E-05 | 0.8379 | 0.2154 | 8.31E-01 | 0.0346 | 0.1613 |
| X:88998562 | rs55875767  | T | A | 0.54 | 2.51E-02 | -0.3595 | 0.1573 | 5.44E-05 | 0.8379 | 0.2155 | 8.35E-01 | 0.0338 | 0.1616 |
| X:89000953 | rs140787096 | C | T | 0.54 | 2.53E-02 | -0.3602 | 0.1577 | 5.58E-05 | 0.8373 | 0.2155 | 8.33E-01 | 0.0342 | 0.1621 |
| X:89003061 | rs5984389   | C | T | 0.54 | 2.65E-02 | -0.3593 | 0.1588 | 5.69E-05 | 0.8401 | 0.2164 | 8.40E-01 | 0.0331 | 0.1630 |
| X:89003666 | rs5983969   | T | A | 0.54 | 2.55E-02 | -0.3607 | 0.1583 | 5.63E-05 | 0.8389 | 0.2160 | 8.35E-01 | 0.0340 | 0.1626 |
| X:89004443 | rs1928402   | A | G | 0.54 | 2.57E-02 | -0.3598 | 0.1581 | 5.61E-05 | 0.8390 | 0.2160 | 8.29E-01 | 0.0353 | 0.1624 |
| X:89005266 | rs5984392   | G | A | 0.54 | 2.57E-02 | -0.3609 | 0.1585 | 5.65E-05 | 0.8400 | 0.2163 | 8.37E-01 | 0.0337 | 0.1628 |
| X:89006238 | rs5983970   | C | A | 0.54 | 2.56E-02 | -0.3612 | 0.1586 | 5.62E-05 | 0.8404 | 0.2163 | 8.34E-01 | 0.0342 | 0.1629 |
| X:89006765 | rs201752520 | R | D | 0.54 | 2.57E-02 | -0.3611 | 0.1586 | 5.65E-05 | 0.8404 | 0.2164 | 8.35E-01 | 0.0340 | 0.1629 |
| X:89007318 | rs4086250   | T | C | 0.54 | 2.57E-02 | -0.3611 | 0.1587 | 5.64E-05 | 0.8406 | 0.2164 | 8.35E-01 | 0.0341 | 0.1630 |
| X:89007999 | rs150430625 | C | T | 0.54 | 2.58E-02 | -0.3613 | 0.1588 | 5.66E-05 | 0.8411 | 0.2166 | 8.36E-01 | 0.0340 | 0.1631 |
| X:89008346 | rs62593443  | C | T | 0.54 | 2.58E-02 | -0.3613 | 0.1588 | 5.66E-05 | 0.8411 | 0.2166 | 8.36E-01 | 0.0339 | 0.1631 |
| X:89008400 | rs2771605   | G | T | 0.54 | 2.58E-02 | -0.3614 | 0.1589 | 5.66E-05 | 0.8412 | 0.2166 | 8.37E-01 | 0.0338 | 0.1632 |
| X:89008626 | rs2771612   | A | G | 0.54 | 2.60E-02 | -0.3606 | 0.1587 | 5.64E-05 | 0.8411 | 0.2165 | 8.30E-01 | 0.0352 | 0.1630 |
| X:89010519 | rs5984397   | G | T | 0.55 | 2.53E-02 | -0.3662 | 0.1604 | 5.71E-05 | 0.8519 | 0.2203 | 8.63E-01 | 0.0286 | 0.1648 |
| X:89010521 | rs5984398   | A | G | 0.55 | 2.53E-02 | -0.3664 | 0.1605 | 5.68E-05 | 0.8522 | 0.2203 | 8.62E-01 | 0.0287 | 0.1649 |
| X:89010553 | rs5984399   | C | G | 0.54 | 2.71E-02 | -0.3602 | 0.1598 | 5.64E-05 | 0.8456 | 0.2177 | 8.45E-01 | 0.0323 | 0.1640 |

|            |            |   |   |      |          |         |        |          |        |        |          |        |        |
|------------|------------|---|---|------|----------|---------|--------|----------|--------|--------|----------|--------|--------|
| X:89011086 | rs2771673  | G | T | 0.54 | 2.70E-02 | -0.3599 | 0.1596 | 6.07E-05 | 0.8412 | 0.2174 | 8.40E-01 | 0.0332 | 0.1638 |
| X:89011719 | rs5941339  | T | A | 0.54 | 2.69E-02 | -0.3593 | 0.1591 | 6.12E-05 | 0.8396 | 0.2172 | 8.32E-01 | 0.0348 | 0.1633 |
| X:89013049 | rs5940747  | C | T | 0.54 | 2.69E-02 | -0.3603 | 0.1596 | 6.15E-05 | 0.8405 | 0.2173 | 8.28E-01 | 0.0357 | 0.1638 |
| X:89013973 | rs5941342  | A | C | 0.54 | 2.67E-02 | -0.3608 | 0.1597 | 6.15E-05 | 0.8411 | 0.2175 | 8.31E-01 | 0.0352 | 0.1639 |
| X:89014091 | rs5941343  | C | T | 0.54 | 2.68E-02 | -0.3606 | 0.1597 | 6.18E-05 | 0.8408 | 0.2175 | 8.31E-01 | 0.0352 | 0.1639 |
| X:89015450 | rs5940748  | T | G | 0.54 | 2.78E-02 | -0.3608 | 0.1609 | 6.28E-05 | 0.8437 | 0.2183 | 8.38E-01 | 0.0339 | 0.1650 |
| X:89016167 | rs5941348  | T | C | 0.54 | 2.79E-02 | -0.3610 | 0.1609 | 6.29E-05 | 0.8440 | 0.2184 | 8.38E-01 | 0.0339 | 0.1651 |
| X:89016282 | rs5941349  | T | C | 0.54 | 2.79E-02 | -0.3609 | 0.1610 | 6.28E-05 | 0.8441 | 0.2184 | 8.38E-01 | 0.0339 | 0.1651 |
| X:89016747 | rs11796768 | C | T | 0.54 | 2.81E-02 | -0.3610 | 0.1612 | 6.38E-05 | 0.8437 | 0.2185 | 8.43E-01 | 0.0328 | 0.1654 |
| X:89017511 | rs62590968 | A | G | 0.54 | 2.81E-02 | -0.3610 | 0.1613 | 6.40E-05 | 0.8438 | 0.2185 | 8.43E-01 | 0.0329 | 0.1654 |
| X:89017626 | rs5940749  | T | A | 0.54 | 2.84E-02 | -0.3607 | 0.1614 | 6.53E-05 | 0.8439 | 0.2185 | 8.47E-01 | 0.0321 | 0.1655 |
| X:89017645 | rs5941353  | G | A | 0.54 | 2.85E-02 | -0.3602 | 0.1614 | 6.58E-05 | 0.8435 | 0.2185 | 8.47E-01 | 0.0322 | 0.1655 |
